# Supplementary material for: Transcriptional regulation of xylose utilization in Enterococcus mundtii QU 25
Source: Royal Society of Chemistry journal article supplement (doi:10.1039/c5ra15028k), 2015-01-01
Supplement: c5ra15028k1.pdf [file c5ra15028k1.pdf]

## SUPPLEMENTARY MATERIALS

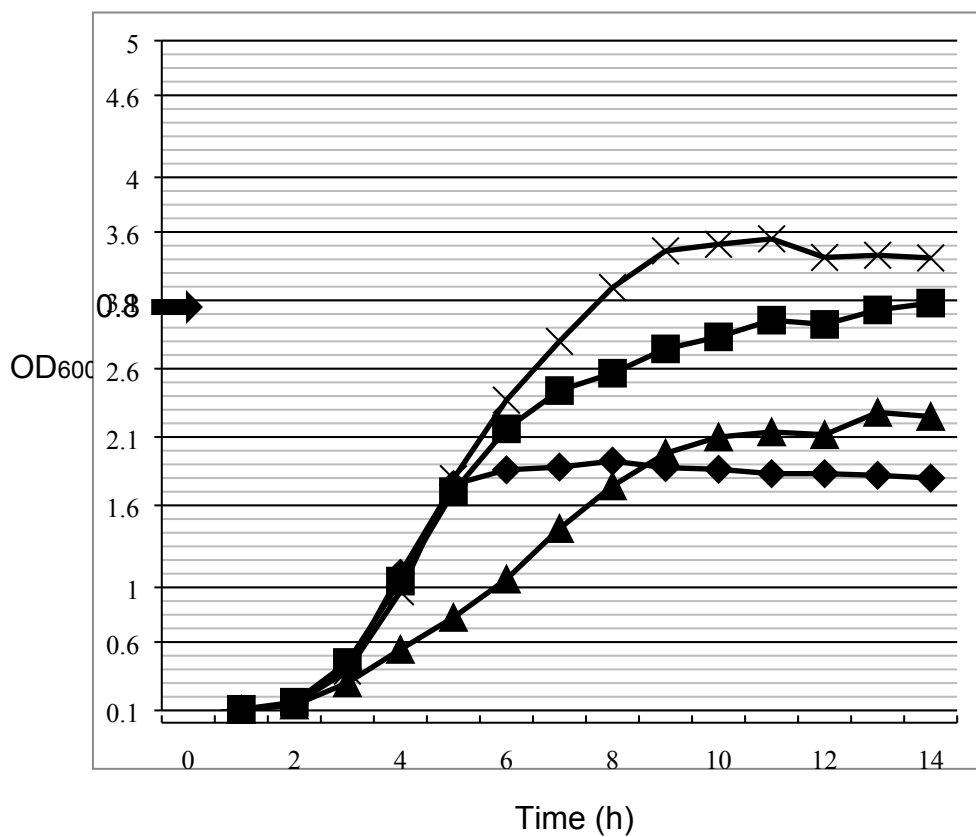

Fig. S1 Growth curve of QU 25 under low sugar conditions. Marks mean the difference of sugar species and concentration as follows: ×, G5; ■, G1X5; ▲, X5; ◆, G1 (1 g·L<sup>-1</sup> glucose). An arrowhead shows the sampling point for RNA extraction (OD<sub>600</sub> = 0.8).

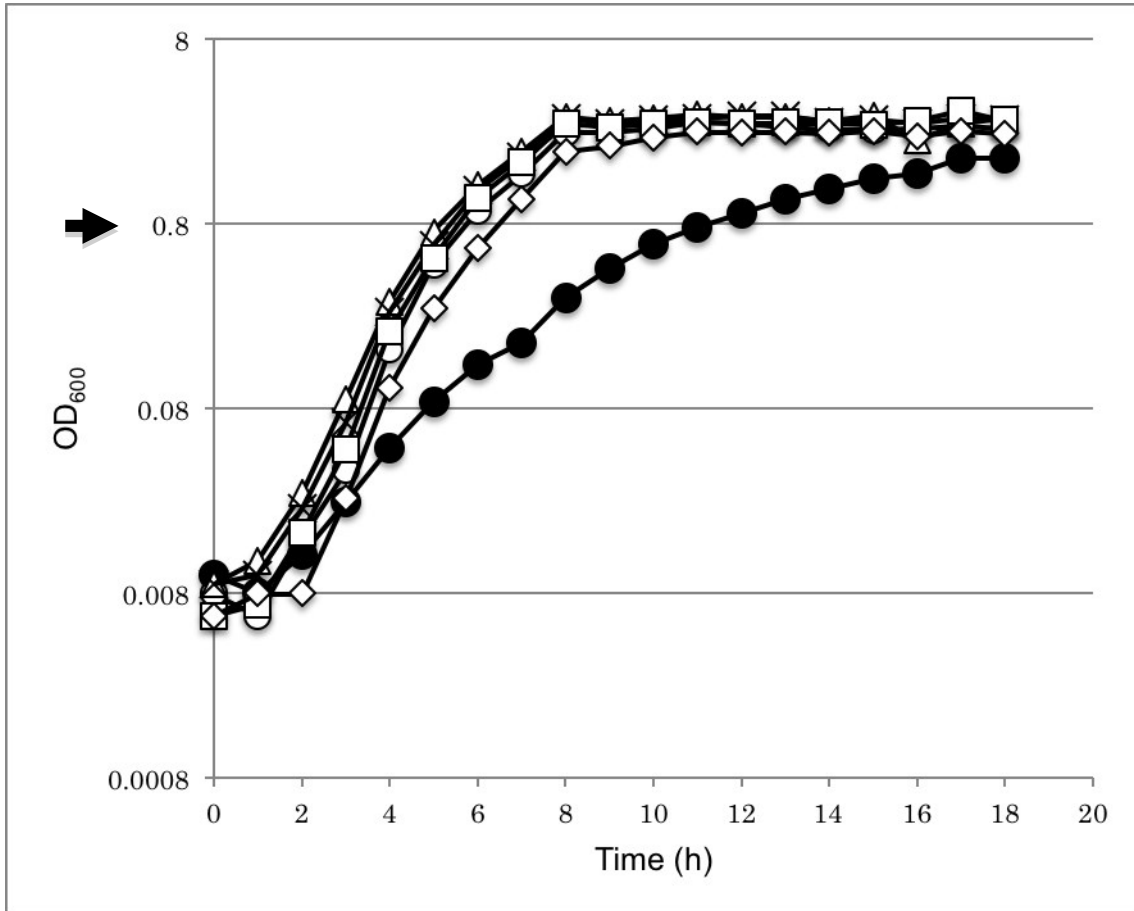

Fig. S2 Growth curve of QU 25 under high sugar conditions. Marks mean the difference of sugar species and concentration as follows:  $\Delta$ , G10X50;  $\times$ , G25X50;  $\square$ , G50X50;  $\diamond$ , G100X50;  $\circ$ , G150;  $\bullet$ , X150. An arrowhead shows the sampling point for RNA extraction ( $OD_{600} = 0.8$ ).
