# Supplementary material for: Transcriptional regulation of xylose utilization in Enterococcus mundtii QU 25
Source: Royal Society of Chemistry journal article supplement (doi:10.1039/c5ra15028k), 2015-01-01
Supplement: c5ra15028k2.xlsx [file c5ra15028k2.xlsx]

## Sheet: Table S1
Table S1 List of oligonucleotides used for the amplification of probe DNA fragments and the one used as the sequence ladder in primer extension
Primer name	Primer sequence*	Feature
xylR prob for BamH1	cgggatccAGGTGTTTGATTTCTAAAAAGTGTTGG	xylR
xylR prob rev Hind3	cccaagcttAATCAACCCGCTCTTTCTCG
xylA prob for BamH1	cgggatccCGCAGCTGCCTTCAGC	xylA
xylA prob rev Hind3	cccaagcttCCGGTCAAACGATGAAGGAG
xynB prob for BamH1	cgggatccCCCACAAATGCACCCGTAAA	xynB
xynB prob rev Hind3	cccaagcttGGAACTGACGTGAAATTAGTGGAA
araG prob for BamH1	cgggatccGCTCATTAAGCGTAGCATAGGT	araG
araG prob rev Hind3	cccaagcttAGCGCTTAGTTTGAACGCC
xylB prob for BamH1	cgggatccGCGGGTTCGGTTGCAC	xylB
xylB prob rev Hind3	cccaagcttTTATGGGTCCAAGAACACGAAC
xylA seq for	GGTAATCTCATTATTTTTCTAGTTATTTATTCTATAGC	for primer extension ladder
xylA seq rev	TCTTGTGTCATGGTATGCCCAG
* Restriction sites are shown by small characters.

## Sheet: Table S2
Table S2 RNA-seq data of all chromosomal genes under low sugar conditions
Gene name	product	note	Feature ID	Chromosome region start	Chromosome region end	Strand	GC(%)	RPKM (G5)	RPKM (X5)	RPKM (G1X5)	X5/G5	G1X5/G5
dnaA	chromosomal replication initiation protein	KO: K02313: chromosomal replication initiator protein; InterPro: IPR001957: Chromosomal replication control, initiator DnaA; IPR003593: ATPase, AAA+ type, core; IPR010921: Trp repressor/replication initiator; IPR013159: Chromosomal replication initiator, DnaA C-terminal; IPR013317: Chromosomal replication control, initiator (DnaA)/regulator (Hda); IPR018312: Chromosomal replication control, initi…	EMQU_0001	1	1335	+	39.6255	275.69	162.846	202.72	0.590685	0.735319
	DNA polymerase III subunit beta	KO: K02338: DNA polymerase III subunit beta [EC:2.7.7.7]; InterPro: IPR001001: DNA polymerase III, beta chain; IPR022634: DNA polymerase III, beta chain, N-terminal; IPR022635: DNA polymerase III, beta chain, C-terminal; IPR022637: DNA polymerase III, beta chain, central; IPR024693: DNA polymerase III beta, domain	EMQU_0002	1533	2663	+	38.2847	297.905	243.019	203.852	0.815762	0.684285
yaaA	RNA-binding S4 protein	InterPro: IPR002942: RNA-binding S4; IPR014330: RNA-binding S4-related,YaaA	EMQU_0003	2871	3113	+	40.3292	598.234	830.744	278.936	1.38866	0.466266
recF	recombination protein F	KO: K03629: DNA replication and repair protein RecF; InterPro: IPR001238: DNA-binding, RecF; IPR003395: RecF/RecN/SMC; IPR018078: DNA-binding, RecF, conserved site	EMQU_0004	3100	4215	+	36.6487	515.815	395.17	190.632	0.766108	0.369574
gyrB	DNA gyrase subunit B	KO: K02470; InterPro: IPR000565: DNA topoisomerase, type IIA, subunit B; IPR001241: DNA topoisomerase, type IIA; IPR002288: DNA topoisomerase, type IIA, subunit B, C-terminal; IPR003594: ATPase-like, ATP-binding domain; IPR006171: Toprim domain; IPR011557: DNA gyrase, subunit B; IPR013506: DNA topoisomerase, type IIA, subunit B, domain 2; IPR013759: DNA topoisomerase, type IIA, subunit B/N-termin…	EMQU_0005	4222	6168	+	43.3487	1013.33	704.513	755.475	0.695242	0.745534
	DNA gyrase subunit A	KO: K02469; InterPro: IPR002205: DNA topoisomerase, type IIA, subunit A/C-terminal; IPR005743: DNA gyrase, subunit A; IPR006691: DNA gyrase/topoisomerase IV, subunit A, C-terminal beta-pinwheel; IPR013757: DNA topoisomerase, type IIA, subunit A, alpha-helical; IPR013758: DNA topoisomerase, type IIA, subunit A/ C-terminal, alpha-beta; IPR013760: DNA topoisomerase, type IIA, central; IPR024946: Arg…	EMQU_0006	6188	8683	+	43.1891	1196.19	714.627	1117.17	0.597418	0.933934
rpsF	30S ribosomal protein S6	KO: K02990: small subunit ribosomal protein S6; InterPro: IPR000529: Ribosomal protein S6; IPR014717: Translation elongation factor EF1B/ribosomal protein S6; IPR020814: Ribosomal protein S6, plastid/chloroplast	EMQU_0007	8922	9221	+	36	1458.57	533.146	521.143	0.365526	0.357297
	single-strand binding protein	KO: K03111: single-strand DNA-binding protein; InterPro: IPR000424: Primosome PriB/single-strand DNA-binding; IPR011344: Single-strand DNA-binding; IPR012340: Nucleic acid-binding, OB-fold; IPR016027: Nucleic acid-binding, OB-fold-like	EMQU_0008	9269	9790	+	40.2299	2256.78	908.309	1231.2	0.40248	0.545557
rpsR	30S ribosomal protein S18	KO: K02963: small subunit ribosomal protein S18; InterPro: IPR001648: Ribosomal protein S18; IPR018275: Ribosomal protein S18, conserved site	EMQU_0009	9816	10052	+	38.3966	1622.69	495.777	789.104	0.305529	0.486295
	DHH family protein	InterPro: IPR000160: Diguanylate cyclase, predicted; IPR001667: Phosphoesterase, RecJ-like; IPR003156: Phosphoesterase, DHHA1; IPR014528: Signal transduction phosphoesterase predicted, YybT type	EMQU_0010	10219	12192	+	40.9828	442.596	347.7	259.659	0.785593	0.586673
rplI	50S ribosomal protein L9	KO: K02939: large subunit ribosomal protein L9; InterPro: IPR000244: Ribosomal protein L9; IPR009027: Ribosomal protein L9/RNase H1, N-terminal; IPR020069: Ribosomal protein L9, C-terminal; IPR020070: Ribosomal protein L9, N-terminal; IPR020594: Ribosomal protein L9, bacteria/chloroplast	EMQU_0011	12198	12650	+	36.4238	479.751	279.948	313.455	0.583527	0.653369
	replicative DNA helicase	KO: K02314: replicative DNA helicase [EC:3.6.4.12]; InterPro: IPR007692: DNA helicase, DnaB type; IPR007693: DNA helicase, DnaB-like, N-terminal; IPR007694: DNA helicase, DnaB-like, C-terminal; IPR016136: DNA helicase DnaB, N-terminal/DNA primase DnaG, C-terminal	EMQU_0012	12840	14207	+	42.617	319.151	72.2697	136.709	0.226443	0.428351
	adenylosuccinate synthetase	KO: K01939: adenylosuccinate synthase [EC:6.3.4.4]; InterPro: IPR001114: Adenylosuccinate synthetase; IPR018220: Adenylosuccinate synthase, active site	EMQU_0013	14583	15875	+	40.9126	452.725	202.964	62.3706	0.448316	0.137767
	degV family protein	InterPro: IPR003797: DegV	EMQU_0014	16255	17118	+	41.088	230.715	188.116	196.413	0.815358	0.851324
	ABC transporter ATP-binding protein	InterPro: IPR003439: ABC transporter-like; IPR003593: ATPase, AAA+ type, core	EMQU_0015	17191	18813	-	37.3383	260.32	137.138	81.6972	0.526806	0.313834
	hypothetical protein		EMQU_0016	19048	19569	+	33.908	515.064	193.363	184.823	0.375415	0.358834
	pyruvate oxidase	KO: K00158: pyruvate oxidase [EC:1.2.3.3]; InterPro: IPR000399: TPP-binding enzyme, conserved site; IPR011766: Thiamine pyrophosphate enzyme, C-terminal TPP-binding; IPR012000: Thiamine pyrophosphate enzyme, central domain; IPR012001: Thiamine pyrophosphate enzyme, N-terminal TPP-binding domain; IPR014092: Pyruvate oxidase	EMQU_0017	19670	21412	-	43.4309	364.015	405.363	229.921	1.11359	0.631625
	gfo/Idh/MocA family oxidoreductase	KO: K00540; InterPro: IPR000683: Oxidoreductase, N-terminal; IPR004104: Oxidoreductase, C-terminal; IPR016040: NAD(P)-binding domain	EMQU_0018	21572	22549	+	41.7178	124.779	34.9312	70.3181	0.279945	0.563541
	gufA-like protein zinc transporter	KO: K07238; InterPro: IPR003689: Zinc/iron permease	EMQU_0019	22647	23465	+	42.8571	432.763	123.874	103.905	0.28624	0.240096
	hypothetical protein		EMQU_0020	23545	23742	-	37.8788	144.875	0	67.4667	0	0.465689
	hypothetical protein	InterPro: IPR010617: Protein of unknown function DUF1211, TMEM175	EMQU_0021	23937	24515	+	40.0691	162.063	23.2436	107.667	0.143423	0.664351
	hypothetical protein		EMQU_0022	25154	25603	-	32.8889	76.7101	46.0104	54.9729	0.599797	0.716632
	hypothetical protein		EMQU_0023	26072	27100	+	37.7065	176.238	9.55756	94.2392	0.0542309	0.534726
celA_1	6-phospho-beta-glucosidase	KO: K01223: 6-phospho-beta-glucosidase [EC:3.2.1.86]; InterPro: IPR001360: Glycoside hydrolase, family 1; IPR013781: Glycoside hydrolase, subgroup, catalytic domain; IPR017853: Glycoside hydrolase, superfamily; IPR018120: Glycoside hydrolase, family 1, active site	EMQU_0024	27153	28592	-	40.6944	105.004	120.058	72.4955	1.14337	0.690409
	PTS system lactose/cellobiose-specific transporter subunit IIC	KO: K02761: PTS system, cellobiose-specific IIC component; InterPro: IPR003352: Phosphotransferase system, EIIC; IPR004501: Phosphotransferase system, lactose/cellobiose IIC component	EMQU_0025	28626	29936	-	39.5881	231.784	7.5017	66.7977	0.032365	0.288189
	rpiR family phosphosugar-binding transcriptional regulator	InterPro: IPR000281: Helix-turn-helix protein RpiR; IPR001347: Sugar isomerase (SIS); IPR011991: Winged helix-turn-helix transcription repressor DNA-binding	EMQU_0026	30082	30828	-	36.5462	216.085	59.5918	201.346	0.27578	0.931794
	magZ family protein	InterPro: IPR004518: NTP pyrophosphohydrolase MazG, putative catalytic core; IPR011411: NTP Pyrophosphohydrolase MazG-related, Bacilli	EMQU_0027	30916	31233	-	36.7925	142.188	73.2477	68.4568	0.515148	0.481453
	decarboxylase		EMQU_0028	31284	31541	+	43.4109	169.601	6.01881	88.2123	0.035488	0.520115
	decarboxylase	KO: K06966; InterPro: IPR005269: Cytokinin riboside 5'-monophosphate phosphoribohydrolase LOG	EMQU_0029	31556	31864	+	38.1877	113.287	5.02541	70.4507	0.04436	0.621877
	conserved hypothetical protein	InterPro: IPR013216: Methyltransferase type 11	EMQU_0030	32311	33138	+	36.9565	102.17	64.3896	69.3136	0.630217	0.678412
	ABC superfamily ATP binding cassette transporter, membrane protein	InterPro: IPR003439: ABC transporter-like; IPR003593: ATPase, AAA+ type, core; IPR011527: ABC transporter, transmembrane domain, type 1; IPR017871: ABC transporter, conserved site; IPR017940: ABC transporter, integral membrane type 1	EMQU_0031	33260	34855	-	33.8346	53.9196	0	63.5495	0	1.1786
	radical SAM protein	InterPro: IPR006638: Elongator protein 3/MiaB/NifB; IPR007197: Radical SAM; IPR023885: 4Fe4S-binding SPASM domain	EMQU_0032	35524	36576	+	36.1823	98.3462	13.7638	72.8273	0.139953	0.74052
	hypothetical protein		EMQU_0033	36594	36857	+	31.4394	36.8326	41.1741	14.9926	1.11787	0.407047
	ABC transporter ATP-binding protein	KO: K02071: D-methionine transport system ATP-binding protein; InterPro: IPR003439: ABC transporter-like; IPR003593: ATPase, AAA+ type, core; IPR017871: ABC transporter, conserved site	EMQU_0034	37554	38297	+	37.3656	356.801	64.0064	47.8796	0.17939	0.134191
	ABC transporter permease	KO: K02072: D-methionine transport system permease protein; InterPro: IPR000515: Binding-protein-dependent transport systems inner membrane component	EMQU_0035	38272	38943	+	42.1131	390.689	184.863	181.116	0.473173	0.463581
	yaeC family lipoprotein	KO: K02073: D-methionine transport system substrate-binding protein; InterPro: IPR004872: NLPA lipoprotein	EMQU_0036	38954	39769	+	36.3971	578.543	541.722	240.102	0.936356	0.415012
	polysaccharide degrading enzyme	InterPro: IPR003305: Carbohydrate-binding, CenC-like; IPR008979: Galactose-binding domain-like	EMQU_0037	40124	41290	+	37.7892	73.3244	3.99191	80.1276	0.0544418	1.09278
	hypothetical protein		EMQU_0038	41754	42020	+	37.0787	74.6585	31.0183	29.6483	0.415469	0.397119
	resolvase family site-specific recombinase	InterPro: IPR006118: Recombinase, conserved site; IPR006119: Resolvase, N-terminal; IPR009057: Homeodomain-like; IPR012287: Homeodomain-related	EMQU_0039	42587	43165	+	33.3333	104.124	42.0173	53.8335	0.403533	0.517015
	hypothetical membrane protein	InterPro: IPR001899: Surface protein from Gram-positive cocci; IPR019931: LPXTG-motif cell wall anchor	EMQU_0040	43456	43818	+	36.9146	551.82	171.113	840.949	0.310089	1.52396
	hypothetical protein		EMQU_0041	43830	44621	+	43.5606	651.937	254.234	284.235	0.389967	0.435985
	hypothetical protein	InterPro: IPR010317: Protein of unknown function DUF916, cell surface putative; IPR021759: Domain of unknown function DUF3324, C-terminal	EMQU_0042	44723	45778	+	40.0568	549.266	119.111	303.6	0.216854	0.552738
	wxL domain surface protein		EMQU_0043	45780	48782	+	39.7269	314.089	89.8031	218.793	0.285916	0.696596
tspO	transcriptional regulator TspO	KO: K07185; InterPro: IPR004307: TspO/MBR-related protein	EMQU_0044	49185	49655	+	30.7856	397.417	28.5734	356.098	0.0718977	0.896032
agrA_1	accessory gene regulator protein A	KO: K07707: two-component system, AgrA family, response regulator AgrA; InterPro: IPR001789: Signal transduction response regulator, receiver domain; IPR007492: LytTr, DNA-binding domain; IPR011006: CheY-like superfamily	EMQU_0045	49807	50535	-	29.6296	75.3629	0.710038	49.5435	0.00942158	0.657399
agrC_1	accessory gene regulator C	KO: K07706: two-component system, AgrA family, sensor histidine kinase AgrC [EC:2.7.13.-]; InterPro: IPR003594: ATPase-like, ATP-binding domain	EMQU_0046	50550	51830	-	29.274	29.6041	2.82851	12.3592	0.0955445	0.417484
	hypothetical protein		EMQU_0047	52124	52255	+	34.0909	73.6652	145.09	71.2149	1.96958	0.966736
	araC family transcriptional regulator	InterPro: IPR003313: Transcription regulator HTH, AraC, arabinose-binding/dimerisation; IPR009057: Homeodomain-like; IPR012287: Homeodomain-related; IPR014710: RmlC-like jelly roll fold; IPR018060: Helix-turn-helix, AraC type, DNA binding; IPR018062: Helix-turn-helix, AraC type, subdomain 2; IPR020449: Transcription regulator HTH, AraC- type	EMQU_0048	52992	53930	-	36.6347	60.5796	4.96119	74.8193	0.0818953	1.23506
	family 1 extracellular solute-binding protein	KO: K10117: multiple sugar transport system substrate-binding protein; InterPro: IPR006059: Bacterial extracellular solute-binding, family 1	EMQU_0049	54044	55324	+	42.4668	252.394	128.091	120.503	0.507505	0.477438
	ABC transporter permease	KO: K10118: multiple sugar transport system permease protein; InterPro: IPR000515: Binding-protein-dependent transport systems inner membrane component	EMQU_0050	55372	56238	+	40.0231	130.66	128.36	42.2283	0.982392	0.323192
	ABC superfamily ATP binding cassette transporter, membrane protein	KO: K10119: multiple sugar transport system permease protein; InterPro: IPR000515: Binding-protein-dependent transport systems inner membrane component	EMQU_0051	56235	57074	+	39.1667	81.6105	73.3291	64.2005	0.898525	0.786669
	glycosyl hydrolases family 31 family protein	KO: K01811; InterPro: IPR000322: Glycoside hydrolase, family 31; IPR011013: Glycoside hydrolase-type carbohydrate-binding; IPR013785: Aldolase-type TIM barrel; IPR017853: Glycoside hydrolase, superfamily	EMQU_0052	57086	59347	+	41.9982	130.683	40.732	47.682	0.311687	0.364869
	phage integrase family site specific recombinase	InterPro: IPR002104: Integrase, catalytic; IPR011010: DNA breaking-rejoining enzyme, catalytic core; IPR013762: Integrase-like, catalytic core	EMQU_0053	59810	60295	+	31.893	52.0204	18.106	20.3603	0.348055	0.391391
	hypothetical protein		EMQU_0054	60347	60538	+	39.0625	156.999	48.5266	30.9222	0.309089	0.196958
	hypothetical protein		EMQU_0055	60641	60805	-	26.0606	70.7186	3.13707	11.9941	0.04436	0.169603
	thioredoxin domain-containing protein	InterPro: IPR012336: Thioredoxin-like fold; IPR013766: Thioredoxin domain	EMQU_0056	60798	61094	-	35.0168	106.405	43.5705	153.258	0.409477	1.44032
	conserved hypothetical protein	InterPro: IPR000727: Target SNARE coiled-coil domain	EMQU_0057	61258	62103	-	31.4421	63.791	17.7434	77.7808	0.278149	1.21931
	transcriptional regulator	InterPro: IPR001387: Helix-turn-helix type 3; IPR010982: Lambda repressor-like, DNA-binding	EMQU_0058	62403	63302	+	27.7778	76.7101	47.1607	64.868	0.614792	0.845626
guaA	GMP synthase	KO: K01951: GMP synthase (glutamine-hydrolysing) [EC:6.3.5.2]; InterPro: IPR001674: GMP synthase, C-terminal; IPR004739: GMP synthase, N-terminal; IPR014729: Rossmann-like alpha/beta/alpha sandwich fold; IPR017926: Glutamine amidotransferase type 1; IPR022310: NAD/GMP synthase; IPR022955: GMP synthase	EMQU_0059	63630	65195	-	43.4227	1161.77	717.591	832.491	0.617673	0.716574
	pantothenate kinase	KO: K00867: type I pantothenate kinase [EC:2.7.1.33]; InterPro: IPR004566: Bacterial pantothenate kinase; IPR006083: Phosphoribulokinase/uridine kinase	EMQU_0060	65254	66177	-	37.987	468.827	416.783	248.449	0.888992	0.529938
	lysR family transcriptional regulator	InterPro: IPR000847: Transcription regulator HTH, LysR; IPR005119: LysR, substrate-binding; IPR011991: Winged helix-turn-helix transcription repressor DNA-binding	EMQU_0061	66547	67473	-	35.7066	92.8325	75.9395	88.5971	0.818028	0.954376
rsmC	methyltransferase	KO: K00564; InterPro: IPR007848: Methyltransferase small	EMQU_0062	68378	68983	+	42.7393	305.674	12.8123	307.794	0.0419149	1.00693
	transcriptional regulator	KO: K02529; InterPro: IPR000843: Transcription regulator HTH, LacI; IPR001761: Periplasmic binding protein/LacI transcriptional regulator; IPR010982: Lambda repressor-like, DNA-binding	EMQU_0063	69487	70503	+	39.823	152.502	22.9034	108	0.150184	0.708185
pdp	pyrimidine-nucleoside phosphorylase	KO: K00756: pyrimidine-nucleoside phosphorylase [EC:2.4.2.2]; InterPro: IPR000053: Pyrimidine-nucleoside phosphorylase; IPR000312: Glycosyl transferase, family 3; IPR013102: Pyrimidine nucleoside phosphorylase, C-terminal; IPR017459: Glycosyl transferase, family 3, N-terminal; IPR017872: Pyrimidine-nucleoside phosphorylase, conserved site; IPR018090: Pyrimidine-nucleoside phosphorylase, bacterial…	EMQU_0064	70645	71946	+	44.3164	502.621	233.763	283.098	0.465087	0.563243
	deoxyribose-phosphate aldolase	KO: K01619: deoxyribose-phosphate aldolase [EC:4.1.2.4]; InterPro: IPR002915: Deoxyribose-phosphate aldolase/phospho-2-dehydro-3-deoxyheptonate aldolase; IPR011343: Deoxyribose-phosphate aldolase; IPR013785: Aldolase-type TIM barrel; IPR022979: Deoxyribose-phosphate aldolase, type 1	EMQU_0065	71960	72622	+	43.5897	635.788	315.411	423.117	0.496095	0.665501
	cytidine deaminase	KO: K01489: cytidine deaminase [EC:3.5.4.5]; InterPro: IPR002125: CMP/dCMP deaminase, zinc-binding; IPR006262: Cytidine deaminase, homotetrameric; IPR016193: Cytidine deaminase-like	EMQU_0066	72641	73039	+	40.8521	684.81	237.403	266.598	0.346671	0.389302
	hypothetical protein	KO: K07335; InterPro: IPR003760: Basic membrane lipoprotein	EMQU_0067	73103	74188	+	41.8969	1056.55	428.011	815.937	0.405104	0.772268
	ABC transporter ATP-binding protein	KO: K02056; InterPro: IPR003439: ABC transporter-like; IPR003593: ATPase, AAA+ type, core; IPR017871: ABC transporter, conserved site	EMQU_0068	74437	75999	+	40.563	368.92	128.162	219.364	0.347399	0.594611
	ABC transporter permease	KO: K02057; InterPro: IPR001851: ABC transporter, permease	EMQU_0069	75992	77125	+	41.2698	293.686	146.978	268.32	0.500458	0.913627
	ABC transporter permease	KO: K02057; InterPro: IPR001851: ABC transporter, permease	EMQU_0070	77125	78081	+	41.4838	308.378	192.011	229.542	0.622647	0.744353
	phosphopentomutase	KO: K01839: phosphopentomutase [EC:5.4.2.7]; InterPro: IPR006124: Metalloenzyme; IPR010045: Phosphopentomutase; IPR017849: Alkaline phosphatase-like, alpha/beta/alpha; IPR017850: Alkaline-phosphatase-like, core domain; IPR024052: Phosphopentomutase DeoB cap domain	EMQU_0071	78176	79342	+	40.4456	249.136	364.151	227.24	1.46165	0.912112
	purine nucleoside phosphorylase	KO: K03783: purine-nucleoside phosphorylase [EC:2.4.2.1]; InterPro: IPR000845: Nucleoside phosphorylase domain; IPR001369: Purine phosphorylase, family 2; IPR011268: Inosine guanosine/xanthosine phosphorylase; IPR011270: Purine nucleoside phosphorylase I, inosine/guanosine-specific; IPR018099: Purine phosphorylase, family 2, conserved site	EMQU_0072	79428	80243	+	43.1373	264.545	255.637	89.1288	0.966328	0.336914
	purine nucleoside phosphorylase	KO: K03784: purine-nucleoside phosphorylase [EC:2.4.2.1]; InterPro: IPR000845: Nucleoside phosphorylase domain; IPR004402: Purine nucleoside phosphorylase; IPR018017: Nucleoside phosphorylase	EMQU_0073	80267	80974	+	42.3729	274.684	309.254	54.507	1.12586	0.198435
	hypothetical protein		EMQU_0074	81612	81806	+	31.7949	47.3724	76.979	17.7605	1.62498	0.374912
	hypothetical protein		EMQU_0075	82327	82959	-	38.3886	168.976	87.4961	42.2067	0.517802	0.249779
	luxR family DNA-binding response regulator	InterPro: IPR000792: Transcription regulator LuxR, C-terminal; IPR001789: Signal transduction response regulator, receiver domain; IPR011006: CheY-like superfamily; IPR011991: Winged helix-turn-helix transcription repressor DNA-binding; IPR016032: Signal transduction response regulator, C-terminal effector	EMQU_0076	83451	84041	+	32.4873	100.364	0	97.1094	0	0.967571
gpmA	phosphoglycerate mutase	KO: K01834: 2,3-bisphosphoglycerate-dependent phosphoglycerate mutase [EC:5.4.2.1]; InterPro: IPR005952: Phosphoglycerate mutase 1; IPR013078: Histidine phosphatase superfamily, clade-1	EMQU_0077	84417	85103	-	39.1557	2093.38	1191.95	1405.77	0.569391	0.671531
	resolvase family site-specific recombinase	InterPro: IPR006119: Resolvase, N-terminal; IPR012287: Homeodomain-related	EMQU_0078	85380	85964	-	37.9487	361.526	140.686	242.726	0.389144	0.671393
	ribose-5-phosphate isomerase A	KO: K01807: ribose 5-phosphate isomerase A [EC:5.3.1.6]; InterPro: IPR004788: Ribose 5-phosphate isomerase, type A; IPR020672: Ribose-5-phosphate isomerase, type A, subgroup	EMQU_0079	86076	86759	-	41.6667	356.824	104.432	203.978	0.29267	0.57165
rpsL	30S ribosomal protein S12	KO: K02950: small subunit ribosomal protein S12; InterPro: IPR005679: Ribosomal protein S12, bacteria; IPR006032: Ribosomal protein S12/S23; IPR012340: Nucleic acid-binding, OB-fold; IPR016027: Nucleic acid-binding, OB-fold-like	EMQU_0080	87066	87479	+	40.0966	4592.97	3086.95	4260.4	0.672103	0.92759
	30S ribosomal protein S7	KO: K02992: small subunit ribosomal protein S7; InterPro: IPR000235: Ribosomal protein S7; IPR005717: Ribosomal protein S7, bacterial-type; IPR020606: Ribosomal protein S7, conserved site; IPR023798: Ribosomal protein S7 domain	EMQU_0081	87571	88041	+	42.6752	6404.09	4509.1	5237.48	0.704096	0.817834
	elongation factor G	KO: K02355; InterPro: IPR000640: Translation elongation factor EFG/EF2, C-terminal; IPR000795: Protein synthesis factor, GTP-binding; IPR004161: Translation elongation factor EFTu/EF1A, domain 2; IPR004540: Translation elongation factor EFG/EF2; IPR005225: Small GTP-binding protein domain; IPR005517: Translation elongation factor EFG/EF2, domain IV; IPR009000: Translation elongation/initiation fa…	EMQU_0082	88120	90204	+	42.1583	7900.77	4913.52	7812.63	0.621904	0.988845
	elongation factor Tu	KO: K02358: elongation factor Tu; InterPro: IPR000795: Protein synthesis factor, GTP-binding; IPR004160: Translation elongation factor EFTu/EF1A, C-terminal; IPR004161: Translation elongation factor EFTu/EF1A, domain 2; IPR004541: Translation elongation factor EFTu/EF1A, bacterial/organelle; IPR005225: Small GTP-binding protein domain; IPR009000: Translation elongation/initiation factor/Ribosomal…	EMQU_0083	90377	91564	+	43.3502	12854.6	9369.83	13313	0.72891	1.03566
rpsJ	30S ribosomal protein S10	KO: K02946: small subunit ribosomal protein S10; InterPro: IPR001848: Ribosomal protein S10; IPR005731: Ribosomal protein S10 subgroup; IPR018268: Ribosomal protein S10, conserved site	EMQU_0084	92062	92370	+	38.835	2784.97	1093.86	1766.07	0.392774	0.634142
rplC	50S ribosomal protein L3	KO: K02906: large subunit ribosomal protein L3; InterPro: IPR000597: Ribosomal protein L3; IPR009000: Translation elongation/initiation factor/Ribosomal, beta-barrel; IPR019926: Ribosomal protein L3, conserved site; IPR019927: Ribosomal protein L3, bacterial/organelle-type	EMQU_0085	92402	93031	+	41.5873	2459.51	1470.69	2864.87	0.597962	1.16482
rplD	50S ribosomal protein L4	KO: K02926: large subunit ribosomal protein L4; InterPro: IPR002136: Ribosomal protein L4/L1e; IPR013005: Ribosomal protein L4/L1e, bacterial-type; IPR023574: Ribosomal protein L4 domain	EMQU_0086	93059	93682	+	40.3846	2361.61	1441.7	2274.77	0.610473	0.963228
rplW	50S ribosomal protein L23	KO: K02892: large subunit ribosomal protein L23; InterPro: IPR001014: Ribosomal protein L23/L25, conserved site; IPR012677: Nucleotide-binding, alpha-beta plait; IPR012678: Ribosomal protein L23/L15e core domain; IPR013025: Ribosomal protein L25/L23	EMQU_0087	93682	93972	+	38.488	3154.39	2029.56	2953.23	0.643407	0.936229
rplB	50S ribosomal protein L2	KO: K02886: large subunit ribosomal protein L2; InterPro: IPR002171: Ribosomal protein L2; IPR005880: Ribosomal protein L2, bacterial-type; IPR008991: Translation protein SH3-like; IPR012340: Nucleic acid-binding, OB-fold; IPR014722: Translation protein SH3-like, subgroup; IPR014726: Ribosomal protein L2, domain 3; IPR016027: Nucleic acid-binding, OB-fold-like; IPR022666: Ribosomal Proteins L2, R…	EMQU_0088	94011	94841	+	42.84	4062.12	1919.11	3567.48	0.47244	0.878232
rpsS	30S ribosomal protein S19	KO: K02965: small subunit ribosomal protein S19; InterPro: IPR002222: Ribosomal protein S19/S15; IPR005732: Ribosomal protein S19, bacterial-type; IPR020934: Ribosomal protein S19 conserved site; IPR023575: Ribosomal protein S19, superfamily	EMQU_0089	94884	95162	+	41.5771	4081.21	1281.98	3207.93	0.314119	0.786025
rplV	50S ribosomal protein L22	KO: K02890: large subunit ribosomal protein L22; InterPro: IPR001063: Ribosomal protein L22/L17; IPR005727: Ribosomal protein L22, bacterial-type; IPR018260: Ribosomal protein L22/L17, conserved site	EMQU_0090	95185	95532	+	39.0805	3733.05	858.233	3682.23	0.229901	0.986388
rpsC	30S ribosomal protein S3	KO: K02982: small subunit ribosomal protein S3; InterPro: IPR001351: Ribosomal protein S3, C-terminal; IPR004044: K Homology, type 2; IPR004087: K Homology; IPR004088: K Homology, type 1; IPR005704: Ribosomal protein S3, bacterial; IPR008282: Ribosomal protein S3, N-terminal; IPR009019: K Homology, prokaryotic type; IPR015946: K homology domain-like, alpha/beta; IPR018280: Ribosomal protein S3, c…	EMQU_0091	95546	96202	+	40.6393	4144.83	924.936	3610.89	0.223154	0.871179
rplP	50S ribosomal protein L16	KO: K02878: large subunit ribosomal protein L16; InterPro: IPR000114: Ribosomal protein L16; IPR016180: Ribosomal protein L10e/L16; IPR020798: Ribosomal protein L16, conserved site	EMQU_0092	96205	96639	+	42.5287	3978.94	579.493	3484.9	0.14564	0.875837
	50S ribosomal protein L29	KO: K02904: large subunit ribosomal protein L29; InterPro: IPR001854: Ribosomal protein L29; IPR018254: Ribosomal protein L29, conserved site	EMQU_0093	96629	96817	+	32.8042	3305.58	758.624	4070.61	0.229498	1.23144
rpsQ	30S ribosomal protein S17	KO: K02961: small subunit ribosomal protein S17; InterPro: IPR000266: Ribosomal protein S17; IPR012340: Nucleic acid-binding, OB-fold; IPR016027: Nucleic acid-binding, OB-fold-like; IPR019979: Ribosomal protein S17, conserved site; IPR019984: Ribosomal protein S17, bacterial-type	EMQU_0094	96842	97108	+	36.7041	3700.15	633.936	3668.98	0.171327	0.991576
rplN	50S ribosomal protein L14	KO: K02874: large subunit ribosomal protein L14; InterPro: IPR000218: Ribosomal protein L14b/L23e; IPR005745: Ribosomal protein L14, bacterial-type; IPR019972: Ribosomal protein L14 conserved site; IPR023571: Ribosomal protein L14 domain	EMQU_0095	97166	97534	+	43.9024	5352.05	1332.62	4522.52	0.248992	0.845008
rplX	50S ribosomal protein L24	KO: K02895: large subunit ribosomal protein L24; InterPro: IPR003256: Ribosomal protein L24; IPR005824: KOW; IPR005825: Ribosomal protein L24/L26, conserved site; IPR008991: Translation protein SH3-like; IPR014723: Ribosomal protein L24, SH3-like	EMQU_0096	97571	97879	+	39.8058	4816.28	966.554	3926.02	0.200685	0.815158
rplE	50S ribosomal protein L5	KO: K02931: large subunit ribosomal protein L5; InterPro: IPR002132: Ribosomal protein L5; IPR020929: Ribosomal protein L5, conserved site; IPR022803: Ribosomal protein L5 domain	EMQU_0097	97908	98447	+	36.4815	4416.23	740.001	3735.41	0.167564	0.845836
rpsN	30S ribosomal protein S14	KO: K02954: small subunit ribosomal protein S14; InterPro: IPR001209: Ribosomal protein S14; IPR018271: Ribosomal protein S14, conserved site	EMQU_0098	98466	98651	+	43.0108	4961.23	673.459	5974.31	0.135744	1.2042
rpsH	30S ribosomal protein S8	KO: K02994: small subunit ribosomal protein S8; InterPro: IPR000630: Ribosomal protein S8	EMQU_0099	98688	99086	+	39.3484	4791.23	1179.23	5932.11	0.246123	1.23812
rplF	50S ribosomal protein L6	KO: K02933: large subunit ribosomal protein L6; InterPro: IPR000702: Ribosomal protein L6; IPR002358: Ribosomal protein L6, conserved site; IPR019906: Ribosomal protein L6, bacterial-type; IPR020040: Ribosomal protein L6, alpha-beta domain	EMQU_0100	99118	99654	+	41.1546	4284.27	830.887	4837	0.193939	1.12901
rplR	50S ribosomal protein L18	KO: K02881: large subunit ribosomal protein L18; InterPro: IPR004389: Ribosomal protein L18, bacterial; IPR005484: Ribosomal protein L18/L5	EMQU_0101	99819	100175	+	44.2577	5047.12	577.064	4595.55	0.114335	0.910529
rpsE	30S ribosomal protein S5	KO: K02988: small subunit ribosomal protein S5; InterPro: IPR000851: Ribosomal protein S5; IPR005324: Ribosomal protein S5, C-terminal; IPR005712: Ribosomal protein S5, bacterial-type; IPR013810: Ribosomal protein S5, N-terminal; IPR014720: Double-stranded RNA-binding-like; IPR014721: Ribosomal protein S5 domain 2-type fold, subgroup; IPR018192: Ribosomal protein S5, N-terminal, conserved site; I…	EMQU_0102	100196	100696	+	42.1158	4661.99	848.231	4585.13	0.181946	0.983513
	50S ribosomal protein L30	KO: K02907: large subunit ribosomal protein L30; InterPro: IPR005996: Ribosomal protein L30, bacterial-type; IPR016082: Ribosomal protein L30, ferredoxin-like fold domain; IPR018038: Ribosomal protein L30, conserved site	EMQU_0103	100711	100890	+	37.7778	3803.09	900.079	3820.61	0.23667	1.00461
rplO	50S ribosomal protein L15	KO: K02876: large subunit ribosomal protein L15; InterPro: IPR001196: Ribosomal protein L15, conserved site; IPR005749: Ribosomal protein L15, bacterial-type; IPR021131: Ribosomal protein L18e/L15P	EMQU_0104	100939	101379	+	43.0839	4423.12	946.031	4032.09	0.213883	0.911594
secY	preprotein translocase subunit SecY	KO: K03076: preprotein translocase subunit SecY; InterPro: IPR002208: SecY protein; IPR023201: SecY subunit domain	EMQU_0105	101379	102674	+	39.1204	3865.89	865.891	4112.28	0.223982	1.06373
adk	adenylate kinase	KO: K00939: adenylate kinase [EC:2.7.4.3]; InterPro: IPR000850: Adenylate kinase; IPR006259: Adenylate kinase, subfamily; IPR007862: Adenylate kinase, active site lid domain	EMQU_0106	102734	103381	+	38.5802	2079.06	928.995	2970.83	0.446833	1.42892
infA	initiation factor IF-1	KO: K02518; InterPro: IPR004368: Translation initiation factor IF-1; IPR006196: RNA-binding domain, S1, IF1 type; IPR012340: Nucleic acid-binding, OB-fold; IPR016027: Nucleic acid-binding, OB-fold-like; IPR022967: RNA-binding domain, S1	EMQU_0107	103572	103790	+	38.3562	2521.97	758.699	3585.29	0.300835	1.42162
rpsM	30S ribosomal protein S13	KO: K02952: small subunit ribosomal protein S13; InterPro: IPR001892: Ribosomal protein S13; IPR010979: Ribosomal protein S13-like, H2TH; IPR018269: Ribosomal protein S13, conserved site; IPR019980: Ribosomal protein S13, bacterial-type	EMQU_0108	103957	104322	+	42.0765	3185.48	1158.27	2629.24	0.363611	0.825382
rpsK	30S ribosomal protein S11	KO: K02948: small subunit ribosomal protein S11; InterPro: IPR001971: Ribosomal protein S11; IPR018102: Ribosomal S11, conserved site; IPR019981: Ribosomal protein S11, bacterial-type	EMQU_0109	104350	104739	+	42.8205	3424.53	1582.05	3083.98	0.461977	0.900556
rpoA	rpoA	KO: K03040: DNA-directed RNA polymerase subunit alpha [EC:2.7.7.6]; InterPro: IPR009025: DNA-directed RNA polymerase, RBP11-like; IPR011260: RNA polymerase, alpha subunit, C-terminal; IPR011261: DNA-directed RNA polymerase, dimerisation; IPR011262: DNA-directed RNA polymerase, insert domain; IPR011263: DNA-directed RNA polymerase, RpoA/D/Rpb3-type; IPR011773: DNA-directed RNA polymerase, alpha su…	EMQU_0110	104819	105757	+	37.2737	2623.05	1133.91	2212.44	0.432286	0.843461
rplQ	50S ribosomal protein L17	KO: K02879: large subunit ribosomal protein L17; InterPro: IPR000456: Ribosomal protein L17	EMQU_0111	105784	106164	+	43.0446	2989.88	1099.09	2175.11	0.367603	0.72749
	cobalt ABC superfamily ATP binding cassette transporter, ABC protein	KO: K02006: cobalt/nickel transport system ATP-binding protein; InterPro: IPR003439: ABC transporter-like; IPR003593: ATPase, AAA+ type, core; IPR015856: ABC transporter, cobalt import, CbiO; IPR017871: ABC transporter, conserved site; IPR022112: Cobalt ATP-binding cassette C-terminal	EMQU_0112	106433	107272	+	40.7143	350.173	68.3994	232.064	0.19533	0.662713
cbiO2	cobalt transporter ATP-binding subunit	KO: K02006: cobalt/nickel transport system ATP-binding protein; InterPro: IPR003439: ABC transporter-like; IPR003593: ATPase, AAA+ type, core; IPR015856: ABC transporter, cobalt import, CbiO; IPR017871: ABC transporter, conserved site; IPR022112: Cobalt ATP-binding cassette C-terminal	EMQU_0113	107248	108117	+	42.7586	370.511	249.289	110.894	0.672826	0.299299
	cobalt transport family protein	KO: K02008: cobalt/nickel transport system permease protein; InterPro: IPR003339: ABC/ECF transporter, transmembrane component; IPR024919: ECF transporter transmembrane protein EcfT	EMQU_0114	108107	108904	+	40.4762	340.577	261.403	199.638	0.76753	0.586177
truA	tRNA-pseudouridine synthase I	KO: K06173; InterPro: IPR001406: Pseudouridine synthase I, TruA; IPR020094: Pseudouridine synthase I, TruA, N-terminal; IPR020095: Pseudouridine synthase I, TruA, C-terminal; IPR020097: Pseudouridine synthase I, TruA, alpha/beta domain; IPR020103: Pseudouridine synthase, catalytic domain	EMQU_0115	108940	109686	+	40.9639	339.748	350.622	152.334	1.03201	0.448375
yfhO	bacterial membrane protein YfhO	InterPro: IPR018580: Uncharacterised protein family YfhO	EMQU_0116	109730	112402	-	39.9177	174.614	109.991	110.871	0.629911	0.634951
rpmB	50S ribosomal protein L28	KO: K02902: large subunit ribosomal protein L28; InterPro: IPR001383: Ribosomal protein L28	EMQU_0117	112849	113037	-	38.6243	563.364	71.2066	458.107	0.126396	0.813164
	hypothetical protein	InterPro: IPR005531: Alkaline shock protein Asp23	EMQU_0118	113309	113671	+	38.0165	917.467	581.785	444.326	0.634121	0.484297
dhaK	glycerone kinase	KO: K07030; InterPro: IPR004007: Dak phosphatase; IPR019986: DAK2 domain-containing protein YloV	EMQU_0119	113723	115405	+	42.7213	1186.15	871.615	770.208	0.734824	0.649332
recG	DNA helicase RecG	KO: K03655: ATP-dependent DNA helicase RecG [EC:3.6.4.12]; InterPro: IPR001650: Helicase, C-terminal; IPR004609: DNA helicase, ATP-dependent, RecG; IPR011545: DNA/RNA helicase, DEAD/DEAH box type, N-terminal; IPR014001: DEAD-like helicase; IPR016027: Nucleic acid-binding, OB-fold-like	EMQU_0120	115515	117551	+	41.8753	402.175	309.757	472.41	0.770205	1.17464
plsX	fatty acid/phospholipid synthesis protein PlsX	KO: K03621: glycerol-3-phosphate acyltransferase PlsX [EC:2.3.1.15]; InterPro: IPR003664: Fatty acid synthesis PlsX protein; IPR012281: Phospholipid biosynthesis protein, PlsX-like	EMQU_0121	117598	118599	+	41.2176	582.749	358.509	475.499	0.615204	0.815958
acpP_1	acyl carrier protein	KO: K02078; InterPro: IPR003231: Acyl carrier protein (ACP); IPR006163: Phosphopantetheine-binding; IPR009081: Acyl carrier protein-like	EMQU_0122	118719	118961	+	35.8025	824.323	336.558	466.251	0.408284	0.565617
	peptide ABC transporter ATP-binding protein	KO: K02031; InterPro: IPR003439: ABC transporter-like; IPR003593: ATPase, AAA+ type, core; IPR010066: Oligopeptide/dipeptide ABC transporter, ATP-binding protein, C-terminal; IPR013563: Oligopeptide/dipeptide ABC transporter, C-terminal; IPR017871: ABC transporter, conserved site	EMQU_0123	119548	120552	+	40.597	2570.28	1616.2	3212.22	0.628804	1.24976
oppF	oligopeptide ABC superfamily ATP binding cassette transporter, ABC protein	KO: K02032; InterPro: IPR003439: ABC transporter-like; IPR003593: ATPase, AAA+ type, core; IPR013563: Oligopeptide/dipeptide ABC transporter, C-terminal; IPR017871: ABC transporter, conserved site	EMQU_0124	120553	121497	+	40.1058	2960.87	3028.47	4261.71	1.02283	1.43934
	oligopeptide ABC superfamily ATP binding cassette transporter, membrane protein	KO: K02033; InterPro: IPR000515: Binding-protein-dependent transport systems inner membrane component	EMQU_0125	121497	122459	+	40.1869	3186.24	3157.3	4873.06	0.990919	1.52941
	peptide/nickel transport system permease protein	KO: K02034; InterPro: IPR000515: Binding-protein-dependent transport systems inner membrane component	EMQU_0126	122488	123402	+	37.4863	3742.87	3519.23	5977.08	0.94025	1.59693
	oligopeptide ABC superfamily ATP binding cassette transporter, binding protein	KO: K02035; InterPro: IPR000914: Bacterial extracellular solute-binding protein, family 5; IPR023765: Bacterial extracellular solute-binding protein, family 5, conserved site	EMQU_0127	123428	125209	+	38.7205	4968.31	5858.2	6520.12	1.17911	1.31234
	hypothetical protein HMPREF0352_0706		EMQU_0128	125517	125900	+	39.3229	37.9836	10.7837	39.9412	0.283904	1.05154
	predicted protein	InterPro: IPR006541: Bacteriocin-associated integral membrane protein	EMQU_0129	126073	128046	+	34.6505	55.1706	20.7152	55.8919	0.375475	1.01307
macB2	macrolide-specific efflux protein MacB	KO: K02003; InterPro: IPR003439: ABC transporter-like; IPR003593: ATPase, AAA+ type, core; IPR017871: ABC transporter, conserved site	EMQU_0130	128039	128665	+	37.799	158.962	8.25546	292.75	0.0519336	1.84164
	hypothetical protein		EMQU_0131	128679	128843	+	35.7576	41.2525	0	41.9793	0	1.01762
	hypothetical protein		EMQU_0132	129274	129948	-	37.7778	94.357	115.793	48.3761	1.22718	0.512693
	transcriptional regulator	InterPro: IPR001387: Helix-turn-helix type 3; IPR010057: Transcription activator MutR, C-terminal; IPR010982: Lambda repressor-like, DNA-binding	EMQU_0133	130380	131234	+	29.7076	39.2364	16.9512	34.7197	0.432027	0.884885
	ribonuclease III	KO: K03685: ribonuclease III [EC:3.1.26.3]; InterPro: IPR000999: Ribonuclease III; IPR001159: Double-stranded RNA-binding; IPR011907: Ribonuclease III, bacterial; IPR014720: Double-stranded RNA-binding-like	EMQU_0134	131697	132389	+	40.5483	412.525	234.534	176.342	0.568532	0.427468
	chromosome partition protein SMC	KO: K03529; InterPro: IPR003395: RecF/RecN/SMC; IPR010935: SMCs flexible hinge; IPR011890: Structural maintenance of chromosomes protein, prokaryotic	EMQU_0135	132402	135983	+	41.7644	722.228	476	455.391	0.659072	0.630536
	haloacid dehalogenase (HAD) superfamily hydrolase	KO: K07024; InterPro: IPR000150: Cof protein; IPR006379: HAD-superfamily hydrolase, subfamily IIB; IPR013200: HAD superfamily hydrolase-like, type 3; IPR023214: HAD-like domain	EMQU_0136	135992	136801	+	39.5062	745.492	401.313	448.334	0.53832	0.601394
ftsY	signal recognition particle-docking protein FtsY	KO: K03110: fused signal recognition particle receptor; InterPro: IPR000897: Signal recognition particle, SRP54 subunit, GTPase; IPR003593: ATPase, AAA+ type, core; IPR004390: Cell division transporter substrate-binding protein FtsY; IPR013822: Signal recognition particle, SRP54 subunit, helical bundle	EMQU_0137	136814	137812	+	42.2422	851.685	355.441	368.467	0.417338	0.432633
	bifunctional glutamate--cysteine ligase/glutathione synthetase	KO: K01919: glutamate--cysteine ligase [EC:6.3.2.2]; InterPro: IPR003806: ATP-grasp fold, DUF201-type; IPR006335: Glutamate--cysteine ligase-related; IPR007370: Glutamate--cysteine ligase; IPR011761: ATP-grasp fold; IPR013815: ATP-grasp fold, subdomain 1; IPR013816: ATP-grasp fold, subdomain 2	EMQU_0138	138212	140497	+	40.7699	391.547	422.743	279.626	1.07967	0.714156
	hypothetical protein	InterPro: IPR012543: Protein of unknown function DUF1694	EMQU_0139	140640	141080	-	39.6825	128.989	34.0383	34.7788	0.263885	0.269625
	iron ABC transporter permease	KO: K02015: iron complex transport system permease protein; InterPro: IPR000522: ABC transporter, permease protein	EMQU_0140	141464	142414	+	39.8528	97.1358	75.1117	101.448	0.773264	1.0444
	iron ABC transporter permease	KO: K02015: iron complex transport system permease protein; InterPro: IPR000522: ABC transporter, permease protein	EMQU_0141	142407	143366	+	41.3542	159.531	33.4295	79.3671	0.209548	0.497502
fetC	ferric (Fe+3) ABC superfamily ATP binding cassette transporter, ABC protein	KO: K02013: iron complex transport system ATP-binding protein [EC:3.6.3.34]; InterPro: IPR003439: ABC transporter-like; IPR003593: ATPase, AAA+ type, core	EMQU_0142	143363	144118	+	39.6825	95.1801	0	17.6699	0	0.185646
	iron ABC transporter substrate-binding protein	KO: K02016: iron complex transport system substrate-binding protein; InterPro: IPR002491: ABC transporter, periplasmic binding protein	EMQU_0143	144140	145093	+	37.4214	130.976	38.5229	33.7098	0.294122	0.257374
	hypothetical protein		EMQU_0144	145280	145402	-	39.0244	260.883	105.207	120.672	0.403272	0.462553
pheS_1	phenylalanyl-tRNA synthetase subunit alpha chain		EMQU_0145	145470	145766	-	32.3232	139.145	76.6841	76.6288	0.551107	0.550711
	acetyltransferase	InterPro: IPR000182: GCN5-related N-acetyltransferase (GNAT) domain; IPR016181: Acyl-CoA N-acyltransferase	EMQU_0146	145986	146564	+	37.8238	290.539	33.9714	338.382	0.116926	1.16467
	hypothetical protein	InterPro: IPR000361: FeS cluster biogenesis	EMQU_0147	146612	146971	+	38.8889	945.37	835.377	749.005	0.88365	0.792288
	phosphohydrolase	InterPro: IPR004843: Metallophosphoesterase domain; IPR022302: Phosphoesterase, putative	EMQU_0148	146990	147886	+	39.019	775.628	1023.12	410.918	1.31908	0.529787
glpF	glycerol MIP family major intrinsic protein channel protein	KO: K02440; InterPro: IPR000425: Major intrinsic protein; IPR012269: Aquaporin; IPR022357: Major intrinsic protein, conserved site; IPR023271: Aquaporin-like	EMQU_0149	148510	149244	-	41.6327	246.733	65.4944	73.372	0.265446	0.297373
	trans-acting positive regulator	InterPro: IPR007737: M trans-acting positive regulator	EMQU_0150	149678	151207	+	36.9281	163.335	197.236	147.78	1.20756	0.904769
metG	methionine--tRNA ligase	InterPro: IPR021361: Bacteriophage 16-3, p046	EMQU_0151	151197	151418	+	37.8378	378.878	104.922	164.919	0.276929	0.435281
	short-chain dehydrogenase	KO: K00059: 3-oxoacyl-[acyl-carrier protein] reductase [EC:1.1.1.100]; InterPro: IPR002198: Short-chain dehydrogenase/reductase SDR; IPR002347: Glucose/ribitol dehydrogenase; IPR016040: NAD(P)-binding domain; IPR020904: Short-chain dehydrogenase/reductase, conserved site	EMQU_0152	151415	152176	+	45.0131	335.612	232.996	241.534	0.694242	0.719684
	hypothetical protein Clocel_3238		EMQU_0153	152205	152852	+	38.2716	317.374	369.841	106.128	1.16531	0.334394
bioY	biotin synthase	KO: K03523; InterPro: IPR003784: BioY protein	EMQU_0154	152972	153514	-	40.3315	99.387	49.5693	73.8034	0.49875	0.742586
rpsD	30S ribosomal protein S4	KO: K02986: small subunit ribosomal protein S4; InterPro: IPR001912: Ribosomal protein S4/S9, N-terminal; IPR002942: RNA-binding S4; IPR005709: Ribosomal protein S4, bacterial-type; IPR018079: Ribosomal protein S4, conserved site; IPR022801: Ribosomal protein S4/S9	EMQU_0155	154512	155123	-	40.3595	297.116	279.107	177.853	0.939387	0.598598
	formate/nitrite transporter	InterPro: IPR000292: Formate/nitrite transporter	EMQU_0156	155447	156244	+	37.9699	277.214	121.296	125.859	0.437555	0.454014
alkD	DNA alkylation repair protein	InterPro: IPR014825: DNA alkylation repair enzyme; IPR016024: Armadillo-type fold	EMQU_0157	156278	156910	+	38.2306	215.061	33.5266	230.573	0.155894	1.07213
	HAD superfamily hydrolase	KO: K07024; InterPro: IPR000150: Cof protein; IPR006379: HAD-superfamily hydrolase, subfamily IIB; IPR013200: HAD superfamily hydrolase-like, type 3; IPR023214: HAD-like domain	EMQU_0158	156925	157698	+	41.3437	216.713	111.014	74.7887	0.512261	0.345105
	metallophosphoesterase	KO: K09769; InterPro: IPR004843: Metallophosphoesterase domain; IPR005235: Conserved hypothetical protein CHP00282	EMQU_0159	158087	158884	+	43.1078	675.061	249.079	379.437	0.368972	0.562077
	hypothetical protein	InterPro: IPR010368: Uncharacterised protein family UPF0342; IPR016783: Biofilm formation YmcA; IPR023378: YheA/YmcA-like domain	EMQU_0160	158900	159274	+	39.2	435.627	59.3535	449.898	0.136248	1.03276
	DNA mismatch repair protein MutS	KO: K03555: DNA mismatch repair protein MutS; InterPro: IPR000432: DNA mismatch repair protein MutS, C-terminal; IPR005748: DNA mismatch repair protein MutS, type 1; IPR007695: DNA mismatch repair protein MutS-like, N-terminal; IPR007696: DNA mismatch repair protein MutS, core; IPR007860: DNA mismatch repair protein MutS, connector; IPR007861: DNA mismatch repair protein MutS, clamp; IPR016151: D…	EMQU_0161	159258	161876	+	40.0916	666.818	412.671	608.48	0.618866	0.912513
mutL	DNA mismatch repair protein MutL	KO: K03572: DNA mismatch repair protein MutL; InterPro: IPR002099: DNA mismatch repair protein; IPR003594: ATPase-like, ATP-binding domain; IPR013507: DNA mismatch repair protein, C-terminal; IPR014721: Ribosomal protein S5 domain 2-type fold, subgroup; IPR014762: DNA mismatch repair, conserved site; IPR014763: DNA mismatch repair protein, N-terminal; IPR014790: MutL, C-terminal, dimerisation; IP…	EMQU_0162	161894	164002	+	40.5405	799.713	502.155	580.382	0.627919	0.725738
	maf protein	KO: K06287; InterPro: IPR003697: Maf-like protein	EMQU_0163	164031	164594	+	44.1489	848.247	321.216	431.596	0.378683	0.508809
	hypothetical protein		EMQU_0164	164769	165713	+	40.9524	251.07	214.715	182.196	0.855202	0.725678
	methionine sulfoxide reductase B	KO: K07305; InterPro: IPR002579: Methionine sulphoxide reductase B; IPR011057: Mss4-like	EMQU_0165	165837	166283	-	42.2819	385.037	194.541	68.6239	0.505252	0.178227
	gntR family transcriptional regulator	KO: K03486; InterPro: IPR000524: Transcription regulator HTH, GntR; IPR011663: UbiC transcription regulator-associated; IPR011991: Winged helix-turn-helix transcription repressor DNA-binding; IPR012770: Trehalose transcription repressor	EMQU_0166	166793	167506	-	37.9552	219.262	57.2714	57.5136	0.2612	0.262305
	transposase	KO: K07496; InterPro: IPR001959: Transposase, probable, IS891/IS1136/IS1341; IPR010095: Transposase IS605, OrfB, C-terminal; IPR021027: Transposase, putative, helix-turn-helix domain	EMQU_0167	167691	168935	-	36.4659	137.852	101.86	159.355	0.738914	1.15599
	ISSoc2 resolvase	InterPro: IPR006119: Resolvase, N-terminal	EMQU_0168	168913	169287	-	34.6667	151.691	31.7472	274.425	0.209288	1.8091
	PTS system transporter subunit IIBC	KO: K02819: PTS system, trehalose-specific IIC component; InterPro: IPR001127: Phosphotransferase system, sugar-specific permease EIIA 1 domain; IPR001996: Phosphotransferase system, EIIB component, type 1; IPR003352: Phosphotransferase system, EIIC; IPR011055: Duplicated hybrid motif; IPR011296: Phosphotransferase system, trehalose-specific IIBC component; IPR011535: Phosphotransferase system, g…	EMQU_0169	169450	171429	+	41.6667	141.683	100.386	141.93	0.708529	1.00174
ruvA	holliday junction DNA helicase RuvA	KO: K03550: holliday junction DNA helicase RuvA [EC:3.6.4.12]; InterPro: IPR000085: Bacterial DNA recombination protein RuvA; IPR003583: Helix-hairpin-helix DNA-binding motif, class 1; IPR010994: RuvA domain 2-like; IPR011114: DNA helicase, Holliday junction RuvA type, domain III, C-terminal; IPR012340: Nucleic acid-binding, OB-fold; IPR013849: DNA helicase, Holliday junction RuvA type, domain I,…	EMQU_0170	171581	172183	+	39.3035	342.672	218.893	196.918	0.638783	0.574654
ruvB	holliday junction DNA helicase RuvB	KO: K03551: holliday junction DNA helicase RuvB [EC:3.6.4.12]; InterPro: IPR003593: ATPase, AAA+ type, core; IPR004605: DNA helicase, Holliday junction RuvB type; IPR008823: DNA helicase, Holliday junction RuvB type, C-terminal; IPR008824: DNA helicase, Holliday junction RuvB type, N-terminal; IPR011991: Winged helix-turn-helix transcription repressor DNA-binding	EMQU_0171	172196	173197	+	45.8084	306.659	259.325	173.313	0.845647	0.565164
	tetR family transcriptional regulator	InterPro: IPR001647: DNA-binding HTH domain, TetR-type; IPR009057: Homeodomain-like; IPR015893: Tetracycline transcriptional regulator, TetR-like, C-terminal	EMQU_0172	173261	173848	+	37.415	365.47	161.976	228.025	0.443198	0.623924
	low molecular weight protein tyrosine phosphatase	KO: K01104; InterPro: IPR000106: Protein-tyrosine phosphatase/arsenate reductase; IPR017867: Protein-tyrosine phosphatase, low molecular weight; IPR023485: Phosphotyrosine protein phosphatase I superfamily	EMQU_0173	173897	174367	+	38.4289	396.385	260.457	245.802	0.657082	0.620111
	hypothetical protein		EMQU_0174	174499	174873	+	40	539.347	452.743	426.15	0.839427	0.790121
	branched-chain amino acid transport system II carrier protein	KO: K03311; InterPro: IPR004685: Branched-chain amino acid transport system II carrier protein	EMQU_0175	175169	176533	-	38.022	77.648	48.9177	68.1422	0.629993	0.877578
	amino acid ABC superfamily ATP binding cassettetransporter, ABC protein	KO: K02028; InterPro: IPR003439: ABC transporter-like; IPR003593: ATPase, AAA+ type, core; IPR017871: ABC transporter, conserved site	EMQU_0176	176916	177656	-	39.4062	216.522	64.9641	113.507	0.300035	0.524227
	amino acid ABC transporter amino acid-binding/permease protein	KO: K02029; InterPro: IPR000515: Binding-protein-dependent transport systems inner membrane component; IPR001638: Extracellular solute-binding protein, family 3; IPR010065: Amino acid ABC transporter, permease protein, 3-TM domain, His/Glu/Gln/Arg/opine family	EMQU_0177	177669	179264	-	42.5439	187.652	112.54	96.7192	0.599724	0.515417
	hypothetical protein		EMQU_0178	179921	180217	-	36.0269	402.703	266.651	323.174	0.662154	0.802511
	sir2 family transcriptional regulator	KO: K12410: NAD-dependent deacetylase [EC:3.5.1.-]; InterPro: IPR003000: NAD-dependent deacetylase, sirtuin family	EMQU_0179	180394	181110	+	41.7015	480.088	199.25	142.147	0.415029	0.296086
	maltose O-acetyltransferase	KO: K00661; InterPro: IPR001451: Bacterial transferase hexapeptide repeat; IPR002701: Chorismate mutase; IPR011004: Trimeric LpxA-like; IPR011279: Chorismate mutase, Gram-positive; IPR020822: Chorismate mutase, type II; IPR024688: Maltose/galactoside acetyltransferase	EMQU_0180	181107	181943	+	41.2186	427.522	244.894	178.514	0.572822	0.417555
	transcriptional regulator	KO: K07105; InterPro: IPR004173: 3H domain; IPR011991: Winged helix-turn-helix transcription repressor DNA-binding; IPR013196: Helix-turn-helix, type 11	EMQU_0181	181948	182475	+	43.3712	372.009	115.68	355.137	0.310959	0.954646
	hypothetical protein		EMQU_0182	182695	184059	+	36.4103	110.417	30.7158	59.0807	0.27818	0.53507
	hypothetical protein		EMQU_0183	184124	186019	+	34.1772	58.2095	6.00611	58.9741	0.103181	1.01313
	hypothetical protein		EMQU_0184	185989	186852	+	36.6898	69.7773	3.59457	184.961	0.0515148	2.65073
def	peptide deformylase	KO: K01462; InterPro: IPR000181: Formylmethionine deformylase; IPR023635: Peptide deformylase	EMQU_0185	187038	187601	-	40.9574	112.927	125.733	64.0375	1.1134	0.567069
	30S ribosomal protein S15	KO: K02956: small subunit ribosomal protein S15; InterPro: IPR000589: Ribosomal protein S15; IPR005290: Ribosomal protein S15, bacterial-type; IPR009068: S15/NS1, RNA-binding	EMQU_0186	187844	188113	+	38.5185	1548.61	600.053	667.004	0.387479	0.430712
	polynucleotide phosphorylase/polyadenylase	KO: K00962: polyribonucleotide nucleotidyltransferase [EC:2.7.7.8]; InterPro: IPR001247: Exoribonuclease, phosphorolytic domain 1; IPR003029: Ribosomal protein S1, RNA-binding domain; IPR004087: K Homology; IPR004088: K Homology, type 1; IPR012162: Polyribonucleotide nucleotidyltransferase; IPR012340: Nucleic acid-binding, OB-fold; IPR015847: Exoribonuclease, phosphorolytic domain 2; IPR015848: P…	EMQU_0187	188291	190402	+	41.2879	733.199	710.498	426.821	0.969039	0.582135
	hypothetical protein	InterPro: IPR007341: Transglycosylase-associated protein	EMQU_0188	190577	190834	+	39.1473	124.374	122.382	28.7649	0.983985	0.231277
	potassium uptake protein	KO: K03549; InterPro: IPR003855: K+ potassium transporter; IPR023051: Potassium uptake protein, low affinity, Kup	EMQU_0189	190935	192932	+	40.5405	253.072	208.809	183.491	0.825095	0.725052
	hemolysin	InterPro: IPR000644: Cystathionine beta-synthase, core; IPR002550: Domain of unknown function DUF21; IPR005170: Transporter-associated domain; IPR016169: CO dehydrogenase flavoprotein-like, FAD-binding, subdomain 2	EMQU_0190	193473	194771	+	40.5697	458.868	220.356	291.75	0.480216	0.635803
dinF	MATE family multi antimicrobial extrusion protein	InterPro: IPR002528: Multi antimicrobial extrusion protein; IPR015522: Na+ driven multidrug efflux pump	EMQU_0191	194818	196194	-	41.1765	109.102	46.236	94.1365	0.423788	0.862834
	hypothetical protein	InterPro: IPR009303: Protein of unknown function DUF960	EMQU_0192	196412	196735	-	37.3457	291.114	107.038	204.621	0.367685	0.70289
rplY	50S ribosomal protein L25	KO: K02897: large subunit ribosomal protein L25; InterPro: IPR001021: Ribosomal protein L25, long-form; IPR011035: Ribosomal protein L25/Gln-tRNA synthetase, anti-codon-binding domain; IPR020055: Ribosomal protein L25, short-form; IPR020056: Ribosomal protein L25/Gln-tRNA synthetase, beta-barrel domain; IPR020057: Ribosomal protein L25, beta domain	EMQU_0193	197065	197673	-	38.7521	789.561	1481.46	482.57	1.87631	0.611188
rsuA	pseudouridylate synthase	InterPro: IPR000748: Pseudouridine synthase, RsuA/RluB/E/F; IPR002942: RNA-binding S4; IPR006145: Pseudouridine synthase, RsuA and RluB/C/D/E/F; IPR020103: Pseudouridine synthase, catalytic domain	EMQU_0194	197995	198711	+	37.5174	147.146	19.4919	48.9926	0.132467	0.332953
	DNA-damage-inducible protein J	InterPro: IPR007337: RelB antitoxin	EMQU_0195	198796	199107	+	36.2179	310.102	89.5876	206.148	0.288897	0.664775
	mazF family toxin-antitoxin system	InterPro: IPR003477: PemK-like protein	EMQU_0196	199100	199417	+	35.2201	290.491	109.058	247.378	0.375425	0.851585
	putative hydrolase	KO: K07025; InterPro: IPR005834: Haloacid dehalogenase-like hydrolase; IPR006439: HAD-superfamily hydrolase, subfamily IA, variant 1; IPR011951: HAD-superfamily hydrolase, subfamily IA, YjjG/YfnB; IPR023214: HAD-like domain	EMQU_0197	199550	200245	+	39.6552	266.147	48.3407	150.701	0.181631	0.566233
udk	uridine kinase	KO: K00876: uridine kinase [EC:2.7.1.48]; InterPro: IPR000764: Uridine kinase; IPR006083: Phosphoribulokinase/uridine kinase	EMQU_0198	200329	200958	+	39.5238	342.649	101.88	177.484	0.297332	0.517976
	hypothetical protein	InterPro: IPR015414: SNARE associated Golgi protein	EMQU_0199	201291	201893	+	35.8209	86.2726	11.1592	35.2811	0.129349	0.408949
	acetyltransferase	InterPro: IPR000182: GCN5-related N-acetyltransferase (GNAT) domain; IPR016181: Acyl-CoA N-acyltransferase	EMQU_0200	201916	202407	+	39.4309	184.792	22.0934	88.4929	0.119558	0.478879
	hypothetical protein		EMQU_0201	202842	204215	+	38.3552	192.495	35.0352	39.6093	0.182006	0.205768
	hypothetical protein	KO: K09768; InterPro: IPR003791: Protein of unknown function DUF188	EMQU_0202	204196	204642	+	40.4922	164.239	15.0537	28.7777	0.0916577	0.175219
	hypothetical protein	InterPro: IPR019649: Protein of unknown function DUF2512	EMQU_0203	204818	205183	+	38.5246	406.487	280.023	179.788	0.688884	0.442298
ubiB	ubiquinone biosynthesis protein UbiB	KO: K03688: ubiquinone biosynthesis protein; InterPro: IPR004147: ABC-1; IPR011009: Protein kinase-like domain	EMQU_0204	205363	207108	-	38.7171	219.705	132.517	138.282	0.603161	0.629401
	D-alanine--D-alanine ligase	KO: K01921: D-alanine-D-alanine ligase [EC:6.3.2.4]; InterPro: IPR000291: D-alanine--D-alanine ligase/VANA/B/C, conserved site; IPR005905: D-alanine--D-alanine ligase; IPR011095: D-alanine--D-alanine ligase, C-terminal; IPR011127: D-alanine--D-alanine ligase, N-terminal; IPR011761: ATP-grasp fold; IPR013815: ATP-grasp fold, subdomain 1; IPR013816: ATP-grasp fold, subdomain 2; IPR013817: Pre-ATP-g…	EMQU_0205	207287	208354	+	41.4794	493.474	189.018	285.365	0.383034	0.578277
murF	UDP-N-acetylmuramoyl-tripeptide--D-alanyl-D- alanine ligase	KO: K01929: UDP-N-acetylmuramoyl-tripeptide--D-alanyl-D-alanine ligase [EC:6.3.2.10]; InterPro: IPR000713: Mur ligase, N-terminal; IPR004101: Mur ligase, C-terminal; IPR005863: UDP-MurNAc-pentapeptide synthetase; IPR013221: Mur ligase, central	EMQU_0206	208552	209904	+	41.9808	476.848	296.874	343.001	0.622577	0.71931
	DEAD/DEAH box helicase	KO: K05592: ATP-dependent RNA helicase DeaD [EC:3.6.4.13]; InterPro: IPR000629: RNA helicase, ATP-dependent, DEAD-box, conserved site; IPR001650: Helicase, C-terminal; IPR011545: DNA/RNA helicase, DEAD/DEAH box type, N-terminal; IPR014001: DEAD-like helicase; IPR014014: RNA helicase, DEAD-box type, Q motif	EMQU_0207	210221	211756	+	40.9505	564.69	445.164	326.938	0.788334	0.578969
	holo-(acyl-carrier-protein) synthase	KO: K00997: holo-[acyl-carrier protein] synthase [EC:2.7.8.7]; InterPro: IPR002582: Holo-[acyl carrier protein] synthase; IPR004568: Phosphopantethiene-protein transferase; IPR008278: 4'-phosphopantetheinyl transferase	EMQU_0208	212475	212825	+	39.0313	80.3392	8.84816	53.5633	0.110135	0.666715
alr	alanine racemase	KO: K01775: alanine racemase [EC:5.1.1.1]; InterPro: IPR000821: Alanine racemase; IPR001608: Alanine racemase, N-terminal; IPR009006: Alanine racemase/group IV decarboxylase, C-terminal; IPR011079: Alanine racemase, C-terminal; IPR020622: Alanine racemase, pyridoxal-phosphate attachment site	EMQU_0209	212841	213959	+	42.4486	178.139	111.017	63.2262	0.623203	0.354925
pemK	pemK family transcriptional regulator	KO: K07171; InterPro: IPR003477: PemK-like protein; IPR011067: Plasmid maintenance toxin/Cell growth inhibitor	EMQU_0210	213970	214332	+	39.6694	267.874	22.8151	58.6074	0.0851711	0.218788
	phage infection protein	KO: K01421; InterPro: IPR013525: ABC-2 type transporter; IPR017500: Phage infection protein, YhgE, N-terminal; IPR017501: Phage infection protein, YhgE, C-terminal	EMQU_0211	214982	217711	+	37.6557	274.796	240.228	196.09	0.874205	0.713585
	APC family amino acid-polyamine-organocation transporter	InterPro: IPR002293: Amino acid/polyamine transporter I	EMQU_0212	218012	219835	+	40.5702	143.938	70.3778	40.9584	0.488945	0.284556
	hypothetical protein		EMQU_0213	220000	220203	+	32.8431	33.366	0	12.1264	0	0.363435
chpA_1	chpA/MazF transcriptional modulator	InterPro: IPR003477: PemK-like protein; IPR011067: Plasmid maintenance toxin/Cell growth inhibitor	EMQU_0214	220220	220456	+	32.9114	45.1316	0	10.4379	0	0.231277
opuCD	glycine/betaine/carnitine/choline ABC superfamily ATP binding cassette transporter, membrane protein	KO: K05846: osmoprotectant transport system permease protein; InterPro: IPR000515: Binding-protein-dependent transport systems inner membrane component	EMQU_0215	220775	221440	-	44.7447	269.376	217.617	109.203	0.807856	0.405392
opuCC	glycine/betaine/carnitine/choline ABC superfamily ATP binding cassette transporter, binding protein	KO: K05845: osmoprotectant transport system substrate-binding protein; InterPro: IPR007210: ABC-type glycine betaine transport system, substrate-binding domain	EMQU_0216	221443	222360	-	40.6318	338.427	321.96	144.977	0.951344	0.428387
opuCB	glycine/betaine/carnitine/choline ABC superfamily ATP binding cassette transporter, membrane protein	KO: K05846: osmoprotectant transport system permease protein; InterPro: IPR000515: Binding-protein-dependent transport systems inner membrane component	EMQU_0217	222357	222998	-	42.9907	374.866	628.075	294.387	1.67546	0.785313
opuAA	glycine/betaine/carnitine/choline ABC superfamily ATP binding cassette transporter, ABC protein	KO: K05847: osmoprotectant transport system ATP-binding protein; InterPro: IPR000644: Cystathionine beta-synthase, core; IPR003439: ABC transporter-like; IPR003593: ATPase, AAA+ type, core; IPR005892: Glycine betaine/L-proline transport ATP-binding subunit; IPR017871: ABC transporter, conserved site	EMQU_0218	223002	224171	-	40.8547	467.906	197.756	285.436	0.422641	0.610028
queA	S-adenosylmethionine--tRNA ribosyltransferase-isomerase	KO: K07568; InterPro: IPR003699: Queuosine biosynthesis protein	EMQU_0219	224433	225464	+	42.345	303.398	127.398	163.48	0.419904	0.538832
	cation transporter E1-E2 family ATPase	InterPro: IPR000695: ATPase, P-type, H+ transporting proton pump; IPR001757: ATPase, P-type, K/Mg/Cd/Cu/Zn/Na/Ca/Na/H-transporter; IPR004014: ATPase, P-type cation-transporter, N-terminal; IPR005834: Haloacid dehalogenase-like hydrolase; IPR006068: ATPase, P-type cation-transporter, C-terminal; IPR008250: ATPase, P-type, ATPase-associated domain; IPR018303: ATPase, P-type phosphorylation site; IP…	EMQU_0220	226035	228695	+	41.6009	361.217	454.204	191.32	1.25743	0.529655
	integral membrane protein	InterPro: IPR010380: Protein of unknown function DUF975	EMQU_0221	228760	229452	-	38.8167	485.489	410.807	721.073	0.846173	1.48525
tgt	queuine tRNA-ribosyltransferase	KO: K00773; InterPro: IPR002616: Queuine/other tRNA-ribosyltransferase; IPR004803: Queuine tRNA-ribosyltransferase	EMQU_0222	229659	230804	+	39.9651	208.307	102.53	120.019	0.492206	0.576166
	preprotein translocase subunit YajC	KO: K03210: preprotein translocase subunit YajC; InterPro: IPR003849: Preprotein translocase YajC	EMQU_0223	230898	231275	+	41.5344	1230.91	477.906	925.377	0.388254	0.751782
	bifunctional acetaldehyde-CoA/alcohol dehydrogenase	KO: K04072: acetaldehyde dehydrogenase / alcohol dehydrogenase [EC:1.2.1.10 1.1.1.1]; InterPro: IPR001670: Alcohol dehydrogenase, iron-type; IPR012079: Bifunctional aldehyde/alcohol dehydrogenase; IPR015590: Aldehyde dehydrogenase domain; IPR016161: Aldehyde/histidinol dehydrogenase; IPR016162: Aldehyde dehydrogenase, N-terminal; IPR016163: Aldehyde dehydrogenase, C-terminal; IPR018211: Alcohol d…	EMQU_0224	231590	234187	+	40.9931	1089.53	8384.88	3772.75	7.69587	3.46273
	hypothetical protein		EMQU_0225	234465	234719	+	37.6471	142.997	2.02987	29.1033	0.0141952	0.203523
	glycosyl hydrolase	KO: K15532; InterPro: IPR008928: Six-hairpin glycosidase-like; IPR010905: Glycosyl hydrolase, family 88; IPR012341: Six-hairpin glycosidase	EMQU_0226	234919	235578	+	43.0303	169.43	13.3326	43.4785	0.0786907	0.256617
	glycosyl hydrolase	InterPro: IPR008928: Six-hairpin glycosidase-like; IPR010905: Glycosyl hydrolase, family 88; IPR012341: Six-hairpin glycosidase	EMQU_0227	235588	236025	+	42.2374	135.423	90.9967	141.197	0.671944	1.04264
	TRAP dicarboxylate transporter subunit DctP	InterPro: IPR004682: TRAP dicarboxylate transporter, DctP subunit; IPR018389: Extracellular solute-binding protein, family 7, bacteria	EMQU_0228	236042	237061	+	41.5686	114.398	53.7916	59.6617	0.470216	0.521529
	TRAP-T family tripartite ATP-independent periplasmic transporter, membrane protein	InterPro: IPR007387: Tripartite ATP-independent periplasmic transporter, DctQ component	EMQU_0229	237065	237544	+	41.25	113.444	11.8621	149.457	0.104563	1.31745
dctM	TRAP-T family tripartite ATP-independent periplasmic transporter, membrane protein	InterPro: IPR004681: TRAP dicarboxylate transporter, DctM subunit; IPR010656: TRAP C4-dicarboxylate transport system permease DctM subunit	EMQU_0230	237555	238850	+	41.358	174.443	37.1438	47.3377	0.212928	0.271365
	AP endonuclease	InterPro: IPR012307: Xylose isomerase, TIM barrel domain; IPR013022: Xylose isomerase-like, TIM barrel domain	EMQU_0231	238864	239703	+	42.0238	108.814	11.0918	36.5177	0.101934	0.335597
	araC family transcriptional regulator	InterPro: IPR003313: Transcription regulator HTH, AraC, arabinose-binding/dimerisation; IPR009057: Homeodomain-like; IPR012287: Homeodomain-related; IPR018060: Helix-turn-helix, AraC type, DNA binding	EMQU_0232	239761	240672	+	36.5132	46.9131	0	27.1248	0	0.578192
	iclR family transcriptional regulator	InterPro: IPR005471: Transcription regulator IclR, N-terminal; IPR011991: Winged helix-turn-helix transcription repressor DNA-binding; IPR014757: Transcription regulator IclR, C-terminal	EMQU_0233	240724	241485	+	35.0394	137.18	76.0802	16.8814	0.554603	0.123061
kdgA	2-dehydro-3-deoxyphosphogluconate aldolase	KO: K01625: 2-dehydro-3-deoxyphosphogluconate aldolase / 4-hydroxy-2-oxoglutarate aldolase [EC:4.1.2.14 4.1.3.16]; InterPro: IPR000887: KDPG/KHG aldolase; IPR013785: Aldolase-type TIM barrel	EMQU_0234	241588	242223	+	44.3396	261.442	22.7882	68.4568	0.0871634	0.261843
kdgK	2-dehydro-3-deoxygluconokinase	KO: K00874: 2-dehydro-3-deoxygluconokinase [EC:2.7.1.45]; InterPro: IPR011611: Carbohydrate/purine kinase	EMQU_0235	242230	243237	+	43.75	239.719	65.7292	122.707	0.274193	0.51188
kduI	4-deoxy-L-threo-5-hexosulose-uronate ketol-isomerase	KO: K01815: 4-deoxy-L-threo-5-hexosulose-uronate ketol-isomerase [EC:5.3.1.17]; InterPro: IPR007045: 5-keto 4-deoxyuronate isomerase; IPR011051: Cupin, RmlC-type; IPR021120: KduI/IolB isomerase	EMQU_0236	243254	244096	+	39.2645	158.026	74.2962	69.2541	0.470151	0.438244
idnO	gluconate 5-dehydrogenase	KO: K00046; InterPro: IPR002198: Short-chain dehydrogenase/reductase SDR; IPR002347: Glucose/ribitol dehydrogenase; IPR016040: NAD(P)-binding domain; IPR020904: Short-chain dehydrogenase/reductase, conserved site	EMQU_0237	244112	244915	+	42.2886	175.972	45.71	44.3065	0.259757	0.251782
fni	isopentenyl-diphosphate delta-isomerase	KO: K01823: isopentenyl-diphosphate delta-isomerase [EC:5.3.3.2]; InterPro: IPR000262: FMN-dependent dehydrogenase; IPR011179: Isopentenyl-diphosphate delta-isomerase, FMN-dependent; IPR013785: Aldolase-type TIM barrel	EMQU_0238	244957	246000	-	43.8697	379.545	184.934	260.173	0.487252	0.685487
	phosphomevalonate kinase	KO: K00938: phosphomevalonate kinase [EC:2.7.4.2]; InterPro: IPR005917: Phosphomevalonate kinase, Gram-positive; IPR006204: GHMP kinase; IPR006206: Mevalonate/galactokinase; IPR013750: GHMP kinase, C-terminal; IPR014721: Ribosomal protein S5 domain 2-type fold, subgroup; IPR020568: Ribosomal protein S5 domain 2-type fold	EMQU_0239	245997	247082	-	43.186	284.73	308.378	103.416	1.08305	0.363206
	mevalonate diphosphate decarboxylase	KO: K01597: diphosphomevalonate decarboxylase [EC:4.1.1.33]; InterPro: IPR005935: Diphosphomevalonate decarboxylase; IPR006204: GHMP kinase; IPR014721: Ribosomal protein S5 domain 2-type fold, subgroup; IPR020568: Ribosomal protein S5 domain 2-type fold	EMQU_0240	247095	248072	-	42.8425	209.788	165.659	136.589	0.789649	0.651082
	mevalonate kinase	KO: K00869: mevalonate kinase [EC:2.7.1.36]; InterPro: IPR006204: GHMP kinase; IPR006205: Mevalonate kinase; IPR006206: Mevalonate/galactokinase; IPR013750: GHMP kinase, C-terminal; IPR014721: Ribosomal protein S5 domain 2-type fold, subgroup; IPR020568: Ribosomal protein S5 domain 2-type fold	EMQU_0241	248065	249012	-	43.038	104.623	43.1348	109.598	0.412287	1.04755
	deoxynucleoside kinase	InterPro: IPR002624: Deoxynucleoside kinase	EMQU_0242	249309	249965	+	37.5951	161.323	159.934	35.3935	0.991384	0.219395
	chitin binding protein	InterPro: IPR003610: Carbohydrate-binding module family 5/12; IPR003961: Fibronectin, type III; IPR004302: Chitin-binding, domain 3; IPR013783: Immunoglobulin-like fold; IPR014756: Immunoglobulin E-set	EMQU_0243	250098	251495	-	41.774	160.672	34.0635	99.8005	0.212006	0.621143
	chitin binding protein	KO: K03933; InterPro: IPR003610: Carbohydrate-binding module family 5/12; IPR003961: Fibronectin, type III; IPR004302: Chitin-binding, domain 3; IPR013783: Immunoglobulin-like fold; IPR014756: Immunoglobulin E-set	EMQU_0244	252267	253637	-	42.5237	93.2663	37.7547	22.0132	0.404806	0.236025
infC	translation initiation factor IF3	KO: K02520; InterPro: IPR001288: Translation initiation factor 3; IPR019813: Translation initiation factor 3, conserved site; IPR019814: Translation initiation factor 3, N-terminal; IPR019815: Translation initiation factor 3, C-terminal	EMQU_0245	254309	254833	+	41.5238	1400.23	890.302	1096.94	0.635826	0.783404
rpmI	50S ribosomal protein L35	KO: K02916: large subunit ribosomal protein L35; InterPro: IPR001706: Ribosomal protein L35, non-mitochondrial; IPR018265: Ribosomal protein L35, conserved site; IPR021137: Ribosomal protein L35	EMQU_0246	254905	255105	+	42.2886	1659.34	898.749	1068.28	0.541631	0.643799
rplT1	50S ribosomal protein L20	KO: K02887: large subunit ribosomal protein L20; InterPro: IPR005813: Ribosomal protein L20	EMQU_0247	255159	255518	+	40.2778	1401.85	1181.89	738.011	0.843096	0.526455
	citMHS family citrate-magnesium (Mg2+):proton (H+) citrate-calcium (Ca2+): proton (H+) symporter		EMQU_0248	255874	257211	+	42.1525	246.002	20.8904	100.578	0.0849195	0.408851
hyuA	N-methylhydantoinase	InterPro: IPR002821: Hydantoinase/oxoprolinase; IPR008040: Hydantoinaseoxoprolinase, N-terminal	EMQU_0249	257247	259376	+	43.3333	223.465	14.3378	75.2586	0.0641611	0.33678
	hypothetical protein		EMQU_0250	259351	259995	+	39.845	38.443	4.81505	9.20476	0.125252	0.239439
	gntR family transcriptional regulator	InterPro: IPR011711: GntR, C-terminal	EMQU_0251	260066	260599	-	39.3258	130.197	0.969321	48.1785	0.00744503	0.370043
	hypothetical protein		EMQU_0252	260925	261092	-	41.0714	295.187	9.24317	88.3493	0.0313129	0.299299
	4-hydroxybenzoyl-CoA thioesterase	KO: K07107; InterPro: IPR006683: Thioesterase superfamily; IPR006684: 4-hydroxybenzoyl-CoA thioesterase	EMQU_0253	261174	261632	-	41.6122	139.819	46.236	45.2718	0.330683	0.323787
	carbohydrate kinase	InterPro: IPR000631: Uncharacterised domain, carbohydrate kinase-related; IPR017953: Carbohydrate kinase, predicted, conserved site	EMQU_0254	261647	262474	-	42.8744	204.928	53.7622	60.3507	0.262347	0.294497
	dipeptidase PepV	InterPro: IPR001261: ArgE/DapE/ACY1/CPG2/YscS, conserved site; IPR002933: Peptidase M20; IPR010964: Peptidase M20A, peptidase V-related; IPR011291: Peptidase M20A, peptidase V; IPR011650: Peptidase M20, dimerisation	EMQU_0255	262617	264035	+	42.7061	1216.33	901.362	1052.27	0.741049	0.865118
	regulatory protein, GntR family protein	KO: K03492; InterPro: IPR000524: Transcription regulator HTH, GntR; IPR011663: UbiC transcription regulator-associated; IPR011991: Winged helix-turn-helix transcription repressor DNA-binding	EMQU_0256	264347	265051	+	39.5745	275.163	95.4472	129.128	0.346875	0.469277
	oligo-beta-mannoside permease IIC component	KO: K02761: PTS system, cellobiose-specific IIC component; InterPro: IPR003352: Phosphotransferase system, EIIC; IPR004501: Phosphotransferase system, lactose/cellobiose IIC component	EMQU_0257	265222	266553	+	38.5886	74.8266	12.4353	60.173	0.166188	0.804166
celA_2	6-phospho-beta-glucosidase	KO: K01223: 6-phospho-beta-glucosidase [EC:3.2.1.86]; InterPro: IPR001360: Glycoside hydrolase, family 1; IPR013781: Glycoside hydrolase, subgroup, catalytic domain; IPR017853: Glycoside hydrolase, superfamily	EMQU_0258	266653	267966	+	37.5951	77.3317	104.39	67.7748	1.3499	0.876417
	hypothetical protein		EMQU_0259	268235	268414	+	33.3333	51.3201	11.5026	8.24593	0.224135	0.160676
	hypothetical protein		EMQU_0260	268550	268750	+	24.8756	72.5657	0	14.7688	0	0.203523
	hypothetical protein	InterPro: IPR012544: Protein of unknown function DUF1696; IPR023363: BPHL domain	EMQU_0261	268849	269229	-	37.5328	116.124	0	35.0614	0	0.30193
	succinate-semialdehyde dehydrogenase	KO: K00135: succinate-semialdehyde dehydrogenase (NADP+) [EC:1.2.1.16]; InterPro: IPR015590: Aldehyde dehydrogenase domain; IPR016161: Aldehyde/histidinol dehydrogenase; IPR016162: Aldehyde dehydrogenase, N-terminal; IPR016163: Aldehyde dehydrogenase, C-terminal	EMQU_0262	269444	270901	+	40.4664	375.814	421.762	97.3902	1.12226	0.259145
	predicted protein		EMQU_0263	271090	272301	-	32.1782	91.8627	16.2289	55.5172	0.176665	0.604349
	predicted protein		EMQU_0264	272311	274074	-	33.7302	50.9894	60.1539	57.2167	1.17974	1.12213
	family 2 glycosyltransferase	InterPro: IPR001173: Glycosyl transferase, family 2	EMQU_0265	274086	275042	-	35.5277	122.437	56.7919	90.9896	0.463847	0.743156
	hypothetical protein	InterPro: IPR005075: Peptidase M4, propeptide, PepSY	EMQU_0266	275180	275530	-	39.886	254.869	272.818	94.4406	1.07043	0.370545
pepA	M42 family glutamyl aminopeptidase	KO: K01261; InterPro: IPR008007: Peptidase M42; IPR017538: Peptidase M42, glutamyl aminopeptidase; IPR023367: Peptidase M42, domain 2	EMQU_0267	275732	276811	+	41.4815	346.636	165.829	376.106	0.478396	1.08502
	thioredoxin family protein	InterPro: IPR005746: Thioredoxin; IPR012336: Thioredoxin-like fold; IPR013766: Thioredoxin domain	EMQU_0268	276935	277255	+	37.6947	748.218	640.169	1006.47	0.85559	1.34515
	universal stress protein	InterPro: IPR006015: Universal stress protein A; IPR006016: UspA; IPR014729: Rossmann-like alpha/beta/alpha sandwich fold	EMQU_0269	277277	277732	+	39.693	1004.37	803.669	1073.06	0.800175	1.06839
	tRNA-binding domain-containing protein	KO: K06878; InterPro: IPR002547: tRNA-binding domain; IPR012340: Nucleic acid-binding, OB-fold; IPR016027: Nucleic acid-binding, OB-fold-like	EMQU_0270	278002	278607	+	42.4092	277.594	53.8117	126.546	0.19385	0.455869
	serine protease do-like htrA	KO: K01362; InterPro: IPR001254: Peptidase S1/S6, chymotrypsin/Hap; IPR001478: PDZ/DHR/GLGF; IPR001940: Peptidase S1C, HrtA/DegP2/Q/S; IPR009003: Peptidase cysteine/serine, trypsin-like	EMQU_0271	278657	279961	-	40.1533	288.361	90.4343	231.265	0.313615	0.801998
rlmH	ribosomal RNA large subunit methyltransferase H	KO: K00783; InterPro: IPR003742: SPOUT methyltransferase, predicted; IPR016051: Ribosomal RNA large subunit methyltransferase H	EMQU_0272	280390	280869	+	41.6667	110.406	77.6426	89.6745	0.703248	0.812227
	hypothetical protein		EMQU_0273	281225	281620	+	34.596	40.5159	7.84269	71.2149	0.193571	1.7577
	hypothetical protein	InterPro: IPR006829: Transposase, Gram-positive bacteria	EMQU_0274	281667	282857	+	36.7758	64.4988	10.8652	95.9602	0.168456	1.48778
	hypothetical protein		EMQU_0275	282854	283447	+	29.4613	64.6617	12.1997	28.3194	0.18867	0.437962
	hypothetical protein HMPREF9394_1107		EMQU_0276	283473	283775	+	33.6634	126.763	3.41662	57.15	0.0269529	0.450843
	hypothetical protein		EMQU_0277	283976	284569	+	28.6195	15.5515	0	7.4963	0	0.482029
ygjU	DAACS family dicarboxylate/amino acid:sodium (Na+) symporter	KO: K07862; InterPro: IPR001991: Sodium: dicarboxylate symporter; IPR023025: Serine/threonine transporter SstT	EMQU_0278	285062	286297	+	39.1586	188.812	41.8784	66.4478	0.2218	0.351926
	PRD domain/PTS system IIA domain transcriptional antiterminator, BglG protein	InterPro: IPR002178: Phosphotransferase system, phosphoenolpyruvate-dependent sugar EIIA 2; IPR003501: Phosphotransferase system, EIIB component, type 2/3; IPR007737: M trans-acting positive regulator; IPR011608: PRD; IPR013011: Phosphotransferase system, EIIB component, type 2; IPR016152: Phosphotransferase/anion transporter	EMQU_0279	286527	288167	+	34.9177	72.2916	10.7246	44.6215	0.148351	0.617243
	bglG family transcriptional antiterminator	InterPro: IPR002178: Phosphotransferase system, phosphoenolpyruvate-dependent sugar EIIA 2; IPR016152: Phosphotransferase/anion transporter	EMQU_0280	288164	288595	+	35.6481	31.5123	38.342	16.0338	1.21673	0.508809
	PTS family transporter, IIB component	KO: K02822: PTS system, ascorbate-specific IIB component [EC:2.7.1.69]; InterPro: IPR003501: Phosphotransferase system, EIIB component, type 2/3; IPR013011: Phosphotransferase system, EIIB component, type 2	EMQU_0281	288608	288889	+	34.3972	41.3779	45.8881	12.2812	1.109	0.296805
ulaA_1	PTS system ascorbate-specific transporter subunit IIC	InterPro: IPR004703: Phosphotransferase system, sugar-specific permease component	EMQU_0282	288894	290144	+	41.5667	164.395	32.2735	56.5548	0.196316	0.344017
	hypothetical protein	InterPro: IPR001347: Sugar isomerase (SIS)	EMQU_0283	290145	290885	+	38.4615	116.135	39.1182	188.288	0.336835	1.62129
	hypothetical protein		EMQU_0284	291077	291721	+	37.3643	92.7154	0.802508	32.2167	0.0086556	0.347479
	PTS family porter component IIA	KO: K03483; InterPro: IPR002178: Phosphotransferase system, phosphoenolpyruvate-dependent sugar EIIA 2; IPR007737: M trans-acting positive regulator; IPR011608: PRD; IPR011991: Winged helix-turn-helix transcription repressor DNA-binding; IPR013011: Phosphotransferase system, EIIB component, type 2; IPR013196: Helix-turn-helix, type 11; IPR016152: Phosphotransferase/anion transporter	EMQU_0285	291998	294079	+	39.6734	87.1033	76.0763	102.896	0.873404	1.18131
	PTS family porter component IIB	KO: K02822: PTS system, ascorbate-specific IIB component [EC:2.7.1.69]; InterPro: IPR003501: Phosphotransferase system, EIIB component, type 2/3; IPR013011: Phosphotransferase system, EIIB component, type 2	EMQU_0286	294098	294400	+	38.2838	88.2524	117.873	182.88	1.33564	2.07224
	PTS system ascorbate-specific transporter subunit IIC	KO: K03475: PTS system, ascorbate-specific IIC component; InterPro: IPR004703: Phosphotransferase system, sugar-specific permease component	EMQU_0287	294426	295715	+	42.1705	224.628	40.5266	77.8569	0.180417	0.346605
	hypothetical protein	InterPro: IPR011990: Tetratricopeptide-like helical; IPR013026: Tetratricopeptide repeat-containing; IPR019734: Tetratricopeptide repeat	EMQU_0288	295735	296127	+	38.4224	94.0216	32.9273	21.4017	0.35021	0.227625
fba_1	fructose-bisphosphate aldolase	KO: K01624: fructose-bisphosphate aldolase, class II [EC:4.1.2.13]; InterPro: IPR000771: Ketose-bisphosphate aldolase, class-II; IPR013785: Aldolase-type TIM barrel	EMQU_0289	296151	297020	+	42.6437	131.886	102.334	40.9453	0.775923	0.31046
	hypothetical protein	InterPro: IPR010488: Zeta toxin domain	EMQU_0290	297004	297642	+	38.3412	62.3906	3.24017	22.4537	0.0519336	0.359889
	hypothetical protein	InterPro: IPR013094: Alpha/beta hydrolase fold-3	EMQU_0291	297763	298587	-	39.7576	114.328	32.6256	29.9852	0.285367	0.262272
	hypothetical protein	InterPro: IPR012914: Purine catabolism PurC-like	EMQU_0292	298559	300154	-	35.4637	104.793	44.7564	132.369	0.427094	1.26315
	hypothetical protein	InterPro: IPR003781: CoA-binding; IPR005811: ATP-citrate lyase/succinyl-CoA ligase; IPR009499: Protein of unknown function DUF1116; IPR016102: Succinyl-CoA synthetase-like; IPR024033: Uncharacterised domain, YlbE	EMQU_0293	300276	303287	+	43.4595	133.654	27.84	56.506	0.208299	0.422778
	hypothetical protein	InterPro: IPR021530: Protein of unknown function DUF2877	EMQU_0294	303280	304155	+	40.8676	99.9022	25.4082	73.4227	0.25433	0.734946
	major facilitator family transporter	InterPro: IPR005829: Sugar transporter, conserved site; IPR011701: Major facilitator superfamily; IPR016196: Major facilitator superfamily domain, general substrate transporter; IPR020846: Major facilitator superfamily domain	EMQU_0295	304125	305369	+	40.9639	175.732	17.046	45.3029	0.0970004	0.257796
arcC-2	carbamate kinase	KO: K00926: carbamate kinase [EC:2.7.2.2]; InterPro: IPR001048: Aspartate/glutamate/uridylate kinase; IPR003964: Bacterial carbamate kinase	EMQU_0296	305392	306330	+	43.131	82.3262	42.997	33.7214	0.522276	0.409607
	sodium/dicarboxylate symporter family protein	InterPro: IPR001991: Sodium: dicarboxylate symporter	EMQU_0297	306334	307551	+	40.9688	75.4434	29.3232	55.6499	0.388678	0.737638
bglF	PTS family beta-glucoside porter component IIABC	KO: K02755: PTS system, beta-glucosides-specific IIA component [EC:2.7.1.69]; InterPro: IPR001127: Phosphotransferase system, sugar-specific permease EIIA 1 domain; IPR001996: Phosphotransferase system, EIIB component, type 1; IPR003352: Phosphotransferase system, EIIC; IPR011055: Duplicated hybrid motif; IPR011297: Phosphotransferase system, beta-glucoside-specific IIABC component; IPR013013: Ph…	EMQU_0298	307755	309596	+	41.6395	129.334	72.2191	67.4179	0.558392	0.521269
bglH3	beta-glucosidase	KO: K01223: 6-phospho-beta-glucosidase [EC:3.2.1.86]; InterPro: IPR001360: Glycoside hydrolase, family 1; IPR013781: Glycoside hydrolase, subgroup, catalytic domain; IPR017853: Glycoside hydrolase, superfamily; IPR018120: Glycoside hydrolase, family 1, active site	EMQU_0299	309622	311088	+	41.0361	182.28	61.0414	184.48	0.334877	1.01207
bglG2	transcriptional antiterminator BglG	KO: K03488; InterPro: IPR004341: CAT RNA-binding domain; IPR011608: PRD	EMQU_0300	311139	311978	+	39.4048	126.178	62.8535	159.618	0.498134	1.26502
	2-dehydropantoate 2-reductase	KO: K00077: 2-dehydropantoate 2-reductase [EC:1.1.1.169]; InterPro: IPR003710: Ketopantoate reductase ApbA/PanE; IPR008927: 6-phosphogluconate dehydrogenase, C-terminal-like; IPR013328: Dehydrogenase, multihelical; IPR013332: Ketopantoate reductase ApbA/PanE, N-terminal; IPR013752: Ketopantoate reductase ApbA/PanE, C-terminal; IPR016040: NAD(P)-binding domain	EMQU_0301	312484	313422	+	39.8296	453.571	922.781	481.057	2.03448	1.0606
	regulatory protein	KO: K07035	EMQU_0302	313436	314488	+	43.3998	417.856	911.852	501.804	2.18222	1.2009
	tRNA pseudouridine synthase A	InterPro: IPR001406: Pseudouridine synthase I, TruA; IPR020094: Pseudouridine synthase I, TruA, N-terminal; IPR020095: Pseudouridine synthase I, TruA, C-terminal; IPR020097: Pseudouridine synthase I, TruA, alpha/beta domain; IPR020103: Pseudouridine synthase, catalytic domain	EMQU_0303	314627	315364	+	36.1789	206.862	134.665	138.103	0.650989	0.667609
msrA2	peptide-methionine-(S)-S-oxide reductase MsrA	KO: K07304; InterPro: IPR002569: Peptide methionine sulphoxide reductase MsrA; IPR015046: Enterocin A Immunity	EMQU_0304	315463	316281	+	41.514	274.261	216.78	301.445	0.790414	1.09911
	putative aldo/keto reductase	InterPro: IPR001395: Aldo/keto reductase; IPR005399: Potassium channel, voltage-dependent, beta subunit, KCNAB-related; IPR023210: NADP-dependent oxidoreductase domain	EMQU_0305	316491	317486	+	42.6707	220.641	155.909	189.259	0.706619	0.85777
	hypothetical protein	InterPro: IPR019757: Peptidase S26A, signal peptidase I, lysine active site; IPR019759: Peptidase S24/S26A/S26B	EMQU_0306	317996	318223	-	39.0351	68.2373	4.5405	97.6492	0.0665399	1.43102
	PTS system transporter subunit IIB	KO: K02760: PTS system, cellobiose-specific IIB component [EC:2.7.1.69]; InterPro: IPR003501: Phosphotransferase system, EIIB component, type 2/3; IPR013012: Phosphotransferase system, EIIB component, type 3	EMQU_0307	319006	319326	+	37.3832	663.4	80.6258	144.882	0.121534	0.218393
	PTS system transporter subunit IIA	KO: K02759: PTS system, cellobiose-specific IIA component [EC:2.7.1.69]; InterPro: IPR003188: Phosphotransferase system, lactose/cellobiose-specific IIA subunit	EMQU_0308	319350	319667	+	38.6792	562.636	30.9268	211.594	0.0549678	0.376076
	PTS family lactose/cellobiose (lac) porter component IIC	KO: K02761: PTS system, cellobiose-specific IIC component; InterPro: IPR003352: Phosphotransferase system, EIIC; IPR004501: Phosphotransferase system, lactose/cellobiose IIC component	EMQU_0309	319703	320953	+	40.7674	553.814	35.5836	305.317	0.0642519	0.551299
	conserved hypothetical protein	InterPro: IPR007351: Protein of unknown function DUF419	EMQU_0310	321077	321478	+	35.0746	95.5449	0	78.7671	0	0.824399
	SAM-dependent methyltransferase	InterPro: IPR013216: Methyltransferase type 11	EMQU_0311	321605	322108	-	37.6984	254.671	53.405	168.845	0.209702	0.662993
	SAM-dependent methyltransferase		EMQU_0312	322102	322332	-	44.5887	229.415	11.2038	107.09	0.0488367	0.466797
	acetyltransferase	InterPro: IPR000182: GCN5-related N-acetyltransferase (GNAT) domain; IPR016181: Acyl-CoA N-acyltransferase	EMQU_0313	322529	322993	+	39.1398	37.6406	3.33947	29.7917	0.0887199	0.79148
	hypothetical protein		EMQU_0314	323015	323341	-	38.8379	408.876	479.627	71.1117	1.17304	0.17392
fdh_1	S-(hydroxymethyl)glutathione dehydrogenase	KO: K00121: S-(hydroxymethyl)glutathione dehydrogenase / alcohol dehydrogenase [EC:1.1.1.284 1.1.1.1]; InterPro: IPR002085: Alcohol dehydrogenase superfamily, zinc-type; IPR002328: Alcohol dehydrogenase, zinc-type, conserved site; IPR011032: GroES-like; IPR013149: Alcohol dehydrogenase, C-terminal; IPR013154: Alcohol dehydrogenase GroES-like; IPR016040: NAD(P)-binding domain	EMQU_0315	323369	324502	-	39.2416	380.721	659.118	177.571	1.73124	0.466408
	hypothetical protein		EMQU_0316	324751	325593	+	40.0949	85.3573	33.771	116.206	0.395643	1.36141
	hypothetical protein	KO: K10254; InterPro: IPR010354: Streptococcal 67kDa myosin-cross-reactive antigen-like	EMQU_0317	325688	327382	-	39.528	185.584	305.074	133.978	1.64386	0.721926
	hypothetical protein		EMQU_0318	327429	327557	-	38.7597	45.227	24.0752	3.83532	0.53232	0.0848014
	hypothetical protein	KO: K09952; InterPro: IPR010145: CRISPR-associated protein, SAG0894	EMQU_0319	328238	332230	+	35.6374	179.354	157.632	347.804	0.878887	1.93921
	putative cytoplasmic protein	InterPro: IPR002729: CRISPR-associated protein Cas1; IPR019855: CRISPR-associated protein Cas1, NMENI subtype	EMQU_0320	332209	333075	+	35.8708	279.265	331.347	376.06	1.1865	1.34661
	putative cytoplasmic protein	KO: K09951; InterPro: IPR019199: Virulence-associated protein D / CRISPR associated protein Cas2; IPR021127: CRISPR associated protein Cas2	EMQU_0321	333072	333416	+	37.3913	159.245	342.078	724.208	2.14812	4.54776
csn2	csn2 family CRISPR-associated protein	InterPro: IPR010146: CRISPR-associated protein, Csn2-type	EMQU_0322	333403	334071	+	31.0912	108.285	149.328	286.944	1.37903	2.6499
	hypothetical protein	InterPro: IPR012427: Protein of unknown function DUF1622	EMQU_0323	334420	334782	+	34.4353	77.6833	38.5005	16.3556	0.495608	0.210542
	membrane protein	InterPro: IPR012427: Protein of unknown function DUF1622	EMQU_0324	334782	335138	+	36.4146	181.13	155.14	24.9457	0.856514	0.137723
	M protein trans-acting positive regulator		EMQU_0325	335366	336796	-	37.4563	92.7533	26.0436	15.5584	0.280784	0.167739
	pyridoxal-dependent decarboxylase	InterPro: IPR002129: Pyridoxal phosphate-dependent decarboxylase; IPR015421: Pyridoxal phosphate-dependent transferase, major region, subdomain 1; IPR015424: Pyridoxal phosphate-dependent transferase, major domain; IPR021115: Pyridoxal-phosphate binding site; IPR022397: Tyrosine decarboxylase, bacteria	EMQU_0326	337295	339130	+	41.3399	83.1502	40.3155	74.6445	0.484852	0.897707
	APC family amino acid transporter	InterPro: IPR002293: Amino acid/polyamine transporter I; IPR004841: Amino acid permease domain	EMQU_0327	339158	340612	+	40.4811	155.715	39.8441	49.6456	0.255879	0.318824
	cation transporter E1-E2 family ATPase	KO: K01529; InterPro: IPR000695: ATPase, P-type, H+ transporting proton pump; IPR001757: ATPase, P-type, K/Mg/Cd/Cu/Zn/Na/Ca/Na/H-transporter; IPR004014: ATPase, P-type cation-transporter, N-terminal; IPR005834: Haloacid dehalogenase-like hydrolase; IPR006068: ATPase, P-type cation-transporter, C-terminal; IPR008250: ATPase, P-type, ATPase-associated domain; IPR018303: ATPase, P-type phosphorylat…	EMQU_0328	340766	343315	+	40.4706	103.53	52.3707	37.2522	0.505851	0.35982
	ISL3 family transposase	InterPro: IPR002560: Transposase, IS204/IS1001/IS1096/IS1165	EMQU_0329	343456	344751	-	37.4228	0	0	0	#DIV/0!	#DIV/0!
	hypothetical protein	InterPro: IPR007737: M trans-acting positive regulator; IPR011991: Winged helix-turn-helix transcription repressor DNA-binding; IPR013199: Helix-turn-helix Mga, DNA-binding trans-acting positive regulator	EMQU_0330	345075	346517	-	36.729	126.012	86.0902	112.117	0.683191	0.889735
	putative ADP-ribose pyrophosphatase	InterPro: IPR000086: NUDIX hydrolase domain; IPR015797: NUDIX hydrolase domain-like	EMQU_0331	346634	347233	+	38.6667	269.836	174.265	264.694	0.645817	0.980946
	marR family transcriptional regulator	InterPro: IPR000835: Transcription regulator HTH, MarR-type; IPR011991: Winged helix-turn-helix transcription repressor DNA-binding; IPR023187: Transcriptional regulator MarR-type, conserved site	EMQU_0332	347302	347754	+	42.1634	291.929	354.219	234.818	1.21338	0.804367
	protease synthase and sporulation negative regulatory protein pai 1	InterPro: IPR000182: GCN5-related N-acetyltransferase (GNAT) domain; IPR016181: Acyl-CoA N-acyltransferase	EMQU_0333	347768	348295	+	43.5606	257.828	320.57	334.522	1.24335	1.29746
	B3/4 tRNA-binding domain protein	InterPro: IPR005146: B3/B4 tRNA-binding domain; IPR020825: Phenylalanyl-tRNA synthetase, B3/B4	EMQU_0334	348299	349009	+	42.0534	322.759	440.448	162.135	1.36463	0.502341
	glyoxalase/bleomycin resistance protein/dioxygenase superfamily protein		EMQU_0335	349229	349639	+	37.9562	410.482	93.1963	148.066	0.227041	0.360712
	hypothetical protein		EMQU_0336	349620	349880	+	36.7816	255.203	55.5298	119.424	0.21759	0.467955
	xanthine/uracil permeases family protein	KO: K06901; InterPro: IPR006043: Xanthine/uracil/vitamin C permease	EMQU_0337	350107	351417	+	43.7834	252.181	94.3635	49.0605	0.374189	0.194544
	hypothetical protein		EMQU_0338	351942	352118	+	33.8983	57.6836	11.6976	2.79523	0.202788	0.048458
	conserved hypothetical protein		EMQU_0339	352391	352906	+	39.9225	90.454	8.02508	69.0357	0.0887199	0.763213
	hypothetical protein		EMQU_0340	352909	353100	+	28.125	50.6448	0	10.3074	0	0.203523
	resolvase family site-specific recombinase	InterPro: IPR006118: Recombinase, conserved site; IPR006119: Resolvase, N-terminal	EMQU_0341	353267	353875	+	33.3333	144.5	46.7471	158.419	0.323509	1.09633
	putative ATP-dependent endonuclease of the OLD family protein	KO: K07459	EMQU_0342	353981	355738	+	28.7258	63.0554	23.2604	83.585	0.368888	1.32558
	ATP-dependent DNA helicase	InterPro: IPR000212: DNA helicase, UvrD/REP type; IPR014016: Helicase, superfamily 1, UvrD-related	EMQU_0343	355735	357300	+	26.6284	40.6711	14.5435	64.451	0.357589	1.58469
	glucan 1,6-alpha-glucosidase	KO: K01215; InterPro: IPR006047: Glycosyl hydrolase, family 13, catalytic domain; IPR006589: Glycosyl hydrolase, family 13, subfamily, catalytic domain; IPR013780: Glycosyl hydrolase, family 13, all-beta; IPR013781: Glycoside hydrolase, subgroup, catalytic domain; IPR015902: Alpha amylase; IPR017853: Glycoside hydrolase, superfamily	EMQU_0344	358148	359767	+	40.0617	175.869	123.973	108.724	0.704915	0.618211
	marR family transcriptional regulator	InterPro: IPR000835: Transcription regulator HTH, MarR-type; IPR011991: Winged helix-turn-helix transcription repressor DNA-binding	EMQU_0345	360817	361251	+	37.2414	71.5315	227.276	0	3.17728	0
	oxidoreductase	InterPro: IPR001155: NADH: flavin oxidoreductase/NADH oxidase, N-terminal; IPR013785: Aldolase-type TIM barrel	EMQU_0346	361348	362454	+	42.0054	191.49	308.607	174.751	1.61161	0.912588
	C56 family peptidase	InterPro: IPR002818: ThiJ/PfpI	EMQU_0347	362471	363148	+	40.2655	476.868	577.166	637.053	1.21033	1.33591
dkgB	2,5-diketo-D-gluconate reductase	InterPro: IPR001395: Aldo/keto reductase; IPR018170: Aldo/keto reductase, conserved site; IPR020471: Aldo/keto reductase subgroup; IPR023210: NADP-dependent oxidoreductase domain	EMQU_0348	363172	364035	+	40.625	301.618	644.625	251.386	2.13722	0.833459
	predicted protein		EMQU_0349	364303	364827	-	39.2381	100.942	31.55	12.2511	0.312555	0.121367
	ABC transporter ATP-binding/permease	InterPro: IPR003838: Permease FtsX-like	EMQU_0350	364844	366049	-	39.3035	72.5657	15.4513	36.5118	0.212928	0.503155
	ABC transporter ATP-binding protein	KO: K02003; InterPro: IPR003439: ABC transporter-like; IPR003593: ATPase, AAA+ type, core; IPR017871: ABC transporter, conserved site	EMQU_0351	366046	366720	-	39.7037	95.0773	0.766841	94.5533	0.00806545	0.99449
	integrating conjugative element protein	KO: K02005	EMQU_0352	366704	367945	-	42.1095	100.996	32.9241	22.3078	0.325994	0.220878
	sensor histidine kinase VanS	KO: K07644: two-component system, OmpR family, heavy metal sensor histidine kinase CusS [EC:2.7.13.3]; InterPro: IPR003594: ATPase-like, ATP-binding domain; IPR003661: Signal transduction histidine kinase, subgroup 1, dimerisation/phosphoacceptor domain; IPR004358: Signal transduction histidine kinase-related protein, C-terminal; IPR005467: Signal transduction histidine kinase, core; IPR009082: S…	EMQU_0353	368131	369270	+	37.807	119.415	12.2594	63.3635	0.102662	0.530615
	response regulator	KO: K02483; InterPro: IPR001789: Signal transduction response regulator, receiver domain; IPR001867: Signal transduction response regulator, C-terminal; IPR011006: CheY-like superfamily; IPR011991: Winged helix-turn-helix transcription repressor DNA-binding	EMQU_0354	369294	369971	+	36.4307	156.327	67.1834	35.027	0.429763	0.224063
	NADH oxidase	InterPro: IPR000103: Pyridine nucleotide-disulphide oxidoreductase, class-II; IPR004099: Pyridine nucleotide-disulphide oxidoreductase, dimerisation; IPR013027: FAD-dependent pyridine nucleotide-disulphide oxidoreductase; IPR016156: FAD/NAD-linked reductase, dimerisation; IPR023753: Pyridine nucleotide-disulphide oxidoreductase, FAD/NAD(P)-binding domain	EMQU_0355	370247	371545	+	41.0316	291.19	359.025	408.678	1.23296	1.40347
	transcriptional regulator	InterPro: IPR007737: M trans-acting positive regulator	EMQU_0356	371535	373016	+	36.3698	338.234	476.753	616.942	1.40954	1.82401
glpK	glycerol kinase	KO: K00864: glycerol kinase [EC:2.7.1.30]; InterPro: IPR000577: Carbohydrate kinase, FGGY; IPR005999: Glycerol kinase; IPR018483: Carbohydrate kinase, FGGY, conserved site; IPR018484: Carbohydrate kinase, FGGY, N-terminal; IPR018485: Carbohydrate kinase, FGGY, C-terminal	EMQU_0357	373107	374603	+	42.3514	2841.47	8706.48	3473.54	3.06408	1.22244
glpO	alpha-glycerophosphate oxidase	KO: K00111: glycerol-3-phosphate dehydrogenase [EC:1.1.5.3]; InterPro: IPR000447: FAD-dependent glycerol-3-phosphate dehydrogenase; IPR006076: FAD dependent oxidoreductase	EMQU_0358	374620	376443	+	41.4474	2453.88	10492.8	4213.02	4.27602	1.71688
	glycerol facilitator protein	KO: K02440; InterPro: IPR000425: Major intrinsic protein; IPR022357: Major intrinsic protein, conserved site; IPR023271: Aquaporin-like	EMQU_0359	376445	377161	+	45.1883	1695.9	9937.96	3766.91	5.85998	2.22118
fucO	lactaldehyde reductase	KO: K00048: lactaldehyde reductase [EC:1.1.1.77]; InterPro: IPR001670: Alcohol dehydrogenase, iron-type; IPR013460: Lactaldehyde reductase; IPR018211: Alcohol dehydrogenase, iron-type, conserved site	EMQU_0360	377274	378425	-	44.0972	121.126	6.73981	42.5181	0.0556432	0.351025
	hexapeptide repeat-containing acetyltransferase	KO: K00661; InterPro: IPR001451: Bacterial transferase hexapeptide repeat; IPR011004: Trimeric LpxA-like; IPR024688: Maltose/galactoside acetyltransferase	EMQU_0361	378431	379072	-	41.7445	189.327	99.9759	135.634	0.528061	0.716403
rhaD	rhamnulose-1-phosphate aldolase	KO: K01629: rhamnulose-1-phosphate aldolase [EC:4.1.2.19]; InterPro: IPR001303: Class II aldolase/adducin N-terminal; IPR013447: Rhamnulose-1-phosphate aldolase	EMQU_0362	379090	379914	-	43.0303	153.224	8.78381	14.9926	0.0573267	0.0978478
rhaA	L-rhamnose isomerase	KO: K01813: L-rhamnose isomerase [EC:5.3.1.14]; InterPro: IPR009308: Rhamnose isomerase; IPR013022: Xylose isomerase-like, TIM barrel domain	EMQU_0363	380288	381544	-	42.7208	99.4041	5.76503	71.2417	0.0579959	0.716688
rhaB	rhamnulokinase	KO: K00848: rhamnulokinase [EC:2.7.1.5]; InterPro: IPR000577: Carbohydrate kinase, FGGY; IPR013449: Rhamnulokinase; IPR018484: Carbohydrate kinase, FGGY, N-terminal; IPR018485: Carbohydrate kinase, FGGY, C-terminal	EMQU_0364	381560	383008	-	42.8571	110.391	19.6473	37.2177	0.177979	0.337144
	major facilitator superfamily transporter	InterPro: IPR011701: Major facilitator superfamily; IPR016196: Major facilitator superfamily domain, general substrate transporter; IPR020846: Major facilitator superfamily domain	EMQU_0365	383049	384227	-	41.5606	68.0419	34.2444	36.5087	0.503284	0.536562
	transcriptional regulator	InterPro: IPR003313: Transcription regulator HTH, AraC, arabinose-binding/dimerisation; IPR009057: Homeodomain-like; IPR012287: Homeodomain-related; IPR014710: RmlC-like jelly roll fold; IPR018060: Helix-turn-helix, AraC type, DNA binding; IPR018062: Helix-turn-helix, AraC type, subdomain 2; IPR020449: Transcription regulator HTH, AraC- type	EMQU_0366	384350	385330	+	35.7798	146.7	3.16586	95.3199	0.0215805	0.649762
	hypothetical protein	InterPro: IPR006542: Conserved hypothetical protein CHP01655	EMQU_0367	385544	385921	-	36.7725	182.643	335.493	89.0037	1.83688	0.48731
	mutS2 family protein	InterPro: IPR000432: DNA mismatch repair protein MutS, C-terminal; IPR005747: DNA mismatch repair protein MutS, type 2; IPR007696: DNA mismatch repair protein MutS, core	EMQU_0368	386336	388252	+	40.6364	141.013	121.776	83.1045	0.863583	0.589339
	hypothetical protein	InterPro: IPR000462: CDP-alcohol phosphatidyltransferase; IPR004570: CDP-diacylglycerol--glycerol-3-phosphate 3-phosphatidyltransferase	EMQU_0369	388376	388927	+	39.3116	245.738	0	73.4963	0	0.299085
	predicted protein		EMQU_0370	389301	389672	+	34.4086	53.5855	48.7006	7.97993	0.908838	0.14892
	lacI family transcriptional regulator	InterPro: IPR000843: Transcription regulator HTH, LacI; IPR001761: Periplasmic binding protein/LacI transcriptional regulator; IPR010982: Lambda repressor-like, DNA-binding	EMQU_0371	389939	390859	-	38.5451	78.6562	24.7287	171.902	0.31439	2.18549
	haloacid dehalogenase (HAD) superfamily hydrolase	KO: K07024; InterPro: IPR000150: Cof protein; IPR006379: HAD-superfamily hydrolase, subfamily IIB; IPR013200: HAD superfamily hydrolase-like, type 3; IPR023214: HAD-like domain	EMQU_0372	390960	391775	+	38.1127	132.272	50.7468	16.9769	0.383654	0.128348
	hypothetical protein	InterPro: IPR003735: Protein of unknown function DUF156	EMQU_0373	391942	392202	-	36.7816	217.947	73.3787	85.3027	0.336681	0.391391
	rhodanese family protein	InterPro: IPR001763: Rhodanese-like	EMQU_0374	392374	392685	+	36.5385	126.223	180.834	112.589	1.43266	0.891986
	coenzyme A disulfide reductase	KO: K00359; InterPro: IPR001763: Rhodanese-like; IPR004099: Pyridine nucleotide-disulphide oxidoreductase, dimerisation; IPR013027: FAD-dependent pyridine nucleotide-disulphide oxidoreductase; IPR016156: FAD/NAD-linked reductase, dimerisation; IPR023753: Pyridine nucleotide-disulphide oxidoreductase, FAD/NAD(P)-binding domain	EMQU_0375	392689	394344	+	42.6932	191.129	132.217	90.2272	0.69177	0.472074
fms3	LPXTG family cell surface protein Fms3		EMQU_0376	394583	395365	+	44.5722	204.908	85.278	75.1928	0.416177	0.366959
ptsG	PTS family glucose porter, IICBA component	KO: K02802: PTS system, N-acetylglucosamine-specific IIA component [EC:2.7.1.69]; InterPro: IPR001127: Phosphotransferase system, sugar-specific permease EIIA 1 domain; IPR001996: Phosphotransferase system, EIIB component, type 1; IPR003352: Phosphotransferase system, EIIC; IPR010974: Phosphotransferase system, N-acetylglucosamine-specific IIBC component; IPR011055: Duplicated hybrid motif; IPR01…	EMQU_0377	395636	397630	+	41.9048	131.113	26.9836	86.0553	0.205804	0.656344
	hypothetical protein	InterPro: IPR002765: Uncharacterised protein family UPF0145	EMQU_0378	397707	398027	-	42.0561	263.543	338.628	225.029	1.28491	0.853863
	hypothetical protein	InterPro: IPR004701: Phosphotransferase system, fructose subfamily IIA component; IPR012844: Dihydroxyacetone kinase, subunit phosphotransferase	EMQU_0379	398221	398619	+	42.6065	371.649	821.182	483.596	2.20956	1.30122
dhaK2	glycerone kinase subunit K	KO: K05878: dihydroxyacetone kinase, N-terminal domain [EC:2.7.1.-]; InterPro: IPR004006: Dak kinase; IPR012736: Dihydroxyacetone kinase DhaK, subunit 1	EMQU_0380	398621	399604	+	42.378	355.255	651.756	337.882	1.83461	0.951097
dhaL	glycerone kinase subunit L	KO: K05879: dihydroxyacetone kinase, C-terminal domain [EC:2.7.1.-]; InterPro: IPR004007: Dak phosphatase; IPR012737: Dihydroxyacetone kinase, subunit L	EMQU_0381	399619	400224	+	42.9043	270.373	707.24	699.679	2.61579	2.58783
	hypothetical protein		EMQU_0382	400369	401208	-	43.5714	118.075	221.22	84.8153	1.87356	0.718318
	tyrosyl-tRNA synthetase	KO: K01866: tyrosyl-tRNA synthetase [EC:6.1.1.1]; InterPro: IPR001412: Aminoacyl-tRNA synthetase, class I, conserved site; IPR002305: Aminoacyl-tRNA synthetase, class Ic; IPR002307: Tyrosyl-tRNA synthetase; IPR002942: RNA-binding S4; IPR014729: Rossmann-like alpha/beta/alpha sandwich fold; IPR024088: Tyrosyl-tRNA synthetase, bacterial-type; IPR024107: Tyrosyl-tRNA synthetase, bacterial-type, type…	EMQU_0383	401864	403120	+	40.0955	248.704	209.188	112.176	0.841114	0.451043
	decarboxylase	InterPro: IPR002129: Pyridoxal phosphate-dependent decarboxylase; IPR015421: Pyridoxal phosphate-dependent transferase, major region, subdomain 1; IPR015424: Pyridoxal phosphate-dependent transferase, major domain; IPR022397: Tyrosine decarboxylase, bacteria	EMQU_0384	403411	405285	+	39.7867	88.4218	88.064	61.2178	0.995953	0.692338
	amino acid permease family protein	InterPro: IPR002293: Amino acid/polyamine transporter I; IPR004841: Amino acid permease domain	EMQU_0385	405530	406948	+	41.0853	162.406	57.2699	154.459	0.352634	0.951064
	lacI family transcriptional regulator	KO: K02529; InterPro: IPR000843: Transcription regulator HTH, LacI; IPR001761: Periplasmic binding protein/LacI transcriptional regulator; IPR010982: Lambda repressor-like, DNA-binding	EMQU_0386	407464	408480	-	40.5113	110.911	33.0827	49.6215	0.298282	0.447401
	aldose 1-epimerase	KO: K01785: aldose 1-epimerase [EC:5.1.3.3]; InterPro: IPR008183: Aldose 1-epimerase; IPR011013: Glycoside hydrolase-type carbohydrate-binding; IPR014718: Glycoside hydrolase-type carbohydrate-binding, subgroup; IPR015443: Aldose 1-epimerase, subgroup; IPR018052: Aldose 1-epimerase, conserved site	EMQU_0387	408545	409555	-	39.1691	117.821	27.6472	70.959	0.234655	0.602263
pgmB	beta-phosphoglucomutase	KO: K01838: beta-phosphoglucomutase [EC:5.4.2.6]; InterPro: IPR005834: Haloacid dehalogenase-like hydrolase; IPR006402: HAD-superfamily hydrolase, subfamily IA, variant 3; IPR010972: Beta-phosphoglucomutase; IPR010976: Beta-phosphoglucomutase hydrolase; IPR023214: HAD-like domain	EMQU_0388	409548	410213	-	40.991	45.991	34.9741	74.2877	0.760456	1.61527
	trehalose/maltose hydrolase	KO: K00691: maltose phosphorylase [EC:2.4.1.8]; InterPro: IPR005194: Glycoside hydrolase, family 65, C-terminal; IPR005195: Glycoside hydrolase, family 65, central catalytic; IPR005196: Glycoside hydrolase, family 65, N-terminal; IPR008928: Six-hairpin glycosidase-like; IPR011013: Glycoside hydrolase-type carbohydrate-binding; IPR012341: Six-hairpin glycosidase; IPR017045: Maltose phosphorylase/g…	EMQU_0389	410206	412500	-	40.9586	94.2722	11.7281	39.4511	0.124407	0.418481
	PTS system transporter subunit IIABC	KO: K02778: PTS system, glucose-specific IIB component [EC:2.7.1.69]; InterPro: IPR001127: Phosphotransferase system, sugar-specific permease EIIA 1 domain; IPR001996: Phosphotransferase system, EIIB component, type 1; IPR003352: Phosphotransferase system, EIIC; IPR011055: Duplicated hybrid motif; IPR011300: Phosphotransferase system, IIBC component; IPR011535: Phosphotransferase system, glucose-…	EMQU_0390	412785	414947	+	42.9958	155.32	66.0483	69.0783	0.425239	0.444747
	endonuclease/exonuclease/phosphatase family protein	KO: K06896; InterPro: IPR005135: Endonuclease/exonuclease/phosphatase	EMQU_0391	415076	415906	+	39.2298	139.831	147.001	48.8207	1.05128	0.349141
	hypothetical protein		EMQU_0392	416200	417879	-	38.0357	113.155	100.442	46.2361	0.887653	0.408608
pad	phenolic acid decarboxylase	KO: K13727; InterPro: IPR008729: Phenolic acid decarboxylase, bacterial; IPR011038: Calycin-like; IPR012674: Calycin	EMQU_0393	418144	418677	-	37.0787	24.5827	0	85.2388	0	3.46744
	regulator of phenolic acid metabolism PadR	InterPro: IPR005149: Transcription regulator PadR N-terminal; IPR011991: Winged helix-turn-helix transcription repressor DNA-binding; IPR018309: Transcription regulator PadR, C-terminal	EMQU_0394	418781	419329	+	36.2477	108.928	0.942837	21.6287	0.0086556	0.198559
	merR family transcriptional regulator	InterPro: IPR000551: Transcription regulator HTH, MerR; IPR009061: DNA binding domain, putative	EMQU_0395	419517	419984	-	37.8205	125.703	81.8455	44.4012	0.651102	0.353223
lmrB	lmrB family MFS family major facilitator transporter, multidrug:cation symporter	InterPro: IPR001411: Tetracycline resistance protein TetB/drug resistance transporter; IPR004638: Drug resistance transporter EmrB/QacA subfamily; IPR011701: Major facilitator superfamily; IPR016196: Major facilitator superfamily domain, general substrate transporter; IPR020846: Major facilitator superfamily domain	EMQU_0396	420119	421591	+	41.2084	175.596	44.2768	48.0313	0.252151	0.273532
	hypothetical protein		EMQU_0397	421588	422295	+	38.1356	130.475	45.3281	5.59046	0.347409	0.042847
	abrB family transcriptional regulator	InterPro: IPR007159: Transcription regulator AbrB/SpoV, predicted	EMQU_0398	422451	422600	+	29.3333	87.5143	0	19.7902	0	0.226137
	pemK family transcriptional regulator	KO: K07171; InterPro: IPR003477: PemK-like protein; IPR011067: Plasmid maintenance toxin/Cell growth inhibitor	EMQU_0399	422672	423037	+	32.2404	25.2394	0	6.75896	0	0.267794
	ABC transporter ATP-binding protein/permease	KO: K02003; InterPro: IPR003439: ABC transporter-like; IPR003593: ATPase, AAA+ type, core; IPR003838: Permease FtsX-like; IPR017871: ABC transporter, conserved site	EMQU_0400	423222	425558	-	39.0244	170.593	126.027	117.92	0.738756	0.691235
	two component transcriptional regulator, wingedhelix family protein	InterPro: IPR001789: Signal transduction response regulator, receiver domain; IPR001867: Signal transduction response regulator, C-terminal; IPR011006: CheY-like superfamily; IPR011991: Winged helix-turn-helix transcription repressor DNA-binding	EMQU_0401	425704	426372	+	39.1629	100.29	24.759	88.0059	0.246873	0.877511
	sensor histidine kinase	InterPro: IPR003594: ATPase-like, ATP-binding domain; IPR003660: HAMP linker domain; IPR003661: Signal transduction histidine kinase, subgroup 1, dimerisation/phosphoacceptor domain; IPR004358: Signal transduction histidine kinase-related protein, C-terminal; IPR005467: Signal transduction histidine kinase, core; IPR009082: Signal transduction histidine kinase, homodimeric	EMQU_0402	426372	427436	+	39.3427	189.455	15.0668	45.0623	0.0795273	0.237853
	hypothetical protein		EMQU_0403	427637	427963	+	40.9786	142.735	18.9951	31.7733	0.13308	0.222604
	transcriptional regulator	KO: K10947; InterPro: IPR005149: Transcription regulator PadR N-terminal; IPR011991: Winged helix-turn-helix transcription repressor DNA-binding	EMQU_0404	428324	428641	+	38.3648	82.5606	3.25546	90.2385	0.0394311	1.093
	integral membrane protein	InterPro: IPR012963: Protein of unknown function DUF1700	EMQU_0405	428634	429248	+	39.187	132.022	62.2824	204.338	0.471756	1.54775
	hypothetical protein		EMQU_0406	429252	430115	+	36.2269	175.006	39.5402	103.647	0.225936	0.592247
	hypothetical protein		EMQU_0407	430311	430802	+	37.1951	106.725	177.799	130.728	1.66596	1.22491
	hypothetical protein	InterPro: IPR001107: Band 7 protein; IPR001972: Stomatin	EMQU_0408	430828	431697	+	39.4253	328.039	44.6222	135.916	0.136027	0.414328
	hypothetical protein	InterPro: IPR006542: Conserved hypothetical protein CHP01655	EMQU_0409	431911	432288	+	37.3016	748.579	866.804	1248.67	1.15793	1.66805
	ABC transporter ATP-binding protein	KO: K02003; InterPro: IPR003439: ABC transporter-like; IPR003593: ATPase, AAA+ type, core	EMQU_0410	432281	433033	+	38.5126	838.081	1913.74	1473.1	2.28348	1.7577
	peptide ABC superfamily ATP binding cassette transporter, membrane protein	KO: K02004; InterPro: IPR003838: Permease FtsX-like	EMQU_0411	433048	434862	+	36.4187	708.258	1824.35	1517.8	2.57583	2.143
	transcriptional regulator GlvR	KO: K03481; InterPro: IPR001347: Sugar isomerase (SIS)	EMQU_0412	435314	435820	-	34.9112	74.7985	11.2304	17.5653	0.150141	0.234835
	hypothetical protein		EMQU_0413	436234	436431	-	32.3232	105.587	0	7.4963	0	0.0709966
	bifunctional PTS system maltose and glucose-specific transporter subunits IICB	KO: K02750: PTS system, arbutin-like IIC component; InterPro: IPR001996: Phosphotransferase system, EIIB component, type 1; IPR003352: Phosphotransferase system, EIIC; IPR010975: Phosphotransferase system, alpha-glucoside-specific IIBC component; IPR011535: Phosphotransferase system, glucose-like IIB component; IPR013013: Phosphotransferase system, EIIC component, type 1; IPR018113: Phosphotransf…	EMQU_0414	436739	438328	+	39.0566	65.7427	21.486	36.4066	0.326819	0.553773
malH	maltose-6'-phosphate glucosidase	KO: K01232: maltose-6'-phosphate glucosidase [EC:3.2.1.122]; InterPro: IPR001088: Glycoside hydrolase, family 4; IPR015955: Lactate dehydrogenase/glycoside hydrolase, family 4, C-terminal; IPR016040: NAD(P)-binding domain; IPR019802: Glycoside hydrolase, family 4, conserved site; IPR022616: Glycosyl hydrolase, family 4, C-terminal	EMQU_0415	438342	439673	+	39.7898	124.468	26.4249	72.4305	0.212303	0.581922
	lacY gene product	InterPro: IPR011701: Major facilitator superfamily; IPR016196: Major facilitator superfamily domain, general substrate transporter	EMQU_0416	439742	440908	+	37.5321	91.6554	16.4112	111.924	0.179053	1.22114
	hypothetical protein HMPREF9087_1397	InterPro: IPR006339: Transcription regulator AbrB; IPR007159: Transcription regulator AbrB/SpoV, predicted	EMQU_0417	440988	441263	+	36.5942	22.9003	11.2526	39.4371	0.491372	1.72212
	hypothetical protein		EMQU_0418	441257	441385	+	33.3333	195.984	0	34.5178	0	0.176126
	C40 family peptidase	InterPro: IPR000064: NLP/P60; IPR002901: Mannosyl-glycoprotein endo-beta-N-acetylglucosamidase; IPR013338: Lysozyme domain, subfamily 2	EMQU_0419	441729	443864	-	40.9644	117.906	51.6163	78.29	0.437776	0.664005
rbsR	ribose transcriptional regulator	KO: K02529; InterPro: IPR000843: Transcription regulator HTH, LacI; IPR001761: Periplasmic binding protein/LacI transcriptional regulator; IPR010982: Lambda repressor-like, DNA-binding	EMQU_0420	444265	445293	-	40.1361	124.737	16.6	103.375	0.13308	0.828741
	ABC transporter ATP-binding protein	KO: K02003; InterPro: IPR003439: ABC transporter-like; IPR003593: ATPase, AAA+ type, core; IPR017871: ABC transporter, conserved site	EMQU_0421	445853	446554	+	39.0313	194.615	118.713	97.9645	0.609989	0.503377
	permease domain-containing protein	KO: K02004; InterPro: IPR003838: Permease FtsX-like	EMQU_0422	446566	449277	+	40.118	210.288	148.109	238.986	0.704314	1.13647
	antibiotic biosynthesis monooxygenase	InterPro: IPR007138: Antibiotic biosynthesis monooxygenase; IPR011008: Dimeric alpha-beta barrel	EMQU_0423	449295	449594	+	39.6667	359.781	100.073	148.427	0.278149	0.412548
	permease	InterPro: IPR002549: Uncharacterised protein family UPF0118	EMQU_0424	449752	450615	-	38.3102	99.6015	12.581	59.5539	0.126313	0.597922
	hypothetical protein		EMQU_0425	450728	450895	+	32.7381	60.7738	36.9727	73.6244	0.608365	1.21145
	alpha amylase family protein	KO: K01226: trehalose-6-phosphate hydrolase [EC:3.2.1.93]; InterPro: IPR006047: Glycosyl hydrolase, family 13, catalytic domain; IPR006589: Glycosyl hydrolase, family 13, subfamily, catalytic domain; IPR012769: Alpha,alpha-phosphotrehalase; IPR013780: Glycosyl hydrolase, family 13, all-beta; IPR013781: Glycoside hydrolase, subgroup, catalytic domain; IPR015902: Alpha amylase; IPR017853: Glycoside…	EMQU_0426	451202	452833	+	39.5221	122.441	69.1425	124.598	0.564699	1.01762
	hypothetical protein	InterPro: IPR002549: Uncharacterised protein family UPF0118	EMQU_0427	452996	454177	-	37.5635	120.108	151.957	95.0166	1.26517	0.791093
	zinc-binding lipoprotein AdcA	KO: K09815: zinc transport system substrate-binding protein; InterPro: IPR006127: ABC transporter, metal-binding lipoprotein; IPR006128: Adhesion lipoprotein; IPR006129: Adhesin B; IPR011038: Calycin-like; IPR012674: Calycin; IPR015304: YodA	EMQU_0428	454695	456299	+	38.3801	67.8546	29.0253	22.8112	0.427757	0.336177
agrA_2	accessory gene regulator protein A	InterPro: IPR001789: Signal transduction response regulator, receiver domain; IPR007492: LytTr, DNA-binding domain; IPR011006: CheY-like superfamily	EMQU_0429	456402	457130	-	35.2538	287.446	398.331	704.467	1.38576	2.45078
agrC_2	accessory gene regulator C	KO: K07706: two-component system, AgrA family, sensor histidine kinase AgrC [EC:2.7.13.-]; InterPro: IPR003594: ATPase-like, ATP-binding domain	EMQU_0430	457135	458418	-	33.2555	309.738	277.353	495.141	0.895442	1.59858
	hypothetical protein		EMQU_0431	458449	458577	-	25.5814	2310.35	1697.3	3451.78	0.734653	1.49405
agrB	accessory gene regulator B	KO: K07813: accessory gene regulator B; InterPro: IPR006741: Accessory gene regulator B	EMQU_0432	458558	459160	-	34.4942	6141.48	6340.17	6674.69	1.03235	1.08682
	hypothetical protein		EMQU_0433	459737	459952	+	34.7222	213.834	31.1529	219.891	0.145687	1.02833
	ATP-dependent DNA helicase	InterPro: IPR000212: DNA helicase, UvrD/REP type; IPR014016: Helicase, superfamily 1, UvrD-related; IPR014017: DNA helicase, UvrD-like, C-terminal	EMQU_0434	460265	462460	+	35.7468	123.097	112.198	72.3209	0.911454	0.587509
	regulatory protein Spx	KO: K16509; InterPro: IPR006504: Transcriptional regulator Spx/MgsR; IPR006660: Arsenate reductase-like; IPR012336: Thioredoxin-like fold	EMQU_0435	462710	463117	+	34.0686	266.928	334.929	420.785	1.25475	1.5764
	arsenate reductase	InterPro: IPR006660: Arsenate reductase-like; IPR012336: Thioredoxin-like fold	EMQU_0436	463135	463491	+	31.9328	152.53	17.3989	23.5598	0.114068	0.15446
	conserved domain protein		EMQU_0437	466978	467169	+	48.4375	0	0	0	#DIV/0!	#DIV/0!
	hypothetical protein HMPREF0357_10597		EMQU_0438	468416	468577	+	54.321	0	0	0	#DIV/0!	#DIV/0!
	glutathione peroxidase	KO: K00432: glutathione peroxidase [EC:1.11.1.9]; InterPro: IPR000889: Glutathione peroxidase; IPR012336: Thioredoxin-like fold	EMQU_0439	469519	469989	-	39.2781	328.256	390.136	252.105	1.18851	0.768013
luxS	S-ribosylhomocysteine lyase	KO: K07173: S-ribosylhomocysteine lyase [EC:4.4.1.21]; InterPro: IPR003815: S-ribosylhomocysteinase (LuxS); IPR011249: Metalloenzyme, LuxS/M16 peptidase-like, metal-binding	EMQU_0440	470287	470745	-	38.78	382.385	301.098	354.629	0.78742	0.927413
metC	cystathionine gamma-synthase	KO: K01760: cystathionine beta-lyase [EC:4.4.1.8]; InterPro: IPR000277: Cys/Met metabolism, pyridoxal phosphate-dependent enzyme; IPR015421: Pyridoxal phosphate-dependent transferase, major region, subdomain 1; IPR015422: Pyridoxal phosphate-dependent transferase, major region, subdomain 2; IPR015424: Pyridoxal phosphate-dependent transferase, major domain	EMQU_0441	470898	472046	-	40.2959	268.695	136.5	39.1843	0.508009	0.145832
cysK	cysteine synthase	KO: K01738: cysteine synthase A [EC:2.5.1.47]; InterPro: IPR001216: Cysteine synthase/cystathionine beta-synthase P-phosphate-binding site; IPR001926: Pyridoxal phosphate-dependent enzyme, beta subunit	EMQU_0442	472095	473012	-	40.6318	188.544	134.761	24.7917	0.714744	0.13149
efp	elongation factor P	KO: K02356; InterPro: IPR001059: Translation elongation factor P/YeiP, central; IPR008991: Translation protein SH3-like; IPR011768: Translation elongation factor P; IPR012340: Nucleic acid-binding, OB-fold; IPR013185: Translation elongation factor, KOW-like; IPR013852: Translation elongation factor P/YeiP, conserved site; IPR014722: Translation protein SH3-like, subgroup; IPR015365: Elongation fa…	EMQU_0443	473386	473946	+	37.4332	479.257	167.003	487.7	0.348462	1.01762
	hypothetical protein	InterPro: IPR007737: M trans-acting positive regulator	EMQU_0444	474008	475504	-	33.9345	88.9888	31.8108	42.3038	0.35747	0.475383
	von Willebrand factor type A domain-containing protein	InterPro: IPR002035: von Willebrand factor, type A; IPR008454: Collagen-binding surface protein Cna-like, B-type domain; IPR008970: Collagen-binding surface protein Cna, B-type domain	EMQU_0445	475859	479302	+	40.7085	89.2196	7.36447	51.4293	0.0825432	0.576435
	cell wall surface anchor family protein	InterPro: IPR008454: Collagen-binding surface protein Cna-like, B-type domain	EMQU_0446	479299	480651	+	37.9897	93.4291	39.4047	32.1792	0.421761	0.344424
ebpCfm	pilus subunit protein EbpCfm	InterPro: IPR001899: Surface protein from Gram-positive cocci; IPR008454: Collagen-binding surface protein Cna-like, B-type domain; IPR019931: LPXTG-motif cell wall anchor; IPR019948: Gram-positive anchor	EMQU_0447	480648	482516	+	39.5934	61.6518	36.5572	74.3854	0.592964	1.20654
	sortase	KO: K07284; InterPro: IPR005754: Peptidase C60, sortase A/B; IPR023365: Peptidase C60A/B, sortase domain	EMQU_0448	482556	483401	+	37.9433	91.3762	18.3552	73.1022	0.200875	0.800014
	hemolysin III	KO: K11068; InterPro: IPR004254: Hly-III-related; IPR005744: HylII	EMQU_0449	483493	484134	+	38.785	395.314	141.095	369.14	0.356919	0.933791
	diaminopimelate decarboxylase	KO: K01586: diaminopimelate decarboxylase [EC:4.1.1.20]; InterPro: IPR000183: Ornithine/DAP/Arg decarboxylase; IPR002986: Diaminopimelate decarboxylase, LysA; IPR009006: Alanine racemase/group IV decarboxylase, C-terminal; IPR022643: Orn/DAP/Arg decarboxylase 2, C-terminal; IPR022644: Orn/DAP/Arg decarboxylase 2, N-terminal; IPR022653: Orn/DAP/Arg decarboxylase 2, pyridoxal-phosphate binding site	EMQU_0450	484408	485664	+	41.4479	270.364	171.716	179.088	0.635128	0.662398
dapF	diaminopimelate epimerase	KO: K01778: diaminopimelate epimerase [EC:5.1.1.7]; InterPro: IPR001653: Diaminopimelate epimerase, DapF; IPR018510: Diaminopimelate epimerase, active site	EMQU_0451	485651	486457	+	43.4944	290.991	362.396	399.115	1.24539	1.37157
	dihydrodipicolinate synthase	KO: K01714: dihydrodipicolinate synthase [EC:4.2.1.52]; InterPro: IPR002220: Dihydrodipicolinate synthetase-like; IPR005263: Dihydrodipicolinate synthase, DapA; IPR013785: Aldolase-type TIM barrel; IPR020624: Dihydrodipicolinate synthetase, conserved site; IPR020625: Dihydrodipicolinate synthetase, active site	EMQU_0452	486454	487335	+	43.0839	276.169	504.706	575.532	1.82752	2.08398
dapB	dihydrodipicolinate reductase	KO: K00215: dihydrodipicolinate reductase [EC:1.3.1.26]; InterPro: IPR000846: Dihydrodipicolinate reductase, N-terminal; IPR011770: Dihydrodipicolinate reductase, bacterial/plant; IPR016040: NAD(P)-binding domain; IPR022663: Dihydrodipicolinate reductase, C-terminal; IPR022664: Dihydrodipicolinate reductase, conserved site; IPR023940: Dihydrodipicolinate reductase, bacterial	EMQU_0453	487332	488051	+	44.3056	217.435	549.968	519.494	2.52934	2.38919
	2,3,4,5-tetrahydropyridine-2,6-carboxylate N-succinyltransferase	KO: K05822: tetrahydrodipicolinate N-acetyltransferase [EC:2.3.1.89]; InterPro: IPR001451: Bacterial transferase hexapeptide repeat; IPR011004: Trimeric LpxA-like; IPR013710: Tetrahydrodipicolinate acetyltransferase, N-terminal; IPR018357: Hexapeptide transferase, conserved site; IPR019873: Tetrahydropyridine-2,6-dicarboxylate N-acetyltransferase, DapH	EMQU_0454	488053	488748	+	45.6897	179.527	361.44	593.565	2.01329	3.30627
asd	aspartate-semialdehyde dehydrogenase	KO: K00133: aspartate-semialdehyde dehydrogenase [EC:1.2.1.11]; InterPro: IPR000534: Semialdehyde dehydrogenase, NAD-binding; IPR005986: Aspartate-semialdehyde dehydrogenase, beta-type; IPR012080: Aspartate-semialdehyde dehydrogenase; IPR012280: Semialdehyde dehydrogenase, dimerisation domain; IPR016040: NAD(P)-binding domain	EMQU_0455	488769	489764	+	44.4779	230.404	572.185	295.065	2.48341	1.28065
lysC	aspartate kinase	KO: K00928: aspartate kinase [EC:2.7.2.4]; InterPro: IPR001048: Aspartate/glutamate/uridylate kinase; IPR001341: Aspartate kinase domain; IPR018042: Aspartate kinase, conserved site	EMQU_0456	489761	491110	+	42.1481	207.801	383.804	369.418	1.84697	1.77774
	amidohydrolase	KO: K05823: N-acetyldiaminopimelate deacetylase [EC:3.5.1.47]; InterPro: IPR002933: Peptidase M20; IPR011650: Peptidase M20, dimerisation; IPR017439: Amidohydrolase	EMQU_0457	491070	492164	+	44.1096	283.722	562.998	160.852	1.98433	0.566935
	aromatic amino acid aminotransferase	KO: K00841: aminotransferase [EC:2.6.1.-]; InterPro: IPR001176: 1-aminocyclopropane-1-carboxylate synthase; IPR004838: Aminotransferases, class-I, pyridoxal-phosphate-binding site; IPR004839: Aminotransferase, class I/classII; IPR015421: Pyridoxal phosphate-dependent transferase, major region, subdomain 1; IPR015422: Pyridoxal phosphate-dependent transferase, major region, subdomain 2; IPR015424:…	EMQU_0458	492200	493372	+	43.6488	377.181	962.865	571.943	2.55279	1.51636
	NADH peroxidase	KO: K05910; InterPro: IPR004099: Pyridine nucleotide-disulphide oxidoreductase, dimerisation; IPR013027: FAD-dependent pyridine nucleotide-disulphide oxidoreductase; IPR016156: FAD/NAD-linked reductase, dimerisation; IPR023753: Pyridine nucleotide-disulphide oxidoreductase, FAD/NAD(P)-binding domain	EMQU_0459	493493	494872	+	41.5942	4007.9	7753.01	4604.1	1.93443	1.14876
	hypothetical protein		EMQU_0460	495162	495443	+	33.6879	25.8612	5.50657	12.2812	0.212928	0.474888
	hypothetical protein		EMQU_0461	495827	496093	+	34.4569	156.601	21.3251	55.5905	0.136175	0.354983
	rpiR family phosphosugar-binding transcriptional regulator	InterPro: IPR000281: Helix-turn-helix protein RpiR; IPR001347: Sugar isomerase (SIS); IPR011991: Winged helix-turn-helix transcription repressor DNA-binding	EMQU_0462	496223	496975	-	39.8406	120.095	46.0563	54.5348	0.383499	0.454098
	1-phosphofructokinase	KO: K00882: 1-phosphofructokinase [EC:2.7.1.56]; InterPro: IPR011611: Carbohydrate/purine kinase; IPR017583: Tagatose/fructose phosphokinase; IPR022463: 1-phosphofructokinase	EMQU_0463	497131	498063	+	40.836	180.823	61.0267	60.4525	0.337494	0.334318
	PTS family fructose porter component IIBC	KO: K02770: PTS system, fructose-specific IIC component; InterPro: IPR003353: Phosphotransferase system, fructose-specific IIB subunit; IPR003501: Phosphotransferase system, EIIB component, type 2/3; IPR006327: Phosphotransferase system, fructose IIC component; IPR013011: Phosphotransferase system, EIIB component, type 2; IPR013014: Phosphotransferase system, EIIC component, type 2	EMQU_0464	498063	499454	+	44.3247	140.059	128.661	61.1336	0.918616	0.436484
	PTS system transporter subunit IIA	KO: K02768: PTS system, fructose-specific IIA component [EC:2.7.1.69]; InterPro: IPR002178: Phosphotransferase system, phosphoenolpyruvate-dependent sugar EIIA 2; IPR004715: Phosphotransferase system, IIA component fructose subfamily; IPR016152: Phosphotransferase/anion transporter	EMQU_0465	499471	499929	+	41.1765	141.938	75.5563	24.7917	0.53232	0.174666
lacD-1	tagatose 1,6-diphosphate aldolase	KO: K01635: tagatose 1,6-diphosphate aldolase [EC:4.1.2.40]; InterPro: IPR002915: Deoxyribose-phosphate aldolase/phospho-2-dehydro-3-deoxyheptonate aldolase; IPR005927: Tagatose 1,6-diphosphate aldolase; IPR013785: Aldolase-type TIM barrel	EMQU_0466	499926	500909	+	42.2764	126.983	48.3951	24.1344	0.381116	0.190061
	gntR family transcriptional regulator	KO: K03710; InterPro: IPR000524: Transcription regulator HTH, GntR; IPR011663: UbiC transcription regulator-associated; IPR011991: Winged helix-turn-helix transcription repressor DNA-binding	EMQU_0467	501275	502018	+	40.1882	84.2992	27.1332	67.1644	0.321868	0.796739
	sugar isomerase	KO: K02082; InterPro: IPR001347: Sugar isomerase (SIS)	EMQU_0468	502020	503198	+	41.9847	189.693	45.2202	31.473	0.238387	0.165916
lacD2	tagatose 1,6-diphosphate aldolase	KO: K01635: tagatose 1,6-diphosphate aldolase [EC:4.1.2.40]; InterPro: IPR002915: Deoxyribose-phosphate aldolase/phospho-2-dehydro-3-deoxyheptonate aldolase; IPR005927: Tagatose 1,6-diphosphate aldolase; IPR013785: Aldolase-type TIM barrel	EMQU_0469	503219	504196	+	41.002	156.595	44.4579	26.306	0.283904	0.167988
	PTS system transporter subunit IIB	KO: K02794: PTS system, mannose-specific IIB component [EC:2.7.1.69]; InterPro: IPR004720: Phosphotransferase system, sorbose subfamily IIB component	EMQU_0470	504254	504733	+	40.2083	115.47	14.0188	85.5515	0.121406	0.740897
	PTS system, mannose/fructose/sorbose-specific IIC component	KO: K02795: PTS system, mannose-specific IIC component; InterPro: IPR004700: Phosphotransferase system, sorbose-specific IIC subunit	EMQU_0471	504747	505637	+	41.5264	147.33	39.5039	105.503	0.268131	0.716101
	PTS system transporter subunit IID	KO: K02796: PTS system, mannose-specific IID component; InterPro: IPR004704: Phosphotransferase system, mannose/fructose/sorbose family IID component	EMQU_0472	505624	506433	+	41.2346	208.882	23.0052	136.211	0.110135	0.652094
	PTS system, mannose/fructose/sorbose-specific IIA component	KO: K02793: PTS system, mannose-specific IIA component [EC:2.7.1.69]; InterPro: IPR004701: Phosphotransferase system, fructose subfamily IIA component	EMQU_0473	506447	506848	+	42.7861	153.597	77.2563	228.917	0.502979	1.49037
bglH	beta-glucosidase	KO: K01223: 6-phospho-beta-glucosidase [EC:3.2.1.86]; InterPro: IPR001360: Glycoside hydrolase, family 1; IPR013781: Glycoside hydrolase, subgroup, catalytic domain; IPR017853: Glycoside hydrolase, superfamily; IPR018120: Glycoside hydrolase, family 1, active site	EMQU_0474	507024	508454	+	41.0901	132.505	17.7241	81.9407	0.133762	0.618398
	hypothetical protein		EMQU_0475	508736	509020	+	32.2807	129.651	107.156	39.9277	0.826496	0.307963
	amidinotransferase	InterPro: IPR003198: Amidinotransferase	EMQU_0476	509053	510021	+	40.8669	136.475	107.37	113.35	0.786737	0.830555
	aldo/keto reductase family protein	KO: K01104; InterPro: IPR016130: Protein-tyrosine phosphatase, active site	EMQU_0477	510022	510828	+	38.7856	115.071	119.302	85.8312	1.03677	0.745897
	hypothetical protein		EMQU_0478	511416	511964	+	40.6193	77.0466	0	32.443	0	0.421083
	lipoprotein	InterPro: IPR005046: Protein of unknown function DUF285, lipoprotein predicted; IPR011889: Bacterial surface protein 26-residue repeat	EMQU_0479	511965	512237	+	34.0659	101.512	117.554	16.3106	1.15803	0.160676
	oxidoreductase	KO: K00219; InterPro: IPR001155: NADH: flavin oxidoreductase/NADH oxidase, N-terminal; IPR013785: Aldolase-type TIM barrel	EMQU_0480	512383	513585	-	38.9027	143.069	77.0187	31.6677	0.538334	0.221346
	succinate-semialdehyde dehydrogenase	KO: K00128: aldehyde dehydrogenase (NAD+) [EC:1.2.1.3]; InterPro: IPR012394: Aldehyde dehydrogenase NAD(P)-dependent; IPR015590: Aldehyde dehydrogenase domain; IPR016160: Aldehyde dehydrogenase, conserved site; IPR016161: Aldehyde/histidinol dehydrogenase; IPR016162: Aldehyde dehydrogenase, N-terminal; IPR016163: Aldehyde dehydrogenase, C-terminal	EMQU_0481	513598	514968	-	37.7097	130.502	2.64283	40.4177	0.0202513	0.30971
	transcription regulator	InterPro: IPR001845: HTH ArsR-type DNA-binding domain; IPR011991: Winged helix-turn-helix transcription repressor DNA-binding	EMQU_0482	515045	515341	-	34.6801	124.412	73.1984	24.9877	0.588353	0.200846
	transcriptional regulator	InterPro: IPR007737: M trans-acting positive regulator; IPR011608: PRD; IPR011991: Winged helix-turn-helix transcription repressor DNA-binding; IPR013196: Helix-turn-helix, type 11	EMQU_0483	515542	517020	+	34.4828	102.235	16.7989	49.8436	0.164317	0.48754
	hypothetical membrane protein	InterPro: IPR001899: Surface protein from Gram-positive cocci; IPR019931: LPXTG-motif cell wall anchor	EMQU_0484	517270	517623	+	38.9831	173.051	178.388	293.499	1.03084	1.69603
	wxL domain surface protein		EMQU_0485	517642	518454	+	40.2214	843.807	255.307	551.96	0.302566	0.654131
	hypothetical protein	InterPro: IPR010317: Protein of unknown function DUF916, cell surface putative; IPR021759: Domain of unknown function DUF3324, C-terminal	EMQU_0486	518584	519651	+	40.4494	457.966	112.441	476.689	0.245523	1.04088
	wxL domain surface protein		EMQU_0487	519657	523106	+	38.9275	303.27	172.539	347.62	0.568929	1.14624
	cardiolipin synthetase	KO: K06131: cardiolipin synthase [EC:2.7.8.-]; InterPro: IPR001736: Phospholipase D/Transphosphatidylase	EMQU_0488	523469	524998	+	39.3464	177.634	145.474	317.873	0.818953	1.78948
	squalene synthase	InterPro: IPR002937: Amine oxidase; IPR014105: Zeta-phytoene desaturase	EMQU_0489	525259	526755	+	40.481	439.747	543.55	425.682	1.23605	0.968014
	conserved hypothetical protein	InterPro: IPR001173: Glycosyl transferase, family 2	EMQU_0490	526771	527850	+	40.8333	229.14	606.763	280.362	2.648	1.22354
	conserved hypothetical protein		EMQU_0491	527860	528351	+	39.8374	268.788	313.516	252.406	1.16641	0.939051
	DNA-damage-inducible protein J	KO: K07473	EMQU_0492	528418	528537	+	32.5	247.147	219.987	57.7215	0.890108	0.233552
	hypothetical protein	InterPro: IPR007712: Plasmid stabilisation system; IPR012753: Addiction module toxin, RelE/StbE	EMQU_0493	528681	528941	+	33.3333	301.773	358.961	238.848	1.1895	0.79148
	hypothetical protein		EMQU_0494	529658	529798	+	38.2979	89.6521	0	0	0	0
rpoD	DNA-directed RNA polymerase sigma subunit RpoD	KO: K03088; InterPro: IPR007627: RNA polymerase sigma-70 region 2; IPR011991: Winged helix-turn-helix transcription repressor DNA-binding; IPR013249: RNA polymerase sigma factor 70, region 4 type 2; IPR013324: RNA polymerase sigma factor, region 3/4; IPR013325: RNA polymerase sigma factor, region 2; IPR014284: RNA polymerase sigma-70	EMQU_0495	529896	530324	+	32.634	53.2656	20.5116	243.341	0.385082	4.56845
	hypothetical protein	InterPro: IPR021729: Domain of unknown function DUF3298	EMQU_0496	530343	531209	+	36.6782	91.4061	16.1196	191.739	0.176351	2.09767
	hypothetical protein		EMQU_0497	531359	531598	-	33.75	137.754	2.15674	61.8445	0.0156565	0.448949
	hypothetical protein		EMQU_0498	531615	532124	-	40.3922	65.7787	56.8364	217.305	0.864055	3.30357
dinB2	Y family DNA-directed DNA polymerase	InterPro: IPR001126: DNA-repair protein, UmuC-like; IPR017961: DNA polymerase, Y-family, little finger domain; IPR017962: DNA polymerase IV/DinB homologue, little finger domain; IPR017963: DNA-repair protein, UmuC-like, N-terminal; IPR024728: DNA polymerase type-Y, HhH motif	EMQU_0499	532087	533337	-	43.6451	138.356	101.786	90.1713	0.735678	0.651732
	group II intron reverse transcriptase maturase	InterPro: IPR000477: Reverse transcriptase	EMQU_0500	533509	535371	-	39.1304	2321.87	1475.61	2152.71	0.635529	0.927145
	hypothetical protein		EMQU_0501	535557	535751	-	43.5897	2184.12	1244.94	1344.72	0.569995	0.615682
	3-deoxy-7-phosphoheptulonate synthase	KO: K03856: 3-deoxy-7-phosphoheptulonate synthase [EC:2.5.1.54]; InterPro: IPR006218: DAHP synthetase I/KDSA; IPR006268: Phospho-2-dehydro-3-deoxyheptonate aldolase, subtype 2; IPR013785: Aldolase-type TIM barrel	EMQU_0502	536715	537734	+	42.9412	680.667	435.915	402.595	0.640424	0.591472
aroB	3-dehydroquinate synthase	KO: K01735: 3-dehydroquinate synthase [EC:4.2.3.4]; InterPro: IPR016037: 3-dehydroquinate synthase AroB	EMQU_0503	537749	538813	+	43.0986	633.645	444.227	622.045	0.701066	0.981693
	chorismate synthase	KO: K01736: chorismate synthase [EC:4.2.3.5]; InterPro: IPR000453: Chorismate synthase; IPR020541: Chorismate synthase, conserved site	EMQU_0504	538814	539980	+	45.3299	627.007	248.385	714.789	0.396145	1.14
	prephenate dehydrogenase	KO: K04517: prephenate dehydrogenase [EC:1.3.1.12]; InterPro: IPR002912: Amino acid-binding ACT; IPR003099: Prephenate dehydrogenase; IPR008927: 6-phosphogluconate dehydrogenase, C-terminal-like; IPR016040: NAD(P)-binding domain	EMQU_0505	539994	541073	+	40.463	599.635	233.886	826.425	0.390048	1.37821
	3-phosphoshikimate 1-carboxyvinyltransferase	KO: K00800: 3-phosphoshikimate 1-carboxyvinyltransferase [EC:2.5.1.19]; InterPro: IPR001986: Enolpyruvate transferase domain; IPR006264: 3-phosphoshikimate 1-carboxyvinyltransferase; IPR013792: RNA 3'-terminal phosphate cyclase/enolpyruvate transferase, alpha/beta; IPR020683: Ankyrin repeat-containing domain; IPR023193: 3-phosphoshikimate 1-carboxyvinyltransferase, conserved site	EMQU_0506	541078	542361	+	42.9128	584.262	122.551	725.565	0.209754	1.24185
	shikimate kinase	KO: K00891: shikimate kinase [EC:2.7.1.71]; InterPro: IPR000623: Shikimate kinase; IPR023000: Shikimate kinase, conserved site	EMQU_0507	542361	542867	+	41.0256	666.474	205.209	822.641	0.307903	1.23432
	prephenate dehydratase	KO: K04518: prephenate dehydratase [EC:4.2.1.51]; InterPro: IPR001086: Prephenate dehydratase; IPR002912: Amino acid-binding ACT; IPR018528: Prephenate dehydratase, conserved site	EMQU_0508	542864	543730	+	42.5606	652.179	308.063	420	0.472359	0.643995
	hypothetical protein	InterPro: IPR012933: Uncharacterised protein family UPF0395	EMQU_0509	543894	544055	+	38.8889	141.055	63.9034	36.6486	0.453038	0.259817
	toxin-antitoxin system, antitoxin component, HicB family	InterPro: IPR005357: Uncharacterised domain UPF0150	EMQU_0510	544090	544545	+	36.8421	114.084	36.324	47.7396	0.318397	0.418459
	pfpI family intracellular protease	KO: K05520; InterPro: IPR002818: ThiJ/PfpI; IPR006286: Peptidase C56, PfpI	EMQU_0511	544670	545179	+	41.3725	428.038	200.957	136.785	0.469484	0.319564
galK	galactokinase	KO: K00849: galactokinase [EC:2.7.1.6]; InterPro: IPR000705: Galactokinase; IPR006203: GHMP kinase, ATP-binding, conserved site; IPR006204: GHMP kinase; IPR006206: Mevalonate/galactokinase; IPR013750: GHMP kinase, C-terminal; IPR014721: Ribosomal protein S5 domain 2-type fold, subgroup; IPR019539: Galactokinase galactose-binding domain; IPR019741: Galactokinase, conserved site; IPR020568: Ribosom…	EMQU_0512	545451	546617	-	41.6452	89.989	107.338	66.9849	1.19279	0.744368
	aldose 1-epimerase	KO: K01785: aldose 1-epimerase [EC:5.1.3.3]; InterPro: IPR008183: Aldose 1-epimerase; IPR011013: Glycoside hydrolase-type carbohydrate-binding; IPR014718: Glycoside hydrolase-type carbohydrate-binding, subgroup; IPR015443: Aldose 1-epimerase, subgroup; IPR018052: Aldose 1-epimerase, conserved site	EMQU_0513	546614	547654	-	43.708	158.794	156.628	172.998	0.986357	1.08945
	MSM (multiple sugar metabolism) operon regulatory protein	InterPro: IPR003313: Transcription regulator HTH, AraC, arabinose-binding/dimerisation; IPR009057: Homeodomain-like; IPR012287: Homeodomain-related; IPR018060: Helix-turn-helix, AraC type, DNA binding; IPR018062: Helix-turn-helix, AraC type, subdomain 2	EMQU_0514	547882	548787	+	38.3002	137.915	108.551	37.134	0.787087	0.269253
	NADPH dehydrogenase	InterPro: IPR003680: Flavodoxin-like fold	EMQU_0515	548856	549533	+	40.2655	323.41	351.186	153.243	1.08588	0.473835
	hypothetical protein		EMQU_0516	549533	549700	+	41.0714	234.413	227.998	76.5694	0.972633	0.326643
	lysM family surface protein	InterPro: IPR002482: Peptidoglycan-binding Lysin subgroup	EMQU_0517	549818	550717	+	45.4444	998.311	836.24	1196.76	0.837654	1.19878
	gntR family transcriptional regulator	InterPro: IPR000524: Transcription regulator HTH, GntR; IPR011663: UbiC transcription regulator-associated; IPR011991: Winged helix-turn-helix transcription repressor DNA-binding	EMQU_0518	550907	551614	+	39.2655	159.317	24.1262	211.04	0.151436	1.32466
	hypothetical protein		EMQU_0519	552323	552550	+	31.1404	31.9862	27.243	0	0.851711	0
	hypothetical protein		EMQU_0520	552722	552880	+	30.8176	85.6185	100.919	31.1167	1.17871	0.363435
	galactonate dehydratase	KO: K08323; InterPro: IPR001354: Mandelate racemase/muconate lactonizing enzyme; IPR013341: Mandelate racemase/muconate lactonizing enzyme, N-terminal; IPR013342: Mandelate racemase/muconate lactonizing enzyme, C-terminal; IPR018110: Mandelate racemase/muconate lactonizing enzyme, conserved site	EMQU_0521	553008	554207	-	43.1667	96.8329	65.5649	111.32	0.677093	1.14961
bglP	PTS family glucose/glucoside (glc) porter component IIABC	InterPro: IPR001127: Phosphotransferase system, sugar-specific permease EIIA 1 domain; IPR001996: Phosphotransferase system, EIIB component, type 1; IPR003352: Phosphotransferase system, EIIC; IPR011055: Duplicated hybrid motif; IPR013013: Phosphotransferase system, EIIC component, type 1; IPR018113: Phosphotransferase system EIIB/cysteine, phosphorylation site	EMQU_0522	554481	556310	+	42.6776	137.355	10.1826	91.6515	0.0741335	0.667258
	hypothetical protein		EMQU_0523	556723	557022	+	40	105.341	18.9793	32.9837	0.18017	0.313113
	transcriptional regulator	InterPro: IPR002577: Helix-turn-helix, HxlR type; IPR011991: Winged helix-turn-helix transcription repressor DNA-binding	EMQU_0524	557154	557375	-	43.2432	63.5114	2.33161	40.1153	0.0367117	0.631625
	S-(hydroxymethyl)glutathione dehydrogenase	KO: K00121: S-(hydroxymethyl)glutathione dehydrogenase / alcohol dehydrogenase [EC:1.1.1.284 1.1.1.1]; InterPro: IPR002085: Alcohol dehydrogenase superfamily, zinc-type; IPR002328: Alcohol dehydrogenase, zinc-type, conserved site; IPR011032: GroES-like; IPR013149: Alcohol dehydrogenase, C-terminal; IPR013154: Alcohol dehydrogenase GroES-like; IPR014183: Alcohol dehydrogenase class III/S-(hydroxym…	EMQU_0525	557715	558854	+	44.386	228.168	224.755	199.638	0.98504	0.874961
	putative S-formyl-glutathione hydrolase	KO: K01070: S-formylglutathione hydrolase [EC:3.1.2.12]; InterPro: IPR000801: Putative esterase; IPR014186: S-formylglutathione hydrolase	EMQU_0526	558835	559677	+	44.0095	194.361	82.8925	36.3877	0.426487	0.187217
	hypothetical protein	InterPro: IPR003740: Protein of unknown function DUF161	EMQU_0527	560061	560657	+	30.3183	74.1094	23.4098	169.062	0.315882	2.28125
	glyoxalase-like domain protein		EMQU_0528	560686	560943	-	38.7597	71.6095	2.00627	51.7768	0.0280168	0.723044
	hypothetical protein		EMQU_0529	561116	561736	-	35.4267	14.0925	0	0	0	0
	transcriptional regulator	InterPro: IPR007737: M trans-acting positive regulator; IPR011991: Winged helix-turn-helix transcription repressor DNA-binding; IPR013196: Helix-turn-helix, type 11	EMQU_0530	562820	564295	+	32.4526	125.5	58.5651	56.3137	0.466653	0.448713
	hypothetical protein	InterPro: IPR005046: Protein of unknown function DUF285, lipoprotein predicted; IPR011889: Bacterial surface protein 26-residue repeat	EMQU_0531	564561	567566	+	40.2196	131.656	17.7361	106.325	0.134715	0.807593
	hypothetical protein		EMQU_0532	567599	568117	+	40.0771	207.029	74.8002	64.8235	0.361303	0.313113
	predicted protein		EMQU_0533	568143	568700	+	42.6523	163.806	22.2631	69.1594	0.135911	0.422203
	hypothetical protein		EMQU_0534	568741	569106	+	41.2568	62.4343	0	50.0163	0	0.801103
	hypothetical protein		EMQU_0535	569308	570462	+	39.4805	115.76	77.9787	39.8375	0.673626	0.34414
	hypothetical protein		EMQU_0536	570607	571770	+	39.1753	91.0563	33.7963	21.6774	0.371159	0.238066
	transcriptional regulator	InterPro: IPR007737: M trans-acting positive regulator; IPR011608: PRD	EMQU_0537	571988	573505	-	34.4532	97.0459	6.47874	74.6371	0.0667595	0.76909
	hypothetical protein		EMQU_0538	573771	574142	+	38.7097	31.3671	150.276	1.32999	4.79088	0.0424007
	wxL domain cell surface protein		EMQU_0539	574165	574968	+	40.9204	165.692	39.272	36.3067	0.237018	0.219122
	cell wall surface anchor family protein	InterPro: IPR010317: Protein of unknown function DUF916, cell surface putative; IPR021759: Domain of unknown function DUF3324, C-terminal	EMQU_0540	575044	576129	+	39.5028	151.767	45.7562	66.9697	0.301491	0.441268
	wxL domain surface protein		EMQU_0541	576143	581014	+	42.4466	126.138	52.6967	41.4328	0.41777	0.328471
	transcriptional regulator	InterPro: IPR007737: M trans-acting positive regulator	EMQU_0542	581256	582743	-	32.9301	54.8925	1.04358	4.98746	0.0190114	0.0908587
	predicted protein		EMQU_0543	583781	584164	+	31.5104	34.1853	78.1818	1.28843	2.287	0.0376895
	hypothetical protein		EMQU_0544	584254	584466	-	34.2723	29.6736	138.517	0	4.66803	0
	pentapeptide repeat-containing protein		EMQU_0545	584700	585326	+	36.6826	162.063	38.8007	33.9306	0.239416	0.209366
	hypothetical protein	InterPro: IPR007351: Protein of unknown function DUF419	EMQU_0546	585457	585810	+	37.2881	196.399	39.4793	81.0617	0.201016	0.41274
	transposase like protein	InterPro: IPR002686: Transposase IS200-like	EMQU_0547	585939	586103	+	39.3939	114.918	47.0561	71.9645	0.409477	0.626226
	transposase	KO: K07496; InterPro: IPR001959: Transposase, probable, IS891/IS1136/IS1341; IPR010095: Transposase IS605, OrfB, C-terminal; IPR021027: Transposase, putative, helix-turn-helix domain	EMQU_0548	586320	587471	+	35.4167	58.6636	54.8171	97.0615	0.934431	1.65454
	hypothetical protein		EMQU_0549	587857	588087	+	35.4978	166.273	114.279	79.2466	0.687299	0.476606
	ATP-binding cassette transporter-like protein	InterPro: IPR011053: Single hybrid motif	EMQU_0550	588149	589402	+	37.799	437.339	189.05	411.113	0.432274	0.940033
	ABC transporter family protein	KO: K09810: lipoprotein-releasing system ATP-binding protein [EC:3.6.3.-]; InterPro: IPR003439: ABC transporter-like; IPR003593: ATPase, AAA+ type, core; IPR017871: ABC transporter, conserved site	EMQU_0551	589389	590072	+	42.2515	1007.92	332.213	837.613	0.329603	0.83103
	permease family protein	KO: K02004; InterPro: IPR003838: Permease FtsX-like	EMQU_0552	590079	591311	+	37.6318	455.434	232.571	535.685	0.510658	1.17621
	DNA-binding response regulator VanRB	InterPro: IPR001789: Signal transduction response regulator, receiver domain; IPR001867: Signal transduction response regulator, C-terminal; IPR011006: CheY-like superfamily; IPR011991: Winged helix-turn-helix transcription repressor DNA-binding	EMQU_0553	591324	591980	+	36.0731	495.071	442.772	819.322	0.89436	1.65496
	sensor histidine kinase VanSB	InterPro: IPR003594: ATPase-like, ATP-binding domain; IPR003660: HAMP linker domain; IPR003661: Signal transduction histidine kinase, subgroup 1, dimerisation/phosphoacceptor domain; IPR005467: Signal transduction histidine kinase, core; IPR009082: Signal transduction histidine kinase, homodimeric	EMQU_0554	591977	593341	+	33.9194	404.624	161.542	298.666	0.39924	0.738131
	hypothetical protein		EMQU_0555	593345	593557	+	35.6808	600.32	177.399	58.0699	0.295508	0.0967317
proY	APC family amino acid transporter, proline permease	KO: K03293; InterPro: IPR002293: Amino acid/polyamine transporter I; IPR004840: Amino acid permease, conserved site; IPR004841: Amino acid permease domain	EMQU_0556	593679	595049	-	40.4085	118.799	54.3668	87.3311	0.457636	0.735115
	ABC superfamily ATP binding cassette transporter, ABC protein	KO: K09820; InterPro: IPR003439: ABC transporter-like; IPR003593: ATPase, AAA+ type, core; IPR017871: ABC transporter, conserved site	EMQU_0557	595291	596037	+	37.8849	690.56	200.949	141.737	0.290995	0.20525
	ABC transporter permease	KO: K09819; InterPro: IPR001626: ABC-3	EMQU_0558	596034	596891	+	38.5781	927.615	307.675	382.311	0.331684	0.412144
psaA	manganese ABC superfamily ATP binding cassette transporter, binding protein	KO: K09818; InterPro: IPR006127: ABC transporter, metal-binding lipoprotein; IPR006128: Adhesion lipoprotein; IPR006129: Adhesin B	EMQU_0559	596923	597858	+	39.4231	1217.55	412.545	366.31	0.338831	0.300857
	hypothetical protein		EMQU_0560	598132	598878	+	36.5462	213.481	130.963	152.334	0.613466	0.713573
	4Fe-4S binding protein	InterPro: IPR004155: PBS lyase HEAT-like repeat; IPR004453: 4Fe-4S cluster binding; IPR009051: Alpha-helical ferredoxin; IPR011989: Armadillo-like helical; IPR012285: Fumarate reductase, C-terminal; IPR013542: Domain of unknown function DUF1730; IPR016024: Armadillo-type fold; IPR017896: 4Fe-4S ferredoxin, iron-sulpur binding domain; IPR017900: 4Fe-4S ferredoxin, iron-sulphur binding, conserved s…	EMQU_0561	598894	600060	+	42.5021	264.968	253.708	125.915	0.957506	0.475208
	aggregation promoting factor	InterPro: IPR002482: Peptidoglycan-binding Lysin subgroup; IPR018392: Peptidoglycan-binding lysin domain	EMQU_0562	600438	601046	+	40.7225	39.1188	31.448	31.6839	0.803911	0.80994
	dadA family oxidoreductase	InterPro: IPR006076: FAD dependent oxidoreductase	EMQU_0563	601111	602217	-	44.6251	68.9538	30.8607	75.5318	0.447555	1.0954
	major facilitator superfamily transporter	InterPro: IPR001411: Tetracycline resistance protein TetB/drug resistance transporter; IPR011701: Major facilitator superfamily; IPR016196: Major facilitator superfamily domain, general substrate transporter; IPR020846: Major facilitator superfamily domain	EMQU_0564	602396	603778	-	39.5517	47.8105	8.60824	62.9624	0.180049	1.31692
	hypothetical protein	InterPro: IPR008319: Uncharacterised conserved protein UCP031644; IPR010499: Bacterial transcription activator, effector binding; IPR011256: Regulatory factor, effector, bacterial; IPR019233: Domain of unknown function DUF2174, N-terminal	EMQU_0565	603988	604638	+	40.8602	191.19	131.193	386.837	0.686193	2.02331
	arginine repressor	KO: K03402; InterPro: IPR001669: Arginine repressor; IPR011991: Winged helix-turn-helix transcription repressor DNA-binding; IPR020899: Arginine repressor, C-terminal; IPR020900: Arginine repressor, DNA-binding domain; IPR024946: Arginine repressor C-terminal-like domain	EMQU_0566	604696	605151	+	40.1316	214.308	202.052	108.499	0.942815	0.506277
	hypothetical protein		EMQU_0567	605342	605548	+	29.9517	157.366	90.0204	78.8741	0.572045	0.501214
	mn-containing catalase	KO: K07217; InterPro: IPR007760: Catalase, manganese; IPR009078: Ferritin/ribonucleotide reductase-like; IPR012347: Ferritin-related	EMQU_0568	605599	606429	-	40.6739	387.314	574.3	246.485	1.48278	0.636395
	DNA-binding response regulator	InterPro: IPR001789: Signal transduction response regulator, receiver domain; IPR001867: Signal transduction response regulator, C-terminal; IPR011006: CheY-like superfamily; IPR011991: Winged helix-turn-helix transcription repressor DNA-binding; IPR016032: Signal transduction response regulator, C-terminal effector	EMQU_0569	607053	607727	+	38.5185	193.756	151.834	332.036	0.783638	1.71368
	sensor histidine kinase	KO: K00936; InterPro: IPR003594: ATPase-like, ATP-binding domain; IPR004358: Signal transduction histidine kinase-related protein, C-terminal; IPR005467: Signal transduction histidine kinase, core	EMQU_0570	607745	608770	+	37.6218	301.381	219.458	251.718	0.728173	0.835214
	glucose uptake protein	KO: K05340; InterPro: IPR010651: Sugar transport	EMQU_0571	609102	609968	+	38.5236	158.699	25.0749	46.7935	0.158003	0.294857
	APC family amino acid transporter	KO: K03294; InterPro: IPR002293: Amino acid/polyamine transporter I; IPR004841: Amino acid permease domain	EMQU_0572	610012	611391	+	41.8116	189.896	77.2675	135.879	0.406894	0.715542
	tellurite resistance protein	InterPro: IPR008863: Toxic anion resistance	EMQU_0573	611456	612655	-	38.5833	709.433	1306.12	873.656	1.84108	1.23149
	hypothetical protein	InterPro: IPR018770: 5-bromo-4-chloroindolyl phosphate hydrolysis protein	EMQU_0574	612745	613401	-	36.3775	444.01	806.758	417.191	1.81698	0.9396
	mutT/nudix family protein	KO: K01515: ADP-ribose pyrophosphatase [EC:3.6.1.13]; InterPro: IPR000086: NUDIX hydrolase domain; IPR015797: NUDIX hydrolase domain-like	EMQU_0575	613618	614181	+	40.2482	284.473	175.292	385.98	0.6162	1.35682
	hypothetical protein		EMQU_0576	614194	614478	+	36.8421	315.597	69.0156	243.038	0.218683	0.770089
mtnN	bifunctional methylthioadenosine nucleosidase/adenosylhomocysteine nucleosidase	KO: K01243: S-adenosylhomocysteine/5'-methylthioadenosine nucleosidase [EC:3.2.2.9]; InterPro: IPR000845: Nucleoside phosphorylase domain; IPR010049: MTA/SAH nucleosidase; IPR018017: Nucleoside phosphorylase	EMQU_0577	614496	615188	+	42.5685	359.907	153.119	269.153	0.425441	0.74784
	isochorismatase family protein	InterPro: IPR000868: Isochorismatase-like	EMQU_0578	615201	615752	+	40.5797	348.789	255.996	264.408	0.733956	0.758073
	hypothetical protein		EMQU_0579	615903	616085	+	31.1475	61.1059	16.9711	0	0.277732	0
	hypothetical protein		EMQU_0580	616783	616998	+	31.4815	38.265	23.9638	0	0.626258	0
	endopeptidase PepO	KO: K07386; InterPro: IPR000718: Peptidase M13, neprilysin; IPR008753: Peptidase M13; IPR018497: Peptidase M13, neprilysin, C-terminal; IPR024079: Metallopeptidase, catalytic domain	EMQU_0581	618284	620191	-	41.0377	274.438	306.013	169.327	1.11505	0.616995
	hypothetical protein		EMQU_0582	620429	621283	+	42.4561	429.895	857.852	361.664	1.99549	0.841284
	ribose-phosphate pyrophosphokinase	KO: K00948: ribose-phosphate pyrophosphokinase [EC:2.7.6.1]; InterPro: IPR000836: Phosphoribosyltransferase; IPR000842: Phosphoribosyl pyrophosphate synthetase, conserved site; IPR005946: Ribose-phosphate diphosphokinase	EMQU_0583	621361	622341	+	42.2018	447.533	409.451	157.354	0.914906	0.351602
iscS	cysteine desulfurase/selenocysteine lyase	KO: K04487: cysteine desulfurase [EC:2.8.1.7]; InterPro: IPR000192: Aminotransferase, class V/Cysteine desulfurase; IPR015421: Pyridoxal phosphate-dependent transferase, major region, subdomain 1; IPR015422: Pyridoxal phosphate-dependent transferase, major region, subdomain 2; IPR015424: Pyridoxal phosphate-dependent transferase, major domain; IPR016454: Cysteine desulfurase, NifS; IPR020578: Ami…	EMQU_0584	622508	623638	+	39.611	113.487	37.5284	54.6812	0.330683	0.481826
	hypothetical protein	InterPro: IPR014965: Protein of unknown function DUF1831	EMQU_0585	623714	624061	+	39.3678	97.7969	184.438	86.7244	1.88593	0.886781
	hypothetical protein		EMQU_0586	624204	624983	-	39.2308	193.23	66.3612	45.6698	0.343432	0.23635
	transporter, major facilitator family protein	KO: K08217; InterPro: IPR011701: Major facilitator superfamily; IPR016196: Major facilitator superfamily domain, general substrate transporter; IPR020846: Major facilitator superfamily domain	EMQU_0587	625114	626346	+	40.3082	83.9891	26.8674	84.265	0.319892	1.00328
	phosphoesterase or phosphohydrolase		EMQU_0588	626439	627047	+	39.9015	144.5	192.088	31.6839	1.32933	0.219266
	hypothetical protein		EMQU_0589	627204	627890	+	36.5357	81.3856	18.8361	20.1647	0.231443	0.247768
	hypothetical protein		EMQU_0590	628195	630108	-	37.5653	61.7264	37.8612	4.13589	0.613372	0.0670036
	hypothetical protein		EMQU_0591	630760	631026	+	30.7116	45.5235	1.93864	0	0.0425856	0
	hypothetical protein		EMQU_0592	631363	631632	+	32.5926	46.8183	26.8394	12.827	0.573267	0.273974
	hypothetical protein		EMQU_0593	631657	631914	+	26.3566	154.526	10.0313	59.4474	0.064917	0.384709
	hypothetical protein		EMQU_0594	632307	632594	+	33.6806	143.494	5.39185	1.7179	0.0375755	0.011972
	hypothetical protein		EMQU_0595	632984	633247	+	28.0303	20.2579	0	185.533	0	9.15856
	hypothetical protein		EMQU_0596	633281	633496	+	30.0926	2.25088	0	0	0	0
	hypothetical protein		EMQU_0597	633621	633884	+	35.6061	5.52489	1.96067	0	0.35488	0
	hypothetical protein		EMQU_0598	634206	634829	+	33.1731	148.818	12.4427	73.7376	0.0836104	0.495489
trmU	tRNA (5-methyl aminomethyl-2-thiouridylate)-methyltransferase	KO: K00566: tRNA-specific 2-thiouridylase [EC:2.8.1.-]; InterPro: IPR004506: tRNA-specific 2-thiouridylase; IPR014729: Rossmann-like alpha/beta/alpha sandwich fold; IPR023382: Adenine nucleotide alpha hydrolase-like domains	EMQU_0599	635029	636150	+	43.4938	332.36	162.39	197.55	0.488596	0.594384
	MFS family major facilitator transporter	KO: K08161; InterPro: IPR001958: Tetracycline resistance protein, TetA/multidrug resistance protein MdtG; IPR005828: General substrate transporter; IPR011701: Major facilitator superfamily; IPR016196: Major facilitator superfamily domain, general substrate transporter; IPR020846: Major facilitator superfamily domain	EMQU_0600	636181	637443	-	43.6263	287.942	221.309	256.975	0.76859	0.892456
	tetR/AcrR family transcriptional regulator	InterPro: IPR001647: DNA-binding HTH domain, TetR-type; IPR009057: Homeodomain-like; IPR011075: Tetracycline transcriptional regulator, TetR-related, C-terminal; IPR015893: Tetracycline transcriptional regulator, TetR-like, C-terminal	EMQU_0601	637591	638157	+	38.8007	232.377	240.094	205.058	1.03321	0.882436
	hypothetical protein	InterPro: IPR010434: Protein of unknown function DUF1033	EMQU_0602	638282	638659	+	38.8889	466.897	360.141	129.579	0.77135	0.277532
	DNA topoisomerase III	KO: K03169; InterPro: IPR000380: DNA topoisomerase, type IA; IPR003601: DNA topoisomerase, type IA, domain 2; IPR003602: DNA topoisomerase, type IA, DNA-binding; IPR005738: DNA topoisomerase III, bacterial-type; IPR006171: Toprim domain; IPR013497: DNA topoisomerase, type IA, central; IPR013824: DNA topoisomerase, type IA, central region, subdomain 1; IPR013826: DNA topoisomerase, type IA, centra…	EMQU_0603	638694	640667	+	42.0466	408.853	476.449	287.73	1.16533	0.70375
	ybaK/prolyl-tRNA synthetase associated domain-containing protein	InterPro: IPR007214: YbaK/aminoacyl-tRNA synthetase-associated domain	EMQU_0604	640669	641154	-	39.5062	431.169	450.519	430.621	1.04488	0.998729
	amino acid ABC transporter permease	KO: K02029; InterPro: IPR000515: Binding-protein-dependent transport systems inner membrane component; IPR003444: MraZ; IPR010065: Amino acid ABC transporter, permease protein, 3-TM domain, His/Glu/Gln/Arg/opine family	EMQU_0605	641569	642210	+	40.4984	115.868	20.1564	36.9911	0.173961	0.319252
	amino acid ABC transporter ATP-binding protein	KO: K02028; InterPro: IPR003439: ABC transporter-like; IPR003593: ATPase, AAA+ type, core; IPR017871: ABC transporter, conserved site	EMQU_0606	642231	642866	+	39.4654	188.055	31.7407	171.142	0.168784	0.910064
aatB	amino acid ABC superfamily ATP binding cassettetransporter, binding protein	KO: K02030; InterPro: IPR001320: Ionotropic glutamate receptor; IPR001638: Extracellular solute-binding protein, family 3	EMQU_0607	642885	643697	+	36.7774	180.602	9.55014	97.9775	0.0528794	0.542505
	glycoside hydrolase	KO: K01223: 6-phospho-beta-glucosidase [EC:3.2.1.86]; InterPro: IPR001360: Glycoside hydrolase, family 1; IPR013781: Glycoside hydrolase, subgroup, catalytic domain; IPR017853: Glycoside hydrolase, superfamily; IPR018120: Glycoside hydrolase, family 1, active site	EMQU_0608	643903	645348	+	41.2863	288.15	317.873	366.79	1.10315	1.27291
	hypothetical protein	InterPro: IPR008997: Ricin B-related lectin	EMQU_0609	645485	647026	-	37.5486	85.7612	31.8895	98.8228	0.371841	1.1523
	cell division protein FtsK	KO: K03466; InterPro: IPR002543: Cell division protein FtsK/SpoIIIE; IPR003593: ATPase, AAA+ type, core; IPR018541: DNA translocase FtsK gamma	EMQU_0610	647452	649884	+	42.2935	298.149	210.621	166.139	0.706429	0.557234
	hypothetical protein LEUM_1902		EMQU_0611	650070	650774	+	39.5745	120.686	2.20263	67.371	0.018251	0.558236
	hypothetical protein		EMQU_0612	650790	650921	+	34.8485	44.1991	11.764	3.74815	0.26616	0.0848014
	hypothetical protein		EMQU_0613	650961	651203	+	35.3909	18.0071	10.6506	4.07206	0.591466	0.226137
rlmN	fe-S-cluster redox protein	KO: K06941; InterPro: IPR004383: Ribosomal RNA large subunit methyltransferase RlmN;; IPR006638: Elongator protein 3/MiaB/NifB; IPR007197: Radical SAM	EMQU_0614	651324	652397	+	38.3613	143.503	106.512	71.864	0.742225	0.500783
	aminoglycoside N(6')-acetyltransferase	InterPro: IPR000182: GCN5-related N-acetyltransferase (GNAT) domain; IPR016181: Acyl-CoA N-acyltransferase	EMQU_0615	652483	653025	+	41.6206	235.485	243.08	107.516	1.03225	0.456574
	peptide ABC transporter peptide-binding protein	KO: K15580: oligopeptide transport system substrate-binding protein; InterPro: IPR000914: Bacterial extracellular solute-binding protein, family 5	EMQU_0616	653358	655025	+	40.2278	110.471	38.1696	58.1368	0.345516	0.526261
	hypothetical protein		EMQU_0617	655118	655462	-	38.8406	157.836	87.0197	1.43407	0.551331	0.00908587
dppB	oligopeptide ABC superfamily ATP binding cassette transporter, membrane protein	KO: K15581: oligopeptide transport system permease protein; InterPro: IPR000515: Binding-protein-dependent transport systems inner membrane component	EMQU_0618	655543	656484	+	39.4904	88.2575	107.15	40.967	1.21406	0.464176
	peptide ABC transporter permease	KO: K15582: oligopeptide transport system permease protein; InterPro: IPR000515: Binding-protein-dependent transport systems inner membrane component	EMQU_0619	656485	657528	+	42.2414	115.028	70.8997	89.094	0.61637	0.774543
	peptide ABC transporter ATP-binding protein	KO: K15583: oligopeptide transport system ATP-binding protein; InterPro: IPR003439: ABC transporter-like; IPR003593: ATPase, AAA+ type, core; IPR010066: Oligopeptide/dipeptide ABC transporter, ATP-binding protein, C-terminal; IPR013563: Oligopeptide/dipeptide ABC transporter, C-terminal; IPR017871: ABC transporter, conserved site	EMQU_0620	657534	658616	+	41.9206	89.7859	103.715	79.9467	1.15513	0.890415
dppF	oligopeptide ABC superfamily ATP binding cassette transporter, ABC protein	KO: K10823: oligopeptide transport system ATP-binding protein; InterPro: IPR003439: ABC transporter-like; IPR003593: ATPase, AAA+ type, core; IPR013563: Oligopeptide/dipeptide ABC transporter, C-terminal; IPR017871: ABC transporter, conserved site	EMQU_0621	658591	659544	+	41.4046	66.762	28.7565	100.092	0.430732	1.49924
	transposase-like protein B	InterPro: IPR001959: Transposase, probable, IS891/IS1136/IS1341; IPR021027: Transposase, putative, helix-turn-helix domain	EMQU_0622	659557	660564	+	36.7063	99.3604	21.5674	183.57	0.217062	1.84752
	IS204/IS1001/IS1096/IS1165 family transposase		EMQU_0623	660872	661372	-	36.1277	12.6157	1.03317	29.6261	0.0818953	2.34835
	hypothetical protein ETA_16930		EMQU_0624	661583	668338	+	38.5139	101.038	71.3295	57.3407	0.705968	0.567517
	IS1469-like transposase	KO: K07491; InterPro: IPR002686: Transposase IS200-like	EMQU_0625	668887	669339	+	32.0088	75.1288	116.55	2.18435	1.55133	0.0290748
	mutT/Nudix family hydrolase	InterPro: IPR000086: NUDIX hydrolase domain; IPR015797: NUDIX hydrolase domain-like	EMQU_0626	669464	670285	-	41.3625	146.685	105.161	78.2461	0.716914	0.533428
	methionyl-tRNA synthetase	KO: K01874: methionyl-tRNA synthetase [EC:6.1.1.10]; InterPro: IPR001412: Aminoacyl-tRNA synthetase, class I, conserved site; IPR002547: tRNA-binding domain; IPR004495: Methionyl-tRNA synthetase, class Ia, beta subunit, C-terminal; IPR009080: Aminoacyl-tRNA synthetase, class 1a, anticodon-binding; IPR012340: Nucleic acid-binding, OB-fold; IPR013155: Valyl/Leucyl/Isoleucyl-tRNA synthetase, class I…	EMQU_0627	670933	672942	+	40.5473	686.23	361.302	528.232	0.526503	0.769759
	hypothetical protein OBV_42930	InterPro: IPR003812: Filamentation induced by cAMP/death on curing-related	EMQU_0628	673283	674044	+	36.6142	86.7742	38.0401	66.2272	0.438381	0.763213
	hypothetical protein		EMQU_0629	674086	674679	-	41.0774	112.953	0.87141	36.6486	0.00771478	0.324458
	amino acid permease family protein	KO: K03294; InterPro: IPR002293: Amino acid/polyamine transporter I; IPR004841: Amino acid permease domain	EMQU_0630	674848	676170	+	41.2698	155.449	46.9494	50.4853	0.302025	0.324771
	tatD family deoxyribonuclease	KO: K03424; InterPro: IPR001130: TatD superfamily; IPR012278: Deoxyribonuclease TatD; IPR015991: Deoxyribonuclease TatD, bacterial-type; IPR018228: Deoxyribonuclease, TatD-related, conserved site	EMQU_0631	676307	677083	+	40.9266	195.853	202.517	58.5811	1.03403	0.299108
	primase-like protein	KO: K05985; InterPro: IPR004466: Primase-related protein; IPR006171: Toprim domain	EMQU_0632	677076	677645	+	42.1053	332.657	78.0967	169.259	0.234767	0.508809
ksgA	dimethyladenosine transferase	KO: K02528; InterPro: IPR001737: Ribosomal RNA adenine methylase transferase; IPR011530: Ribosomal RNA adenine dimethylase; IPR020596: Ribosomal RNA adenine methylase transferase, conserved site; IPR020598: Ribosomal RNA adenine methylase transferase, N-terminal; IPR023165: rRNA adenine dimethylase-like	EMQU_0633	677638	678522	+	40.226	325.226	376.077	107.896	1.15636	0.331757
	hypothetical protein		EMQU_0634	678774	679400	+	41.3078	95.3771	70.1714	48.1341	0.735726	0.504672
	sugar ABC transporter ATP-binding protein	KO: K10112: maltose/maltodextrin transport system ATP-binding protein; InterPro: IPR003439: ABC transporter-like; IPR003593: ATPase, AAA+ type, core; IPR008995: Molybdate/tungstate binding; IPR013611: Transport-associated OB, type 2; IPR017871: ABC transporter, conserved site	EMQU_0635	679494	680603	-	41.3514	874.705	60.1555	989.957	0.0687724	1.13176
	hypothetical protein		EMQU_0636	681017	681250	+	35.4701	132.975	33.1806	105.717	0.249525	0.795013
chpA_2	chpA/MazF transcriptional modulator	KO: K07171; InterPro: IPR003477: PemK-like protein; IPR011067: Plasmid maintenance toxin/Cell growth inhibitor	EMQU_0637	681251	681577	+	32.7217	62.4465	34.8244	60.5206	0.557668	0.969159
mgsA	methylglyoxal synthase	KO: K01734: methylglyoxal synthase [EC:4.2.3.3]; InterPro: IPR004363: Methylglyoxal synthase; IPR011607: Methylglyoxal synthase-like domain; IPR018148: Methylglyoxal synthase, active site	EMQU_0638	681641	682072	+	41.8981	202.579	128.206	195.841	0.632869	0.966736
	integral membrane protein	InterPro: IPR024529: ECF transporter, substrate-specific component	EMQU_0639	682361	682894	+	41.1985	1062.52	410.023	668.94	0.385897	0.62958
	ABC transporter ATP-binding protein/permease	KO: K06147; InterPro: IPR001140: ABC transporter, transmembrane domain; IPR003439: ABC transporter-like; IPR003593: ATPase, AAA+ type, core; IPR011527: ABC transporter, transmembrane domain, type 1; IPR017940: ABC transporter, integral membrane type 1	EMQU_0640	682972	684747	-	40.9347	252.95	293.491	183.583	1.16027	0.725768
	ABC transporter ATP-binding protein/permease	KO: K06147; InterPro: IPR001140: ABC transporter, transmembrane domain; IPR003439: ABC transporter-like; IPR003593: ATPase, AAA+ type, core; IPR011527: ABC transporter, transmembrane domain, type 1; IPR017871: ABC transporter, conserved site; IPR017940: ABC transporter, integral membrane type 1	EMQU_0641	684749	686464	-	40.9674	247.628	280.829	282.841	1.13407	1.1422
	chitin binding protein	KO: K03933; InterPro: IPR004302: Chitin-binding, domain 3; IPR014756: Immunoglobulin E-set	EMQU_0642	686871	687512	-	40.9657	57.5553	1.61252	33.9085	0.0280168	0.589147
	hypothetical protein		EMQU_0643	687589	687774	+	34.9462	156.836	8.34867	0	0.053232	0
	transcriptional regulator		EMQU_0644	688125	688616	-	34.7561	56.3269	6.31241	0	0.112067	0
	transcriptional regulator	InterPro: IPR001387: Helix-turn-helix type 3; IPR010982: Lambda repressor-like, DNA-binding	EMQU_0645	688613	689065	-	31.5673	69.7624	0	26.2122	0	0.375736
	chitinase	KO: K01183: chitinase [EC:3.2.1.14]; InterPro: IPR001223: Glycoside hydrolase, family 18, catalytic domain; IPR001579: Glycoside hydrolase, chitinase active site; IPR003610: Carbohydrate-binding module family 5/12; IPR003961: Fibronectin, type III; IPR011583: Chitinase II; IPR013781: Glycoside hydrolase, subgroup, catalytic domain; IPR013783: Immunoglobulin-like fold; IPR017853: Glycoside hydrola…	EMQU_0646	689278	691014	+	38.8025	58.7795	61.387	46.143	1.04436	0.785019
gpsA	glycerol-3-phosphate dehydrogenase	KO: K00057: glycerol-3-phosphate dehydrogenase (NAD(P)+) [EC:1.1.1.94]; InterPro: IPR006109: Glycerol-3-phosphate dehydrogenase, NAD-dependent, C-terminal; IPR006168: Glycerol-3-phosphate dehydrogenase, NAD-dependent; IPR008927: 6-phosphogluconate dehydrogenase, C-terminal-like; IPR011128: Glycerol-3-phosphate dehydrogenase, NAD-dependent, N-terminal; IPR013328: Dehydrogenase, multihelical; IPR01…	EMQU_0647	691781	692794	+	42.6036	391.733	386.937	254.209	0.987756	0.648933
galU	UTP-glucose-1-phosphate uridylyltransferase	KO: K00963: UTP--glucose-1-phosphate uridylyltransferase [EC:2.7.7.9]; InterPro: IPR005771: UTP--glucose-1-phosphate uridylyltransferase, bacterial/archaeal-type; IPR005835: Nucleotidyl transferase	EMQU_0648	692804	693706	+	37.6523	369.892	664.935	374.217	1.79764	1.01169
	hypothetical protein		EMQU_0649	693770	694144	+	38.6667	392.842	605.957	163.599	1.5425	0.416451
	sugar isomerase	InterPro: IPR001347: Sugar isomerase (SIS)	EMQU_0650	694654	695259	+	40.099	48.1377	28.1871	33.4736	0.585551	0.695372
	hypothetical protein	InterPro: IPR018385: C4-dicarboxylate anaerobic carrier-like	EMQU_0651	695829	697520	+	42.5532	221.544	171.315	134.508	0.773279	0.607139
	beta-aspartyl peptidase	KO: K01305; InterPro: IPR006680: Amidohydrolase 1; IPR010229: Peptidase M38, beta-aspartyl dipeptidase; IPR011059: Metal-dependent hydrolase, composite domain	EMQU_0652	697724	698914	+	43.3249	232.277	72.5794	73.5279	0.312469	0.316552
	hypothetical protein	InterPro: IPR008462: CsbD-like	EMQU_0653	699005	699226	+	37.3874	1410.39	1580.83	782.249	1.12085	0.554633
	ABC superfamily ATP binding cassette transporter, ABC protein	KO: K02003; InterPro: IPR003439: ABC transporter-like; IPR003593: ATPase, AAA+ type, core; IPR017871: ABC transporter, conserved site	EMQU_0654	699289	699954	-	39.6396	78.8417	18.6529	46.8012	0.236586	0.59361
	ABC superfamily ATP binding cassette transporter, membrane protein	KO: K02004; InterPro: IPR003838: Permease FtsX-like	EMQU_0655	699967	701475	-	42.611	69.5939	37.3892	33.7706	0.537248	0.485253
	metallo-beta-lactamase superfamily hydrolase	InterPro: IPR001279: Beta-lactamase-like; IPR011108: RNA-metabolising metallo-beta-lactamase	EMQU_0656	701949	703628	+	41.131	473.168	498.515	333.666	1.05357	0.705175
	hypothetical protein CLORAM_03138	InterPro: IPR003501: Phosphotransferase system, EIIB component, type 2/3; IPR013012: Phosphotransferase system, EIIB component, type 3	EMQU_0657	703741	704091	+	32.7635	18.0071	48.6649	42.2868	2.70255	2.34835
	metal-dependent hydrolase	InterPro: IPR001279: Beta-lactamase-like; IPR022877: Uncharacterised protein family UPF0173, metal-dependent hydrolase	EMQU_0658	704521	705201	+	42.7313	426.934	310.114	197.612	0.726376	0.462863
	hypothetical protein	InterPro: IPR000524: Transcription regulator HTH, GntR; IPR000644: Cystathionine beta-synthase, core; IPR006683: Thioesterase superfamily; IPR010766: DRTGG; IPR011991: Winged helix-turn-helix transcription repressor DNA-binding	EMQU_0659	705211	706542	+	42.7177	413.189	529.664	348.409	1.28189	0.84322
	DHH family protein	KO: K06881; InterPro: IPR001667: Phosphoesterase, RecJ-like; IPR003156: Phosphoesterase, DHHA1	EMQU_0660	706558	707508	+	41.5352	504.595	438.151	318.912	0.868323	0.632016
phnA	alkylphosphonate uptake protein	KO: K06193: phosphonoacetate hydrolase [EC:3.11.1.2]; InterPro: IPR004624: PhnA protein; IPR013987: PhnA protein, N-terminal; IPR013988: PhnA protein, C-terminal	EMQU_0661	707808	708140	+	39.3393	258.426	326.425	190.176	1.26313	0.735904
	zn-dependent protease	KO: K06973; InterPro: IPR007395: Peptidase, membrane zinc metallopeptidase, putative	EMQU_0662	708218	708922	+	41.5603	498.604	594.709	425.279	1.19275	0.852941
	transcriptional regulator	InterPro: IPR007737: M trans-acting positive regulator; IPR011991: Winged helix-turn-helix transcription repressor DNA-binding	EMQU_0663	709048	710523	-	31.6396	16.1405	0.350689	8.38001	0.0217273	0.519192
	hypothetical protein		EMQU_0664	710992	711537	+	33.3333	13.3569	3.79207	0	0.283904	0
	hypothetical protein		EMQU_0665	711805	712140	+	36.3095	1332.68	1645.28	1042.52	1.23457	0.782273
	fis family DNA-binding protein	InterPro: IPR002197: Helix-turn-helix, Fis-type; IPR009057: Homeodomain-like	EMQU_0666	712211	713062	-	34.6244	82.173	21.2636	105.687	0.258766	1.28616
	tRNA specific adenosine deaminase	InterPro: IPR002125: CMP/dCMP deaminase, zinc-binding; IPR016192: APOBEC/CMP deaminase, zinc-binding; IPR016193: Cytidine deaminase-like	EMQU_0667	713194	713688	+	42.4242	159.117	65.8786	103.949	0.414026	0.653285
yunD	phosphoesterase-related protein YunD	InterPro: IPR004843: Metallophosphoesterase domain; IPR006146: 5'-Nucleotidase, conserved site; IPR006179: 5'-Nucleotidase/apyrase; IPR008334: 5'-Nucleotidase, C-terminal; IPR011240: Phosphoesterase-related protein YunD	EMQU_0668	713941	715377	+	39.1788	394.839	530.945	288.866	1.34471	0.731603
	hypothetical protein	InterPro: IPR009370: Protein of unknown function DUF1027	EMQU_0669	715389	716072	+	39.3275	896.325	818.804	634.358	0.913513	0.707732
	HAD superfamily hydrolase	KO: K01101: 4-nitrophenyl phosphatase [EC:3.1.3.41]; InterPro: IPR005834: Haloacid dehalogenase-like hydrolase; IPR006354: HAD-superfamily hydrolase, subfamily IIA, hypothetical 1; IPR006357: HAD-superfamily hydrolase, subfamily IIA; IPR023214: HAD-like domain; IPR023215: Nitrophenylphosphatase-like domain	EMQU_0670	716077	716841	+	41.3072	827.477	1028.47	787.729	1.2429	0.951965
	integral membrane protein 1906	InterPro: IPR010178: Integral membrane protein 1906	EMQU_0671	716846	717493	+	37.6543	786.308	923.404	706.249	1.17435	0.898183
	low temperature requirement C protein	InterPro: IPR007686: Phosphatidylglycerophosphatase A	EMQU_0672	717600	718109	-	39.0196	160.157	61.9111	96.0408	0.386565	0.599667
	pyridine nucleotide-disulfide family oxidoreductase	KO: K00384: thioredoxin reductase (NADPH) [EC:1.8.1.9]; InterPro: IPR000103: Pyridine nucleotide-disulphide oxidoreductase, class-II; IPR013027: FAD-dependent pyridine nucleotide-disulphide oxidoreductase; IPR022890: Ferredoxin--NADP reductase, type 2; IPR023753: Pyridine nucleotide-disulphide oxidoreductase, FAD/NAD(P)-binding domain	EMQU_0673	718202	719200	-	39.1391	83.7085	40.9327	61.4111	0.488991	0.733631
	citrate transporter	InterPro: IPR004680: Divalent ion symporter	EMQU_0674	719390	720502	+	35.5795	70.3294	72.5501	45.786	1.03158	0.651022
ppi	peptidyl-prolyl isomerase	KO: K03768; InterPro: IPR002130: Cyclophilin-like peptidyl-prolyl cis-trans isomerase domain; IPR020892: Cyclophilin-type peptidyl-prolyl cis-trans isomerase, conserved site	EMQU_0675	720553	721137	+	41.3675	752.972	353.926	704.498	0.470039	0.935624
	class II aminotransferase	KO: K14155: cystathione beta-lyase [EC:4.4.1.8]; InterPro: IPR001176: 1-aminocyclopropane-1-carboxylate synthase; IPR004839: Aminotransferase, class I/classII; IPR015421: Pyridoxal phosphate-dependent transferase, major region, subdomain 1; IPR015422: Pyridoxal phosphate-dependent transferase, major region, subdomain 2; IPR015424: Pyridoxal phosphate-dependent transferase, major domain	EMQU_0676	721282	722448	-	38.389	100.821	127.298	29.6769	1.26261	0.294352
	general stress protein 13	KO: K07570; InterPro: IPR003029: Ribosomal protein S1, RNA-binding domain; IPR012340: Nucleic acid-binding, OB-fold; IPR016027: Nucleic acid-binding, OB-fold-like; IPR022967: RNA-binding domain, S1	EMQU_0677	722539	722919	+	34.9081	123.781	20.3786	40.2557	0.164635	0.325218
	hypothetical protein		EMQU_0678	722991	723353	+	34.7107	186.172	75.575	171.733	0.405941	0.922444
	conserved domain protein		EMQU_0679	726761	726952	+	48.4375	0	0	0	#DIV/0!	#DIV/0!
	hypothetical protein HMPREF0357_10597		EMQU_0680	728199	728360	+	54.321	0	0	0	#DIV/0!	#DIV/0!
	hypothetical protein		EMQU_0681	729118	729291	+	34.4828	64.2666	74.3703	34.1211	1.15722	0.530931
	hypothetical protein		EMQU_0682	729709	730095	+	35.6589	64.0716	26.7503	3.83532	0.417505	0.0598598
	hypothetical protein		EMQU_0683	730076	730309	+	33.3333	74.7985	4.42408	40.1725	0.0591466	0.537076
	aminopeptidase C	KO: K01372; InterPro: IPR000169: Peptidase, cysteine peptidase active site; IPR004134: Peptidase C1B, bleomycin hydrolase	EMQU_0684	731067	732395	+	37.0956	235.962	72.8325	173.109	0.308663	0.733631
	fructosamine-3-kinase	InterPro: IPR011009: Protein kinase-like domain; IPR016477: Fructosamine/Ketosamine-3-kinase	EMQU_0685	732577	733410	+	40.8873	227.355	328.941	308.481	1.44682	1.35682
fat	acyl-ACP thioesterase	KO: K01071: oleoyl-[acyl-carrier-protein] hydrolase [EC:3.1.2.14]; InterPro: IPR002864: Acyl-ACP thioesterase	EMQU_0686	733425	734174	+	36	311.162	235.343	226.268	0.756337	0.727172
	hypothetical protein		EMQU_0687	734126	734338	-	33.3333	283.04	442.283	0	1.56262	0
	L-asparaginase	KO: K01424: L-asparaginase [EC:3.5.1.1]; InterPro: IPR006034: Asparaginase/glutaminase; IPR020827: Asparaginase/glutaminase, conserved site	EMQU_0688	734379	735347	-	40.4541	180.126	71.0455	155.218	0.394421	0.861715
	hypothetical protein	InterPro: IPR002763: Protein of unknown function DUF72	EMQU_0689	735491	736324	+	38.2494	255.337	117.302	347.634	0.459399	1.36147
	HAD superfamily hydrolase	KO: K07024; InterPro: IPR000150: Cof protein; IPR013200: HAD superfamily hydrolase-like, type 3; IPR023214: HAD-like domain	EMQU_0690	736445	737284	+	40.119	445.096	343.846	669.098	0.772521	1.50327
	cof family protein	KO: K07024; InterPro: IPR021130: Phosphoribosyl-ATP pyrophosphohydrolase-like; IPR023292: NTP pyrophosphohydrolase-like domain	EMQU_0691	737316	737870	+	40.5405	528.239	789.949	698.898	1.49544	1.32307
ezrA	septation ring formation regulator EzrA	KO: K06286; InterPro: IPR010379: Septation ring formation regulator, EzrA	EMQU_0692	738074	739795	+	37.863	999.203	925.519	988.075	0.926257	0.988863
iscS2	pyridoxal phosphate-dependent transferase	KO: K04487: cysteine desulfurase [EC:2.8.1.7]; InterPro: IPR000192: Aminotransferase, class V/Cysteine desulfurase; IPR015421: Pyridoxal phosphate-dependent transferase, major region, subdomain 1; IPR015422: Pyridoxal phosphate-dependent transferase, major region, subdomain 2; IPR015424: Pyridoxal phosphate-dependent transferase, major domain; IPR016454: Cysteine desulfurase, NifS; IPR020578: Ami…	EMQU_0693	739994	741136	+	40.8574	211.406	18.5672	140.679	0.0878274	0.665444
	thiazole biosynthesis protein ThiI	KO: K03151: thiamine biosynthesis protein ThiI; InterPro: IPR003720: Thiamine biosynthesis protein; IPR004114: THUMP; IPR014729: Rossmann-like alpha/beta/alpha sandwich fold; IPR020536: Thiamine biosynthesis protein, C-terminal	EMQU_0694	741156	742367	+	42.5743	145.215	25.1975	113.075	0.173519	0.778674
	redox-sensing transcriptional regulator	KO: K01926; InterPro: IPR003781: CoA-binding; IPR009718: Rex DNA-binding, C-terminal; IPR011991: Winged helix-turn-helix transcription repressor DNA-binding; IPR016040: NAD(P)-binding domain; IPR022876: Transcriptional repressor, redox-sensing, Rex	EMQU_0695	742627	743280	+	38.0734	78.0581	65.6915	35.5558	0.841572	0.455505
valS	valine--tRNA ligase	KO: K01873: valyl-tRNA synthetase [EC:6.1.1.9]; InterPro: IPR001412: Aminoacyl-tRNA synthetase, class I, conserved site; IPR002300: Aminoacyl-tRNA synthetase, class Ia; IPR002303: Valyl-tRNA synthetase; IPR009008: Valyl/Leucyl/Isoleucyl-tRNA synthetase, class Ia, editing domain; IPR009080: Aminoacyl-tRNA synthetase, class 1a, anticodon-binding; IPR010978: tRNA-binding arm; IPR011321: Valyl-tRNA s…	EMQU_0696	743644	746289	+	41.3454	391.562	325.907	211.664	0.832327	0.540564
	bifunctional folylpolyglutamate synthase/ dihydrofolate synthase family protein	KO: K11754: dihydrofolate synthase / folylpolyglutamate synthase [EC:6.3.2.12 6.3.2.17]; InterPro: IPR001645: Folylpolyglutamate synthetase; IPR004101: Mur ligase, C-terminal; IPR013221: Mur ligase, central; IPR018109: Folylpolyglutamate synthetase, conserved site	EMQU_0697	746411	747724	+	40.8676	370.748	147.328	322.683	0.39738	0.870357
	HAD superfamily hydrolase	InterPro: IPR005833: Haloacid dehalogenase/epoxide hydrolase; IPR005834: Haloacid dehalogenase-like hydrolase; IPR006402: HAD-superfamily hydrolase, subfamily IA, variant 3; IPR006439: HAD-superfamily hydrolase, subfamily IA, variant 1; IPR023214: HAD-like domain	EMQU_0698	747714	748367	+	37.9205	344.942	171.748	186.857	0.497902	0.541706
	DNA repair protein RadC	KO: K03630; InterPro: IPR001405: Uncharacterised protein family UPF0758; IPR010994: RuvA domain 2-like; IPR020891: Uncharacterised protein family UPF0758, conserved site	EMQU_0699	748431	749123	+	43.1457	98.2203	21.6608	32.127	0.220532	0.327091
	cold-shock domain-containing protein	KO: K03704; InterPro: IPR002059: Cold-shock protein, DNA-binding; IPR011129: Cold shock protein; IPR012156: Cold shock, CspA; IPR012340: Nucleic acid-binding, OB-fold; IPR016027: Nucleic acid-binding, OB-fold-like; IPR019844: Cold-shock conserved site	EMQU_0700	749273	749473	+	39.801	3858.08	2183.78	3145.76	0.566028	0.81537
	metallo-beta-lactamase superfamily protein	KO: K12574: ribonuclease J [EC:3.1.-.-]; InterPro: IPR001279: Beta-lactamase-like; IPR001587: Ribonuclease J, conserved site; IPR004613: Ribonuclease J; IPR011108: RNA-metabolising metallo-beta-lactamase	EMQU_0701	749805	751484	-	42.2619	446.543	443.056	418.775	0.992191	0.937817
	hypothetical protein	InterPro: IPR009907: Uncharacterised protein family UPF0356	EMQU_0702	751486	751698	-	36.1502	406.3	578.371	153.305	1.42351	0.377319
	ABC transporter ATP-binding protein/permease	KO: K06147; InterPro: IPR001140: ABC transporter, transmembrane domain; IPR003439: ABC transporter-like; IPR003593: ATPase, AAA+ type, core; IPR011527: ABC transporter, transmembrane domain, type 1; IPR017871: ABC transporter, conserved site; IPR017940: ABC transporter, integral membrane type 1	EMQU_0703	752083	753813	+	38.7637	280.873	346.274	267.242	1.23285	0.951472
	ABC transporter ATP-binding protein/permease	KO: K06147; InterPro: IPR001140: ABC transporter, transmembrane domain; IPR003439: ABC transporter-like; IPR003593: ATPase, AAA+ type, core; IPR011527: ABC transporter, transmembrane domain, type 1; IPR017871: ABC transporter, conserved site; IPR017940: ABC transporter, integral membrane type 1	EMQU_0704	753810	755570	+	40.0909	319.71	210.163	345.29	0.657355	1.08001
	isoleucine patch superfamily carbonic anhydrases/acetyltransferase	InterPro: IPR001451: Bacterial transferase hexapeptide repeat; IPR011004: Trimeric LpxA-like	EMQU_0705	755643	756131	+	42.7403	98.4312	21.1704	118.377	0.215079	1.20264
clpP2	endopeptidase ClpP	KO: K01358: ATP-dependent Clp protease, protease subunit [EC:3.4.21.92]; InterPro: IPR001907: Peptidase S14, ClpP; IPR018215: Peptidase S14, ClpP, active site; IPR023562: Peptidase S14/S49	EMQU_0706	756214	756807	-	40.2357	302.027	178.639	376.481	0.591466	1.24651
	hypothetical protein		EMQU_0707	756988	757515	+	35.9848	99.4481	8.82302	84.3334	0.0887199	0.848014
glpQ2	glycerophosphodiester phosphodiesterase	KO: K01126: glycerophosphoryl diester phosphodiesterase [EC:3.1.4.46]; InterPro: IPR004129: Glycerophosphoryl diester phosphodiesterase; IPR017946: PLC-like phosphodiesterase, TIM beta/alpha-barrel domain	EMQU_0708	757650	758384	+	41.0884	299.652	49.2969	127.896	0.164514	0.426815
miaA	tRNA isopentenyltransferase	KO: K00791: tRNA dimethylallyltransferase [EC:2.5.1.75]; InterPro: IPR002627: tRNA isopentenyltransferase; IPR018022: tRNA delta(2)-isopentenylpyrophosphate transferase	EMQU_0709	758392	759315	+	42.0996	263.09	319.87	78.1757	1.21582	0.297144
hflX	hflX subfamily GTP-binding protein	KO: K03665; InterPro: IPR006073: GTP binding domain; IPR016496: HflX GTPase	EMQU_0710	759312	760556	+	42.1687	353.025	292.693	266.254	0.829099	0.754207
	regulatory protein GlnR	KO: K03713; InterPro: IPR000551: Transcription regulator HTH, MerR; IPR009061: DNA binding domain, putative	EMQU_0711	760726	761121	+	38.3838	290.978	100.648	232.385	0.345895	0.798636
	glutamine synthetase, type I	KO: K01915: glutamine synthetase [EC:6.3.1.2]; InterPro: IPR004809: Glutamine synthetase type I; IPR008146: Glutamine synthetase, catalytic domain; IPR008147: Glutamine synthetase, beta-Grasp; IPR014746: Glutamine synthetase/guanido kinase, catalytic domain	EMQU_0712	761150	762490	+	41.1633	375.61	263.634	154.219	0.701881	0.410583
	hypothetical protein		EMQU_0713	762820	763017	-	27.7778	71.2097	15.6854	49.9753	0.22027	0.701805
pyrG	CTP synthetase	KO: K01937: CTP synthase [EC:6.3.4.2]; InterPro: IPR004468: CTP synthase; IPR017456: CTP synthase, N-terminal; IPR017926: Glutamine amidotransferase type 1	EMQU_0714	763147	764757	+	40.2235	248.678	240.334	137.279	0.966444	0.552033
fba_2	fructose-bisphosphate aldolase	KO: K01624: fructose-bisphosphate aldolase, class II [EC:4.1.2.13]; InterPro: IPR000771: Ketose-bisphosphate aldolase, class-II; IPR011289: Fructose-1,6-bisphosphate aldolase, class 2; IPR013785: Aldolase-type TIM barrel	EMQU_0715	765020	765889	+	40.1149	1880.5	1363.06	1208.46	0.72484	0.642626
murAB	UDP-N-acetylglucosamine 1-carboxyvinyltransferase	KO: K00790: UDP-N-acetylglucosamine 1-carboxyvinyltransferase [EC:2.5.1.7]; InterPro: IPR001986: Enolpyruvate transferase domain; IPR005750: UDP-N-acetylglucosamine 1-carboxyvinyltransferase; IPR013792: RNA 3'-terminal phosphate cyclase/enolpyruvate transferase, alpha/beta	EMQU_0716	766063	767334	+	41.9811	436.883	246.194	276.939	0.563523	0.633896
rho	transcription termination factor Rho	KO: K03628: transcription termination factor Rho; InterPro: IPR000194: ATPase, F1/V1/A1 complex, alpha/beta subunit, nucleotide-binding domain; IPR003593: ATPase, AAA+ type, core; IPR004665: Transcription termination factor Rho; IPR011112: Rho termination factor, N-terminal; IPR011113: Rho termination factor, RNA-binding; IPR011129: Cold shock protein; IPR012340: Nucleic acid-binding, OB-fold	EMQU_0717	767331	768626	+	41.0494	431.419	399.796	517.661	0.926699	1.1999
	50S ribosomal protein L31p	KO: K02909: large subunit ribosomal protein L31; InterPro: IPR002150: Ribosomal protein L31	EMQU_0718	768723	768986	+	39.7727	622.471	450.955	453.526	0.724459	0.72859
	S-layer protein	InterPro: IPR003610: Carbohydrate-binding module family 5/12; IPR003961: Fibronectin, type III; IPR013783: Immunoglobulin-like fold	EMQU_0719	769680	771899	+	39.5045	83.2218	5.82902	17.6062	0.070042	0.211557
	PTS system transporter subunit IIC	KO: K02761: PTS system, cellobiose-specific IIC component; InterPro: IPR003352: Phosphotransferase system, EIIC; IPR004501: Phosphotransferase system, lactose/cellobiose IIC component	EMQU_0720	772057	773361	-	42.5287	94.6302	51.9601	77.3411	0.549085	0.817299
	hypothetical protein	KO: K06872; InterPro: IPR007621: Protein of unknown function DUF477	EMQU_0721	773921	774724	-	42.5373	451.722	1039.1	583.984	2.3003	1.2928
	hypothetical protein		EMQU_0722	774721	775914	-	40.6198	631.966	1299.68	722.658	2.05656	1.14351
	hypothetical protein		EMQU_0723	775932	777179	-	41.5064	549.691	988.782	726.276	1.79879	1.32124
	DNA polymerase III subunits gamma and tau	KO: K02343: DNA polymerase III subunit gamma/tau [EC:2.7.7.7]; InterPro: IPR001270: Chaperonin ClpA/B; IPR003593: ATPase, AAA+ type, core; IPR003959: ATPase, AAA-type, core; IPR008921: DNA polymerase III, clamp loader complex, gamma/delta/delta subunit, C-terminal; IPR012763: DNA polymerase III, subunit gamma/ tau; IPR022754: DNA polymerase III, gamma subunit, domain III	EMQU_0724	777644	779380	+	42.0265	341.201	177.605	185.142	0.520529	0.542618
	hypothetical protein	KO: K09747; InterPro: IPR004401: Uncharacterised protein family UPF0133	EMQU_0725	779399	779710	+	36.2179	431.65	519.276	442.426	1.203	1.02496
recR	recombination protein RecR	KO: K06187: recombination protein RecR; InterPro: IPR000093: DNA recombination protein RecR; IPR006171: Toprim domain; IPR015967: Recombination protein RecR, conserved site; IPR023627: Recombination protein RecR; IPR023628: Recombination protein RecR, C4-type zinc finger	EMQU_0726	779734	780330	+	42.5461	703.632	507.213	451.662	0.720849	0.6419
tmk	dTMP kinase	KO: K00943: dTMP kinase [EC:2.7.4.9]; InterPro: IPR018094: Thymidylate kinase; IPR018095: Thymidylate kinase, conserved site	EMQU_0727	780420	781082	+	42.3831	563.189	629.26	491.771	1.11732	0.87319
	hypothetical protein	InterPro: IPR010375: Protein of unknown function DUF970; IPR011322: Nitrogen regulatory PII-like, alpha/beta	EMQU_0728	781079	781408	+	38.7879	648.254	418.8	356.824	0.646042	0.550438
holB	DNA-directed DNA polymerase III delta' subunit	KO: K02341: DNA polymerase III subunit delta' [EC:2.7.7.7]; InterPro: IPR004622: DNA polymerase III, delta prime subunit	EMQU_0729	781417	782355	+	37.5932	340.178	388.626	324.568	1.14242	0.954113
	stage 0 sporulation family protein	InterPro: IPR007557: PSP1, C-terminal	EMQU_0730	782395	783219	+	39.1515	314.698	339.432	380.812	1.07859	1.21009
yabA	regulator of replication initiation timing	InterPro: IPR010377: Initiation control protein, YabA	EMQU_0731	783212	783559	+	37.3563	272.434	257.321	207.57	0.944526	0.761908
	tetrapyrrole methylase family protein	KO: K07056; InterPro: IPR000878: Tetrapyrrole methylase; IPR008189: rRNA small subunit methyltransferase I; IPR014777: Tetrapyrrole methylase, subdomain 1; IPR018063: SAM-dependent methyltransferase RsmI, conserved site	EMQU_0732	783699	784568	+	41.2644	190.005	52.9517	32.415	0.278685	0.170601
	hypothetical protein		EMQU_0733	784835	785080	-	46.3415	205.544	10.5207	120.672	0.0511846	0.587087
	hypothetical protein		EMQU_0734	785025	785378	-	49.7175	236.228	55.5634	157.931	0.235211	0.668551
	hypothetical protein		EMQU_0735	785407	785766	-	37.2222	41.8664	0	28.8608	0	0.689354
dinB	DNA-directed DNA polymerase IV	KO: K02346; InterPro: IPR001126: DNA-repair protein, UmuC-like; IPR017961: DNA polymerase, Y-family, little finger domain; IPR017962: DNA polymerase IV/DinB homologue, little finger domain; IPR017963: DNA-repair protein, UmuC-like, N-terminal; IPR022880: DNA polymerase IV; IPR024728: DNA polymerase type-Y, HhH motif	EMQU_0736	786244	787377	+	39.9471	113.616	17.8017	23.5598	0.156683	0.207364
nrdG	anaerobic ribonucleotide reductase small subunit	KO: K04068; InterPro: IPR012837: Ribonucleoside-triphosphate reductase activating, anaerobic	EMQU_0737	787480	788082	-	39.3035	141.1	106.442	96.8179	0.754373	0.686165
nrdD	incomplete anaerobic ribonucleotide reductase large subunit	KO: K00527: ribonucleoside-triphosphate reductase [EC:1.17.4.2]; InterPro: IPR001150: Formate C-acetyltransferase glycine radical; IPR005144: ATP-cone; IPR012833: Ribonucleoside-triphosphate reductase, anaerobic; IPR019777: Formate C-acetyltransferase glycine radical, conserved site	EMQU_0738	788688	790877	-	39.726	418.257	278.899	574.73	0.666812	1.37411
	ABC transporter ATP-binding protein		EMQU_0739	791200	791502	+	33.6634	131.576	128.123	209.006	0.973755	1.58848
	ABC transporter ATP-binding protein	InterPro: IPR003439: ABC transporter-like	EMQU_0740	791499	791966	+	37.6068	186.996	80.7395	270.636	0.43177	1.44728
	ABC superfamily ATP binding cassette transporter, membrane protein	KO: K02004; InterPro: IPR003838: Permease FtsX-like	EMQU_0741	791956	794070	+	37.5887	198.384	158.834	272.525	0.800638	1.37372
	hypothetical protein	InterPro: IPR021008: Protein of unknown function DUF3687	EMQU_0742	794281	794430	+	32.6667	213.924	131.13	23.0886	0.612974	0.107929
	D-alanine--poly(phosphoribitol) ligase subunit 1	KO: K03367: D-alanine--poly(phosphoribitol) ligase subunit 1 [EC:6.1.1.13]; InterPro: IPR000873: AMP-dependent synthetase/ligase; IPR010071: Amino acid adenylation; IPR010072: D-alanine-activating enzyme; IPR020845: AMP-binding, conserved site	EMQU_0743	794441	795940	+	41.6	512.121	573.52	584.801	1.11989	1.14192
	basic membrane protein DtlB	KO: K03739: membrane protein involved in D-alanine export; InterPro: IPR004299: Membrane bound O-acyl transferase, MBOAT; IPR024024: D-alanyl-lipoteichoic acid biosynthesis DltB	EMQU_0744	795937	797145	+	36.9727	297.183	682.878	752.569	2.29783	2.53234
	D-alanine--poly(phosphoribitol) ligase subunit 2	KO: K14188: D-alanine--poly(phosphoribitol) ligase subunit 2 [EC:6.1.1.13]; InterPro: IPR003230: D-alanyl carrier protein; IPR006163: Phosphopantetheine-binding; IPR009081: Acyl carrier protein-like	EMQU_0745	797173	797406	+	35.4701	214.007	437.984	289.665	2.04659	1.35353
	poly(glycerophosphate chain) D-alanine transferprotein DltD	KO: K03740: D-alanine transfer protein; InterPro: IPR006998: DltD, C-terminal; IPR006999: DltD, N-terminal; IPR007002: DltD, central domain; IPR023896: D-alanyl-lipoteichoic acid biosynthesis DltD	EMQU_0746	797409	798674	+	38.4676	301.085	609.611	713.605	2.02472	2.37011
	M42 family peptidase	InterPro: IPR008007: Peptidase M42; IPR023367: Peptidase M42, domain 2	EMQU_0747	798896	799978	+	39.8892	436.359	314.012	292.376	0.719617	0.670036
	hypothetical protein	InterPro: IPR010380: Protein of unknown function DUF975	EMQU_0748	799978	800772	+	36.1006	419.53	442.742	354.731	1.05533	0.845542
	hypothetical protein	InterPro: IPR001279: Beta-lactamase-like	EMQU_0749	800834	801574	+	40.8907	690.246	984.241	615.607	1.42593	0.891866
lplA	lipoate--protein ligase	KO: K03800: lipoate-protein ligase A [EC:2.7.7.63]; InterPro: IPR004143: Biotin/lipoate A/B protein ligase; IPR004562: Lipoyltransferase/lipoate-protein ligase; IPR005107: CO dehydrogenase flavoprotein, C-terminal; IPR019491: Lipoate protein ligase, C-terminal	EMQU_0750	801588	802592	+	37.4129	495.382	652.043	355.437	1.31624	0.7175
	terC family integral membrane protein		EMQU_0751	802823	804655	-	36.2248	65.2498	0.282388	72.0675	0.0043278	1.10449
spsB	signal peptidase I	InterPro: IPR001733: Peptidase S26B, eukaryotic signal peptidase	EMQU_0752	804857	805384	+	39.7727	188.767	229.399	81.5223	1.21525	0.431867
	O-methyltransferase family protein	InterPro: IPR002935: O-methyltransferase, family 3	EMQU_0753	805467	806150	+	41.2281	265.13	252.755	73.7794	0.953323	0.278276
int_1	bacteriophage integrase	InterPro: IPR002104: Integrase, catalytic; IPR011010: DNA breaking-rejoining enzyme, catalytic core; IPR013762: Integrase-like, catalytic core; IPR023109: Integrase/recombinase, N-terminal	EMQU_0754	806636	807763	-	33.9539	117.668	9.17761	22.3693	0.0779955	0.190104
	predicted protein		EMQU_0755	807878	808522	-	31.3178	109.299	214.27	149.577	1.9604	1.36852
	predicted protein	InterPro: IPR001387: Helix-turn-helix type 3; IPR010982: Lambda repressor-like, DNA-binding; IPR011056: Peptidase S24/S26A/S26B/S26C, beta-ribbon domain; IPR015927: Peptidase S24/S26A/S26B/S26C; IPR019759: Peptidase S24/S26A/S26B	EMQU_0756	808613	809452	-	32.0238	121.548	102.291	28.2718	0.841572	0.232598
	predicted protein	InterPro: IPR001387: Helix-turn-helix type 3; IPR010982: Lambda repressor-like, DNA-binding	EMQU_0757	809625	809858	+	32.0513	33.2438	0	2.11434	0	0.0636011
	predicted protein	KO: K07741; InterPro: IPR013557: AntA/AntB antirepressor	EMQU_0758	809919	810668	+	36.8	43.433	22.085	9.89512	0.508484	0.227825
	hypothetical protein	InterPro: IPR008489: Bacteriophage bIL285, Orf7	EMQU_0759	810682	810996	+	30.1587	86.4339	1.64323	3.14131	0.0190114	0.0363435
	hypothetical protein		EMQU_0760	811009	811176	+	33.3333	75.2438	3.08106	200.258	0.0409477	2.66146
	hypothetical protein		EMQU_0761	811274	811609	+	36.3095	88.2667	0	178.171	0	2.01855
	hypothetical protein		EMQU_0762	811606	811830	+	38.6667	23.7693	0	15.3924	0	0.647575
	hypothetical protein EFJG_00046		EMQU_0763	811842	812195	+	34.7458	86.5254	54.1013	164.919	0.625264	1.90601
	predicted protein		EMQU_0764	812188	812379	+	38.5417	15.1935	97.0533	0	6.38783	0
	recT protein	KO: K07455; InterPro: IPR018330: DNA single-strand annealing protein RecT-like	EMQU_0765	812382	813404	+	39.8827	107.884	0	106.883	0	0.99072
	hypothetical protein	InterPro: IPR016974: Uncharacterised phage-associated protein; IPR024432: Putative exodeoxyribonuclease 8, PDDEXK-like domain	EMQU_0766	813367	814182	+	37.6225	126.91	10.1494	77.0024	0.0799729	0.606748
	DnaD and phage-associated domain protein		EMQU_0767	814200	814991	+	36.6162	75.5069	6.53557	10.6198	0.086556	0.140646
	DNA replication protein DnaC	KO: K02315; InterPro: IPR002611: IstB-like ATP-binding protein; IPR003593: ATPase, AAA+ type, core	EMQU_0768	814991	815839	+	39.2226	150.61	0.609679	27.9721	0.00404806	0.185725
	predicted protein		EMQU_0769	815836	816078	+	40.7407	66.0259	0	44.7927	0	0.678412
	hypothetical protein		EMQU_0770	816075	816263	+	40.2116	54.0212	0	13.0888	0	0.24229
	phage protein	InterPro: IPR009414: Bacteriophage 92, Orf34	EMQU_0771	816221	816667	+	36.689	50.033	83.3746	81.9059	1.66639	1.63704
	hypothetical protein		EMQU_0772	816688	817122	-	32.6437	15.6475	13.0892	34.1211	0.836502	2.18061
	hypothetical protein		EMQU_0773	817174	817746	+	36.9983	52.607	6.32342	125.2	0.120201	2.37991
	predicted protein		EMQU_0774	817746	817934	+	37.5661	41.159	19.171	57.5906	0.46578	1.39922
	predicted protein		EMQU_0775	817945	818139	+	34.359	54.8523	0	76.1163	0	1.38766
	hypothetical protein		EMQU_0776	818136	818267	+	37.8788	51.5657	94.1122	33.7334	1.8251	0.654183
	yopX protein	InterPro: IPR010024: Conserved hypothetical protein CHP1671; IPR019096: YopX protein; IPR023385: YopX-like domain, beta barrel type	EMQU_0777	818264	818659	+	35.101	106.815	31.3707	7.4963	0.293694	0.0701805
	DNA (cytosine-5-)-methyltransferase	KO: K00558: DNA (cytosine-5-)-methyltransferase [EC:2.1.1.37]; InterPro: IPR001525: C-5 cytosine methyltransferase; IPR018117: DNA methylase, C-5 cytosine-specific, active site	EMQU_0778	818656	819714	+	42.3041	83.5568	21.0175	36.4409	0.251536	0.436122
	hypothetical protein		EMQU_0779	819728	819943	+	37.037	56.272	21.5674	11.4527	0.38327	0.203523
	phage protein, putative	InterPro: IPR012865: Protein of unknown function DUF1642	EMQU_0780	819936	820511	+	39.0625	52.333	35.047	98.7794	0.669692	1.88752
	hypothetical protein		EMQU_0781	820508	820729	+	36.036	111.692	2.33161	191.662	0.0208753	1.71598
	hypothetical protein		EMQU_0782	820726	821082	+	36.1345	83.0746	0	108.098	0	1.30122
	predicted protein		EMQU_0783	821072	821269	+	38.3838	29.4661	23.5281	4.99753	0.798479	0.169603
	hypothetical protein		EMQU_0784	821269	821463	+	29.7436	92.2515	23.89	2.53721	0.258966	0.0275032
	phage protein	InterPro: IPR013249: RNA polymerase sigma factor 70, region 4 type 2; IPR013324: RNA polymerase sigma factor, region 3/4	EMQU_0785	821814	822290	+	36.2683	60.1368	0	21.7817	0	0.362203
	hypothetical protein		EMQU_0786	822498	823568	+	29.0383	89.43	57.0297	119.647	0.637703	1.33788
	hypothetical protein		EMQU_0787	823671	823898	+	41.6667	2.13241	0	104.159	0	48.8456
	hypothetical protein		EMQU_0788	823895	824194	+	30	35.654	0	21.4394	0	0.601319
	Phage endonuclease	InterPro: IPR002711: HNH endonuclease; IPR003615: HNH nuclease	EMQU_0789	824181	824522	+	30.9942	34.1186	0	0	0	0
	bacteriophage terminase small subunit	InterPro: IPR006448: Streptococcus phage 7201, Orf21	EMQU_0790	824680	825144	+	29.6774	43.914	38.9604	30.8557	0.887199	0.70264
	bacteriophage terminase large subunit	InterPro: IPR005021: Bacteriophage bIL285, Orf41, terminase	EMQU_0791	825183	826925	+	32.9891	28.7307	32.6666	19.8697	1.13699	0.691585
	hypothetical protein		EMQU_0792	826940	827110	+	29.8246	36.9618	60.54	49.1863	1.63791	1.33073
	bacteriophage portal protein	InterPro: IPR006427: Bacteriophage 16-3, portal protein; IPR006944: Bacteriophage/Gene transfer agent portal protein	EMQU_0793	827137	828399	+	37.213	85.8436	75.409	21.1535	0.878447	0.246419
	bifunctional family U35 bacteriophage prohead peptidase/major capsid protein	KO: K06904; InterPro: IPR006433: Prohead protease, HK97 family	EMQU_0794	828335	828955	+	37.6812	64.982	8.33522	78.8741	0.12827	1.21378
	bifunctional family U35 bacteriophage prohead peptidase/major capsid protein	InterPro: IPR006444: Bacteriophage 16-3, major capsid protein; IPR024455: Caudovirus, capsid	EMQU_0795	829013	830227	+	38.8477	89.235	26.8394	25.2468	0.300772	0.282925
	hypothetical protein		EMQU_0796	830245	830538	+	28.2313	29.7668	5.28181	40.3882	0.17744	1.35682
	hypothetical protein spyM18_0758	InterPro: IPR006450: Bacteriophage HK022, Gp6; IPR021146: Bacteriophage QLRG family, putative DNA packaging	EMQU_0797	830525	830878	+	33.0508	68.671	4.38659	48.9165	0.0638783	0.712332
	hypothetical protein	InterPro: IPR008767: Bacteriophage SPP1, head-tail adaptor	EMQU_0798	830865	831200	+	33.9286	52.0918	6.16211	19.1423	0.118293	0.367473
	phage protein	InterPro: IPR010064: Bacteriophage HK97, Gp10	EMQU_0799	831197	831562	+	36.612	83.6885	0	22.9805	0	0.274595
	unnamed protein product		EMQU_0800	831559	831975	+	29.4964	38.4755	0	1.18646	0	0.0308369
	unnamed protein product	InterPro: IPR006490: Bacteriophage bIL285, Orf50, major tail protein; IPR006724: Bacteriophage bIL286, Orf50, major tail	EMQU_0801	832016	832594	+	40.2418	94.8869	11.6218	21.3625	0.122481	0.225137
	hypothetical protein		EMQU_0802	832665	832991	+	30.581	66.9069	3.16586	16.6432	0.0473173	0.248751
	hypothetical protein		EMQU_0803	833009	833173	+	32.7273	38.3059	0	0	0	0
	TP901 family phage tail tape measure protein	InterPro: IPR010090: Bacteriophage bIL285, Orf52, tail tape measure protein	EMQU_0804	833185	837780	+	38.7728	76.1656	31.5346	43.9209	0.414026	0.57665
	protein gp17	InterPro: IPR008841: Siphovirus tail component	EMQU_0805	837777	838598	+	38.0779	76.3	0	79.4498	0	1.04128
	protein gp18	InterPro: IPR010572: Bacteriophage 53, Orf003	EMQU_0806	838607	839635	+	39.9417	41.579	7.04241	22.1174	0.169374	0.531936
	hypothetical protein	InterPro: IPR011050: Pectin lyase fold/virulence factor; IPR012334: Pectin lyase fold	EMQU_0807	839635	840681	+	42.5024	130.022	33.6179	125.225	0.258555	0.963102
	hypothetical protein	InterPro: IPR018913: Domain of unknown function DUF2479	EMQU_0808	840682	842868	+	38.4088	54.9104	32.1884	23.7537	0.586198	0.43259
	hypothetical protein		EMQU_0809	842881	843228	+	37.931	79.6346	16.3615	28.4342	0.205457	0.357059
	hypothetical protein	InterPro: IPR010022: Protein of unknown function XkdX	EMQU_0810	843221	843349	+	34.1085	41.4581	0	0	0	0
	hypothetical protein EfmU0317_0103		EMQU_0811	843360	843593	+	41.0256	195.307	13.2722	23.2578	0.0679557	0.119083
	conserved hypothetical protein	InterPro: IPR009708: Bacteriophage A118, holin	EMQU_0812	843595	843852	+	42.2481	96.1074	130.407	38.3532	1.35689	0.399066
	N-acetylmuramoyl-L-alanine amidase	InterPro: IPR002502: N-acetylmuramoyl-L-alanine amidase domain	EMQU_0813	843921	844814	+	42.17	110.943	0	31.5448	0	0.284334
	hypothetical protein	InterPro: IPR003675: CAAX amino terminal protease	EMQU_0814	845325	845630	-	33.3333	69.9097	15.224	27.4864	0.217767	0.39317
	hypothetical protein	InterPro: IPR000620: Drug/metabolite transporter	EMQU_0815	845682	846014	-	37.2372	49.6411	1.55441	0	0.0313129	0
	predicted protein		EMQU_0816	846388	846738	+	38.4615	130.205	7.37347	156.461	0.0566297	1.20165
	tetR family transcriptional regulator	InterPro: IPR001647: DNA-binding HTH domain, TetR-type; IPR009057: Homeodomain-like; IPR015893: Tetracycline transcriptional regulator, TetR-like, C-terminal	EMQU_0817	846823	847359	-	35.9404	181.077	85.7876	112.403	0.473764	0.620747
	hypothetical protein	InterPro: IPR000182: GCN5-related N-acetyltransferase (GNAT) domain; IPR016181: Acyl-CoA N-acyltransferase	EMQU_0818	847506	848111	+	39.4389	49.7423	0	75.9279	0	1.52643
	hypothetical protein		EMQU_0819	848222	848398	+	37.2881	52.1899	67.261	75.4712	1.28877	1.44609
	hypothetical protein	KO: K08987; InterPro: IPR009732: Protein of unknown function DUF1304	EMQU_0820	848395	848754	+	38.8889	244.446	208.485	173.165	0.852888	0.708397
sulP	sulP family sulfate permease	KO: K03321; InterPro: IPR002645: Sulphate transporter/antisigma-factor antagonist STAS; IPR011547: Sulphate transporter	EMQU_0821	848879	850513	+	41.3456	201.91	272.897	239.056	1.35157	1.18397
	merR family transcriptional regulator	InterPro: IPR000551: Transcription regulator HTH, MerR; IPR009061: DNA binding domain, putative; IPR015358: Transcription regulator MerR, DNA binding	EMQU_0822	850596	850970	+	40.5333	333.203	347.839	192.625	1.04393	0.578102
	uracil-DNA glycosylase	KO: K02334; InterPro: IPR005122: Uracil-DNA glycosylase-like	EMQU_0823	851041	851685	-	41.8605	226.889	60.9906	88.2123	0.268813	0.388791
rplU	50S ribosomal protein L21	KO: K02888: large subunit ribosomal protein L21; InterPro: IPR001787: Ribosomal protein L21; IPR018258: Ribosomal protein L21, conserved site	EMQU_0824	851913	852221	+	39.4822	1159.62	814.117	632.455	0.702055	0.545399
	hypothetical protein	KO: K07584; InterPro: IPR007422: Protein of unknown function DUF464	EMQU_0825	852250	852594	+	38.8406	1035.8	622.641	765.796	0.601123	0.73933
rpmA	50S ribosomal protein L27	KO: K02899: large subunit ribosomal protein L27; InterPro: IPR001684: Ribosomal protein L27; IPR018261: Ribosomal protein L27, conserved site	EMQU_0826	852607	852900	+	41.4966	792.127	320.43	912.101	0.404518	1.15146
	DNA-directed RNA polymerase sigma subunit SigL	InterPro: IPR002078: RNA polymerase sigma factor 54, interaction; IPR003593: ATPase, AAA+ type, core; IPR004701: Phosphotransferase system, fructose subfamily IIA component; IPR011608: PRD; IPR011991: Winged helix-turn-helix transcription repressor DNA-binding	EMQU_0827	853281	856136	+	39.2857	265.056	288.351	321.868	1.08789	1.21434
	PTS system transporter subunit IIB	KO: K02794: PTS system, mannose-specific IIB component [EC:2.7.1.69]; InterPro: IPR004720: Phosphotransferase system, sorbose subfamily IIB component; IPR018455: Phosphotransferase system, sorbose subfamily IIB component, subgroup	EMQU_0828	856300	856791	+	40.8537	449.627	472.378	1211.75	1.0506	2.69501
	PTS system mannose-specific transporter subunitIIAB	KO: K02793: PTS system, mannose-specific IIA component [EC:2.7.1.69]; InterPro: IPR004701: Phosphotransferase system, fructose subfamily IIA component; IPR004720: Phosphotransferase system, sorbose subfamily IIB component; IPR013789: Phosphotransferase system, fructose subfamily IIA component, subgroup	EMQU_0829	856892	857863	+	40.2263	448.676	452.116	1052.63	1.00767	2.34608
manM	PTS family mannose/fructose/sorbose porter component IIC	KO: K02795: PTS system, mannose-specific IIC component; InterPro: IPR004700: Phosphotransferase system, sorbose-specific IIC subunit	EMQU_0830	857896	858702	+	41.5118	447.03	611.905	912.877	1.36882	2.04209
	PTS system mannose/fructose/sorbose transportersubunit IID	KO: K02796: PTS system, mannose-specific IID component; InterPro: IPR004704: Phosphotransferase system, mannose/fructose/sorbose family IID component; IPR018405: Phosphotransferase system, mannose/fructose/sorbose family IID component, subgroup	EMQU_0831	858719	859633	+	40.8743	455.903	508	760.788	1.11427	1.66875
	hypothetical protein	InterPro: IPR010360: Protein of unknown function DUF956	EMQU_0832	859949	860323	+	41.3333	193.18	91.1007	176.793	0.471585	0.915173
	integral membrane protein	InterPro: IPR007341: Transglycosylase-associated protein	EMQU_0833	860401	860646	+	41.0569	664.065	492.368	398.218	0.741445	0.599667
	proline dipeptidase	KO: K01262; InterPro: IPR000587: Creatinase; IPR000994: Peptidase M24, structural domain; IPR001131: Peptidase M24B, X-Pro dipeptidase/aminopeptidase P, conserved site	EMQU_0834	860799	861863	+	41.9718	819.448	946.292	588.597	1.15479	0.718285
asp	alkaline shock protein	InterPro: IPR005531: Alkaline shock protein Asp23	EMQU_0835	862077	862502	+	39.9061	2077.15	1368.16	1289.15	0.658672	0.620635
nusB	N utilization substance B	KO: K03625; InterPro: IPR006027: NusB/RsmB/TIM44; IPR011605: NusB antitermination factor	EMQU_0836	862495	862944	+	38.2222	1462.89	1231.93	1079.67	0.842118	0.738036
	bifunctional 5,10-methylene-tetrahydrofolate dehydrogenase/ 5,10-methylene-tetrahydrofolate cyclohydrolase	KO: K01491: methylenetetrahydrofolate dehydrogenase (NADP+) / methenyltetrahydrofolate cyclohydrolase [EC:1.5.1.5 3.5.4.9]; InterPro: IPR000672: Tetrahydrofolate dehydrogenase/cyclohydrolase; IPR016040: NAD(P)-binding domain; IPR020630: Tetrahydrofolate dehydrogenase/cyclohydrolase, catalytic domain; IPR020631: Tetrahydrofolate dehydrogenase/cyclohydrolase, NAD(P)-binding domain; IPR020867: Tetra…	EMQU_0837	863039	863893	+	41.1696	487.328	318.441	421.844	0.653442	0.865628
xseA	exodeoxyribonuclease VII large subunit	KO: K03601: exodeoxyribonuclease VII large subunit [EC:3.1.11.6]; InterPro: IPR003753: Exonuclease VII, large subunit; IPR004365: Nucleic acid binding, OB-fold, tRNA/helicase-type; IPR020579: Exonuclease VII, large subunit, C-terminal	EMQU_0838	863890	865230	+	43.1767	618.524	665.067	589.206	1.07525	0.9526
xseB	exodeoxyribonuclease VII small subunit	KO: K03602: exodeoxyribonuclease VII small subunit [EC:3.1.11.6]; InterPro: IPR003761: Exonuclease VII, small subunit	EMQU_0839	865232	865459	+	36.8421	511.779	585.725	492.586	1.14449	0.962496
	octaprenyl-diphosphate synthase/ dimethylallyltransferase/ geranyltranstransferase	KO: K13789: geranylgeranyl diphosphate synthase, type II [EC:2.5.1.1 2.5.1.10 2.5.1.29]; InterPro: IPR000092: Polyprenyl synthetase; IPR008949: Terpenoid synthase; IPR017446: Polyprenyl synthetase-related	EMQU_0840	865456	866343	+	42.6802	632.376	526.944	967.225	0.833276	1.52951
hlyA	hemolysin A	KO: K06442; InterPro: IPR002877: Ribosomal RNA methyltransferase RrmJ/FtsJ; IPR002942: RNA-binding S4; IPR004538: Haemolysin A	EMQU_0841	866352	867173	+	39.1727	535.874	768.24	834.825	1.43362	1.55788
	argR family transcriptional regulator	KO: K03402; InterPro: IPR001669: Arginine repressor; IPR011991: Winged helix-turn-helix transcription repressor DNA-binding; IPR020899: Arginine repressor, C-terminal; IPR020900: Arginine repressor, DNA-binding domain; IPR024946: Arginine repressor C-terminal-like domain	EMQU_0842	867273	867722	+	34.2222	736.849	522.218	592.608	0.708719	0.804246
recN	DNA repair protein RecN	KO: K03631; InterPro: IPR003395: RecF/RecN/SMC; IPR004604: DNA recombination/repair protein RecN	EMQU_0843	867740	869419	+	40.4167	635.52	686.151	929.729	1.07967	1.46294
	hypothetical protein		EMQU_0844	869502	869747	+	22.7642	63.2443	71.5406	54.3025	1.13118	0.858615
	hypothetical protein		EMQU_0845	870274	871731	+	35.2538	44.3507	22.0112	54.2942	0.496298	1.2242
	hypothetical protein		EMQU_0846	871786	872400	+	35.4472	20.5544	24.408	11.2627	1.18748	0.547948
	hypothetical protein		EMQU_0847	872588	873790	+	38.6534	94.5707	6.02381	32.4902	0.0636964	0.343555
	hypothetical protein		EMQU_0848	873885	874376	+	36.7886	125.5	30.51	36.2016	0.243107	0.288458
	cation transporter	KO: K03284; InterPro: IPR002523: Mg2+ transporter protein, CorA-like/Zinc transport protein ZntB	EMQU_0849	874696	875652	-	35.3187	67.5688	56.7919	101.846	0.840504	1.5073
	lipoprotein	InterPro: IPR024515: Protein of unknown function DUF3397	EMQU_0850	875862	876230	+	36.8564	40.8453	43.4855	28.1568	1.06464	0.689354
	cell division protein MraZ	KO: K03925; InterPro: IPR003444: MraZ; IPR020603: MraZ domain	EMQU_0851	876347	876832	+	40.535	490.192	402.591	241.27	0.821293	0.492194
mraW	S-adenosyl-methyltransferase	KO: K03438; InterPro: IPR002903: S-adenosyl-L-methionine-dependent methyltransferase, MraW; IPR023397: S-adenosyl-L-methionine-dependent methyltransferase, MraW, recognition domain	EMQU_0852	876854	877813	+	42.0833	719.157	692.852	533.409	0.963423	0.741714
	cell division protein FtsL	InterPro: IPR007060: Septum formation initiator; IPR011922: Cell division protein, FtsL -like	EMQU_0853	877818	878216	+	37.0927	622.665	625.292	431.516	1.00422	0.693015
	penicillin-binding protein C	KO: K12556: penicillin-binding protein 2X [EC:2.3.2.-]; InterPro: IPR001460: Penicillin-binding protein, transpeptidase; IPR005311: Penicillin-binding protein, dimerisation domain; IPR005543: PASTA; IPR012338: Beta-lactamase/transpeptidase-like	EMQU_0854	878217	880409	+	40.8573	560.904	324.543	285.844	0.578608	0.509613
	phospho-N-acetylmuramoyl-pentapeptide- transferase	KO: K01000: phospho-N-acetylmuramoyl-pentapeptide-transferase [EC:2.7.8.13]; InterPro: IPR000715: Glycosyl transferase, family 4; IPR003524: Phospho-N-acetylmuramoyl-pentapeptide transferase; IPR018480: Phospho-N-acetylmuramoyl-pentapeptide transferase, conserved site	EMQU_0855	880426	881388	+	39.1485	383.702	242.415	232.222	0.631779	0.605214
murD	UDP-N-acetylmuramoylalanine--D-glutamate ligase	KO: K01925: UDP-N-acetylmuramoylalanine--D-glutamate ligase [EC:6.3.2.9]; InterPro: IPR004101: Mur ligase, C-terminal; IPR005762: UDP-N-acetylmuramoylalanine-D-glutamate ligase; IPR013221: Mur ligase, central; IPR016040: NAD(P)-binding domain	EMQU_0856	881401	882771	+	39.1685	371.292	194.059	326.229	0.522659	0.87863
murG	UDP-N-acetylglucosamine:LPS N-acetylglucosaminetransferase	KO: K02563: UDP-N-acetylglucosamine--N-acetylmuramyl-(pentapeptide) pyrophosphoryl-undecaprenol N-acetylglucosamine transferase [EC:2.4.1.227]; InterPro: IPR004276: Glycosyl transferase, family 28; IPR006009: N-acetylglucosaminyltransferase, MurG; IPR007235: Glycosyl transferase, family 28, C-terminal	EMQU_0857	882790	883878	+	40.8632	388.863	209.614	341.65	0.539042	0.878586
ftsQ	cell division protein FtsQ	KO: K03589: cell division protein FtsQ; InterPro: IPR005548: Cell division protein FtsQ; IPR013685: Polypeptide-transport-associated, FtsQ-type	EMQU_0858	883893	885068	+	35.9694	615.593	267.172	408.089	0.434007	0.662921
	cell division protein FtsA	KO: K03590: cell division protein FtsA; InterPro: IPR003494: Cell division protein FtsA domain; IPR020823: Cell division protein FtsA; IPR021873: Cell division protein FtsA, C-terminal, Firmicutes	EMQU_0859	885223	886551	+	40.2558	2350.1	2003.09	1812.99	0.852341	0.77145
	cell division protein FtsZ	KO: K03531: cell division protein FtsZ; InterPro: IPR000158: Cell division protein FtsZ; IPR003008: Tubulin/FtsZ, GTPase domain; IPR008280: Tubulin/FtsZ, C-terminal; IPR018316: Tubulin/FtsZ, 2-layer sandwich domain; IPR020805: Cell division protein FtsZ, conserved site; IPR024757: Cell division protein FtsZ, C-terminal	EMQU_0860	886573	887820	+	42.6282	3439.95	3247.55	2754.85	0.944068	0.800841
alr2	alanine racemase	KO: K06997; InterPro: IPR001608: Alanine racemase, N-terminal; IPR011078: Uncharacterised protein family UPF0001	EMQU_0861	887836	888522	+	38.4279	2537.11	3344.55	3085.92	1.31825	1.21632
	hypothetical protein	KO: K09772; InterPro: IPR007561: Cell division protein SepF/SepF-related; IPR023052: Cell division protein SepF	EMQU_0862	888522	889121	+	42.1667	2926.87	3025.47	2952.04	1.03369	1.0086
	hypothetical protein	KO: K02221; InterPro: IPR003425: Uncharacterised protein family Ycf19	EMQU_0863	889152	889421	+	35.5556	2841.51	3479.54	3516.43	1.22454	1.23752
	30S ribosomal protein S4e	InterPro: IPR002942: RNA-binding S4	EMQU_0864	889455	890237	+	39.0805	3134.47	3046.21	2771.39	0.971842	0.884166
divIVA	cell division initiation protein DivIVA	KO: K04074; InterPro: IPR007793: DivIVA; IPR019933: DivIVA domain	EMQU_0865	890258	890965	+	37.5706	2799.03	2978.49	2542.96	1.06412	0.908516
ileS	isoleucyl-tRNA synthetase	KO: K01870: isoleucyl-tRNA synthetase [EC:6.1.1.5]; InterPro: IPR001412: Aminoacyl-tRNA synthetase, class I, conserved site; IPR002300: Aminoacyl-tRNA synthetase, class Ia; IPR002301: Isoleucyl-tRNA synthetase; IPR009008: Valyl/Leucyl/Isoleucyl-tRNA synthetase, class Ia, editing domain; IPR009080: Aminoacyl-tRNA synthetase, class 1a, anticodon-binding; IPR010663: Zinc finger, DNA glycosylase/AP l…	EMQU_0866	891210	894002	+	39.3126	325.868	202.933	220.364	0.622746	0.676237
	ISL3 family transposase	InterPro: IPR002560: Transposase, IS204/IS1001/IS1096/IS1165	EMQU_0867	894133	895428	-	37.4228	0	0	0	#DIV/0!	#DIV/0!
zwf	glucose-6-phosphate 1-dehydrogenase	KO: K00036: glucose-6-phosphate 1-dehydrogenase [EC:1.1.1.49]; InterPro: IPR001282: Glucose-6-phosphate dehydrogenase; IPR016040: NAD(P)-binding domain; IPR019796: Glucose-6-phosphate dehydrogenase, active site; IPR022674: Glucose-6-phosphate dehydrogenase, NAD-binding; IPR022675: Glucose-6-phosphate dehydrogenase, C-terminal	EMQU_0868	895616	897136	-	37.8041	240.698	186.492	229.325	0.774797	0.952749
	iron-dependent repressor	KO: K03709; InterPro: IPR001367: Iron dependent repressor; IPR007167: Ferrous iron transporter, FeoA subunit; IPR011991: Winged helix-turn-helix transcription repressor DNA-binding; IPR022687: Iron dependent repressor, N-terminal; IPR022689: Iron dependent repressor, diptheria toxin type	EMQU_0869	897154	897801	-	38.1173	122.298	173.338	4.58107	1.41734	0.0374583
	hypothetical protein		EMQU_0870	898181	898525	-	35.3623	66.2346	66.015	1.43407	0.996683	0.0216514
sfsA	sugar fermentation stimulation protein	KO: K06206; InterPro: IPR005224: Sugar fermentation stimulation protein	EMQU_0871	898699	899427	+	37.7229	316.791	423.892	352.912	1.33808	1.11402
	gfo/Idh/MocA family oxidoreductase	InterPro: IPR000683: Oxidoreductase, N-terminal; IPR016040: NAD(P)-binding domain	EMQU_0872	899443	900456	+	39.3491	641.541	1009.2	780.68	1.57309	1.21688
	ATP-dependent RNA helicase	InterPro: IPR001650: Helicase, C-terminal; IPR011545: DNA/RNA helicase, DEAD/DEAH box type, N-terminal; IPR014001: DEAD-like helicase	EMQU_0873	900456	901733	+	39.5931	628.852	1513.57	1016.61	2.40687	1.61661
sigL	DNA-directed RNA polymerase sigma subunit SigL	InterPro: IPR002078: RNA polymerase sigma factor 54, interaction; IPR003593: ATPase, AAA+ type, core; IPR004701: Phosphotransferase system, fructose subfamily IIA component; IPR005471: Transcription regulator IclR, N-terminal; IPR011608: PRD; IPR011991: Winged helix-turn-helix transcription repressor DNA-binding	EMQU_0874	901796	904498	+	38.8457	419.458	335.312	314.279	0.799392	0.749249
	PTS system transporter subunit IIB	KO: K02760: PTS system, cellobiose-specific IIB component [EC:2.7.1.69]; InterPro: IPR003501: Phosphotransferase system, EIIB component, type 2/3; IPR013012: Phosphotransferase system, EIIB component, type 3	EMQU_0875	904650	904967	+	33.0189	1322.5	1448.68	1947.91	1.09541	1.4729
	PTS system transporter subunit IIA	KO: K02759: PTS system, cellobiose-specific IIA component [EC:2.7.1.69]; InterPro: IPR003188: Phosphotransferase system, lactose/cellobiose-specific IIA subunit	EMQU_0876	904994	905314	+	40.81	1593.37	1365.8	2683.4	0.857176	1.6841
	PTS family lactose/cellobiose porter component IIC	KO: K02761: PTS system, cellobiose-specific IIC component; InterPro: IPR003352: Phosphotransferase system, EIIC; IPR004501: Phosphotransferase system, lactose/cellobiose IIC component	EMQU_0877	905424	906884	+	42.4367	1663.9	2089.96	3311.58	1.25606	1.99026
	hypothetical protein		EMQU_0878	906992	907213	+	36.4865	922.01	1140.16	2413.61	1.2366	2.61777
	hypothetical protein	InterPro: IPR021524: Protein of unknown function DUF3188	EMQU_0879	907237	907419	+	30.6011	656.224	828.753	1430.2	1.26291	2.17943
	hypothetical protein	InterPro: IPR021701: Domain of unknown function DUF3284	EMQU_0880	907419	907832	+	32.8502	735.158	921.459	1614.53	1.25342	2.19617
	hypothetical protein	InterPro: IPR000182: GCN5-related N-acetyltransferase (GNAT) domain; IPR016181: Acyl-CoA N-acyltransferase	EMQU_0881	908093	909271	+	38.9313	316.704	194.052	315.15	0.612722	0.995092
	hypothetical protein HMPREF0994_04214		EMQU_0882	909306	909584	+	36.2007	254.422	161.408	226.985	0.634408	0.892158
	hypothetical protein		EMQU_0883	910072	910236	+	30.9091	97.2381	128.62	107.947	1.32273	1.11013
	M29 family aminopeptidase	KO: K01269; InterPro: IPR000787: Peptidase M29, aminopeptidase II	EMQU_0884	910297	911529	-	41.6058	296.525	195.208	377.587	0.658321	1.27337
acrR	tetR/AcrR family transcriptional regulator	InterPro: IPR001647: DNA-binding HTH domain, TetR-type; IPR009057: Homeodomain-like; IPR011075: Tetracycline transcriptional regulator, TetR-related, C-terminal; IPR015893: Tetracycline transcriptional regulator, TetR-like, C-terminal	EMQU_0885	911789	912358	+	37.5439	941.674	721.032	913.128	0.765691	0.969686
	flavodoxin	InterPro: IPR001226: Flavodoxin, conserved site; IPR008254: Flavodoxin/nitric oxide synthase; IPR010087: Flavodoxin, short chain	EMQU_0886	912472	912915	-	38.2883	107.312	11.658	70.2018	0.108637	0.654183
	methionine aminopeptidase, type I	KO: K01265; InterPro: IPR000994: Peptidase M24, structural domain; IPR001714: Peptidase M24, methionine aminopeptidase; IPR002467: Peptidase M24A, methionine aminopeptidase, subfamily 1	EMQU_0887	913078	913842	+	40.6536	251.04	98.7871	140.989	0.393512	0.561622
rbn	ribonuclease BN	KO: K07058; InterPro: IPR017039: Uncharacterised protein family UPF0761	EMQU_0888	914175	915098	+	34.8485	106.288	96.353	88.3493	0.906524	0.831222
	UDP-N-acetylglucosamine--dolichyl-phosphate N-acetylglucosaminephosphotransferase	KO: K13685; InterPro: IPR000715: Glycosyl transferase, family 4; IPR018480: Phospho-N-acetylmuramoyl-pentapeptide transferase, conserved site	EMQU_0889	915176	916306	+	34.1291	190.435	141.418	102.801	0.742604	0.53982
	glycosyl transferase family protein	KO: K07011; InterPro: IPR001173: Glycosyl transferase, family 2	EMQU_0890	916306	917106	+	35.7054	250.682	149.922	139.594	0.598054	0.556856
	glycosyl transferase family protein	InterPro: IPR001173: Glycosyl transferase, family 2	EMQU_0891	917106	917933	+	39.372	145.622	254.433	215.111	1.74721	1.47719
	glycosyl transferase family protein	InterPro: IPR001173: Glycosyl transferase, family 2	EMQU_0892	917938	918648	+	39.6624	269.422	323.238	173.965	1.19975	0.645696
rfbA	glucose-1-phosphate thymidylyltransferase	KO: K00973: glucose-1-phosphate thymidylyltransferase [EC:2.7.7.24]; InterPro: IPR005835: Nucleotidyl transferase; IPR005907: Glucose-1-phosphate thymidylyltransferase, short form	EMQU_0893	918747	919613	+	38.639	444.132	315.227	399.457	0.709759	0.899409
	dTDP-4-dehydrorhamnose 3,5-epimerase	KO: K01790: dTDP-4-dehydrorhamnose 3,5-epimerase [EC:5.1.3.13]; InterPro: IPR000888: dTDP-4-dehydrorhamnose 3,5-epimerase-related; IPR011051: Cupin, RmlC-type; IPR014710: RmlC-like jelly roll fold	EMQU_0894	919627	920199	+	38.5689	618.556	330.625	385.098	0.53451	0.622575
rmlB	dTDP-glucose 4,6-dehydratase	KO: K01710: dTDP-glucose 4,6-dehydratase [EC:4.2.1.46]; InterPro: IPR001509: NAD-dependent epimerase/dehydratase; IPR005888: dTDP-glucose 4,6-dehydratase; IPR016040: NAD(P)-binding domain	EMQU_0895	920223	921251	+	40.3304	686.053	284.715	193.287	0.415004	0.281737
	hypothetical protein		EMQU_0896	921552	921686	+	26.6667	154.861	30.6736	164.919	0.198072	1.06495
	dTDP-4-dehydrorhamnose reductase	KO: K00067: dTDP-4-dehydrorhamnose reductase [EC:1.1.1.133]; InterPro: IPR005913: dTDP-4-dehydrorhamnose reductase; IPR016040: NAD(P)-binding domain	EMQU_0897	921702	922553	+	37.2066	269.345	204.738	145.756	0.760134	0.541148
	ykoY family integral membrane protein		EMQU_0898	922600	924615	+	38.7401	248.883	181.526	156.575	0.72936	0.629108
	hypothetical protein		EMQU_0899	924734	925963	+	37.6423	265.626	127.511	278.753	0.480038	1.04942
	ABC transporter permease	KO: K01992; InterPro: IPR000412: ABC-2; IPR013525: ABC-2 type transporter	EMQU_0900	926302	927108	+	35.6877	81.333	62.8581	0.61308	0.772849	0.00753791
tagH	teichoic acid ABC superfamily ATP binding cassette transporter, ABC protein	KO: K01990; InterPro: IPR003439: ABC transporter-like; IPR003593: ATPase, AAA+ type, core; IPR017871: ABC transporter, conserved site	EMQU_0901	927120	928340	+	37.5102	221.792	209.421	100.896	0.944222	0.454913
	methyltransferase	InterPro: IPR010743: Methionine biosynthesis MetW	EMQU_0902	928330	929916	+	36.736	252.439	221.789	267.174	0.878586	1.05837
	family 2 glycosyl transferase	InterPro: IPR001173: Glycosyl transferase, family 2	EMQU_0903	929948	932086	+	39.5044	366.404	191.656	293.06	0.523073	0.799827
rfbP	undecaprenyl-phosphate galactosephosphotransferase	InterPro: IPR003362: Bacterial sugar transferase; IPR017475: Exopolysaccharide biosynthesis polyprenyl glycosylphosphotransferase	EMQU_0904	932299	933690	+	34.0517	166.604	169.564	77.1279	1.01777	0.462941
	putative glycosyltransferase	InterPro: IPR001173: Glycosyl transferase, family 2	EMQU_0905	933720	934544	+	31.7576	287.589	242.182	209.896	0.842112	0.729848
	licD-related protein	InterPro: IPR007074: LicD	EMQU_0906	934557	935432	+	31.9635	190.924	256.445	325.319	1.34318	1.70392
	2-C-methyl-D-erythritol 4-phosphate cytidylyltransferase	KO: K00991: 2-C-methyl-D-erythritol 4-phosphate cytidylyltransferase [EC:2.7.7.60]; InterPro: IPR001228: 4-diphosphocytidyl-2C-methyl-D-erythritol synthase	EMQU_0907	935429	936130	+	35.1852	234.092	325.907	165.623	1.39222	0.707515
	dTDP-glucose 4,6-dehydratase	InterPro: IPR001509: NAD-dependent epimerase/dehydratase; IPR016040: NAD(P)-binding domain	EMQU_0908	936134	937195	+	34.4633	276.973	294.389	292.102	1.06288	1.05462
	glycosyl transferase family protein	InterPro: IPR001173: Glycosyl transferase, family 2	EMQU_0909	937196	938170	+	28.6154	163.559	246.864	143.099	1.50932	0.874903
	hypothetical protein	InterPro: IPR007016: O-antigen ligase-related	EMQU_0910	938227	939657	+	28.0224	112.459	93.6848	102.685	0.833056	0.913089
	licD1 protein	KO: K07271; InterPro: IPR007074: LicD	EMQU_0911	939692	940516	+	31.5152	223.353	133.012	52.774	0.595524	0.236281
	glycosyl transferase group 2 family protein	InterPro: IPR001173: Glycosyl transferase, family 2	EMQU_0912	940628	941089	+	33.5498	112.603	96.353	23.5598	0.855691	0.20923
	glycosyl transferase family protein		EMQU_0913	941086	941598	+	31.5789	272.001	26.234	87.7637	0.0964481	0.322659
	hypothetical protein		EMQU_0914	941609	943033	+	31.4386	90.0732	78.0967	42.358	0.867036	0.470263
	NAD-dependent epimerase/dehydratase	KO: K01784: UDP-glucose 4-epimerase [EC:5.1.3.2]; InterPro: IPR001509: NAD-dependent epimerase/dehydratase; IPR016040: NAD(P)-binding domain	EMQU_0915	943236	944195	+	36.9792	134.715	91.6614	146.365	0.680408	1.08648
	beta-lactamase	InterPro: IPR001466: Beta-lactamase-related; IPR012338: Beta-lactamase/transpeptidase-like	EMQU_0916	944307	945461	-	35.8442	98.9219	148.339	186.765	1.49956	1.888
	hypothetical protein	KO: K07082; InterPro: IPR003770: Uncharacterised protein family UPF0755, YceG-like	EMQU_0917	945678	946853	+	36.3095	143.046	132.045	67.7344	0.923097	0.473516
greA	elongation factor GreA	KO: K03624; InterPro: IPR001437: Transcription elongation factor, GreA/GreB, C-terminal; IPR006359: Transcription elongation factor GreA; IPR018151: Transcription elongation factor, GreA/GreB, conserved site; IPR022691: Transcription elongation factor, GreA/GreB, N-terminal; IPR023459: Transcription elongation factor GreA/GreB	EMQU_0918	946993	947472	+	38.75	143.831	108.915	356.636	0.757243	2.47955
	hypothetical protein	InterPro: IPR016975: Cell wall-active antibiotic response protein; IPR024425: Domain of unknown function DUF2154	EMQU_0919	947653	948384	+	35.3825	89.0021	50.9132	71.645	0.572045	0.804981
	sensor histidine kinase	KO: K11617: two-component system, NarL family, sensor histidine kinase LiaS [EC:2.7.13.3]; InterPro: IPR003594: ATPase-like, ATP-binding domain; IPR005467: Signal transduction histidine kinase, core; IPR011712: Signal transduction histidine kinase, subgroup 3, dimerisation and phosphoacceptor domain; IPR017202: Signal transduction histidine kinase, LiaS	EMQU_0920	948381	949454	+	34.6369	64.7349	14.9405	38.2353	0.230796	0.590645
	luxR family response regulator	KO: K11618: two-component system, NarL family, response regulator LiaR; InterPro: IPR000792: Transcription regulator LuxR, C-terminal; IPR001789: Signal transduction response regulator, receiver domain; IPR011006: CheY-like superfamily; IPR011991: Winged helix-turn-helix transcription repressor DNA-binding; IPR016032: Signal transduction response regulator, C-terminal effector	EMQU_0921	949451	950083	+	39.8104	115.979	112.028	72.6892	0.965931	0.626744
	hypothetical protein	InterPro: IPR002508: Cell wall hydrolase/autolysin, catalytic; IPR003343: Bacterial Ig-like, group 2; IPR006637: Clostridial hydrophobic; IPR008964: Invasin/intimin cell-adhesion	EMQU_0922	950373	953453	+	37.3255	452.894	312.822	489.296	0.690717	1.08038
	magnesium transporter	KO: K06213; InterPro: IPR000644: Cystathionine beta-synthase, core; IPR006667: MgtE magnesium transporter, integral membrane; IPR006668: Magnesium transporter, MgtE intracellular domain; IPR006669: Divalent cation transporter; IPR013785: Aldolase-type TIM barrel	EMQU_0923	953858	955249	+	38.9368	94.6535	94.4503	67.8868	0.997854	0.717214
	potassium uptake protein	KO: K03499; InterPro: IPR003148: Regulator of K+ conductance, N-terminal; IPR006037: Regulator of K+ conductance, C-terminal; IPR016040: NAD(P)-binding domain	EMQU_0924	955436	956101	+	38.7387	179.584	282.902	127.032	1.57532	0.707368
	hypothetical protein	InterPro: IPR000361: FeS cluster biogenesis; IPR008326: Uncharacterised conserved protein UCP034852	EMQU_0925	956117	956419	+	36.3036	288.826	105.915	70.2129	0.366709	0.243097
serA	phosphoglycerate dehydrogenase	InterPro: IPR006139: D-isomer specific 2-hydroxyacid dehydrogenase, catalytic domain; IPR006140: D-isomer specific 2-hydroxyacid dehydrogenase, NAD-binding; IPR016040: NAD(P)-binding domain	EMQU_0926	956627	957583	+	36.7816	296.693	329.934	277.622	1.11204	0.93572
	hypothetical protein	InterPro: IPR009574: Protein of unknown function DUF1189	EMQU_0927	957639	958445	-	35.0682	36.148	0	4.90464	0	0.135682
gtrA	teichoic acid glycosylation protein GtrA	InterPro: IPR007267: GtrA-like protein	EMQU_0928	958634	959107	+	33.3333	28.7201	112.478	0	3.91635	0
	superoxide dismutase	KO: K04564: superoxide dismutase, Fe-Mn family [EC:1.15.1.1]; InterPro: IPR001189: Manganese/iron superoxide dismutase; IPR019831: Manganese/iron superoxide dismutase, N-terminal; IPR019832: Manganese/iron superoxide dismutase, C-terminal; IPR019833: Manganese/iron superoxide dismutase, binding site	EMQU_0929	959189	959791	+	39.9668	1495.66	2461.04	1285.71	1.64546	0.859626
cspA	cold shock protein Csp	KO: K03704; InterPro: IPR002059: Cold-shock protein, DNA-binding; IPR011129: Cold shock protein; IPR012156: Cold shock, CspA; IPR012340: Nucleic acid-binding, OB-fold; IPR016027: Nucleic acid-binding, OB-fold-like; IPR019844: Cold-shock conserved site	EMQU_0930	959920	960120	+	40.796	3485.57	3033.6	2948.84	0.870329	0.846014
	hypothetical protein	InterPro: IPR007737: M trans-acting positive regulator	EMQU_0931	960335	961675	-	32.6622	47.8577	42.0733	26.1951	0.879134	0.547355
	cell wall-associated protease	InterPro: IPR019931: LPXTG-motif cell wall anchor	EMQU_0932	962183	964624	+	49.7543	231.548	332.572	95.0207	1.4363	0.410372
	hypothetical protein		EMQU_0933	964704	965003	+	33.3333	16.2063	220.85	1.64919	13.6274	0.101762
	hypothetical protein	InterPro: IPR008928: Six-hairpin glycosidase-like	EMQU_0934	965153	966376	+	34.8856	55.2128	109.106	27.8906	1.97609	0.505148
	conserved hypothetical protein		EMQU_0935	966382	966621	+	39.1667	109.393	155.285	218.517	1.41952	1.99755
	hypothetical protein	InterPro: IPR004101: Mur ligase, C-terminal; IPR005863: UDP-MurNAc-pentapeptide synthetase; IPR013221: Mur ligase, central	EMQU_0936	966639	968111	+	36.7957	81.5269	135.29	95.7267	1.65946	1.17417
	lytR family transcriptional regulator	InterPro: IPR004474: Cell envelope-related transcriptional attenuator	EMQU_0937	968526	969740	+	40.7407	396.155	191.71	177.949	0.483927	0.449191
	chitinase B	InterPro: IPR003610: Carbohydrate-binding module family 5/12; IPR003961: Fibronectin, type III; IPR013783: Immunoglobulin-like fold; IPR017853: Glycoside hydrolase, superfamily	EMQU_0938	970139	971902	+	42.0635	91.5052	17.0192	55.2533	0.185991	0.603827
	chitinase B	KO: K13381: bifunctional chitinase/lysozyme [EC:3.2.1.14 3.2.1.17]; InterPro: IPR003610: Carbohydrate-binding module family 5/12; IPR003961: Fibronectin, type III; IPR013781: Glycoside hydrolase, subgroup, catalytic domain; IPR013783: Immunoglobulin-like fold; IPR017853: Glycoside hydrolase, superfamily	EMQU_0939	972865	974415	+	41.2637	49.2146	19.0227	90.9126	0.386525	1.84727
	chitin binding protein	KO: K03933; InterPro: IPR004302: Chitin-binding, domain 3; IPR014756: Immunoglobulin E-set	EMQU_0940	974780	975358	+	36.2694	104.963	219.026	138.429	2.08669	1.31883
	GTPase domain-containing protein	InterPro: IPR021147: Protein of unknown function DUF697	EMQU_0941	975573	976289	+	37.099	183.084	240.4	76.594	1.31305	0.418354
trmA	trmA family tRNA (uracil-5-)-methyltransferase	KO: K00599: [EC:2.1.1.-]; InterPro: IPR001566: 23S rRNA methyltransferase/RumA; IPR002792: Deoxyribonuclease/rho motif-related TRAM; ; IPR016027: Nucleic acid-binding, OB-fold-like	EMQU_0942	976405	977781	-	42.0479	164.182	198.852	85.5134	1.21117	0.520845
recX	recombination regulator RecX	KO: K03565; InterPro: IPR003783: Regulatory protein RecX	EMQU_0943	978012	978686	+	36.2963	215.364	292.166	172.248	1.35661	0.7998
	A/G-specific adenine glycosylase	KO: K03575: A/G-specific adenine glycosylase [EC:3.2.2.-]; InterPro: IPR000086: NUDIX hydrolase domain; IPR000445: Helix-hairpin-helix motif; IPR003265: HhH-GPD domain; IPR003651: Endonuclease III-like, iron-sulphur cluster loop motif; IPR004035: Endonuclease III, iron-sulphur binding site; IPR005760: A/G-specific adenine glycosylase MutY, bacterial form; IPR011257: DNA glycosylase; IPR015797: NU…	EMQU_0944	978679	979863	+	41.6878	251.096	206.61	88.5133	0.822834	0.352508
	hypothetical protein	KO: K07586; InterPro: IPR007295: Domain of unknown function DUF402; IPR016882: Uncharacterised protein family UPF0374	EMQU_0945	979956	980489	+	37.2659	649.164	556.39	391.913	0.857087	0.60372
	GNAT family acetyltransferase	InterPro: IPR000182: GCN5-related N-acetyltransferase (GNAT) domain; IPR016181: Acyl-CoA N-acyltransferase	EMQU_0946	980550	980984	-	42.5287	77.1199	32.128	9.09896	0.416598	0.117985
	permease	InterPro: IPR002549: Uncharacterised protein family UPF0118	EMQU_0947	981120	982244	+	37.3333	131.379	105.824	84.4383	0.805483	0.642706
	hemolysin	KO: K03699; InterPro: IPR000644: Cystathionine beta-synthase, core; IPR002550: Domain of unknown function DUF21; IPR005170: Transporter-associated domain; IPR016169: CO dehydrogenase flavoprotein-like, FAD-binding, subdomain 2	EMQU_0948	982371	983747	+	37.9085	202.315	176.674	54.6136	0.873264	0.269944
prfC	peptide chain release factor 3	KO: K02837; InterPro: IPR000795: Protein synthesis factor, GTP-binding; IPR004161: Translation elongation factor EFTu/EF1A, domain 2; IPR004548: Peptide chain release factor 3; IPR005225: Small GTP-binding protein domain; IPR009000: Translation elongation/initiation factor/Ribosomal, beta-barrel; IPR009022: Elongation factor G/III/V	EMQU_0949	983993	985573	+	39.9747	137.154	126.049	86.371	0.919027	0.629736
	hypothetical protein		EMQU_0950	985818	986039	+	38.7387	54.7512	23.3161	75.7734	0.425856	1.38396
	hypothetical protein	InterPro: IPR014959: Protein of unknown function DUF1827	EMQU_0951	986058	986378	-	36.1371	604.33	387.004	274.351	0.640384	0.453975
	ATP-binding subunit of chaperone	KO: K03697; InterPro: IPR001270: Chaperonin ClpA/B; IPR001943: UvrB/UvrC protein; IPR003593: ATPase, AAA+ type, core; IPR003959: ATPase, AAA-type, core; IPR009055: UvrB, C-terminal UvrC-binding; IPR013093: ATPase, AAA-2; IPR018368: Chaperonin ClpA/B, conserved site; IPR019489: Clp ATPase, C-terminal	EMQU_0952	986574	988415	-	40.0109	1203.6	1780.47	964.264	1.47929	0.80115
	ATP-dependent Clp protease, ATP-binding proteinClpE		EMQU_0953	988499	988672	-	44.8276	1469.75	1770.01	872.931	1.2043	0.593933
ptsH	PTS system transporter protein HPr	KO: K11189; InterPro: IPR000032: Phosphotransferase system, phosphocarrier HPr protein-like; IPR001020: Phosphotransferase system, HPr histidine phosphorylation site; IPR002114: Phosphotransferase system, HPr serine phosphorylation site; IPR005698: Phosphotransferase system, phosphocarrier HPr protein	EMQU_0954	989353	989619	+	38.9513	7039.75	4088.6	6796.87	0.580787	0.965499
	phosphoenolpyruvate-protein phosphotransferase	KO: K08483: phosphotransferase system, enzyme I, PtsI [EC:2.7.3.9]; InterPro: IPR000121: PEP-utilising enzyme, C-terminal; IPR006318: Phosphoenolpyruvate-utilising enzyme; IPR008279: PEP-utilising enzyme, mobile domain; IPR008731: Phosphotransferase system, PEP-utilising enzyme, N-terminal; IPR015813: Pyruvate/Phosphoenolpyruvate kinase; IPR018274: PEP-utilising enzyme, active site; IPR023151: PE…	EMQU_0955	989619	991346	+	40.7407	7147.68	4834.09	6698.96	0.676317	0.937222
	putative glycosyl transferase, group 1	InterPro: IPR001296: Glycosyl transferase, family 1	EMQU_0956	991511	992551	+	35.1585	178.877	74.5846	151.611	0.41696	0.847572
	glycoside hydrolase family protein	KO: K03429: 1,2-diacylglycerol 3-glucosyltransferase [EC:2.4.1.157]; InterPro: IPR001296: Glycosyl transferase, family 1	EMQU_0957	992575	993798	+	38.2353	297.116	193.684	113.584	0.651878	0.382287
glxR	2-hydroxy-3-oxopropionate reductase	KO: K00020: 3-hydroxyisobutyrate dehydrogenase [EC:1.1.1.31]; InterPro: IPR006115: 6-phosphogluconate dehydrogenase, NADP-binding; IPR008927: 6-phosphogluconate dehydrogenase, C-terminal-like; IPR013328: Dehydrogenase, multihelical; IPR015815: 3-hydroxyacid dehydrogenase/reductase; IPR016040: NAD(P)-binding domain	EMQU_0958	993886	994773	+	41.6667	246.928	286.788	303.094	1.16142	1.22746
	hypothetical protein	InterPro: IPR014904: Protein of unknown function DUF1797	EMQU_0959	994859	995089	+	38.5281	370.431	105.316	349.113	0.284307	0.942452
uvrC	excision endonuclease subunit UvrC	InterPro: IPR000305: Excinuclease ABC, C subunit, N-terminal; IPR004791: Excinuclease ABC, C subunit	EMQU_0960	995120	996076	-	36.5726	28.45	16.2262	35.6721	0.570342	1.25385
	marR family transcriptional regulator	InterPro: IPR000835: Transcription regulator HTH, MarR-type; IPR011991: Winged helix-turn-helix transcription repressor DNA-binding	EMQU_0961	996386	996826	+	40.1361	2019.73	1747.69	1648.06	0.86531	0.815982
fabH	beta-ketoacyl-acyl-carrier-protein synthase III	KO: K00648: 3-oxoacyl-[acyl-carrier-protein] synthase III [EC:2.3.1.180]; InterPro: IPR004655: Beta-ketoacyl-acyl carrier protein synthase III (FabH); IPR013747: 3-Oxoacyl-[acyl-carrier-protein (ACP)] synthase III C-terminal; IPR013751: 3-Oxoacyl-[acyl-carrier-protein (ACP)] synthase III; IPR016038: Thiolase-like, subgroup; IPR016039: Thiolase-like	EMQU_0962	996836	997798	+	41.6407	1583.78	1381.39	1762.21	0.87221	1.11266
acpP_2	acyl carrier protein	KO: K02078; InterPro: IPR003231: Acyl carrier protein (ACP); IPR006163: Phosphopantetheine-binding; IPR009081: Acyl carrier protein-like	EMQU_0963	997853	998077	+	33.7778	1331.08	1012.23	1306.16	0.760456	0.981274
	acyl-carrier-protein S-malonyltransferase	KO: K00645: [acyl-carrier-protein] S-malonyltransferase [EC:2.3.1.39]; InterPro: IPR001227: Acyl transferase domain; IPR004410: Malonyl CoA-acyl carrier protein transacylase, FabD-type; IPR014043: Acyl transferase; IPR016035: Acyl transferase/acyl hydrolase/lysophospholipase; IPR016036: Malonyl-CoA ACP transacylase, ACP-binding; IPR020801: Polyketide synthase, acyl transferase domain	EMQU_0964	998187	999107	+	43.1053	1314.46	1915.91	1741.58	1.45757	1.32495
fabG	3-oxoacyl-ACP reductase	KO: K00059: 3-oxoacyl-[acyl-carrier protein] reductase [EC:1.1.1.100]; InterPro: IPR002198: Short-chain dehydrogenase/reductase SDR; IPR002347: Glucose/ribitol dehydrogenase; IPR011284: 3-oxoacyl-(acyl-carrier-protein) reductase; IPR016040: NAD(P)-binding domain; IPR020842: Polyketide synthase/Fatty acid synthase, KR; IPR020904: Short-chain dehydrogenase/reductase, conserved site	EMQU_0965	999118	999855	+	41.1924	1897.99	1972.28	1922.04	1.03914	1.01267
	3-oxoacyl-(acyl carrier protein) synthase II	KO: K09458: 3-oxoacyl-[acyl-carrier-protein] synthase II [EC:2.3.1.179]; InterPro: IPR000794: Beta-ketoacyl synthase; IPR014030: Beta-ketoacyl synthase, N-terminal; IPR014031: Beta-ketoacyl synthase, C-terminal; IPR016038: Thiolase-like, subgroup; IPR016039: Thiolase-like; IPR017568: 3-oxoacyl-[acyl-carrier-protein] synthase 2; IPR018201: Beta-ketoacyl synthase, active site; IPR020841: Polyketide…	EMQU_0966	999868	1001103	+	43.6893	2915.57	3404.72	2835.24	1.16777	0.972448	PTS system transporter protein HPr
	acetyl-CoA carboxylase, biotin carboxyl carrierprotein	KO: K02160: acetyl-CoA carboxylase biotin carboxyl carrier protein; InterPro: IPR000089: Biotin/lipoyl attachment; IPR001249: Acetyl-CoA biotin carboxyl carrier; IPR001882: Biotin-binding site; IPR011053: Single hybrid motif	EMQU_0967	1001103	1001585	+	38.9234	3006.73	3695.12	3551.38	1.22895	1.18114
fabZ	(3R)-hydroxymyristoyl-ACP dehydratase	KO: K02372: 3-hydroxyacyl-[acyl-carrier-protein] dehydratase [EC:4.2.1.59]; InterPro: IPR010084: Beta-hydroxyacyl-(acyl-carrier-protein) dehydratase FabZ; IPR013114: Beta-hydroxyacyl-(acyl-carrier-protein) dehydratase, FabA/FabZ	EMQU_0968	1001605	1002024	+	40.2381	2928.72	3169.79	2385.43	1.08231	0.814496
accC	biotin carboxylase	KO: K01961: acetyl-CoA carboxylase, biotin carboxylase subunit [EC:6.4.1.2 6.3.4.14]; InterPro: IPR004549: Acetyl-CoA carboxylase, biotin carboxylase; IPR005479: Carbamoyl-phosphate synthetase, large subunit, ATP-binding; IPR005481: Carbamoyl-phosphate synthase, large subunit, N-terminal; IPR005482: Biotin carboxylase, C-terminal; IPR011054: Rudiment single hybrid motif; IPR011761: ATP-grasp fold…	EMQU_0969	1002032	1003411	+	43.0435	3257.12	3544.55	3328.85	1.08825	1.02202
accD	acetyl-CoA carboxylase subunit beta	KO: K01963: acetyl-CoA carboxylase carboxyl transferase subunit beta [EC:6.4.1.2]; InterPro: IPR000022: Carboxyl transferase; IPR000438: Acetyl-CoA carboxylase carboxyl transferase, beta subunit; IPR011762: Acetyl-coenzyme A carboxyltransferase, N-terminal	EMQU_0970	1003413	1004282	+	41.7241	3045.68	3199.71	2729.69	1.05057	0.89625
	acetyl-CoA carboxylase subunit alpha	KO: K01962: acetyl-CoA carboxylase carboxyl transferase subunit alpha [EC:6.4.1.2]; InterPro: IPR001095: Acetyl-CoA carboxylase, alpha subunit; IPR011763: Acetyl-coenzyme A carboxyltransferase, C-terminal	EMQU_0971	1004275	1005060	+	43.7659	2495.9	2644.06	2305.08	1.05936	0.923548
	predicted protein		EMQU_0972	1005831	1006163	-	31.2312	13.1403	0	20.8005	0	1.58296
	hypothetical protein		EMQU_0973	1006398	1006571	-	32.7586	47.5014	0	22.7474	0	0.478879
	lipoprotein, putative		EMQU_0974	1006760	1007215	+	37.2807	56.509	1.13513	32.5497	0.0200875	0.57601
	hypothetical protein		EMQU_0975	1007680	1008273	+	33.165	67.1172	20.9138	39.1473	0.311602	0.583268
	hypothetical protein	InterPro: IPR014942: Protein of unknown function DUF1814	EMQU_0976	1008286	1009143	+	30.6527	23.7995	27.1478	26.5254	1.14068	1.11453
	amino acid transporter amino acid-binding protein	KO: K02030; InterPro: IPR001320: Ionotropic glutamate receptor; IPR001638: Extracellular solute-binding protein, family 3	EMQU_0977	1009471	1010289	+	40.1709	144.848	92.9057	169.751	0.641401	1.17193
	polar amino acid ABC transporter permease	KO: K02029; InterPro: IPR000515: Binding-protein-dependent transport systems inner membrane component; IPR010065: Amino acid ABC transporter, permease protein, 3-TM domain, His/Glu/Gln/Arg/opine family	EMQU_0978	1010301	1010990	+	41.7391	138.106	145.533	65.2504	1.05378	0.472465
	phosphate ABC transporter ATP-binding protein	KO: K02028; InterPro: IPR003439: ABC transporter-like; IPR003593: ATPase, AAA+ type, core; IPR017871: ABC transporter, conserved site	EMQU_0979	1011004	1011738	+	43.5374	102.53	128.876	20.1941	1.25696	0.196958
yqeG	HAD superfamily hydrolase	KO: K07015; InterPro: IPR005834: Haloacid dehalogenase-like hydrolase; IPR006439: HAD-superfamily hydrolase, subfamily IA, variant 1; IPR006549: HAD-superfamily hydrolase, subfamily IIIA; IPR010021: HAD-superfamily phosphatase, subfamily IIIA; IPR023214: HAD-like domain	EMQU_0980	1012054	1012581	+	39.3939	94.844	106.857	57.1593	1.12666	0.602667
	GTPase YqeH	KO: K06948; InterPro: IPR006073: GTP binding domain; IPR019988: GTP-binding protein, riobosome biogenesis, YqeH	EMQU_0981	1012578	1013687	+	40.8108	280.764	277.462	133.718	0.988237	0.476264
	RNA-binding protein	KO: K07574; InterPro: IPR001890: RNA-binding, CRM domain; IPR017924: RNA-binding protein YhbY	EMQU_0982	1013703	1014014	+	38.4615	179.205	355.032	136.375	1.98115	0.761001
	nicotinic acid mononucleotide adenylyltransferase	KO: K00969: nicotinate-nucleotide adenylyltransferase [EC:2.7.7.18]; InterPro: IPR004820: Cytidylyltransferase; IPR004821: Cytidyltransferase-related; IPR005248: Probable nicotinate-nucleotide adenylyltransferase; IPR014729: Rossmann-like alpha/beta/alpha sandwich fold	EMQU_0983	1014027	1014674	+	41.358	317.374	837.933	389.391	2.6402	1.22691
	HD domain-containing protein	InterPro: IPR003607: Metal-dependent phosphohydrolase, HD domain; IPR005249: Conserved hypothetical protein CHP00488; IPR006674: Metal-dependent phosphohydrolase, HD subdomain; IPR023279: HD domain	EMQU_0984	1014664	1015248	+	40.5128	265.119	754.748	241.881	2.84682	0.912347
	iojap-related protein	KO: K09710; InterPro: IPR004394: Ribosome-associated, Iojap-like	EMQU_0985	1015360	1015626	+	40.0749	396.965	887.898	340.955	2.23672	0.858906
	SAM-dependent methyltransferase		EMQU_0986	1015628	1016389	+	40.1575	360.496	295.49	363.6	0.819678	1.00861
	nucleotidyltransferase	InterPro: IPR008513: Uncharacterised protein family UPF0348; IPR014729: Rossmann-like alpha/beta/alpha sandwich fold	EMQU_0987	1016467	1017666	+	41.75	145.452	58.232	136.058	0.400352	0.935414
	hypothetical protein	InterPro: IPR002876: Protein of unknown function DUF28; IPR017856: Integrase, N-terminal zinc-binding domain-like	EMQU_0988	1017683	1018465	+	41.1239	493.642	343.756	276.128	0.696368	0.559369
	hypothetical protein		EMQU_0989	1018946	1019584	+	37.0892	154.455	74.5239	73.5552	0.482497	0.476225
	ATP-dependent DNA helicase	KO: K03657: DNA helicase II / ATP-dependent DNA helicase PcrA [EC:3.6.4.12]; InterPro: IPR000212: DNA helicase, UvrD/REP type; IPR014016: Helicase, superfamily 1, UvrD-related	EMQU_0990	1019784	1022066	-	39.4656	95.1937	87.5166	115.941	0.919353	1.21795
	cadmium-translocating P-type ATPase	KO: K01552; InterPro: IPR000695: ATPase, P-type, H+ transporting proton pump; IPR001757: ATPase, P-type, K/Mg/Cd/Cu/Zn/Na/Ca/Na/H-transporter; IPR005834: Haloacid dehalogenase-like hydrolase; IPR006404: ATPase, P-type, heavy metal-(Cd/Co/Hg/Pb/Zn)-translocating; IPR006416: ATPase, P-type, heavy metal translocating; IPR008250: ATPase, P-type, ATPase-associated domain; IPR018303: ATPase, P-type pho…	EMQU_0991	1022263	1024074	+	45.0331	636.448	941.538	713.464	1.47936	1.12101
	4-oxalocrotonate tautomerase	KO: K01821: 4-oxalocrotonate tautomerase [EC:5.3.2.-]; InterPro: IPR004370: 4-oxalocrotonate tautomerase; IPR014347: Tautomerase; IPR018191: 4-oxalocrotonate tautomerase, bacteria/archaea	EMQU_0992	1024185	1024364	+	37.2222	513.201	960.468	524.991	1.87152	1.02297
	threonyl-tRNA synthetase	KO: K01868: threonyl-tRNA synthetase [EC:6.1.1.3]; InterPro: IPR002314: Aminoacyl-tRNA synthetase, class II (G/ H/ P/ S), conserved domain; IPR002320: Threonyl-tRNA synthetase, class IIa; IPR004095: TGS; IPR004154: Anticodon-binding; IPR006195: Aminoacyl-tRNA synthetase, class II; IPR012675: Beta-grasp fold, ferredoxin-type; IPR012676: TGS-like; IPR012947: Threonyl/alanyl tRNA synthetase, SAD; IP…	EMQU_0993	1024689	1026623	+	42.2222	376.138	277.935	166.453	0.738918	0.442531
	Helix-turn-helix, AraC domain-containing protein	InterPro: IPR012287: Homeodomain-related; IPR018060: Helix-turn-helix, AraC type, DNA binding	EMQU_0994	1026783	1027586	+	38.4328	58.0526	76.6125	41.2297	1.31971	0.710212
	glyoxalase family protein		EMQU_0995	1027629	1028033	+	37.284	51.6202	5.11227	14.6594	0.0990362	0.283986
	sialic acid utilization regulator, RpiR family protein	InterPro: IPR000281: Helix-turn-helix protein RpiR; IPR001347: Sugar isomerase (SIS); IPR011991: Winged helix-turn-helix transcription repressor DNA-binding	EMQU_0996	1028313	1029158	+	37.7069	152.868	84.434	143.865	0.552332	0.941105
	penicillin-binding protein 2B	KO: K00687: penicillin-binding protein 2B [EC:2.3.2.-]; InterPro: IPR001460: Penicillin-binding protein, transpeptidase; IPR005311: Penicillin-binding protein, dimerisation domain; IPR012338: Beta-lactamase/transpeptidase-like	EMQU_0997	1029416	1031569	+	40.9006	441.95	413.085	328.229	0.934686	0.742684
	HAD superfamily hydrolase	KO: K07024; InterPro: IPR000150: Cof protein; IPR006379: HAD-superfamily hydrolase, subfamily IIB; IPR013200: HAD superfamily hydrolase-like, type 3; IPR023214: HAD-like domain	EMQU_0998	1031724	1032542	-	39.1941	79.5477	34.1286	98.4679	0.429034	1.23785
	xanthine/uracil permeases family protein	KO: K06901; InterPro: IPR006043: Xanthine/uracil/vitamin C permease	EMQU_0999	1032826	1034262	+	40.1531	158.68	11.1664	26.8552	0.0703706	0.169241
pmrA	MFS family major facilitator multidrug:cation transporter	InterPro: IPR001958: Tetracycline resistance protein, TetA/multidrug resistance protein MdtG; IPR005828: General substrate transporter; IPR011701: Major facilitator superfamily; IPR016196: Major facilitator superfamily domain, general substrate transporter; IPR020846: Major facilitator superfamily domain	EMQU_1000	1034418	1035614	+	40.1838	143.786	163.458	71.9194	1.13682	0.500185
	hypothetical protein	InterPro: IPR021324: Protein of unknown function DUF2929	EMQU_1001	1035660	1035854	-	39.4872	356.54	273.408	12.686	0.766838	0.035581
dnaE	DNA-directed DNA polymerase III subunit alpha	KO: K02337: DNA polymerase III subunit alpha [EC:2.7.7.7]; InterPro: IPR003141: Polymerase/histidinol phosphatase, N-terminal; IPR004013: PHP, C-terminal; IPR004365: Nucleic acid binding, OB-fold, tRNA/helicase-type; IPR004805: DNA polymerase III, alpha subunit; IPR011708: Bacterial DNA polymerase III, alpha subunit; IPR016195: Polymerase/histidinol phosphatase-like	EMQU_1002	1036078	1039392	+	39.3363	191.25	171.446	116.562	0.896452	0.609478
pfkA	6-phosphofructokinase	KO: K00850: 6-phosphofructokinase 1 [EC:2.7.1.11]; InterPro: IPR000023: Phosphofructokinase domain; IPR012003: ATP-dependent phosphofructokinase, prokaryotic; IPR012828: 6-phosphofructokinase; IPR022953: Phosphofructokinase	EMQU_1003	1039553	1040521	+	42.8277	1493.19	2038.42	1031.38	1.36514	0.690721
pyk	pyruvate kinase	KO: K00873: pyruvate kinase [EC:2.7.1.40]; InterPro: IPR001697: Pyruvate kinase; IPR008279: PEP-utilising enzyme, mobile domain; IPR011037: Pyruvate kinase-like, insert domain; IPR015793: Pyruvate kinase, barrel; IPR015794: Pyruvate kinase, alpha/beta; IPR015795: Pyruvate kinase, C-terminal; IPR015806: Pyruvate kinase, beta-barrel insert domain; IPR015813: Pyruvate/Phosphoenolpyruvate kinase	EMQU_1004	1040650	1042434	+	40.3361	2524.92	2659.71	1722.08	1.05338	0.682034
	malolactic regulator	InterPro: IPR000847: Transcription regulator HTH, LysR; IPR005119: LysR, substrate-binding; IPR011991: Winged helix-turn-helix transcription repressor DNA-binding	EMQU_1005	1042515	1043405	-	38.7205	103.131	19.752	74.4077	0.191522	0.721485
	malate permease	KO: K07088; InterPro: IPR004776: Auxin efflux carrier	EMQU_1006	1043640	1044605	+	38.4058	162.063	33.2218	56.3387	0.204993	0.347633
	nucleic acid-binding protein	KO: K07040; InterPro: IPR003772: Protein of unknown function DUF177	EMQU_1007	1044781	1045350	+	41.2281	436.718	546.677	205.714	1.25178	0.471045
rpmF	50S ribosomal protein L32	KO: K02911: large subunit ribosomal protein L32; InterPro: IPR002677: Ribosomal protein L32p; IPR011332: Ribosomal protein, zinc-binding domain	EMQU_1008	1045408	1045587	+	37.7778	1223.58	448.602	1278.12	0.366631	1.04457
gnd	phosphogluconate dehydrogenase	KO: K00033: 6-phosphogluconate dehydrogenase [EC:1.1.1.44]; InterPro: IPR006113: 6-phosphogluconate dehydrogenase, decarboxylating; IPR006114: 6-phosphogluconate dehydrogenase, C-terminal; IPR006115: 6-phosphogluconate dehydrogenase, NADP-binding; IPR006184: 6-phosphogluconate-binding site; IPR008927: 6-phosphogluconate dehydrogenase, C-terminal-like; IPR012284: Fibritin/6-phosphogluconate dehydr…	EMQU_1009	1045793	1047214	+	41.2096	603.806	788.074	691.684	1.30518	1.14554
	response regulator	InterPro: IPR001789: Signal transduction response regulator, receiver domain; IPR001867: Signal transduction response regulator, C-terminal; IPR011006: CheY-like superfamily; IPR011991: Winged helix-turn-helix transcription repressor DNA-binding; IPR016032: Signal transduction response regulator, C-terminal effector	EMQU_1010	1047402	1048088	+	39.4469	762.194	1176.13	1034.16	1.54308	1.35682
	sensor histidine kinase	InterPro: IPR003594: ATPase-like, ATP-binding domain; IPR003660: HAMP linker domain; IPR003661: Signal transduction histidine kinase, subgroup 1, dimerisation/phosphoacceptor domain; IPR004358: Signal transduction histidine kinase-related protein, C-terminal; IPR005467: Signal transduction histidine kinase, core; IPR009082: Signal transduction histidine kinase, homodimeric	EMQU_1011	1048085	1049587	+	36.3273	569.972	795.884	556.312	1.39636	0.976035
	conserved domain protein		EMQU_1012	1052915	1053106	+	48.4375	0	0	0	#DIV/0!	#DIV/0!
	hypothetical protein HMPREF0357_10597		EMQU_1013	1054353	1054514	+	54.321	0	0	0	#DIV/0!	#DIV/0!
	hypothetical protein	InterPro: IPR007737: M trans-acting positive regulator; IPR011991: Winged helix-turn-helix transcription repressor DNA-binding; IPR013196: Helix-turn-helix, type 11	EMQU_1014	1056863	1058293	-	35.7792	32.9563	25.3202	0.691483	0.768296	0.0209818
	hypothetical protein		EMQU_1015	1058890	1059105	+	33.7963	99.0388	31.1529	132.851	0.314552	1.3414
	hypothetical protein		EMQU_1016	1059299	1059745	+	42.5056	98.9784	2.31596	67.517	0.0233987	0.682139
	hypothetical protein MPTP_0399	InterPro: IPR012480: Heparinase II/III-like	EMQU_1017	1059749	1061422	+	39.546	132.149	14.5329	49.3574	0.109974	0.373499
	lacI family transcriptional regulator	KO: K02529; InterPro: IPR000843: Transcription regulator HTH, LacI; IPR001761: Periplasmic binding protein/LacI transcriptional regulator; IPR010982: Lambda repressor-like, DNA-binding	EMQU_1018	1061604	1062659	-	39.4886	108.196	43.6249	39.8241	0.403204	0.368074
	lipoprotein		EMQU_1019	1062991	1063296	+	35.6209	81.0317	15.224	56.5897	0.187877	0.698365
	hypothetical protein	InterPro: IPR016624: Uncharacterised conserved protein UCP014753	EMQU_1020	1063205	1064992	+	40.9396	113.934	53.2671	132.82	0.467526	1.16577
	glucuronyl hydrolase	InterPro: IPR008928: Six-hairpin glycosidase-like; IPR010905: Glycosyl hydrolase, family 88; IPR012341: Six-hairpin glycosidase	EMQU_1021	1065004	1066137	+	40.4762	101.183	63.4469	125.216	0.627054	1.23753
	sugar ABC transporter sugar-binding protein	KO: K02027; InterPro: IPR006059: Bacterial extracellular solute-binding, family 1	EMQU_1022	1066173	1067438	+	39.9684	99.0815	30.2557	91.4478	0.305362	0.922955
	ABC transporter permease	InterPro: IPR000515: Binding-protein-dependent transport systems inner membrane component	EMQU_1023	1067658	1068554	+	39.6878	104.61	25.9674	118.035	0.248232	1.12834
	sugar ABC transporter ATP-binding protein	KO: K02026; InterPro: IPR000515: Binding-protein-dependent transport systems inner membrane component	EMQU_1024	1068568	1069404	+	36.0812	66.8004	29.0657	80.3904	0.435113	1.20344
	hypothetical protein		EMQU_1025	1069711	1069899	-	33.3333	43.7314	8.21615	0	0.187877	0
	MFS family major facilitator transporter	KO: K08217; InterPro: IPR011701: Major facilitator superfamily; IPR016196: Major facilitator superfamily domain, general substrate transporter	EMQU_1026	1070221	1071441	-	38.9844	67.2942	40.6972	19.4499	0.604765	0.289027
	membrane protein		EMQU_1027	1071906	1072160	+	34.902	72.4519	22.3286	71.7881	0.308185	0.990838
	hypothetical protein		EMQU_1028	1072672	1072992	+	32.3988	25.7484	9.67509	21.5781	0.375755	0.838038
	hypothetical protein		EMQU_1029	1072989	1073123	+	26.6667	39.6155	0	51.308	0	1.29515
	hypothetical protein		EMQU_1030	1073162	1074235	+	39.1993	109.099	25.5435	63.572	0.234132	0.582702
	hypothetical protein		EMQU_1031	1074245	1074550	+	37.5817	33.366	1.69156	11.3179	0.0506971	0.339206
	hypothetical protein		EMQU_1032	1074923	1075186	+	34.0909	108.656	90.1909	172.415	0.830058	1.58679
	hydrolase	KO: K06999; InterPro: IPR003140: Phospholipase/carboxylesterase/thioesterase	EMQU_1033	1075394	1075996	-	38.9718	148.357	48.929	114.869	0.329807	0.774274
	lactoylglutatione lyase	KO: K15975; InterPro: IPR004360: Glyoxalase/fosfomycin resistance/dioxygenase	EMQU_1034	1076017	1076994	-	42.5358	105.391	139.725	23.2707	1.32578	0.220804
	gntR family transcriptional regulator	KO: K03492; InterPro: IPR000524: Transcription regulator HTH, GntR; IPR011663: UbiC transcription regulator-associated; IPR011991: Winged helix-turn-helix transcription repressor DNA-binding	EMQU_1035	1077246	1077968	-	39.0041	66.5738	35.7965	41.7429	0.537696	0.627017
	PTS system lactose/cellobiose-specific transporter subunit IIC	KO: K02761: PTS system, cellobiose-specific IIC component; InterPro: IPR003352: Phosphotransferase system, EIIC; IPR004501: Phosphotransferase system, lactose/cellobiose IIC component; IPR004796: Phosphotransferase system, cellobiose-specific IIC component	EMQU_1036	1078272	1079543	-	40.6447	31.3425	13.4288	9.33502	0.428452	0.297839
bglB	6-phospho-beta-glucosidase	KO: K01223: 6-phospho-beta-glucosidase [EC:3.2.1.86]; InterPro: IPR001360: Glycoside hydrolase, family 1; IPR013781: Glycoside hydrolase, subgroup, catalytic domain; IPR017853: Glycoside hydrolase, superfamily; IPR018120: Glycoside hydrolase, family 1, active site	EMQU_1037	1079697	1081094	+	40.4149	76.5107	21.1046	61.2251	0.275838	0.800217
uspA2	universal stress protein	InterPro: IPR006015: Universal stress protein A; IPR006016: UspA; IPR014729: Rossmann-like alpha/beta/alpha sandwich fold	EMQU_1038	1081290	1081730	+	36.7347	801.498	1725.39	1090.48	2.15271	1.36056
thiD	phosphomethylpyrimidine kinase	KO: K00941: hydroxymethylpyrimidine/phosphomethylpyrimidine kinase [EC:2.7.1.49 2.7.4.7]; InterPro: IPR004399: Phosphomethylpyrimidine kinase type-2; IPR013749: Phosphomethylpyrimidine kinase type-1	EMQU_1039	1081880	1082695	+	39.7059	68.5195	66.6052	29.1033	0.972062	0.424745
	cardiolipin synthetase	KO: K06131: cardiolipin synthase [EC:2.7.8.-]; InterPro: IPR001736: Phospholipase D/Transphosphatidylase; IPR015679: Phospholipase D	EMQU_1040	1082810	1084261	-	39.1185	159.72	87.339	128.119	0.546827	0.802147
	cation-transporting ATPase PacL	InterPro: IPR000695: ATPase, P-type, H+ transporting proton pump; IPR001757: ATPase, P-type, K/Mg/Cd/Cu/Zn/Na/Ca/Na/H-transporter; IPR004014: ATPase, P-type cation-transporter, N-terminal; IPR005834: Haloacid dehalogenase-like hydrolase; IPR006068: ATPase, P-type cation-transporter, C-terminal; IPR008250: ATPase, P-type, ATPase-associated domain; IPR018303: ATPase, P-type phosphorylation site; IP…	EMQU_1041	1084598	1087264	+	41.0949	255.583	128.871	140.06	0.504223	0.548004
	hypothetical protein		EMQU_1042	1087467	1088189	+	38.1743	87.4201	81.616	32.1626	0.933607	0.367908
	hydroxymethylglutaryl-CoA synthase	KO: K01641: hydroxymethylglutaryl-CoA synthase [EC:2.3.3.10]; InterPro: IPR013746: Hydroxymethylglutaryl-coenzyme A synthase C-terminal; IPR016038: Thiolase-like, subgroup; IPR016039: Thiolase-like	EMQU_1043	1088220	1089020	-	38.0774	186.95	93.0548	139.594	0.497753	0.746693
	hydroxymethylglutaryl-CoA synthase	InterPro: IPR013528: Hydroxymethylglutaryl-coenzyme A synthase, N-terminal; IPR016038: Thiolase-like, subgroup; IPR016039: Thiolase-like	EMQU_1044	1088975	1089376	-	39.0547	177.786	82.4067	50.4602	0.463516	0.283825
	acetyl-CoA acetyltransferase/hydroxymethylglutaryl-CoA reductase, degradative	KO: K00626: acetyl-CoA C-acetyltransferase [EC:2.3.1.9]; InterPro: IPR002155: Thiolase; IPR016038: Thiolase-like, subgroup; IPR016039: Thiolase-like; IPR020610: Thiolase, active site; IPR020613: Thiolase, conserved site; IPR020615: Thiolase, acyl-enzyme intermediate active site; IPR020616: Thiolase, N-terminal; IPR020617: Thiolase, C-terminal	EMQU_1045	1089832	1091031	+	42.75	320.481	395.977	187.183	1.23557	0.584069
	acetyl-CoA acetyltransferase	KO: K00054: hydroxymethylglutaryl-CoA reductase [EC:1.1.1.88]; InterPro: IPR002202: Hydroxymethylglutaryl-CoA reductase, class I/II; IPR004553: Hydroxymethylglutaryl-CoA reductase, bacterial-type; IPR009023: Hydroxymethylglutaryl-CoA reductase, class I/II, NAD/NADP-binding; IPR009029: Hydroxymethylglutaryl-CoA reductase, class I/II, substrate-binding; IPR023074: Hydroxymethylglutaryl-CoA reductas…	EMQU_1046	1091070	1092269	+	44.4167	368.289	966.65	248.203	2.6247	0.673934
ftsW3	ftsW/RodA/SpoVE family cell division protein	InterPro: IPR001182: Cell cycle protein; IPR018365: Cell cycle, FtsW / RodA / SpoVE, conserved site	EMQU_1047	1092913	1094058	+	36.2129	72.971	194.219	36.2648	2.6616	0.496976
	cell cycle protein FtsW	KO: K05837; InterPro: IPR001182: Cell cycle protein; IPR018365: Cell cycle, FtsW / RodA / SpoVE, conserved site	EMQU_1048	1094048	1095187	+	37.0175	113.444	173.901	134.973	1.53292	1.18977
	cell-envelope associated acid phosphatase	InterPro: IPR000326: Phosphatidic acid phosphatase type 2/haloperoxidase; IPR004474: Cell envelope-related transcriptional attenuator; IPR016118: Phosphatidic acid phosphatase/chloroperoxidase, N-terminal	EMQU_1049	1095208	1096809	+	38.4519	122.306	70.4373	56.2082	0.575909	0.459569
	hypothetical protein		EMQU_1050	1096932	1097672	-	37.112	142.38	30.0372	28.7105	0.210965	0.201648
	hypothetical protein		EMQU_1051	1097981	1098226	-	39.4309	401.206	679.636	68.3809	1.69398	0.170438
	dehydrogenase	KO: K05885; InterPro: IPR001395: Aldo/keto reductase; IPR018170: Aldo/keto reductase, conserved site; IPR020471: Aldo/keto reductase subgroup; IPR023210: NADP-dependent oxidoreductase domain	EMQU_1052	1098249	1099100	-	40.8451	334.399	857.835	256.088	2.56531	0.765818
	hypothetical protein	InterPro: IPR007358: Nucleoid-associated protein NdpA	EMQU_1053	1099260	1100264	+	37.7114	109.332	5.15042	33.9683	0.0471079	0.310688
	hypothetical protein	InterPro: IPR006542: Conserved hypothetical protein CHP01655	EMQU_1054	1100394	1100753	-	35.8333	89.1349	1.43783	35.7324	0.0161309	0.40088
	glycosyltransferase	KO: K00694: cellulose synthase (UDP-forming) [EC:2.4.1.12]; InterPro: IPR001173: Glycosyl transferase, family 2; IPR003919: Cellulose synthase, subunit A; IPR005150: Cellulose synthase	EMQU_1055	1100992	1102875	+	34.1295	79.4834	66.7627	40.967	0.839959	0.515417
	elongation factor Tu	KO: K02358: elongation factor Tu; InterPro: IPR000795: Protein synthesis factor, GTP-binding; IPR004160: Translation elongation factor EFTu/EF1A, C-terminal; IPR004161: Translation elongation factor EFTu/EF1A, domain 2; IPR004541: Translation elongation factor EFTu/EF1A, bacterial/organelle; IPR005225: Small GTP-binding protein domain; IPR009000: Translation elongation/initiation factor/Ribosomal…	EMQU_1056	1103283	1104470	+	43.3502	221.814	201.731	119.524	0.909461	0.538849
fic	cell filamentation protein	InterPro: IPR003812: Filamentation induced by cAMP/death on curing-related	EMQU_1057	1104694	1105137	+	35.3604	45.991	0	26.7436	0	0.581496
	hypothetical protein	KO: K14205: phosphatidylglycerol lysyltransferase [EC:2.3.2.3]; InterPro: IPR016181: Acyl-CoA N-acyltransferase; IPR022791: Lysylphosphatidylglycerol synthetase/UPF0104; IPR024320: Lysylphosphatidylglycerol synthetase, domain of unknown function DUF2156	EMQU_1058	1105212	1107797	-	38.2831	80.2797	65.8531	59.3095	0.820296	0.738785
	alpha/beta hydrolase fold protein	KO: K00433	EMQU_1059	1107821	1108537	-	39.6095	107.816	47.6468	107.646	0.441926	0.998417
	hypothetical protein	InterPro: IPR023346: Lysozyme-like domain	EMQU_1060	1108748	1109377	+	39.0476	180.585	146.247	56.5435	0.809854	0.313113
	transmembrane protein	KO: K08974; InterPro: IPR007163: Protein of unknown function DUF368	EMQU_1061	1109459	1110316	+	38.6946	213.629	106.178	66.3134	0.49702	0.310414
	P-ATPase superfamily cation transporter	KO: K01552; InterPro: IPR001757: ATPase, P-type, K/Mg/Cd/Cu/Zn/Na/Ca/Na/H-transporter; IPR005834: Haloacid dehalogenase-like hydrolase; IPR006069: ATPase, P-type cation exchange, alpha subunit; IPR008250: ATPase, P-type, ATPase-associated domain; IPR018303: ATPase, P-type phosphorylation site; IPR023214: HAD-like domain; IPR023298: ATPase, P-type, transmembrane domain; IPR023299: ATPase, P-type, …	EMQU_1062	1110565	1112934	+	40.3376	130.882	152.228	109.18	1.16309	0.834191
	DNA primase	KO: K02316: DNA primase [EC:2.7.7.-]; InterPro: IPR002694: Zinc finger, CHC2-type; IPR006171: Toprim domain; IPR006295: DNA primase, DnaG; IPR013264: DNA primase, catalytic core, N-terminal; IPR019475: DNA primase, DnaB-helicase binding domain	EMQU_1063	1113103	1114944	+	40.7709	409.646	474.623	339.775	1.15862	0.829437
sigA	RNA polymerase sigma-43 factor	KO: K03086; InterPro: IPR000943: RNA polymerase sigma-70 factor; IPR007127: RNA polymerase sigma factor 70, region 1.1; IPR007624: RNA polymerase sigma-70 region 3; IPR007627: RNA polymerase sigma-70 region 2; IPR007630: RNA polymerase sigma-70 region 4; IPR009042: RNA polymerase sigma-70 region 1.2; IPR011991: Winged helix-turn-helix transcription repressor DNA-binding; IPR012760: RNA polymerase…	EMQU_1064	1114968	1116077	+	40.4505	415.233	858.965	502.333	2.06863	1.20976
	hypothetical protein		EMQU_1065	1116368	1118428	+	41.3877	346.773	397.819	191.565	1.1472	0.552421
	hypothetical protein	KO: K00243; InterPro: IPR014464: Predicted nucleic acid binding protein, YitL type	EMQU_1066	1118709	1119572	+	40.0463	185.698	133.598	156.329	0.719438	0.841847
	FUR family transcriptional regulator	KO: K03711; InterPro: IPR002481: Ferric-uptake regulator	EMQU_1067	1119677	1120150	+	40.0844	616.457	414.968	566.777	0.673149	0.919411
	integrase/recombinase XerD	KO: K04763; InterPro: IPR002104: Integrase, catalytic; IPR004107: Integrase, SAM-like, N-terminal; IPR010998: Integrase, Lambda-type, N-terminal; IPR011010: DNA breaking-rejoining enzyme, catalytic core; IPR011932: Tyrosine recombinase XerD; IPR013762: Integrase-like, catalytic core; IPR023009: Tyrosine recombinase XerC/XerD; IPR023109: Integrase/recombinase, N-terminal	EMQU_1068	1120247	1121134	+	38.964	269.923	346.827	246.264	1.28491	0.912347
	ribT family protein	KO: K02859; InterPro: IPR000182: GCN5-related N-acetyltransferase (GNAT) domain; IPR016181: Acyl-CoA N-acyltransferase	EMQU_1069	1121154	1121522	+	36.0434	459.839	465.715	349.949	1.01278	0.761026
scpA	segregation and condensation protein A	KO: K05896; InterPro: IPR003768: Prokaryotic chromosome segregation/condensation protein ScpA	EMQU_1070	1121528	1122289	+	38.3202	245.009	621.548	318.15	2.53684	1.29852
scpB	segregation and condensation protein B	KO: K06024; InterPro: IPR005234: Chromosome segregation/condensation protein ScpB, prokaryote; IPR011991: Winged helix-turn-helix transcription repressor DNA-binding	EMQU_1071	1122273	1122848	+	42.8819	351.138	363.95	219.033	1.03649	0.62378
rsuA2	pseudouridylate synthase	KO: K06178; InterPro: IPR000748: Pseudouridine synthase, RsuA/RluB/E/F; IPR002942: RNA-binding S4; IPR006145: Pseudouridine synthase, RsuA and RluB/C/D/E/F; IPR018496: Pseudouridine synthase, RsuA and RluB/E/F, conserved site; IPR020103: Pseudouridine synthase, catalytic domain	EMQU_1072	1122848	1123564	+	39.6095	433.978	339.303	215.981	0.781844	0.497678
	hypothetical protein	InterPro: IPR024529: ECF transporter, substrate-specific component	EMQU_1073	1123899	1124510	+	37.5817	380.531	132.787	95.3941	0.348953	0.250687
	C4-dicarboxylate anaerobic carrier-like protein	InterPro: IPR018385: C4-dicarboxylate anaerobic carrier-like	EMQU_1074	1125069	1126592	+	39.7638	1321.39	964.589	1131.71	0.729979	0.856449
	hypothetical protein	InterPro: IPR002933: Peptidase M20; IPR010964: Peptidase M20A, peptidase V-related; IPR011650: Peptidase M20, dimerisation	EMQU_1075	1126969	1128309	+	41.1633	826.27	1019.02	657.461	1.23328	0.795697
	hypothetical protein		EMQU_1076	1128523	1129254	+	40.1639	277.633	140.011	225.073	0.504303	0.810686
fer	ferredoxin	KO: K05337; InterPro: IPR010693: Ferredoxin soy-like; IPR017896: 4Fe-4S ferredoxin, iron-sulpur binding domain	EMQU_1077	1129512	1129733	-	36.9369	98.5521	132.902	0	1.34854	0
	hypothetical protein		EMQU_1078	1129763	1130782	+	40.1961	72.9286	80.1799	201.298	1.09943	2.7602
	ATP-dependent DNA helicase RecQ	KO: K03654: ATP-dependent DNA helicase RecQ [EC:3.6.4.12]; InterPro: IPR001650: Helicase, C-terminal; IPR004589: DNA helicase, ATP-dependent, RecQ type; IPR011545: DNA/RNA helicase, DEAD/DEAH box type, N-terminal; IPR014001: DEAD-like helicase	EMQU_1079	1130769	1132160	+	41.092	126.088	195.966	228.54	1.5542	1.81254
	lysM domain-containing protein	InterPro: IPR002482: Peptidoglycan-binding Lysin subgroup; IPR018392: Peptidoglycan-binding lysin domain	EMQU_1080	1132245	1132880	+	43.0818	590.156	651.905	553.1	1.10463	0.93721
	cytidylate kinase	KO: K00945: cytidylate kinase [EC:2.7.4.14]; InterPro: IPR003136: Cytidylate kinase; IPR011994: Cytidylate kinase domain	EMQU_1081	1133007	1133687	+	41.4097	244.88	111.732	122.054	0.456274	0.498425
rpsA	30S ribosomal protein S1	KO: K02945: small subunit ribosomal protein S1; InterPro: IPR000110: Ribosomal protein S1; IPR003029: Ribosomal protein S1, RNA-binding domain; IPR012340: Nucleic acid-binding, OB-fold; IPR016027: Nucleic acid-binding, OB-fold-like; IPR022967: RNA-binding domain, S1	EMQU_1082	1133821	1135053	+	40.0649	2634.42	3502.84	2863.4	1.32964	1.08692
	GTP-binding protein Der	KO: K03977; InterPro: IPR005225: Small GTP-binding protein domain; IPR006073: GTP binding domain; IPR015946: K homology domain-like, alpha/beta; IPR016484: GTP-binding protein EngA	EMQU_1083	1135266	1136576	+	42.4104	256.261	360.082	142.653	1.40514	0.556671
hupA	DNA-binding protein HU	KO: K03530; InterPro: IPR000119: Histone-like bacterial DNA-binding protein; IPR010992: IHF-like DNA-binding; IPR020816: Histone-like DNA-binding protein, conserved site; IPR023630: DNA-binding protein HU/Integration host factor	EMQU_1084	1136822	1137097	+	39.4928	3283.55	2861.9	3233.84	0.871588	0.984861
	hypothetical protein		EMQU_1085	1137341	1138387	+	36.6762	202.463	142.876	146.962	0.70569	0.725869
	hypothetical protein	InterPro: IPR011990: Tetratricopeptide-like helical; IPR013026: Tetratricopeptide repeat-containing; IPR019734: Tetratricopeptide repeat	EMQU_1086	1138388	1139647	+	38.6508	561.048	327.414	207.719	0.583574	0.370234
	IDEAL domain protein	InterPro: IPR011188: Uncharacterised protein family UPF0302; IPR014957: Bacteriophage SPP1, Gp90, C-terminal; IPR014963: Uncharacterised domain UPF0302, N-terminal	EMQU_1087	1139653	1140213	+	38.1462	590.188	703.074	563.545	1.19127	0.954857
	hypothetical protein	InterPro: IPR003740: Protein of unknown function DUF161; IPR019264: Domain of unknown function DUF2179	EMQU_1088	1140937	1141818	-	39.0023	81.0317	17.606	4.48758	0.217273	0.0553805
	nucleotide pyrophosphohydrolase	InterPro: IPR004518: NTP pyrophosphohydrolase MazG, putative catalytic core; IPR012359: NTP pyrophosphohydrolase MazG-related, YpjD; IPR023292: NTP pyrophosphohydrolase-like domain	EMQU_1089	1142066	1142404	+	39.823	172.103	47.3337	35.027	0.275032	0.203523
	poly A polymerase	KO: K00974: tRNA nucleotidyltransferase (CCA-adding enzyme) [EC:2.7.7.72 3.1.3.- 3.1.4.-]; InterPro: IPR002646: Poly A polymerase, head domain; IPR023068: tRNA nucleotidyltransferase, firmicutes	EMQU_1090	1142424	1143629	+	40.7131	114.089	74.2519	159.585	0.650822	1.39877
	hypothetical protein		EMQU_1091	1143895	1144350	+	37.7193	830.575	622.049	787.703	0.748937	0.948383
	hypothetical protein		EMQU_1092	1144579	1144854	+	35.1449	65.1777	176.29	14.3407	2.70476	0.220025
	CPA1 family monovalent cation:proton (H+) antiporter-1	KO: K03316; InterPro: IPR006153: Cation/H+ exchanger; IPR018421: Cation/H+ exchanger, CvrA-type, bacteria; IPR018422: Cation/H+ exchanger, CPA1 family	EMQU_1093	1144867	1146963	+	39.628	135.633	61.9561	22.8857	0.456794	0.168733
	ABC superfamily ATP binding cassette transporter, ABC protein	KO: K15738; InterPro: IPR003439: ABC transporter-like; IPR003593: ATPase, AAA+ type, core; IPR017871: ABC transporter, conserved site	EMQU_1094	1147185	1149071	+	39.5866	305.318	164.584	399.056	0.539058	1.30702
thyB	thymidylate synthase	KO: K00560: thymidylate synthase [EC:2.1.1.45]; InterPro: IPR000398: Thymidylate synthase; IPR020940: Thymidylate synthase, active site; IPR023451: Thymidylate synthase/dCMP hydroxymethylase domain	EMQU_1095	1149082	1150029	+	37.9747	506.192	193.287	413.862	0.381846	0.817599
thyA	thymidylate synthase	KO: K00287: dihydrofolate reductase [EC:1.5.1.3]; InterPro: IPR001796: Dihydrofolate reductase domain; IPR012259: Dihydrofolate reductase; IPR017925: Dihydrofolate reductase conserved site; IPR024072: Dihydrofolate reductase-like domain	EMQU_1096	1150044	1150556	+	38.5965	350.664	258.304	229.536	0.736615	0.654575
	degV family protein	InterPro: IPR003797: DegV	EMQU_1097	1150821	1151663	+	39.739	316.629	114.821	311.056	0.362637	0.982399
	GDSL family lipase/acylhydrolase	InterPro: IPR001087: Lipase, GDSL; IPR013830: Esterase, SGNH hydrolase-type; IPR013831: Esterase, SGNH hydrolase-type, subgroup	EMQU_1098	1151906	1152802	+	37.3467	172.362	68.6694	77.2194	0.398403	0.448008
	hypothetical protein	InterPro: IPR018672: Protein of unknown function DUF2140	EMQU_1099	1152795	1153451	+	35.9209	202.024	147.328	177.721	0.729258	0.879698
	methionine sulfoxide reductase A	KO: K07304; InterPro: IPR002569: Peptide methionine sulphoxide reductase MsrA	EMQU_1100	1153484	1154002	+	42.3892	249.184	405.916	104.862	1.62898	0.420819
	hypothetical protein	InterPro: IPR010673: Uncharacterised protein family UPF0346; IPR023089: YozE-like domain	EMQU_1101	1153999	1154226	+	37.2807	319.862	256.538	67.2694	0.802028	0.210308
	signal peptidase I	KO: K03100: signal peptidase I [EC:3.4.21.89]; InterPro: IPR000223: Peptidase S26A, signal peptidase I; IPR011056: Peptidase S24/S26A/S26B/S26C, beta-ribbon domain; IPR015927: Peptidase S24/S26A/S26B/S26C; IPR019757: Peptidase S26A, signal peptidase I, lysine active site; IPR019758: Peptidase S26A, signal peptidase I, conserved site; IPR019759: Peptidase S24/S26A/S26B	EMQU_1102	1154601	1155026	+	35.9155	178.042	66.8285	38.3262	0.375354	0.215265
	lactoylglutathione lyase	KO: K07032	EMQU_1103	1155079	1155477	-	36.8421	153.534	220.539	131.439	1.43642	0.856091
	hypothetical protein	InterPro: IPR001387: Helix-turn-helix type 3; IPR010982: Lambda repressor-like, DNA-binding	EMQU_1104	1155836	1156480	+	33.4884	49.7497	20.0627	144.975	0.403272	2.91409
	phosphotransferase	InterPro: IPR002575: Aminoglycoside phosphotransferase; IPR011009: Protein kinase-like domain	EMQU_1105	1157158	1157934	+	40.6692	93.8592	6.66174	84.6879	0.0709759	0.902287
ylqF	ribosome biogenesis GTP-binding protein	KO: K14540; InterPro: IPR006073: GTP binding domain; IPR016478: GTPase, MTG1; IPR019991: GTP-binding protein, ribosome biogenesis, YlqF; IPR023179: GTP-binding protein, orthogonal bundle domain	EMQU_1106	1158055	1158915	+	40.9988	78.4907	135.266	6.89555	1.72334	0.0878519
	ribonuclease HII	KO: K03470: ribonuclease HII [EC:3.1.26.4]; InterPro: IPR001352: Ribonuclease HII/HIII; IPR012337: Ribonuclease H-like domain; IPR024567: Ribonuclease HII/HIII domain	EMQU_1107	1158908	1159675	+	40.625	165.862	98.4012	103.074	0.593272	0.621446
	rossmann fold nucleotide-binding protein Smf	KO: K04096; InterPro: IPR003488: DNA recombination-mediator protein A	EMQU_1108	1159731	1160588	+	40.676	78.7651	39.8167	55.9339	0.505512	0.710136
	DNA topoisomerase I	KO: K03168; InterPro: IPR000380: DNA topoisomerase, type IA; IPR003601: DNA topoisomerase, type IA, domain 2; IPR003602: DNA topoisomerase, type IA, DNA-binding; IPR005733: DNA topoisomerase I, bacterial-type; IPR006171: Toprim domain; IPR013497: DNA topoisomerase, type IA, central; IPR013498: DNA topoisomerase, type IA, zn finger; IPR013824: DNA topoisomerase, type IA, central region, subdomain …	EMQU_1109	1160715	1162793	+	41.1255	319.684	303.5	261.538	0.949375	0.818114
gidA_1	tRNA (uracil-5-)-methyltransferase	KO: K04094; InterPro: IPR002218: Glucose-inhibited division protein A-related; IPR004417: Folate-dependent ribothymidyl synthase; IPR020595: Glucose-inhibited division protein A-related, conserved site	EMQU_1110	1162816	1164141	+	42.8356	645.321	737	314.539	1.14207	0.487416
	phage integrase family site specific recombinase	KO: K03733; InterPro: IPR002104: Integrase, catalytic; IPR004107: Integrase, SAM-like, N-terminal; IPR010998: Integrase, Lambda-type, N-terminal; IPR011010: DNA breaking-rejoining enzyme, catalytic core; IPR011931: Tyrosine recombinase XerC; IPR013762: Integrase-like, catalytic core; IPR023009: Tyrosine recombinase XerC/XerD; IPR023109: Integrase/recombinase, N-terminal	EMQU_1111	1164419	1165315	+	37.9041	305.156	282.756	110.313	0.926595	0.361498
	ATP-dependent protease subunit HslV	KO: K01419; InterPro: IPR001353: Proteasome, subunit alpha/beta; IPR022281: ATP-dependent protease, HslV subunit	EMQU_1112	1165340	1165888	+	42.0765	417.114	931.523	351.466	2.23326	0.842613
hslU	T01 family HslU component of HslUV peptidase	KO: K03667; InterPro: IPR003593: ATPase, AAA+ type, core; IPR003959: ATPase, AAA-type, core; IPR004491: Heat shock protein HslU; IPR013093: ATPase, AAA-2; IPR019489: Clp ATPase, C-terminal	EMQU_1113	1165900	1167297	+	38.9843	619.041	1215.55	592.787	1.9636	0.957589
	transcriptional repressor CodY	KO: K03706; InterPro: IPR000485: Transcription regulator HTH, AsnC-type; IPR010312: GTP-sensing transcriptional pleiotropic repressor CodY, N-terminal; IPR011991: Winged helix-turn-helix transcription repressor DNA-binding; IPR013198: GTP-sensing helix-turn-helix, CodY, C-terminal; IPR014154: GTP-sensing transcriptional pleiotropic repressor CodY	EMQU_1114	1167313	1168104	+	40.2778	802.337	709.763	685.911	0.88462	0.854892
galM4	aldose 1-epimerase	InterPro: IPR008183: Aldose 1-epimerase; IPR011013: Glycoside hydrolase-type carbohydrate-binding; IPR014718: Glycoside hydrolase-type carbohydrate-binding, subgroup	EMQU_1115	1168171	1169046	+	39.9543	671.564	1050.6	498.145	1.5644	0.741767
	hypothetical protein	KO: K08591: glycerol-3-phosphate acyltransferase PlsY [EC:2.3.1.15]; InterPro: IPR003811: Glycerol-3-phosphate acyltransferase, bacteria	EMQU_1116	1169184	1169819	-	38.3648	186.526	125.335	185.144	0.671944	0.992594
	coA-binding protein	KO: K06929; InterPro: IPR003781: CoA-binding; IPR016040: NAD(P)-binding domain	EMQU_1117	1169917	1170342	+	41.0798	517.005	375.455	519.145	0.726211	1.00414
parE	DNA topoisomerase (ATP-hydrolyzing) subunit ParE	KO: K02622; InterPro: IPR000565: DNA topoisomerase, type IIA, subunit B; IPR001241: DNA topoisomerase, type IIA; IPR002288: DNA topoisomerase, type IIA, subunit B, C-terminal; IPR003594: ATPase-like, ATP-binding domain; IPR005740: DNA topoisomerase IV, subunit B, Gram-positive; IPR013506: DNA topoisomerase, type IIA, subunit B, domain 2; IPR013759: DNA topoisomerase, type IIA, subunit B/N-termina…	EMQU_1118	1170620	1172665	+	41.9844	692.215	680.543	569.719	0.983137	0.823037
parC	DNA topoisomerase (ATP-hydrolyzing) subunit ParC	KO: K02621; InterPro: IPR002205: DNA topoisomerase, type IIA, subunit A/C-terminal; IPR005741: DNA topoisomerase IV, subunit A, Gram-positive; IPR006691: DNA gyrase/topoisomerase IV, subunit A, C-terminal beta-pinwheel; IPR013758: DNA topoisomerase, type IIA, subunit A/ C-terminal, alpha-beta; IPR013760: DNA topoisomerase, type IIA, central; IPR024946: Arginine repressor C-terminal-like domain	EMQU_1119	1172677	1175127	+	40.9629	999.358	711.697	945.305	0.712154	0.945911
	formate acetyltransferase	KO: K00656: formate C-acetyltransferase [EC:2.3.1.54]; InterPro: IPR001150: Formate C-acetyltransferase glycine radical; IPR004184: Pyruvate formate-lyase, PFL; IPR005949: Formate acetyltransferase; IPR019777: Formate C-acetyltransferase glycine radical, conserved site	EMQU_1120	1175401	1177632	+	40.3674	4501.62	11246.1	6833.48	2.49824	1.51801
pflA	pyruvate formate-lyase activating enzyme	KO: K04069; InterPro: IPR001989: Radical-activating enzyme, conserved site; IPR007197: Radical SAM; IPR012838: Pyruvate formate-lyase activating enzyme	EMQU_1121	1177831	1178592	+	39.3701	1798.01	2711.72	2577.02	1.50818	1.43326
	putative manganese-dependent inorganic pyrophosphatase	KO: K15986: manganese-dependent inorganic pyrophosphatase [EC:3.6.1.1]; InterPro: IPR001667: Phosphoesterase, RecJ-like; IPR004097: DHHA2; IPR022934: Manganese-dependent inorganic pyrophosphatase, probable	EMQU_1122	1178677	1179603	+	37.8641	438.988	262.438	219.358	0.597826	0.49969
	hypothetical protein	InterPro: IPR014924: Protein of unknown function DUF1803	EMQU_1123	1179702	1180553	+	38.615	120.406	57.108	103.364	0.474294	0.858464
	integral membrane protein	InterPro: IPR019264: Domain of unknown function DUF2179; IPR022930: Uncharacterised protein family UPF0316	EMQU_1124	1181467	1182015	-	38.2514	107.157	58.4559	136.982	0.545518	1.27833
	hypothetical protein		EMQU_1125	1182185	1182403	-	34.7032	204.244	196.175	49.7015	0.96049	0.243343
	alpha/beta hydrolase	KO: K06889	EMQU_1126	1182548	1183309	+	38.7139	252.666	232.316	109.729	0.919461	0.434286
	transcriptional regulator	InterPro: IPR000843: Transcription regulator HTH, LacI; IPR001761: Periplasmic binding protein/LacI transcriptional regulator; IPR010982: Lambda repressor-like, DNA-binding	EMQU_1127	1183467	1184435	+	40.9701	330.148	285.785	205.765	0.865626	0.623252
	hypothetical protein		EMQU_1128	1184498	1185190	+	36.2193	730.338	651.317	356.967	0.891801	0.488769
	alcohol dehydrogenase	InterPro: IPR002085: Alcohol dehydrogenase superfamily, zinc-type; IPR002364: Quinone oxidoreductase/zeta-crystallin, conserved site; IPR011032: GroES-like; IPR013154: Alcohol dehydrogenase GroES-like; IPR016040: NAD(P)-binding domain; IPR020843: Polyketide synthase, enoylreductase	EMQU_1129	1185363	1186391	+	41.3022	174.348	99.0968	131.743	0.568385	0.755629
	yitT family protein	InterPro: IPR003740: Protein of unknown function DUF161	EMQU_1130	1186525	1187190	-	35.7357	111.692	8.54924	126.289	0.0765427	1.13069
	hypothetical protein		EMQU_1131	1187698	1187913	+	31.0185	112.544	0	11.4527	0	0.101762
	ABC transporter permease	KO: K05845: osmoprotectant transport system substrate-binding protein; InterPro: IPR000515: Binding-protein-dependent transport systems inner membrane component; IPR007210: ABC-type glycine betaine transport system, substrate-binding domain	EMQU_1132	1188043	1189581	+	39.7661	220.507	201.127	151.095	0.912112	0.685215
	choline ABC transporter ATP-binding protein	KO: K05847: osmoprotectant transport system ATP-binding protein; InterPro: IPR003439: ABC transporter-like; IPR003593: ATPase, AAA+ type, core; IPR017871: ABC transporter, conserved site	EMQU_1133	1189578	1190525	+	39.346	186.681	247.888	170.138	1.32787	0.911382
	transcriptional antiterminator	InterPro: IPR007737: M trans-acting positive regulator; IPR013199: Helix-turn-helix Mga, DNA-binding trans-acting positive regulator	EMQU_1134	1190936	1192420	+	33.1313	40.9251	0.348564	47.31	0.00851711	1.15601
	transcriptional antiterminator	InterPro: IPR007737: M trans-acting positive regulator; IPR013199: Helix-turn-helix Mga, DNA-binding trans-acting positive regulator	EMQU_1135	1192751	1194223	+	30.7536	49.1802	5.62246	18.4736	0.114324	0.375631
	hypothetical protein	InterPro: IPR019931: LPXTG-motif cell wall anchor	EMQU_1136	1194566	1194895	+	37.5758	33.886	23.5281	5.99704	0.69433	0.176977
	hypothetical protein		EMQU_1137	1194937	1195539	+	39.9668	41.9269	20.6017	48.4089	0.491372	1.1546
	hypothetical protein		EMQU_1138	1195639	1196163	+	32.1905	44.4517	0	24.5022	0	0.551209
	aggregation promoting factor	InterPro: IPR002482: Peptidoglycan-binding Lysin subgroup; IPR018392: Peptidoglycan-binding lysin domain	EMQU_1139	1196274	1196870	-	43.0486	4.07195	0	0	0	0
	hypothetical protein	InterPro: IPR007211: Protein of unknown function DUF378	EMQU_1140	1197270	1197482	-	32.3944	1275.96	852.975	146.336	0.668494	0.114687
	hypothetical protein		EMQU_1141	1197719	1198384	+	32.7327	41.6109	10.1036	15.6004	0.242812	0.374912
	hypothetical protein		EMQU_1142	1198475	1198756	+	34.7518	181.028	89.9406	108.776	0.496832	0.600879
	hypothetical protein		EMQU_1143	1199050	1199211	+	38.2716	186.073	19.171	204.621	0.10303	1.09968
	aminotransferase AlaT	KO: K14260: alanine-synthesizing transaminase [EC:2.6.1.66 2.6.1.2]; InterPro: IPR001176: 1-aminocyclopropane-1-carboxylate synthase; IPR004839: Aminotransferase, class I/classII; IPR015421: Pyridoxal phosphate-dependent transferase, major region, subdomain 1; IPR015422: Pyridoxal phosphate-dependent transferase, major region, subdomain 2; IPR015424: Pyridoxal phosphate-dependent transferase, maj…	EMQU_1144	1199346	1200563	+	40.2299	271.037	184.863	82.8655	0.682059	0.305735
	cro/CI family transcriptional regulator	InterPro: IPR001387: Helix-turn-helix type 3; IPR010982: Lambda repressor-like, DNA-binding; IPR011990: Tetratricopeptide-like helical	EMQU_1145	1200998	1201834	+	34.6476	121.402	44.5262	33.1019	0.366766	0.272663
	N-acetylglucosamine-6-phosphate deacetylase	KO: K01443: N-acetylglucosamine-6-phosphate deacetylase [EC:3.5.1.25]; InterPro: IPR003764: N-acetylglucosamine-6-phosphate deacetylase; IPR006680: Amidohydrolase 1; IPR011059: Metal-dependent hydrolase, composite domain	EMQU_1146	1201909	1203057	+	42.1236	418.911	173.44	97.7455	0.414026	0.233332
	regulatory protein MerR	InterPro: IPR000551: Transcription regulator HTH, MerR; IPR009061: DNA binding domain, putative; IPR010499: Bacterial transcription activator, effector binding; IPR011256: Regulatory factor, effector, bacterial	EMQU_1147	1203152	1203931	-	34.359	55.4756	11.2814	12.686	0.203358	0.228678
pmr1	P-ATPase superfamily P-type ATPase cation transporter	KO: K01552; InterPro: IPR000695: ATPase, P-type, H+ transporting proton pump; IPR001757: ATPase, P-type, K/Mg/Cd/Cu/Zn/Na/Ca/Na/H-transporter; IPR004014: ATPase, P-type cation-transporter, N-terminal; IPR005834: Haloacid dehalogenase-like hydrolase; IPR006068: ATPase, P-type cation-transporter, C-terminal; IPR008250: ATPase, P-type, ATPase-associated domain; IPR018303: ATPase, P-type phosphorylat…	EMQU_1148	1204102	1206693	+	39.429	67.1513	38.1423	53.8276	0.568006	0.801587
	hypothetical protein		EMQU_1149	1206952	1207311	-	38.8889	99.9392	1.43783	8.24593	0.014387	0.0825095
	hypothetical protein	KO: K15051	EMQU_1150	1207321	1208133	-	40.5904	87.311	17.1902	20.6909	0.196885	0.236979
	hypothetical protein		EMQU_1151	1208260	1208784	+	40.381	251.893	374.656	288.372	1.48736	1.14482
	hypothetical protein	KO: K07192: flotillin; InterPro: IPR001107: Band 7 protein	EMQU_1152	1208798	1210279	+	42.0378	578.048	726.481	519.46	1.25678	0.898645
	hypothetical protein	InterPro: IPR010343: Protein of unknown function DUF939	EMQU_1153	1210329	1210925	-	37.6884	68.4087	53.7559	66.2989	0.785805	0.969159
	hypothetical protein	InterPro: IPR010343: Protein of unknown function DUF939; IPR021062: Protein of unknown function DUF939, C-terminal	EMQU_1154	1211035	1212000	+	37.9917	114.753	23.5768	81.435	0.205457	0.709654
	oxidoreductase family, NAD-binding Rossmann fold protein	InterPro: IPR000683: Oxidoreductase, N-terminal; IPR004104: Oxidoreductase, C-terminal; IPR016040: NAD(P)-binding domain	EMQU_1155	1212058	1213017	-	40.3125	164.596	132.1	82.4593	0.802574	0.500981
	hypothetical protein		EMQU_1156	1213214	1213750	+	36.1266	381.166	564.849	187.952	1.4819	0.493097
	D-alanyl-D-alanine carboxypeptidase	InterPro: IPR003709: Peptidase M15B/M15C; IPR009045: Hedgehog signalling/DD-peptidase zinc-binding domain	EMQU_1157	1213764	1214564	+	41.573	571.168	469.798	610.878	0.822521	1.06953
	mannosyl-glycoprotein endo-beta-N-acetylglucosamidase	InterPro: IPR000423: Flagellar protein FlgJ type-1; IPR002901: Mannosyl-glycoprotein endo-beta-N-acetylglucosamidase; IPR013338: Lysozyme domain, subfamily 2	EMQU_1158	1214574	1215188	+	39.187	519.394	492.368	440.856	0.947966	0.848789
	dihydrodipicolinate synthase/N-acetylneuraminate lyase	InterPro: IPR011060: Ribulose-phosphate binding barrel; IPR013785: Aldolase-type TIM barrel	EMQU_1159	1215213	1215890	+	43.2153	589.452	822.996	425.432	1.39621	0.721741
xpt	xanthine phosphoribosyltransferase	KO: K03816: xanthine phosphoribosyltransferase [EC:2.4.2.22]; InterPro: IPR000836: Phosphoribosyltransferase; IPR010079: Xanthine phosphoribosyltransferase	EMQU_1160	1216350	1216931	+	41.5808	225.552	11.5619	89.2601	0.0512604	0.39574
pbuX	NCS2 family nucleobase:cation symporter-2, xanthine permease	KO: K16169; InterPro: IPR006042: Xanthine/uracil permease; IPR006043: Xanthine/uracil/vitamin C permease; IPR017588: Xanthine permease	EMQU_1161	1216934	1218238	+	41.2261	235.83	79.725	73.1708	0.338061	0.310269
purE	phosphoribosylaminoimidazole carboxylase catalytic subunit	KO: K01588: 5-(carboxyamino)imidazole ribonucleotide mutase [EC:5.4.99.18]; InterPro: IPR000031: N5-carboxyaminoimidazole ribonucleotide mutase PurE domain	EMQU_1162	1218681	1219169	+	43.5583	249.558	25.4045	118.377	0.101798	0.474347
purK	phosphoribosylaminoimidazole carboxylase ATPasesubunit	KO: K01589: 5-(carboxyamino)imidazole ribonucleotide synthase [EC:6.3.4.18]; InterPro: IPR003135: ATP-grasp fold, ATP-dependent carboxylate-amine ligase-type; IPR005875: Phosphoribosylaminoimidazole carboxylase, ATPase subunit; IPR011054: Rudiment single hybrid motif; IPR011761: ATP-grasp fold; IPR013815: ATP-grasp fold, subdomain 1; IPR013816: ATP-grasp fold, subdomain 2; IPR013817: Pre-ATP-gras…	EMQU_1163	1219162	1220286	+	42.4889	395.003	187.723	88.3964	0.475244	0.223787
	adenylosuccinate lyase	KO: K01756: adenylosuccinate lyase [EC:4.3.2.2]; InterPro: IPR000362: Fumarate lyase; IPR003031: Delta crystallin; IPR004769: Adenylosuccinate lyase; IPR008948: L-Aspartase-like; IPR019468: Adenylosuccinate lyase C-terminal; IPR020557: Fumarate lyase, conserved site; IPR022761: Lyase 1, N-terminal; IPR024083: L-Aspartase-like, N-terminal	EMQU_1164	1220300	1221595	+	41.4352	436.296	402.591	217.601	0.922748	0.498746
	hypothetical protein		EMQU_1165	1221736	1222113	-	37.037	650.826	377.943	319.366	0.580712	0.490709
	phosphoribosylaminoimidazolesuccinocarboxamide synthase	KO: K01923: phosphoribosylaminoimidazole-succinocarboxamide synthase [EC:6.3.2.6]; InterPro: IPR001636: SAICAR synthetase; IPR013816: ATP-grasp fold, subdomain 2; IPR018236: SAICAR synthetase, conserved site	EMQU_1166	1222370	1223101	+	37.4317	94.9798	108.898	9.46254	1.14653	0.0996269
purS	phosphoribosylformylglycinamidine synthase subunit PurS	KO: K01952: phosphoribosylformylglycinamidine synthase [EC:6.3.5.3]; InterPro: IPR003850: Phosphoribosylformylglycinamidine synthetase, PurS subunit	EMQU_1167	1223105	1223359	+	35.6863	116.304	170.509	343.419	1.46606	2.95276
	phosphoribosylformylglycinamidine synthetase I	KO: K01952: phosphoribosylformylglycinamidine synthase [EC:6.3.5.3]; InterPro: IPR010075: Phosphoribosylformylglycinamidine synthase I; IPR017926: Glutamine amidotransferase type 1	EMQU_1168	1223361	1224035	+	43.5556	158.462	314.405	174.447	1.9841	1.10088
	phosphoribosylformylglycinamidine synthase II	KO: K01952: phosphoribosylformylglycinamidine synthase [EC:6.3.5.3]; InterPro: IPR000728: AIR synthase-related protein; IPR010074: Phosphoribosylformylglycinamidine synthase II; IPR010918: AIR synthase-related protein, C-terminal; IPR016188: PurM, N-terminal-like	EMQU_1169	1224036	1226258	+	44.3995	173.655	286.168	94.5889	1.64791	0.544694
	amidophosphoribosyltransferase	KO: K00764: amidophosphoribosyltransferase [EC:2.4.2.14]; InterPro: IPR000583: Glutamine amidotransferase, class-II; IPR000836: Phosphoribosyltransferase; IPR005854: Amidophosphoribosyl transferase; IPR017932: Glutamine amidotransferase, type II	EMQU_1170	1226243	1227682	+	43.4722	136.066	279.298	46.0398	2.05267	0.338364
purM	phosphoribosylformylglycinamidine cyclo-ligase	KO: K01933: phosphoribosylformylglycinamidine cyclo-ligase [EC:6.3.3.1]; InterPro: IPR000728: AIR synthase-related protein; IPR004733: Phosphoribosylformylglycinamidine cyclo-ligase; IPR010918: AIR synthase-related protein, C-terminal; IPR016188: PurM, N-terminal-like	EMQU_1171	1227713	1228756	+	43.3908	157.872	115.522	149.754	0.731743	0.948575
purN	phosphoribosylglycinamide formyltransferase	KO: K11175: phosphoribosylglycinamide formyltransferase 1 [EC:2.1.2.2]; InterPro: IPR002376: Formyl transferase, N-terminal; IPR004607: Phosphoribosylglycinamide formyltransferase	EMQU_1172	1228753	1229331	+	40.5872	144.43	239.588	82.0321	1.65886	0.567972
purH	bifunctional phosphoribosylaminoimidazolecarboxamide formyltransferase/IMP cyclohydrolase	KO: K00602: phosphoribosylaminoimidazolecarboxamide formyltransferase / IMP cyclohydrolase [EC:2.1.2.3 3.5.4.10]; InterPro: IPR002695: AICARFT/IMPCHase bienzyme; IPR011607: Methylglyoxal synthase-like domain; IPR016193: Cytidine deaminase-like; IPR024051: AICAR transformylase domain	EMQU_1173	1229328	1230860	+	44.6836	149.695	101.633	123.286	0.678933	0.82358
	phosphoribosylamine--glycine ligase	KO: K01945: phosphoribosylamine--glycine ligase [EC:6.3.4.13]; InterPro: IPR000115: Phosphoribosylglycinamide synthetase; IPR011054: Rudiment single hybrid motif; IPR011761: ATP-grasp fold; IPR013815: ATP-grasp fold, subdomain 1; IPR013816: ATP-grasp fold, subdomain 2; IPR013817: Pre-ATP-grasp fold; IPR016185: PreATP-grasp-like fold; IPR020559: Phosphoribosylglycinamide synthetase, conserved site…	EMQU_1174	1230876	1232141	+	45.8926	125.58	51.1076	56.2755	0.406972	0.448125
	aldo/keto reductase family oxidoreductase	InterPro: IPR001395: Aldo/keto reductase; IPR020471: Aldo/keto reductase subgroup; IPR023210: NADP-dependent oxidoreductase domain	EMQU_1175	1232260	1233174	+	41.3115	496.286	434.459	513.681	0.875421	1.03505
	hypothetical protein		EMQU_1176	1233280	1234398	+	36.3718	23.8968	31.9174	82.6804	1.33564	3.4599
guaC	GMP reductase	KO: K00364: GMP reductase [EC:1.7.1.7]; InterPro: IPR001093: IMP dehydrogenase/GMP reductase; IPR001295: Dihydroorotate dehydrogenase, conserved site; IPR005994: Guanosine monophosphate reductase 2; IPR006594: LisH dimerisation motif; IPR013785: Aldolase-type TIM barrel; IPR015875: IMP dehydrogenase / GMP reductase, conserved site	EMQU_1177	1234635	1235612	+	38.5481	149.138	151.369	21.7531	1.01496	0.145858
	gntR family transcriptional regulator	InterPro: IPR000524: Transcription regulator HTH, GntR; IPR004839: Aminotransferase, class I/classII; IPR011991: Winged helix-turn-helix transcription repressor DNA-binding; IPR015421: Pyridoxal phosphate-dependent transferase, major region, subdomain 1; IPR015424: Pyridoxal phosphate-dependent transferase, major domain	EMQU_1178	1235855	1237291	+	41.7537	93.0427	27.3757	110.864	0.294228	1.19154
	pyruvate dehydrogenase E1 component subunit alpha	KO: K00161: pyruvate dehydrogenase E1 component subunit alpha [EC:1.2.4.1]; InterPro: IPR001017: Dehydrogenase, E1 component; IPR017596: Pyruvate dehydrogenase (acetyl-transferring) E1 component, alpha subunit subgroup x	EMQU_1179	1237809	1238918	+	39.9099	4676.63	8146.18	5273.83	1.74189	1.1277
pdhB	pyruvate dehydrogenase complex, E1 component subunit beta	KO: K00162: pyruvate dehydrogenase E1 component subunit beta [EC:1.2.4.1]; InterPro: IPR005475: Transketolase-like, pyrimidine-binding domain; IPR005476: Transketolase, C-terminal; IPR009014: Transketolase, C-terminal/Pyruvate-ferredoxin oxidoreductase, domain II; IPR015941: Transketolase-like, C-terminal	EMQU_1180	1238921	1239898	+	41.7178	6627.2	17242.8	9185.36	2.60182	1.38601
	dihydrolipoamide acetyltransferase	KO: K00627: pyruvate dehydrogenase E2 component (dihydrolipoamide acetyltransferase) [EC:2.3.1.12]; InterPro: IPR000089: Biotin/lipoyl attachment; IPR001078: 2-oxoacid dehydrogenase acyltransferase, catalytic domain; IPR003016: 2-oxo acid dehydrogenase, lipoyl-binding site; IPR004167: E3 binding; IPR011053: Single hybrid motif; IPR023213: Chloramphenicol acetyltransferase-like domain	EMQU_1181	1239923	1241575	+	43.0127	6567.54	14974.3	9584.73	2.28004	1.45941
	dihydrolipoamide dehydrogenase	KO: K00382: dihydrolipoamide dehydrogenase [EC:1.8.1.4]; InterPro: IPR004099: Pyridine nucleotide-disulphide oxidoreductase, dimerisation; IPR006258: Dihydrolipoamide dehydrogenase; IPR012999: Pyridine nucleotide-disulphide oxidoreductase, class I, active site; IPR013027: FAD-dependent pyridine nucleotide-disulphide oxidoreductase; IPR016156: FAD/NAD-linked reductase, dimerisation; IPR023753: Pyr…	EMQU_1182	1241583	1242989	+	42.9993	5113.81	13692	8079.25	2.67746	1.57989
	hypothetical protein	InterPro: IPR007920: Uncharacterised protein family UPF0223; IPR023324: BH2638-like domain	EMQU_1183	1243158	1243433	+	38.7681	132.117	93.7713	7.17037	0.709759	0.0542729
	inositol monophosphatase family protein	KO: K01092: myo-inositol-1(or 4)-monophosphatase [EC:3.1.3.25]; InterPro: IPR000760: Inositol monophosphatase	EMQU_1184	1243447	1244205	+	41.502	99.9285	60.0136	58.6667	0.600566	0.587087
tufA3	elongation factor EF1A	KO: K06207; InterPro: IPR000640: Translation elongation factor EFG/EF2, C-terminal; IPR000795: Protein synthesis factor, GTP-binding; IPR004161: Translation elongation factor EFTu/EF1A, domain 2; IPR005225: Small GTP-binding protein domain; IPR006298: GTP-binding protein TypA; IPR009000: Translation elongation/initiation factor/Ribosomal, beta-barrel; IPR009022: Elongation factor G/III/V	EMQU_1185	1244553	1246382	+	40.765	292.777	216.381	70.8339	0.739064	0.241938
	wall-associated protein	InterPro: IPR019931: LPXTG-motif cell wall anchor	EMQU_1186	1246944	1252013	+	39.6647	36.728	15.4162	19.517	0.41974	0.531393
recQ2	ATP-dependent helicase RecQ	KO: K03654: ATP-dependent DNA helicase RecQ [EC:3.6.4.12]; InterPro: IPR001650: Helicase, C-terminal; IPR002121: Helicase/RNase D C-terminal, HRDC domain; IPR004589: DNA helicase, ATP-dependent, RecQ type; IPR006293: DNA helicase, ATP-dependent, RecQ type, bacterial; IPR010997: HRDC-like; IPR011545: DNA/RNA helicase, DEAD/DEAH box type, N-terminal; IPR014001: DEAD-like helicase; IPR018982: RQC do…	EMQU_1187	1252448	1254226	+	41.0343	80.8951	94.5619	79.8173	1.16894	0.986676
	hypothetical protein	InterPro: IPR009983: Uncharacterised protein family UPF0358	EMQU_1188	1254324	1254626	+	37.9538	160.459	143.498	81.6429	0.894297	0.508809
ftsW2	ftsW/RodA/SpoVE family cell division protein	KO: K03588: cell division protein FtsW; InterPro: IPR001182: Cell cycle protein; IPR018365: Cell cycle, FtsW / RodA / SpoVE, conserved site	EMQU_1189	1254629	1255795	+	39.6744	170.812	198.265	237.415	1.16072	1.38992
	pyruvate carboxylase	KO: K01958: pyruvate carboxylase [EC:6.4.1.1]; InterPro: IPR000089: Biotin/lipoyl attachment; IPR000891: Pyruvate carboxyltransferase; IPR003379: Carboxylase, conserved domain; IPR005479: Carbamoyl-phosphate synthetase, large subunit, ATP-binding; IPR005481: Carbamoyl-phosphate synthase, large subunit, N-terminal; IPR005482: Biotin carboxylase, C-terminal; IPR005930: Pyruvate carboxylase; IPR0110…	EMQU_1190	1255817	1259245	+	43.1904	458.542	328.624	489.706	0.716673	1.06796
	hypothetical protein		EMQU_1191	1259263	1260393	+	38.55	128.533	65.9035	98.8637	0.512736	0.769169
	hypothetical protein	InterPro: IPR010368: Uncharacterised protein family UPF0342; IPR023378: YheA/YmcA-like domain	EMQU_1192	1260371	1260811	+	36.5079	74.9681	66.9029	93.1173	0.892418	1.24209
	hypothetical protein	InterPro: IPR016979: Uncharacterised protein family UPF0298	EMQU_1193	1260795	1261136	+	35.0877	164.907	7.56751	1.44665	0.0458896	0.00877256
	methyltransferase	InterPro: IPR002052: DNA methylase, N-6 adenine-specific, conserved site; IPR004398: RNA methyltransferase, RsmD	EMQU_1194	1261320	1261877	+	38.7097	117.627	22.2631	86.8926	0.189269	0.738715
coaD	pantetheine-phosphate adenylyltransferase	KO: K00954: pantetheine-phosphate adenylyltransferase [EC:2.7.7.3]; InterPro: IPR001980: Coenzyme A biosynthesis protein; IPR004820: Cytidylyltransferase; IPR004821: Cytidyltransferase-related; IPR014729: Rossmann-like alpha/beta/alpha sandwich fold	EMQU_1195	1261878	1262369	+	41.8699	78.0672	82.0613	137.767	1.05116	1.76473
	S16 family peptidase	KO: K07177; InterPro: IPR008269: Peptidase S16, Lon C-terminal; IPR020568: Ribosomal protein S5 domain 2-type fold	EMQU_1196	1262356	1263402	+	40.4011	143.025	20.764	77.9701	0.145178	0.545152
	hypothetical protein		EMQU_1197	1263705	1264847	+	38.9326	146.325	67.0231	89.1686	0.458042	0.609387
	comE operon protein 1	KO: K02237; InterPro: IPR003583: Helix-hairpin-helix DNA-binding motif, class 1; IPR004509: Competence protein ComEA, helix-hairpin-helix domain; IPR010994: RuvA domain 2-like; IPR019554: Soluble ligand binding domain	EMQU_1198	1265048	1265620	+	41.0122	90.7895	93.0447	47.4897	1.02484	0.523074
	comE operon protein 2	KO: K01493: dCMP deaminase [EC:3.5.4.12]; InterPro: IPR002125: CMP/dCMP deaminase, zinc-binding; IPR013404: Competence operon E, ComEB; IPR015517: Cytidine deaminase; IPR016192: APOBEC/CMP deaminase, zinc-binding; IPR016193: Cytidine deaminase-like; IPR016473: dCMP deaminase	EMQU_1199	1265640	1266122	+	39.9586	144.951	128.601	29.7058	0.887199	0.204937
comEC	competence protein ComEC	KO: K02238; InterPro: IPR001279: Beta-lactamase-like; IPR004477: ComEC/Rec2-related protein; IPR004797: Competence protein ComEC/Rec2	EMQU_1200	1266376	1268391	+	40.1786	62.7031	37.4862	26.9956	0.597836	0.43053
holA	DNA-directed DNA polymerase III subunit delta	KO: K02340: DNA polymerase III subunit delta [EC:2.7.7.7]; InterPro: IPR005790: DNA polymerase III, delta subunit; IPR008921: DNA polymerase III, clamp loader complex, gamma/delta/delta subunit, C-terminal; IPR010372: DNA polymerase III, delta	EMQU_1201	1268440	1269474	+	35.6522	50.7329	14.5033	99.4292	0.285875	1.95986
rpsT	30S ribosomal protein S20	KO: K02968: small subunit ribosomal protein S20; InterPro: IPR002583: Ribosomal protein S20	EMQU_1202	1269589	1269843	-	38.0392	1839.9	661.738	1437.7	0.35966	0.781404
	hypothetical protein		EMQU_1203	1270245	1270514	-	33.3333	70.2275	3.8342	0	0.0545969	0
	hypothetical protein		EMQU_1204	1270710	1270835	-	30.1587	92.6077	78.0534	282.718	0.842839	3.05285
	integral membrane protein	InterPro: IPR007382: Uncharacterised protein family UPF0756, transmembrame	EMQU_1205	1270906	1271361	-	40.5702	139.673	21.5674	189.873	0.154413	1.35941
	hypothetical protein	InterPro: IPR010738: Protein of unknown function DUF1310	EMQU_1206	1271796	1272224	+	33.3333	29.4661	36.197	20.759	1.22843	0.704504
	hypothetical protein	InterPro: IPR002921: Lipase, class 3	EMQU_1207	1272211	1273239	+	40.1361	81.7405	13.0788	4.80812	0.160004	0.0588218
	hypothetical protein		EMQU_1208	1273240	1273449	+	41.9048	11.576	4.92969	0	0.425856	0
	hypothetical protein		EMQU_1209	1273449	1273778	+	35.4545	38.3059	62.7415	0	1.63791	0
	hypothetical protein		EMQU_1210	1273801	1274040	+	39.5833	131.677	21.5674	43.2911	0.163791	0.328769
	hypothetical protein		EMQU_1211	1274222	1275178	-	39.2894	152.919	307.758	244.534	2.01256	1.59911
	padR family transcriptional regulator	KO: K10947; InterPro: IPR005149: Transcription regulator PadR N-terminal; IPR011991: Winged helix-turn-helix transcription repressor DNA-binding	EMQU_1212	1275175	1275507	-	40.8408	150.383	93.2644	123.318	0.620178	0.820022
	hypothetical protein		EMQU_1213	1275769	1275903	+	28.1481	18.0071	0	3.66486	0	0.203523
	ABC superfamily ATP binding cassette transporter, ABC protein	KO: K06158; InterPro: IPR003439: ABC transporter-like; IPR003593: ATPase, AAA+ type, core	EMQU_1214	1276015	1277598	+	37.3737	70.2889	38.2331	22.8012	0.543942	0.324393
	undecaprenyl pyrophosphate phosphatase	KO: K06153: undecaprenyl-diphosphatase [EC:3.6.1.27]; InterPro: IPR003824: Bacitracin resistance protein BacA	EMQU_1215	1277714	1278547	-	40.7674	166.727	10.551	17.797	0.0632827	0.106743
gpmA2_1	phosphoglycerate mutase	KO: K15634: probable phosphoglycerate mutase [EC:5.4.2.1]; InterPro: IPR013078: Histidine phosphatase superfamily, clade-1	EMQU_1216	1278701	1279405	-	41.2766	212.407	222.465	326.328	1.04736	1.53634
	metallo-beta-lactamase superfamily protein	InterPro: IPR001279: Beta-lactamase-like	EMQU_1217	1279429	1280055	-	41.4673	198.508	149.424	59.1813	0.752733	0.29813
dinG	DNA-directed DNA polymerase III subunit epsilon	InterPro: IPR001650: Helicase, C-terminal; IPR006554: Helicase-like, DEXD box c2 type; IPR006555: Helicase, ATP-dependent, c2 type; IPR010614: DEAD2; IPR014013: Helicase, superfamily 1/2, ATP-binding domain, DinG/Rad3-type	EMQU_1218	1280371	1282719	+	39.3785	125.842	75.8026	61.9235	0.602362	0.492072
trpF	N-(5'phosphoribosyl)anthranilate isomerase	KO: K09767; InterPro: IPR007551: Protein of unknown function DUF520	EMQU_1219	1282778	1283272	-	36.5657	232.782	107.706	207.897	0.462691	0.893099
	hypothetical protein	InterPro: IPR003740: Protein of unknown function DUF161; IPR019264: Domain of unknown function DUF2179	EMQU_1220	1283435	1284376	+	39.5966	103.225	92.3139	51.9966	0.894297	0.503721
	hypothetical protein	InterPro: IPR002744: Domain of unknown function DUF59	EMQU_1221	1284625	1284963	+	41.2979	134.814	87.033	281.675	0.645579	2.08936
	hypothetical protein HMPREF9954_1121	KO: K01817: phosphoribosylanthranilate isomerase [EC:5.3.1.24]	EMQU_1222	1285254	1285757	-	38.2937	48.2332	18.4863	84.4226	0.38327	1.7503
	ASCH protein	InterPro: IPR007374: ASCH domain; IPR009326: Protein of unknown function DUF984; IPR015947: PUA-like domain	EMQU_1223	1286008	1286496	+	38.0368	268.449	192.651	87.0123	0.717646	0.32413
	GNAT family acetyltransferase	InterPro: IPR000182: GCN5-related N-acetyltransferase (GNAT) domain; IPR016181: Acyl-CoA N-acyltransferase	EMQU_1224	1286570	1286944	+	38.1333	173.732	356.121	159.641	2.04983	0.918893
	hypothetical protein		EMQU_1225	1287120	1287311	+	37.5	172.192	183.323	213.879	1.06464	1.24209
	acetyltransferase (GNAT) family protein	KO: K03826; InterPro: IPR000182: GCN5-related N-acetyltransferase (GNAT) domain; IPR016181: Acyl-CoA N-acyltransferase	EMQU_1226	1287336	1287782	+	31.9911	105.504	79.9007	108.47	0.757321	1.02811
	transcriptional regulator		EMQU_1227	1287994	1288248	-	38.4314	59.1055	12.1792	0	0.206059	0
	transcriptional regulator	InterPro: IPR001387: Helix-turn-helix type 3; IPR010982: Lambda repressor-like, DNA-binding	EMQU_1228	1288270	1288452	-	32.2404	69.0762	16.9711	0	0.245686	0
arsC2	arsenate reductase	KO: K03741; InterPro: IPR014064: Arsenate reductase ArsC; IPR017867: Protein-tyrosine phosphatase, low molecular weight; IPR023485: Phosphotyrosine protein phosphatase I superfamily	EMQU_1229	1288719	1289129	+	39.6594	140.77	197.727	68.6158	1.40461	0.48743
	hypothetical protein	InterPro: IPR012550: Protein of unknown function DUF1706	EMQU_1230	1289491	1290021	+	38.6064	112.62	153.043	81.9934	1.35893	0.728051
	aggregation promoting factor	InterPro: IPR002482: Peptidoglycan-binding Lysin subgroup; IPR018392: Peptidoglycan-binding lysin domain	EMQU_1231	1290107	1290703	-	43.0486	13.8446	21.6758	19.0609	1.56565	1.37678
	universal stress protein	InterPro: IPR006015: Universal stress protein A; IPR006016: UspA; IPR014729: Rossmann-like alpha/beta/alpha sandwich fold	EMQU_1232	1291045	1291479	+	38.8506	114.003	132.082	163.781	1.15858	1.43664
	glucose uptake protein		EMQU_1233	1291553	1291807	-	34.902	64.8254	0	56.2663	0	0.867968
	hypothetical protein		EMQU_1234	1291978	1292241	+	32.5758	136.281	66.6628	239.882	0.489158	1.7602
	hypothetical protein		EMQU_1235	1292264	1292452	+	38.6243	262.389	106.81	337.69	0.407068	1.28699
	hypothetical protein		EMQU_1236	1292616	1292801	-	30.6452	1066.48	30.6118	468.156	0.0287035	0.438972
	hypothetical protein	InterPro: IPR006542: Conserved hypothetical protein CHP01655	EMQU_1237	1292961	1293332	+	37.6344	37.9019	11.1316	59.8495	0.293694	1.57906
	hypothetical protein		EMQU_1238	1293425	1293847	-	39.9527	103.445	40.3815	102.928	0.390368	0.995004
	family C39 peptidase	InterPro: IPR016997: Uncharacterised conserved protein UCP032442	EMQU_1239	1293907	1294656	-	41.3333	73.901	36.5783	37.6014	0.494964	0.508809
	hypothetical protein		EMQU_1240	1294928	1295125	+	34.3434	88.3983	151.625	264.869	1.71525	2.99632
	hypothetical protein		EMQU_1241	1295366	1295854	+	37.4233	148.144	128.081	53.6238	0.864573	0.361971
	nitroreductase family protein	KO: K07078; InterPro: IPR000415: Nitroreductase-like	EMQU_1242	1295923	1296519	-	38.6935	59.4504	47.6867	43.0943	0.802125	0.724878
ptr2	POT family proton (H+)-dependent oligopeptide transporter	KO: K03305; InterPro: IPR000109: Oligopeptide transporter; IPR005279: Amino acid/peptide transporter family; IPR016196: Major facilitator superfamily domain, general substrate transporter; IPR018456: PTR2 family proton/oligopeptide symporter, conserved site; IPR020846: Major facilitator superfamily domain	EMQU_1243	1296892	1298355	+	42.4863	149.776	35.7099	25.3461	0.238422	0.169227
addB	ATP-dependent deoxyribonuclease, subunit B	InterPro: IPR014141: DNA helicase subunit RexB	EMQU_1244	1298498	1302028	+	41.7445	290.668	282.483	292.426	0.971842	1.00605
addA	ATP-dependent deoxyribonuclease, subunit A	InterPro: IPR000212: DNA helicase, UvrD/REP type; IPR011335: Restriction endonuclease, type II-like; IPR011604: Exonuclease, phage-type/RecB, C-terminal; IPR014016: Helicase, superfamily 1, UvrD-related; IPR014017: DNA helicase, UvrD-like, C-terminal; IPR014152: DNA helicase subunit AddA	EMQU_1245	1302025	1305744	+	41.8817	287.009	259.783	336.221	0.905137	1.17146
	hypothetical protein	InterPro: IPR002577: Helix-turn-helix, HxlR type; IPR011991: Winged helix-turn-helix transcription repressor DNA-binding	EMQU_1246	1305811	1306152	+	40.6433	491.877	111.999	280.651	0.227697	0.570572
pheS_2	phenylalanyl-tRNA synthetase subunit alpha	KO: K01889: phenylalanyl-tRNA synthetase alpha chain [EC:6.1.1.20]; InterPro: IPR002319: Phenylalanyl-tRNA synthetase; IPR004188: Phenylalanyl-tRNA synthetase, class II, N-terminal; IPR004529: Phenylalanyl-tRNA synthetase, class IIc, alpha subunit; IPR006195: Aminoacyl-tRNA synthetase, class II; IPR010978: tRNA-binding arm; IPR022911: Phenylalanyl-tRNA synthetase alpha chain 1, bacterial	EMQU_1247	1306461	1307504	+	42.9119	161.598	129.404	80.0898	0.80078	0.495612
pheT	phenylalanyl-tRNA synthetase subunit beta	KO: K01890: phenylalanyl-tRNA synthetase beta chain [EC:6.1.1.20]; InterPro: IPR002547: tRNA-binding domain; IPR004532: Phenylalanyl-tRNA synthetase, class IIc, beta subunit, bacterial; IPR005121: Phenylalanyl-tRNA synthetase, beta subunit, ferrodoxin-fold anticodon-binding; IPR005146: B3/B4 tRNA-binding domain; IPR005147: tRNA synthetase, B5-domain; IPR009061: DNA binding domain, putative; IPR01…	EMQU_1248	1307509	1309929	+	42.7922	412.288	193.064	340.055	0.468275	0.8248
trpS	tryptophan--tRNA ligase	KO: K01867: tryptophanyl-tRNA synthetase [EC:6.1.1.2]; InterPro: IPR001412: Aminoacyl-tRNA synthetase, class I, conserved site; IPR002305: Aminoacyl-tRNA synthetase, class Ic; IPR002306: Tryptophanyl-tRNA synthetase; IPR014729: Rossmann-like alpha/beta/alpha sandwich fold	EMQU_1249	1310000	1311013	-	42.4063	124.185	15.3141	11.7102	0.123317	0.0942966
glnQ	glutamate ABC superfamily ATP binding cassette transporter, ABC protein	KO: K10041: putative glutamine transport system ATP-binding protein [EC:3.6.3.-]; InterPro: IPR003439: ABC transporter-like; IPR003593: ATPase, AAA+ type, core; IPR017871: ABC transporter, conserved site	EMQU_1250	1311267	1312004	+	38.7534	156.134	54.7075	48.2689	0.350388	0.30915
	glutamine-binding periplasmic protein	KO: K10039: putative glutamine transport system substrate-binding protein; InterPro: IPR001320: Ionotropic glutamate receptor; IPR001638: Extracellular solute-binding protein, family 3	EMQU_1251	1312018	1312833	+	41.6667	158.489	67.2395	181.289	0.424255	1.14386
glnC	glutamate ABC superfamily ATP binding cassette transporter, membrane protein	KO: K10040: putative glutamine transport system permease protein; InterPro: IPR000515: Binding-protein-dependent transport systems inner membrane component; IPR010065: Amino acid ABC transporter, permease protein, 3-TM domain, His/Glu/Gln/Arg/opine family	EMQU_1252	1312846	1313493	+	38.1173	153.81	52.7203	71.0066	0.342762	0.461651
	glutamine transport system permease protein GlnP	KO: K02029; InterPro: IPR000515: Binding-protein-dependent transport systems inner membrane component; IPR010065: Amino acid ABC transporter, permease protein, 3-TM domain, His/Glu/Gln/Arg/opine family	EMQU_1253	1313508	1314164	+	39.2694	95.4621	154.419	42.171	1.61759	0.441756
murI	glutamate racemase	KO: K01776: glutamate racemase [EC:5.1.1.3]; InterPro: IPR001920: Asp/Glu racemase; IPR004391: Glutamate racemase; IPR015942: Asp/Glu/hydantoin racemase; IPR018187: Asp/Glu racemase, active site	EMQU_1254	1314386	1315204	+	42.8571	205.399	190.235	39.2663	0.926174	0.191171
	ribonuclease PH/Ham1 protein	InterPro: IPR001247: Exoribonuclease, phosphorolytic domain 1; IPR002381: Ribonuclease phosphorolytic, bacterial-type; IPR002637: Ham1-like protein; IPR015847: Exoribonuclease, phosphorolytic domain 2; IPR018336: Ribonuclease PH, conserved site; IPR020568: Ribosomal protein S5 domain 2-type fold; IPR020922: Nucleoside-triphosphatase	EMQU_1255	1315201	1316556	+	43.6578	341.337	335.917	199.946	0.98412	0.585771
	phosphoesterase	KO: K07095; InterPro: IPR000979: Phosphodiesterase MJ0936; IPR024654: Calcineurin-like phosphoesterase superfamily domain	EMQU_1256	1316557	1317069	+	41.5205	558.219	500.464	524.653	0.896538	0.939871
	hypothetical protein	InterPro: IPR000644: Cystathionine beta-synthase, core	EMQU_1257	1317176	1317682	+	36.4892	370.157	314.45	285.924	0.849505	0.77244
	mscS family small conductance mechanosenstive ion channel protein	KO: K03442; InterPro: IPR006685: Mechanosensitive ion channel MscS; IPR010920: Like-Sm ribonucleoprotein (LSM)-related domain; IPR011014: Mechanosensitive ion channel MscS, transmembrane-2; IPR011066: Mechanosensitive ion channel MscS, C-terminal	EMQU_1258	1317962	1318879	-	38.3442	108.572	25.9373	172.464	0.238895	1.58848
	branched-chain amino acid aminotransferase	KO: K00826: branched-chain amino acid aminotransferase [EC:2.6.1.42]; InterPro: IPR001544: Aminotransferase, class IV; IPR005786: Branched-chain amino acid aminotransferase II; IPR018300: Aminotransferase, class IV, conserved site	EMQU_1259	1319057	1320070	+	43.5897	269.946	235.837	221.518	0.873647	0.820601
	enoyl-ACP reductase	KO: K00208: enoyl-[acyl-carrier protein] reductase I [EC:1.3.1.9 1.3.1.10]; InterPro: IPR002198: Short-chain dehydrogenase/reductase SDR; IPR002347: Glucose/ribitol dehydrogenase; IPR016040: NAD(P)-binding domain	EMQU_1260	1320137	1320892	-	42.5926	707.42	488.861	504.572	0.691048	0.713257
	(3R)-hydroxymyristoyl-[acyl-carrier-protein] dehydratase 1	KO: K02372: 3-hydroxyacyl-[acyl-carrier-protein] dehydratase [EC:4.2.1.59]; InterPro: IPR010084: Beta-hydroxyacyl-(acyl-carrier-protein) dehydratase FabZ; IPR013114: Beta-hydroxyacyl-(acyl-carrier-protein) dehydratase, FabA/FabZ	EMQU_1261	1321103	1321543	+	39.4558	625.102	167.844	429.686	0.268507	0.687385
	cyclophilin type peptidyl-prolyl cis-trans isomerase	KO: K03767; InterPro: IPR002130: Cyclophilin-like peptidyl-prolyl cis-trans isomerase domain; IPR020892: Cyclophilin-type peptidyl-prolyl cis-trans isomerase, conserved site	EMQU_1262	1321988	1322740	-	41.1687	156.252	26.8089	157.691	0.171574	1.00921
	hypothetical protein	KO: K09963; InterPro: IPR002130: Cyclophilin-like peptidyl-prolyl cis-trans isomerase domain; IPR008589: Protein of unknown function DUF871, prokaryotic; IPR013785: Aldolase-type TIM barrel; IPR017853: Glycoside hydrolase, superfamily	EMQU_1263	1322927	1324018	+	37.9121	217.717	90.5356	198.899	0.415841	0.913566
	family S9 peptidase	KO: K06889	EMQU_1264	1324173	1325105	+	41.1576	193.33	107.074	108.708	0.553842	0.562295
obg	obg family GTPase CgtA	KO: K03979; InterPro: IPR005225: Small GTP-binding protein domain; IPR006073: GTP binding domain; IPR006074: GTP1/OBG, conserved site; IPR006169: GTP1/OBG domain; IPR014100: GTP-binding protein Obg/CgtA; IPR015349: GTP-binding protein GTP1/OBG, C-terminal	EMQU_1265	1325357	1326670	+	45.7382	228.295	205.235	97.1438	0.89899	0.425519
	hypothetical protein		EMQU_1266	1326935	1327522	+	43.0272	797.088	1038.76	708.477	1.30319	0.888832
rnz	ribonuclease Z	KO: K00784: ribonuclease Z [EC:3.1.26.11]; InterPro: IPR013471: Ribonuclease Z	EMQU_1267	1327674	1328615	+	39.5966	959.994	1147.33	794.656	1.19514	0.827771
	short chain dehydrogenase/reductase family oxidoreductase	KO: K07124; InterPro: IPR002198: Short-chain dehydrogenase/reductase SDR; IPR002347: Glucose/ribitol dehydrogenase; IPR016040: NAD(P)-binding domain; IPR020904: Short-chain dehydrogenase/reductase, conserved site	EMQU_1268	1328612	1329400	+	40.6844	912.609	1456.41	765.649	1.59588	0.838967
	hypothetical protein	InterPro: IPR010445: Protein of unknown function DUF1049	EMQU_1269	1329410	1329844	+	36.7816	754.434	986.448	999.748	1.30753	1.32516
recJ	single-stranded-DNA-specific exonuclease RecJ	KO: K07462: single-stranded-DNA-specific exonuclease [EC:3.1.-.-]; InterPro: IPR001667: Phosphoesterase, RecJ-like; IPR003156: Phosphoesterase, DHHA1; IPR004610: Bacterial RecJ exonuclease; IPR018779: Single-stranded-DNA-specific exonuclease RecJ, C-terminal	EMQU_1270	1330079	1332376	+	41.6884	278.428	160.151	122.72	0.575196	0.440761
apt	adenine phosphoribosyltransferase	KO: K00759: adenine phosphoribosyltransferase [EC:2.4.2.7]; InterPro: IPR000836: Phosphoribosyltransferase; IPR005764: Adenine phosphoribosyl transferase	EMQU_1271	1332391	1332903	+	42.4951	181.018	236.106	107.052	1.30432	0.59139
	hypothetical protein		EMQU_1272	1333108	1333326	-	36.5297	146.523	21.2719	2.25916	0.145178	0.0154184
	lexA repressor	KO: K01356; InterPro: IPR006197: Peptidase S24, LexA-like; IPR006199: LexA repressor, DNA-binding domain; IPR006200: Peptidase S24, LexA repressor; IPR011056: Peptidase S24/S26A/S26B/S26C, beta-ribbon domain; IPR011991: Winged helix-turn-helix transcription repressor DNA-binding; IPR015927: Peptidase S24/S26A/S26B/S26C; IPR019759: Peptidase S24/S26A/S26B	EMQU_1273	1333503	1334126	-	44.8718	179.205	81.2925	329.837	0.453629	1.84056
	hypothetical protein	InterPro: IPR009242: Uncharacterised protein family UPF0291; IPR023218: UPF0291 structural domain	EMQU_1274	1334278	1334529	+	39.6825	252.742	390.267	139.395	1.54413	0.551533
tktA_1	transketolase	KO: K00615: transketolase [EC:2.2.1.1]; InterPro: IPR005474: Transketolase, N-terminal; IPR005475: Transketolase-like, pyrimidine-binding domain; IPR005476: Transketolase, C-terminal; IPR005478: Transketolase, bacterial-like; IPR009014: Transketolase, C-terminal/Pyruvate-ferredoxin oxidoreductase, domain II; IPR015941: Transketolase-like, C-terminal; IPR020826: Transketolase binding site	EMQU_1275	1334628	1336622	+	45.614	120.146	201.079	116.807	1.67362	0.972206
	N-acetylmuramoyl-L-alanine amidase	InterPro: IPR002482: Peptidoglycan-binding Lysin subgroup; IPR002901: Mannosyl-glycoprotein endo-beta-N-acetylglucosamidase; IPR013338: Lysozyme domain, subfamily 2; IPR018392: Peptidoglycan-binding lysin domain	EMQU_1276	1336880	1337749	+	40.2299	349.275	245.125	274.675	0.70181	0.786415
	cysteine synthase A	KO: K01738: cysteine synthase A [EC:2.5.1.47]; InterPro: IPR001216: Cysteine synthase/cystathionine beta-synthase P-phosphate-binding site; IPR001926: Pyridoxal phosphate-dependent enzyme, beta subunit; IPR005856: Cysteine synthase K/M; IPR005859: Cysteine synthase A	EMQU_1277	1337883	1338809	+	43.2578	426.4	386.398	400.822	0.906187	0.940013
fur2	fur family transcriptional regulator	KO: K09825; InterPro: IPR002481: Ferric-uptake regulator	EMQU_1278	1339150	1339416	+	36.3296	81.9422	3.87728	3.70604	0.0473173	0.0452274
	NADH oxidase	KO: K00356: NADH dehydrogenase [EC:1.6.99.3]; InterPro: IPR004099: Pyridine nucleotide-disulphide oxidoreductase, dimerisation; IPR013027: FAD-dependent pyridine nucleotide-disulphide oxidoreductase; IPR016156: FAD/NAD-linked reductase, dimerisation; IPR023753: Pyridine nucleotide-disulphide oxidoreductase, FAD/NAD(P)-binding domain	EMQU_1279	1339789	1341141	+	38.4331	2097.12	1600.29	1318.98	0.763089	0.628949
	hypothetical protein		EMQU_1280	1341402	1341692	+	35.0515	170.417	209.893	200.623	1.23164	1.17724
dnaD	DNA replication protein DnaD	KO: K02086; InterPro: IPR006343: Replication protein, DnaD/DnaB domain	EMQU_1281	1341930	1342634	+	36.5957	240.682	95.4472	108.074	0.39657	0.449035
	endonuclease III	KO: K10773: endonuclease III [EC:4.2.99.18]; InterPro: IPR000445: Helix-hairpin-helix motif; IPR003265: HhH-GPD domain; IPR003651: Endonuclease III-like, iron-sulphur cluster loop motif; IPR004035: Endonuclease III, iron-sulphur binding site; IPR004036: Endonuclease III, conserved site-2; IPR005759: Endonuclease III/Nth; IPR011257: DNA glycosylase; IPR023170: Helix-turn-helix, base-excision DNA r…	EMQU_1282	1342636	1343301	+	40.0901	209.515	190.415	239.949	0.908838	1.14526
	putative lipoprotein	InterPro: IPR016878: Uncharacterised conserved protein UCP028288	EMQU_1283	1343774	1344349	+	40.625	80.1877	35.9457	0.858951	0.448269	0.0107118
	unnamed protein product	InterPro: IPR007737: M trans-acting positive regulator	EMQU_1284	1344891	1346387	+	31.9305	35.4006	185.333	102.454	5.23529	2.89414
	chitin binding protein	KO: K03933; InterPro: IPR003610: Carbohydrate-binding module family 5/12; IPR003961: Fibronectin, type III; IPR004302: Chitin-binding, domain 3; IPR013783: Immunoglobulin-like fold; IPR014756: Immunoglobulin E-set	EMQU_1285	1346678	1348000	+	40.0605	81.583	266.829	32.9089	3.27065	0.40338
	transcriptional regulator	InterPro: IPR007737: M trans-acting positive regulator; IPR011991: Winged helix-turn-helix transcription repressor DNA-binding; IPR013196: Helix-turn-helix, type 11	EMQU_1286	1348324	1349784	+	31.896	48.253	30.8232	14.5616	0.638783	0.301776
	hypothetical protein		EMQU_1287	1349820	1350146	+	37.9205	62.4465	79.1464	39.3384	1.26743	0.629954
	conjugal transfer protein	InterPro: IPR003688: Ti-type conjugative transfer system, TraG-like	EMQU_1288	1350152	1351558	+	36.2473	104.011	26.8558	65.7565	0.258201	0.632207
	permease		EMQU_1289	1351561	1351797	+	38.8186	96.4175	0	2.08758	0	0.0216514
	hypothetical protein	InterPro: IPR007688: Conjugal transfer, TrbL/VirB6	EMQU_1290	1351826	1352650	+	36.3636	77.2012	31.3707	13.1935	0.406351	0.170898
	hypothetical protein	InterPro: IPR024414: Uncharacterised protein family PrgI	EMQU_1291	1352666	1353016	+	37.6068	123.279	4.42408	129.68	0.0358867	1.05192
	trsE protein		EMQU_1292	1352958	1355267	+	35.1948	30.9394	6.27415	42.6218	0.202788	1.37759
	hypothetical protein		EMQU_1293	1355260	1355832	+	30.192	41.5765	19.8736	39.7186	0.478001	0.955314
	putative secreted cell wall protein	InterPro: IPR007921: Cysteine, histidine-dependent amidohydrolase/peptidase; IPR023346: Lysozyme-like domain	EMQU_1294	1356047	1358599	+	37.6812	59.6074	6.69071	29.4567	0.112246	0.494178
	hypothetical protein		EMQU_1295	1358619	1359548	+	35.6989	64.3026	20.0368	26.5998	0.311602	0.413666
	hypothetical protein		EMQU_1296	1359588	1364270	+	41.0634	97.6949	34.8173	108.819	0.356388	1.11386
	Cell surface protein with LPXTG-motif		EMQU_1297	1364291	1366867	+	43.3062	67.1648	54.634	69.692	0.813432	1.03763
	hypothetical protein		EMQU_1298	1366898	1367458	+	33.5116	60.6655	3.69068	77.6088	0.0608365	1.27929
	hypothetical protein		EMQU_1299	1367505	1367678	+	39.0805	103.385	47.597	65.3988	0.460384	0.632573
	hypothetical protein		EMQU_1300	1367753	1368286	+	35.5805	77.3899	9.69321	34.2808	0.125252	0.442963
	hypothetical protein		EMQU_1301	1368301	1368963	+	34.0875	68.932	15.6144	67.1614	0.226519	0.974314
	hypothetical protein	InterPro: IPR005046: Protein of unknown function DUF285, lipoprotein predicted; IPR011889: Bacterial surface protein 26-residue repeat	EMQU_1302	1369089	1372049	+	41.5738	80.2929	7.5169	81.039	0.0936186	1.00929
	hypothetical protein		EMQU_1303	1372104	1372628	+	40.381	147.246	64.086	9.42392	0.43523	0.0640011
	hypothetical protein		EMQU_1304	1372653	1373216	+	40.6028	43.102	64.2433	43.8613	1.49049	1.01762
	hypothetical protein		EMQU_1305	1373222	1373593	+	34.6774	31.3671	48.7006	2.65998	1.5526	0.0848014
	penicillin-binding protein 1A	KO: K05366: penicillin-binding protein 1A [EC:2.4.1.- 3.4.-.-]; InterPro: IPR001264: Glycosyl transferase, family 51; IPR001460: Penicillin-binding protein, transpeptidase; IPR011816: Penicillin-binding protein 1A; IPR012338: Beta-lactamase/transpeptidase-like	EMQU_1306	1373682	1376072	-	43.1619	199.275	266.277	123.12	1.33623	0.617839
recU	holliday junction-specific endonuclease	KO: K03700; InterPro: IPR004612: Resolvase, Holliday junction-type, RecU; IPR011335: Restriction endonuclease, type II-like	EMQU_1307	1376062	1376703	-	38.9408	159.792	61.2756	23.8901	0.383472	0.149508
	hypothetical protein	InterPro: IPR010697: Uncharacterised conserved protein UPF0398; IPR024718: Domain of unknown function DUF1273	EMQU_1308	1376768	1377307	+	36.6667	117.046	134.197	135.6	1.14653	1.15852
	cell division protein GpsB	InterPro: IPR007793: DivIVA; IPR011229: Cell cycle protein GpsB; IPR019933: DivIVA domain	EMQU_1309	1377397	1377810	+	35.0242	1357.58	1192.77	1049.26	0.878603	0.772896
	site-specific DNA-methyltransferase	KO: K07444; InterPro: IPR000241: Putative RNA methylase; IPR002052: DNA methylase, N-6 adenine-specific, conserved site; IPR004114: THUMP	EMQU_1310	1378498	1379667	+	43.2479	540.212	891.452	621.616	1.65019	1.15069
	hypothetical protein	InterPro: IPR007374: ASCH domain; IPR009326: Protein of unknown function DUF984; IPR015947: PUA-like domain	EMQU_1311	1379749	1380216	+	39.7436	500.735	781.956	397.496	1.56162	0.793826
	thermostable carboxypeptidase 1	KO: K01299; InterPro: IPR001333: Peptidase M32, carboxypeptidase Taq metallopeptidase	EMQU_1312	1380277	1381779	+	38.3234	561.238	781.42	878.578	1.39231	1.56543
	metal-dependent phosphohydrolase	KO: K06950; InterPro: IPR003607: Metal-dependent phosphohydrolase, HD domain; IPR006674: Metal-dependent phosphohydrolase, HD subdomain; IPR023279: HD domain	EMQU_1313	1381810	1382484	+	41.4815	653.296	812.084	502.086	1.24306	0.768542
	hypothetical protein		EMQU_1314	1382662	1382985	-	34.8765	207.081	137.392	177.135	0.663471	0.855388
	vanZ/RDD domain protein	InterPro: IPR006976: VanZ-like; IPR010432: RDD; IPR021192: Uncharacterised conserved protein UCP031578, VanZ/RDD-type	EMQU_1315	1383113	1384258	+	39.0925	81.456	85.3662	13.3834	1.048	0.164303
rhlB	ATP-dependent RNA helicase	InterPro: IPR001650: Helicase, C-terminal; IPR011545: DNA/RNA helicase, DEAD/DEAH box type, N-terminal; IPR014001: DEAD-like helicase; IPR014014: RNA helicase, DEAD-box type, Q motif	EMQU_1316	1384334	1385683	+	39.5556	178.99	220.083	67.7999	1.22958	0.378791
	N-acetyltransferase GCN5	KO: K00680: [EC:2.3.1.-]; InterPro: IPR000182: GCN5-related N-acetyltransferase (GNAT) domain; IPR016181: Acyl-CoA N-acyltransferase	EMQU_1317	1385791	1386219	-	40.5594	69.132	1.20657	25.3721	0.0174531	0.36701
	alanyl-tRNA synthetase	KO: K01872: alanyl-tRNA synthetase [EC:6.1.1.7]; InterPro: IPR002318: Alanyl-tRNA synthetase, class IIc; IPR003156: Phosphoesterase, DHHA1; IPR012947: Threonyl/alanyl tRNA synthetase, SAD; IPR018162: Alanyl-tRNA synthetase, class IIc, anti-codon-binding domain; IPR018163: Threonyl/alanyl tRNA synthetase, class II-like, putative editing domain; IPR018164: Alanyl-tRNA synthetase, class IIc, N-termi…	EMQU_1318	1386579	1389221	+	40.8627	309.779	115.94	276.3	0.374267	0.891926
	integral membrane protein	InterPro: IPR024529: ECF transporter, substrate-specific component	EMQU_1319	1389389	1389985	+	43.5511	103.427	45.0856	164.919	0.435915	1.59453
	hypothetical protein	InterPro: IPR002524: Cation efflux protein	EMQU_1320	1390024	1391163	+	39.2105	150.548	74.4643	95.4792	0.49462	0.634209
	hypothetical protein	KO: K03469: ribonuclease HI [EC:3.1.26.4]; InterPro: IPR002156: Ribonuclease H domain; IPR012337: Ribonuclease H-like domain	EMQU_1321	1392095	1392490	-	32.3232	52.7934	31.3707	0	0.594217	0
	ebsA protein	InterPro: IPR020215: Pore-forming protein, EbsA	EMQU_1322	1392566	1393003	+	32.8767	59.9413	69.7247	11.2958	1.16322	0.188448
cspC	cspC family cold shock transcriptional regulator	KO: K03704; InterPro: IPR002059: Cold-shock protein, DNA-binding; IPR011129: Cold shock protein; IPR012156: Cold shock, CspA; IPR012340: Nucleic acid-binding, OB-fold; IPR016027: Nucleic acid-binding, OB-fold-like; IPR019844: Cold-shock conserved site	EMQU_1323	1393112	1393324	-	37.0892	155.216	177.399	25.5508	1.14292	0.164615
fhs	formate--tetrahydrofolate ligase	KO: K01938: formate--tetrahydrofolate ligase [EC:6.3.4.3]; InterPro: IPR000559: Formate-tetrahydrofolate ligase, FTHFS; IPR020628: Formate-tetrahydrofolate ligase, FTHFS, conserved site	EMQU_1324	1393504	1395174	+	40.9934	326.746	252.458	103.037	0.772645	0.315344
	hypothetical protein EpC_10100		EMQU_1325	1395429	1402667	+	37.74	50.7078	25.4554	44.6299	0.502002	0.880138
	hypothetical protein		EMQU_1326	1402921	1404102	+	41.2014	61.6993	18.8304	59.8562	0.305197	0.970128
	hypothetical protein		EMQU_1327	1404089	1404724	+	36.6352	16.8179	4.06932	48.2309	0.241963	2.86783
	hypothetical protein		EMQU_1328	1404745	1404945	+	36.8159	118.524	0	2.46147	0	0.0207677
	hypothetical protein RUMHYD_01613	KO: K07729; InterPro: IPR001387: Helix-turn-helix type 3; IPR010982: Lambda repressor-like, DNA-binding	EMQU_1329	1405266	1405475	+	38.5714	62.5102	0	73.0354	0	1.16838
	hypothetical protein CLOSS21_02826		EMQU_1330	1405462	1405953	+	34.3496	61.2679	69.4365	105.588	1.13333	1.72338
	hypothetical protein		EMQU_1331	1406050	1406433	+	36.7188	168.394	118.621	45.0949	0.704423	0.267794
	hypothetical protein	InterPro: IPR000644: Cystathionine beta-synthase, core	EMQU_1332	1406420	1407118	+	41.2017	190.581	171.058	198.185	0.897561	1.0399
lspA	signal peptidase II	KO: K03101: signal peptidase II [EC:3.4.23.36]; InterPro: IPR001872: Peptidase A8, signal peptidase II	EMQU_1333	1407123	1407587	+	38.2796	150.562	151.389	81.9273	1.00549	0.544143
rluD	pseudouridylate synthase	KO: K06180; InterPro: IPR002942: RNA-binding S4; IPR006145: Pseudouridine synthase, RsuA and RluB/C/D/E/F; IPR006224: Pseudouridine synthase, RluC/RluD, conserved site; IPR006225: Pseudouridine synthase, RluC/RluD; IPR020103: Pseudouridine synthase, catalytic domain	EMQU_1334	1407584	1408495	+	40.8991	217.506	219.647	97.6492	1.00984	0.448949
	hypothetical protein		EMQU_1335	1408555	1408677	-	48.7805	63.2443	117.832	100.56	1.86312	1.59003
pyrR	pyrimidine operon attenuation protein	KO: K02825: pyrimidine operon attenuation protein / uracil phosphoribosyltransferase [EC:2.4.2.9]; InterPro: IPR000836: Phosphoribosyltransferase; IPR023050: Bifunctional protein PyrR	EMQU_1336	1408733	1409275	+	40.884	120.876	485.207	18.2231	4.01408	0.150758
pyrP	NCS2 family uracil:cation symporter-2	KO: K02824; InterPro: IPR006042: Xanthine/uracil permease; IPR006043: Xanthine/uracil/vitamin C permease	EMQU_1337	1409290	1410573	+	44.2368	109.431	620.818	54.716	5.67316	0.500006
pyrB	aspartate carbamoyltransferase catalytic subunit	KO: K00609: aspartate carbamoyltransferase catalytic subunit [EC:2.1.3.2]; InterPro: IPR002082: Aspartate carbamoyltransferase, eukaryotic; IPR006130: Aspartate/ornithine carbamoyltransferase; IPR006131: Aspartate/ornithine carbamoyltransferase, Asp/Orn-binding domain; IPR006132: Aspartate/ornithine carbamoyltransferase, carbamoyl-P binding	EMQU_1338	1410586	1411512	+	41.3161	144.231	560.054	104.075	3.88303	0.721583
pyrC	dihydroorotase	KO: K01465: dihydroorotase [EC:3.5.2.3]; InterPro: IPR002195: Dihydroorotase, conserved site; IPR004722: Dihydroorotase; IPR006680: Amidohydrolase 1; IPR011059: Metal-dependent hydrolase, composite domain	EMQU_1339	1411533	1412813	+	44.1062	151.436	432.762	194.272	2.85772	1.28286
carA	carbamoyl-phosphate synthase (glutamine-hydrolyzing), small subunit	KO: K01956: carbamoyl-phosphate synthase small subunit [EC:6.3.5.5]; InterPro: IPR002474: Carbamoyl-phosphate synthase, small subunit N-terminal domain; IPR006274: Carbamoyl-phosphate synthase, small subunit; IPR017926: Glutamine amidotransferase type 1	EMQU_1340	1412818	1413897	+	43.4259	222.387	485.027	100.325	2.181	0.45113
carB	carbamoyl phosphate synthase large subunit	KO: K01955: carbamoyl-phosphate synthase large subunit [EC:6.3.5.5]; InterPro: IPR005479: Carbamoyl-phosphate synthetase, large subunit, ATP-binding; IPR005480: Carbamoyl-phosphate synthetase, large subunit oligomerisation domain; IPR005481: Carbamoyl-phosphate synthase, large subunit, N-terminal; IPR005483: Carbamoyl-phosphate synthase, large subunit, CPS-domain; IPR006275: Carbamoyl-phosphate s…	EMQU_1341	1413897	1417082	+	44.0364	360.446	216.892	191.629	0.601733	0.531643
pyrK	dihydroorotate oxidase electron transfer subunit	KO: K02823; InterPro: IPR001433: Oxidoreductase FAD/NAD(P)-binding; IPR008333: Oxidoreductase, FAD-binding domain; IPR012165: Cytochrome-c3 hydrogenase, gamma subunit; IPR017927: Ferredoxin reductase-type FAD-binding domain; IPR017938: Riboflavin synthase-like beta-barrel; IPR019480: Dihydroorotate dehydrogenase, electron transfer subunit, iron-sulphur cluster binding domain; IPR023455: Dihydroor…	EMQU_1342	1417168	1417944	+	44.2728	260.928	173.871	308.824	0.666357	1.18356
	dihydroorotate dehydrogenase	KO: K00226: dihydroorotate dehydrogenase (fumarate) [EC:1.3.98.1]; InterPro: IPR001295: Dihydroorotate dehydrogenase, conserved site; IPR005720: Dihydroorotate dehydrogenase domain; IPR012135: Dihydroorotate dehydrogenase, class 1/ 2; IPR013785: Aldolase-type TIM barrel; IPR024920: Dihydroorotate dehydrogenase, class 1	EMQU_1343	1417941	1418870	+	46.3441	329.355	210.386	334.625	0.638783	1.016
	orotidine 5'-phosphate decarboxylase	KO: K01591: orotidine-5'-phosphate decarboxylase [EC:4.1.1.23]; InterPro: IPR001754: Orotidine 5'-phosphate decarboxylase domain; IPR011060: Ribulose-phosphate binding barrel; IPR013785: Aldolase-type TIM barrel; IPR014732: Orotidine 5'-phosphate decarboxylase; IPR018089: Orotidine 5'-phosphate decarboxylase, active site	EMQU_1344	1418867	1419577	+	44.0225	262.584	211.852	411.253	0.806797	1.56618
pyrE	orotate phosphoribosyltransferase	KO: K00762: orotate phosphoribosyltransferase [EC:2.4.2.10]; InterPro: IPR000836: Phosphoribosyltransferase; IPR004467: Orotate phosphoribosyl transferase, clade 1; IPR023031: Orotate phosphoribosyltransferase	EMQU_1345	1419581	1420213	+	41.3902	291.1	89.9493	160.229	0.308998	0.550426
	HAD superfamily hydrolase	KO: K07023; InterPro: IPR023279: HD domain	EMQU_1346	1420410	1421051	+	39.0966	437.723	250.746	201.91	0.572842	0.461273
	carbonate dehydratase	KO: K01674: carbonic anhydrase [EC:4.2.1.1]; InterPro: IPR001148: Alpha carbonic anhydrase; IPR023561: Carbonic anhydrase, alpha-class	EMQU_1347	1421093	1421794	+	42.3077	586.614	439.459	392.563	0.749144	0.6692
	lysR family transcriptional regulator	InterPro: IPR000847: Transcription regulator HTH, LysR; IPR005119: LysR, substrate-binding; IPR011991: Winged helix-turn-helix transcription repressor DNA-binding	EMQU_1348	1421791	1422693	+	39.9779	369.892	577.232	244.912	1.56054	0.662118
	conserved hypothetical protein	InterPro: IPR004991: Clostridium epsilon toxin ETX/Bacillus mosquitocidal toxin MTX2; IPR023307: Aerolysin-like toxin, beta complex domain	EMQU_1349	1422902	1423837	+	41.1325	63.8904	34.8396	1.58576	0.545303	0.0248199
pavA	fibronectin binding protein	InterPro: IPR008532: Domain of unknown function DUF814; IPR008616: Fibronectin-binding A, N-terminal	EMQU_1350	1423915	1425615	-	41.4462	269.82	171.931	265.266	0.637204	0.983122
	hypothetical protein		EMQU_1351	1425808	1426434	+	38.9155	85.2966	66.8692	74.963	0.783961	0.878851
	hypothetical protein	KO: K01989; InterPro: IPR007487: ABC transporter, substrate-binding protein	EMQU_1352	1426857	1427882	+	42.885	502.302	100.396	120.555	0.199871	0.240004
	ABC transporter permease	KO: K05832; InterPro: IPR001851: ABC transporter, permease	EMQU_1353	1427879	1428760	+	40.8163	377.597	188.971	117.799	0.500458	0.31197
	ABC transporter ATP-binding protein	KO: K05833; InterPro: IPR003439: ABC transporter-like; IPR003593: ATPase, AAA+ type, core; IPR017871: ABC transporter, conserved site	EMQU_1354	1428763	1429533	+	41.6342	211.25	85.9339	83.4219	0.406787	0.394896
aroE	shikimate dehydrogenase	KO: K00014: shikimate dehydrogenase [EC:1.1.1.25]; InterPro: IPR006151: Quinate/shikimate 5-dehydrogenase/glutamyl-tRNA reductase; IPR011342: Shikimate dehydrogenase; IPR013708: Shikimate dehydrogenase substrate binding, N-terminal; IPR016040: NAD(P)-binding domain; IPR022893: Shikimate, quinate/shikimate dehydrogenase	EMQU_1355	1429715	1430575	+	41.928	158.111	36.6721	41.9479	0.231939	0.265307
msrR	transcriptional regulator	InterPro: IPR004474: Cell envelope-related transcriptional attenuator	EMQU_1356	1430690	1431838	+	43.255	123.558	77.0344	101.19	0.62347	0.818973
	prevent-host-death protein Phd	InterPro: IPR006442: Bacteriophage P1, prevent-host-death protein	EMQU_1357	1432002	1432265	+	33.3333	31.3077	0	134.933	0	4.30991
	hypothetical protein		EMQU_1358	1432636	1432923	-	35.0694	37.1396	0	36.0759	0	0.971362
	conserved hypothetical protein		EMQU_1359	1432920	1433252	-	32.7327	20.4404	0	0	0	0
	hypothetical protein		EMQU_1360	1433270	1433713	-	32.6577	37.2308	0	0	0	0
	hypothetical protein		EMQU_1361	1434712	1434840	+	39.5349	7.53784	0	0	0	0
	hypothetical protein		EMQU_1362	1434961	1435326	+	32.2404	17.2691	1.41426	0	0.0818953	0
	hypothetical protein		EMQU_1363	1435415	1436038	+	34.7756	56.8781	0	10.3074	0	0.18122
	hypothetical protein		EMQU_1364	1436507	1437127	+	32.6892	59.5016	12.5028	0	0.210126	0
	hypothetical protein		EMQU_1365	1437470	1438012	+	33.8858	16.1168	0	13.6673	0	0.848014
	hypothetical protein EfmE980_2024		EMQU_1366	1438033	1438536	+	32.9365	15.4346	0	0	0	0
	hypothetical protein		EMQU_1367	1438665	1439219	+	32.973	7.88417	3.73058	0	0.473173	0
	hypothetical protein		EMQU_1368	1439238	1439819	+	33.8488	25.0614	39.1326	0	1.56147	0
	hypothetical protein		EMQU_1369	1439931	1440548	-	34.466	26.7483	9.21325	0	0.344442	0
	predicted protein		EMQU_1370	1440674	1441060	-	36.4341	45.227	101.651	2.55688	2.24757	0.0565343
	hypothetical protein EfmE980_2023		EMQU_1371	1441274	1442107	-	44.7242	45.4711	19.8606	10.085	0.436775	0.221788
	hypothetical protein		EMQU_1372	1442236	1442550	-	48.8889	118.847	32.8646	9.42392	0.27653	0.0792949
	topoisomerase	KO: K03169; InterPro: IPR000380: DNA topoisomerase, type IA; IPR003601: DNA topoisomerase, type IA, domain 2; IPR003602: DNA topoisomerase, type IA, DNA-binding; IPR005738: DNA topoisomerase III, bacterial-type; IPR006171: Toprim domain; IPR013497: DNA topoisomerase, type IA, central; IPR013824: DNA topoisomerase, type IA, central region, subdomain 1; IPR013825: DNA topoisomerase, type IA, centra…	EMQU_1373	1442965	1445136	+	41.0681	198.102	178.735	134.851	0.902236	0.680711
	hypothetical protein		EMQU_1374	1445213	1445527	+	39.6825	169.781	128.172	128.794	0.754926	0.758587
	acetyltransferase	KO: K03828; InterPro: IPR000182: GCN5-related N-acetyltransferase (GNAT) domain; IPR016181: Acyl-CoA N-acyltransferase	EMQU_1375	1445564	1446052	-	38.6503	55.6783	4.23409	42.4944	0.0760456	0.763213
	cation transporter E1-E2 family ATPase	InterPro: IPR001757: ATPase, P-type, K/Mg/Cd/Cu/Zn/Na/Ca/Na/H-transporter; IPR004014: ATPase, P-type cation-transporter, N-terminal; IPR006069: ATPase, P-type cation exchange, alpha subunit; IPR008250: ATPase, P-type, ATPase-associated domain; IPR018303: ATPase, P-type phosphorylation site; IPR023298: ATPase, P-type, transmembrane domain; IPR023299: ATPase, P-type, cytoplasmic domain N; IPR023300…	EMQU_1376	1446314	1447453	+	37.0175	31.5597	5.90265	0	0.187031	0
	cation transporter E1-E2 family ATPase	InterPro: IPR000695: ATPase, P-type, H+ transporting proton pump; IPR001757: ATPase, P-type, K/Mg/Cd/Cu/Zn/Na/Ca/Na/H-transporter; IPR005834: Haloacid dehalogenase-like hydrolase; IPR006068: ATPase, P-type cation-transporter, C-terminal; IPR023214: HAD-like domain; IPR023298: ATPase, P-type, transmembrane domain; IPR023299: ATPase, P-type, cytoplasmic domain N; IPR023306: ATPase, cation-transport…	EMQU_1377	1447561	1448853	+	41.8407	60.5388	7.20581	17.9842	0.119028	0.297068
	hypothetical protein		EMQU_1378	1449597	1449770	+	30.4598	0	0	0	#DIV/0!	#DIV/0!
	hypothetical protein		EMQU_1379	1449846	1450085	-	30.8333	40.5159	2.15674	0	0.053232	0
	L-lactate dehydrogenase	KO: K00016: L-lactate dehydrogenase [EC:1.1.1.27]; InterPro: IPR001236: Lactate/malate dehydrogenase, N-terminal; IPR001557: L-lactate/malate dehydrogenase; IPR011304: L-lactate dehydrogenase; IPR015955: Lactate dehydrogenase/glycoside hydrolase, family 4, C-terminal; IPR016040: NAD(P)-binding domain; IPR018177: L-lactate dehydrogenase, active site; IPR022383: Lactate/malate dehydrogenase, C-term…	EMQU_1380	1450201	1451154	-	38.5744	47.9056	0	5.70473	0	0.119083
	hypothetical protein		EMQU_1381	1451291	1451782	-	34.7561	51.386	4.20827	21.1176	0.0818953	0.410961
	hypothetical protein		EMQU_1382	1451779	1452123	-	35.942	40.8682	109.525	30.1156	2.67995	0.736895
	hypothetical protein		EMQU_1383	1452159	1452350	-	30.7292	50.6448	0	54.1139	0	1.0685
	hypothetical protein		EMQU_1384	1452513	1452806	-	39.7959	479.576	829.244	514.95	1.72912	1.07376
bgaB_1	beta-galactosidase	InterPro: IPR013738: Beta-galactosidase trimerisation; IPR013739: Beta-galactosidase C-terminal	EMQU_1385	1452890	1453501	-	39.0523	33.366	67.6624	16.9769	2.02788	0.508809
bgaB_2	beta-galactosidase	KO: K12308: beta-galactosidase [EC:3.2.1.23]; InterPro: IPR013529: Glycoside hydrolase, family 42, N-terminal; IPR013738: Beta-galactosidase trimerisation; IPR013781: Glycoside hydrolase, subgroup, catalytic domain; IPR017853: Glycoside hydrolase, superfamily	EMQU_1386	1453540	1454943	-	42.9487	70.9894	32.4433	31.0103	0.457016	0.436831
	alpha-galactosidase		EMQU_1387	1454940	1455227	-	38.8889	38.8277	3.59457	12.0253	0.0925773	0.30971
	alpha-galactosidase	KO: K07407: alpha-galactosidase [EC:3.2.1.22]; InterPro: IPR000111: Glycoside hydrolase, clan GH-D; IPR002252: Glycoside hydrolase, family 36; IPR013785: Aldolase-type TIM barrel; IPR017853: Glycoside hydrolase, superfamily	EMQU_1388	1455167	1457185	-	41.4562	109.327	38.7123	33.5718	0.354098	0.307078
	hypothetical protein WANG_0187	InterPro: IPR021701: Domain of unknown function DUF3284	EMQU_1389	1457278	1457715	-	39.9543	33.3007	1.18177	51.9607	0.035488	1.56035
	PTS system lactose/cellobiose-specific transporter subunit IIC	InterPro: IPR003352: Phosphotransferase system, EIIC; IPR004501: Phosphotransferase system, lactose/cellobiose IIC component	EMQU_1390	1457728	1459062	-	43.1461	61.5477	61.6488	40.0252	1.00164	0.650312
	galR protein	KO: K02529; InterPro: IPR000843: Transcription regulator HTH, LacI; IPR001761: Periplasmic binding protein/LacI transcriptional regulator; IPR010982: Lambda repressor-like, DNA-binding	EMQU_1391	1459210	1460253	-	41.8582	119.685	26.7733	29.3821	0.223698	0.245495
	dehydrogenase	InterPro: IPR000683: Oxidoreductase, N-terminal; IPR016040: NAD(P)-binding domain	EMQU_1392	1460469	1461506	-	37.3796	117.098	55.3521	31.9351	0.4727	0.272721
rpiR	rpiR family transcriptional regulator	InterPro: IPR000281: Helix-turn-helix protein RpiR; IPR001347: Sugar isomerase (SIS); IPR011991: Winged helix-turn-helix transcription repressor DNA-binding	EMQU_1393	1461719	1462591	+	37.457	25.0614	5.92918	9.63442	0.236586	0.384433
gpmA2_2	phosphoglycerate mutase	KO: K15634: probable phosphoglycerate mutase [EC:5.4.2.1]; InterPro: IPR001345: Phosphoglycerate/bisphosphoglycerate mutase, active site; IPR013078: Histidine phosphatase superfamily, clade-1	EMQU_1394	1462689	1463267	-	39.3782	49.5427	21.4556	68.36	0.433074	1.37982
	transcriptional regulator	InterPro: IPR001647: DNA-binding HTH domain, TetR-type; IPR009057: Homeodomain-like; IPR015893: Tetracycline transcriptional regulator, TetR-like, C-terminal	EMQU_1395	1463527	1464138	-	37.5817	27.805	0	34.7623	0	1.25022
	ABC transporter ATP-binding protein	KO: K02003; InterPro: IPR003439: ABC transporter-like; IPR003593: ATPase, AAA+ type, core; IPR017871: ABC transporter, conserved site	EMQU_1396	1464157	1464837	-	39.3539	102.807	66.1273	51.5825	0.643219	0.501742
	ABC transporter, permease protein	KO: K02004; InterPro: IPR003838: Permease FtsX-like	EMQU_1397	1464845	1465918	-	41.1546	101.403	17.3503	53.4373	0.171103	0.52698
	lipoprotein, putative		EMQU_1398	1466201	1468045	-	45.3659	79.0554	22.4441	56.3137	0.283904	0.712332
	conserved hypothetical protein		EMQU_1399	1468059	1468733	-	40.7407	48.9792	42.9431	11.7275	0.876762	0.239439
	conserved hypothetical protein	InterPro: IPR018966: VTC domain	EMQU_1400	1468723	1469448	-	37.1901	30.8055	0	10.9037	0	0.353954
ciaR	response regulator	KO: K14983: two-component system, OmpR family, response regulator CiaR; InterPro: IPR001789: Signal transduction response regulator, receiver domain; IPR001867: Signal transduction response regulator, C-terminal; IPR011006: CheY-like superfamily; IPR011991: Winged helix-turn-helix transcription repressor DNA-binding; IPR016032: Signal transduction response regulator, C-terminal effector	EMQU_1401	1469590	1470264	+	38.8148	80.6716	111.192	0	1.37833	0
ciaH	sensor histidine kinase	KO: K14982: two-component system, OmpR family, sensor histidine kinase CiaH [EC:2.7.13.3]; InterPro: IPR003594: ATPase-like, ATP-binding domain; IPR003661: Signal transduction histidine kinase, subgroup 1, dimerisation/phosphoacceptor domain; IPR004358: Signal transduction histidine kinase-related protein, C-terminal; IPR005467: Signal transduction histidine kinase, core; IPR009082: Signal transd…	EMQU_1402	1470269	1471579	+	40.8085	69.3498	70.2791	39.2484	1.0134	0.565948
	phage integrase	InterPro: IPR002104: Integrase, catalytic; IPR011010: DNA breaking-rejoining enzyme, catalytic core; IPR013762: Integrase-like, catalytic core	EMQU_1403	1471827	1472825	+	38.038	41.3676	4.14508	2.47626	0.100201	0.0598598
	AMP-binding family protein	InterPro: IPR000873: AMP-dependent synthetase/ligase; IPR020845: AMP-binding, conserved site	EMQU_1404	1473445	1474974	+	40.7843	114.398	56.4981	50.1223	0.493874	0.438141
	phosphomethylpyrimidine kinase	KO: K00868: pyridoxine kinase [EC:2.7.1.35]; InterPro: IPR013749: Phosphomethylpyrimidine kinase type-1	EMQU_1405	1475150	1475956	+	40.2726	73.5009	59.0097	26.3625	0.802843	0.358668
	putative pyridoxine ECF transporter substrate-specific protein PdxU	InterPro: IPR009825: Protein of unknown function DUF1393	EMQU_1406	1475946	1476443	+	44.1767	180.613	7.27575	62.5896	0.0402836	0.34654
ywlG	hypothetical protein	InterPro: IPR006340: Uncharacterised protein family UPF0340	EMQU_1407	1476460	1477008	+	45.173	119.555	40.542	13.5179	0.339107	0.113069
	alpha-glucosidase	KO: K01187: alpha-glucosidase [EC:3.2.1.20]; InterPro: IPR006046: Glycoside hydrolase, family 13; IPR006047: Glycosyl hydrolase, family 13, catalytic domain; IPR006589: Glycosyl hydrolase, family 13, subfamily, catalytic domain; IPR013780: Glycosyl hydrolase, family 13, all-beta; IPR013781: Glycoside hydrolase, subgroup, catalytic domain; IPR015902: Alpha amylase; IPR017853: Glycoside hydrolase, …	EMQU_1408	1477073	1478713	-	39.8537	52.1447	63.401	101.906	1.21587	1.95429
	ATP-binding protein	InterPro: IPR002035: von Willebrand factor, type A; IPR011704: ATPase, dynein-related, AAA domain	EMQU_1409	1478890	1481127	-	41.555	465.335	492.176	492.324	1.05768	1.058
	hypothetical protein		EMQU_1410	1481150	1481629	-	40.2083	501.384	283.611	244.286	0.565657	0.487223
	degV family protein	InterPro: IPR003797: DegV	EMQU_1411	1481785	1482633	-	39.2226	36.0777	82.3066	50.1166	2.28137	1.38913
	polysaccharide biosynthesis family protein	InterPro: IPR002797: Polysaccharide biosynthesis protein; IPR004268: Flagellin assembly, membrane protein MviN	EMQU_1412	1482897	1484489	-	41.6196	102.549	29.2439	32.3004	0.285171	0.314977
	branched-chain amino acid transport	InterPro: IPR008407: Branched-chain amino acid transport, AzlD	EMQU_1413	1484618	1484935	-	37.7358	41.2803	0	1.55584	0	0.0376895
azlC	LIV-E family branched chain amino acid transporter AzlC	InterPro: IPR011606: Branched-chain amino acid transport, permease	EMQU_1414	1484928	1485707	-	39.8718	52.359	1.32722	24.1035	0.0253485	0.460351
	hypothetical protein	InterPro: IPR002524: Cation efflux protein	EMQU_1415	1485974	1486948	-	39.5897	278.749	176.786	210.081	0.634213	0.753656
	hypothetical protein		EMQU_1416	1486979	1487371	-	35.6234	314.23	79.0256	104.49	0.25149	0.332528
	hypothetical protein		EMQU_1417	1487488	1488564	-	37.6045	643.74	588.748	575.607	0.914574	0.894162
	hypothetical protein		EMQU_1418	1488564	1489442	-	38.7941	355.655	270.292	383.872	0.759983	1.07934
	hypothetical protein		EMQU_1419	1489444	1489683	-	33.3333	66.8512	38.8213	16.4919	0.580712	0.246695
	hypothetical protein		EMQU_1420	1489634	1489825	-	29.1667	17.7257	2.69592	18.038	0.152091	1.01762
	ATP-dependent Zn protease	InterPro: IPR014999: Uncharacterised protein family UPF0371	EMQU_1421	1489985	1491487	+	41.1178	197.646	150.843	116.529	0.763195	0.589585
nupC	CNT family concentrative nucleoside transporter	KO: K11535; InterPro: IPR002668: Na dependent nucleoside transporter; IPR008276: Concentrative nucleoside transporter; IPR011657: Na dependent nucleoside transporter, C-terminal	EMQU_1422	1491906	1493087	+	38.4941	46.4801	16.6408	17.5802	0.35802	0.378229
	guanylate kinase	KO: K00942: guanylate kinase [EC:2.7.4.8]; InterPro: IPR008144: Guanylate kinase; IPR008145: Guanylate kinase/L-type calcium channel	EMQU_1423	1493257	1493817	+	40.107	82.3317	25.8347	39.6863	0.313788	0.482029
	GNAT family acetyltransferase	InterPro: IPR000182: GCN5-related N-acetyltransferase (GNAT) domain; IPR016181: Acyl-CoA N-acyltransferase	EMQU_1424	1493848	1494354	-	42.2091	87.265	35.733	37.0823	0.409477	0.424939
	hypothetical protein		EMQU_1425	1494368	1495330	-	38.6293	93.906	18.8127	11.8166	0.200335	0.125834
	hypothetical protein		EMQU_1426	1495338	1496027	-	39.2754	37.3451	33.0075	32.9837	0.883851	0.883215
	glutamyl-tRNA(Gln) amidotransferase subunit A	InterPro: IPR000120: Amidase; IPR020556: Amidase, conserved site; IPR023631: Amidase signature domain	EMQU_1427	1496293	1497750	-	43.8957	199.411	290.405	147.273	1.45631	0.738538
pyrDA	dihydroorotate dehydrogenase 1A	KO: K00226: dihydroorotate dehydrogenase (fumarate) [EC:1.3.98.1]; InterPro: IPR001295: Dihydroorotate dehydrogenase, conserved site; IPR005720: Dihydroorotate dehydrogenase domain; IPR012135: Dihydroorotate dehydrogenase, class 1/ 2; IPR013785: Aldolase-type TIM barrel; IPR024920: Dihydroorotate dehydrogenase, class 1	EMQU_1428	1497897	1498838	-	42.2505	310.192	355.519	414.397	1.14613	1.33594
	lysis protein	InterPro: IPR005075: Peptidase M4, propeptide, PepSY; IPR021533: Domain of unknown function DUF2874	EMQU_1429	1498922	1499563	-	40.0312	202.201	251.552	114.827	1.24407	0.567884
cfa	cyclopropane-fatty-acyl-phospholipid synthase	KO: K00574; InterPro: IPR003333: Mycolic acid cyclopropane synthase	EMQU_1430	1499744	1500910	-	39.5887	78.3237	106.894	66.9849	1.36478	0.855232
	integral membrane protein		EMQU_1431	1501088	1501909	-	37.9562	46.1349	20.7803	41.5306	0.450424	0.9002
mdxG	maltose/maltodextrin ABC transporter permease	KO: K10110: maltose/maltodextrin transport system permease protein; InterPro: IPR000515: Binding-protein-dependent transport systems inner membrane component	EMQU_1432	1501922	1502773	-	39.9061	103.287	51.6402	39.4876	0.499969	0.382309
malC	maltose/maltodextrin ABC superfamily ATP binding cassette transporter, membrane protein	KO: K10109: maltose/maltodextrin transport system permease protein; InterPro: IPR000515: Binding-protein-dependent transport systems inner membrane component	EMQU_1433	1502776	1504074	-	40.3387	62.8791	108.385	20.9481	1.7237	0.333149
malX_1	maltose/maltodextrin ABC superfamily ATP binding cassette transporter, binding protein	KO: K10108: maltose/maltodextrin transport system substrate-binding protein; InterPro: IPR006059: Bacterial extracellular solute-binding, family 1; IPR006060: Maltose binding protein	EMQU_1434	1504218	1505477	-	39.7619	129.651	257.576	60.4702	1.98669	0.466408
	neopullulanase	InterPro: IPR004185: Glycoside hydrolase, family 13, N-terminal Ig-like domain; IPR006046: Glycoside hydrolase, family 13; IPR006047: Glycosyl hydrolase, family 13, catalytic domain; IPR006589: Glycosyl hydrolase, family 13, subfamily, catalytic domain; IPR013781: Glycoside hydrolase, subgroup, catalytic domain; IPR013783: Immunoglobulin-like fold; IPR014756: Immunoglobulin E-set; IPR015902: Alph…	EMQU_1435	1505576	1507342	-	39.4454	35.2192	101.356	14.5599	2.87785	0.413407
	mandelate racemase/muconate lactonizing protein	KO: K02549: O-succinylbenzoate synthase [EC:4.2.1.113]; InterPro: IPR001354: Mandelate racemase/muconate lactonizing enzyme; IPR010197: O-succinylbenzoic acid (OSB) synthetase, low GC Gram-positive bacteria/archaea; IPR013341: Mandelate racemase/muconate lactonizing enzyme, N-terminal; IPR013342: Mandelate racemase/muconate lactonizing enzyme, C-terminal	EMQU_1436	1507502	1508539	-	41.7148	273.541	238.862	284.079	0.873223	1.03853
menH	putative 2-succinyl-6-hydroxy-2,4-cyclohexadiene-1-carboxylate synthase	KO: K08680: 2-succinyl-6-hydroxy-2,4-cyclohexadiene-1-carboxylate synthase [EC:4.2.99.20]; InterPro: IPR000073: Alpha/beta hydrolase fold-1; IPR022485: 2-succinyl-6-hydroxy-2,4-cyclohexadiene-1-carboxylate synthase	EMQU_1437	1508605	1509441	-	41.816	314.252	181.815	144.23	0.578565	0.458962
	2-succinyl-6-hydroxy-2, 4-cyclohexadiene-1-carboxylate synthase	KO: K02551: 2-succinyl-5-enolpyruvyl-6-hydroxy-3-cyclohexene-1-carboxylate synthase [EC:2.2.1.9]; InterPro: IPR004433: Menaquinone biosynthesis protein MenD; IPR011766: Thiamine pyrophosphate enzyme, C-terminal TPP-binding; IPR012001: Thiamine pyrophosphate enzyme, N-terminal TPP-binding domain	EMQU_1438	1509441	1511150	-	41.6374	266.978	257.295	175.624	0.963731	0.657821
	menaquinone-specific isochorismate synthase	KO: K02552: menaquinone-specific isochorismate synthase [EC:5.4.4.2]; InterPro: IPR004561: Isochorismate synthase; IPR005801: ADC synthase; IPR015890: Chorismate binding, C-terminal	EMQU_1439	1511147	1512505	-	40.2502	269.748	158.447	188.946	0.587387	0.700455
	O-succinylbenzoic acid--CoA ligase	KO: K01911: O-succinylbenzoic acid--CoA ligase [EC:6.2.1.26]; InterPro: IPR000873: AMP-dependent synthetase/ligase; IPR010192: O-succinylbenzoate-CoA ligase; IPR020845: AMP-binding, conserved site; IPR023015: 2-succinylbenzoate-CoA ligase, firmicutes	EMQU_1440	1512486	1513970	-	42.6936	296.298	155.111	203.566	0.523497	0.687032
	dihydroxynaphthoic acid synthetase	KO: K01661: naphthoate synthase [EC:4.1.3.36]; InterPro: IPR001753: Crotonase, core; IPR010198: Naphthoate synthase	EMQU_1441	1513945	1514760	-	43.75	378.347	370.452	112.775	0.979133	0.298074
	transposase		EMQU_1442	1515200	1515487	-	36.4583	21.9461	7.18913	0	0.327581	0
	hypothetical protein HMPREF1013_00819	InterPro: IPR002502: N-acetylmuramoyl-L-alanine amidase domain; IPR013247: SH3, type 3	EMQU_1443	1515768	1516769	-	41.517	60.6525	74.9047	60.2397	1.23498	0.993194
	N-acetylmuramoyl-L-alanine amidase	InterPro: IPR002502: N-acetylmuramoyl-L-alanine amidase domain	EMQU_1444	1516892	1517632	-	41.5655	112.198	44.7065	18.6952	0.398461	0.166627
	hypothetical protein	InterPro: IPR009708: Bacteriophage A118, holin	EMQU_1445	1517822	1518094	-	41.3919	40.9611	17.0643	268.219	0.416598	6.54815
	hypothetical protein EfmU0317_0103		EMQU_1446	1518096	1518329	-	36.3248	20.7774	0	80.345	0	3.86695
	arpU family transcriptional regulator	InterPro: IPR006524: Transcription activator, ArpU family	EMQU_1447	1518617	1519030	-	33.8164	34.0568	0	0	0	0
	XRE family transcriptional regulator		EMQU_1448	1519672	1519932	-	32.9502	26.0792	0	43.5992	0	1.6718
	XRE family transcriptional regulator	InterPro: IPR001387: Helix-turn-helix type 3; IPR010982: Lambda repressor-like, DNA-binding	EMQU_1449	1520068	1520514	+	31.3199	31.5426	0	24.3504	0	0.771986
	hypothetical protein		EMQU_1450	1520612	1520803	+	26.5625	22.7902	35.047	28.3454	1.53781	1.24375
	comA operon protein 2	InterPro: IPR003736: Phenylacetic acid degradation-related protein; IPR006683: Thioesterase superfamily	EMQU_1451	1521007	1521366	+	38.3333	35.1138	40.2591	24.7378	1.14653	0.704504
	hypothetical protein	InterPro: IPR003740: Protein of unknown function DUF161; IPR019264: Domain of unknown function DUF2179	EMQU_1452	1521604	1522452	+	36.7491	29.7785	73.7711	12.2378	2.47733	0.410961
	organic hydroperoxide resistance family protein	InterPro: IPR003718: Peroxiredoxin, OsmC-like protein; IPR015946: K homology domain-like, alpha/beta; IPR019953: Peroxiredoxin, organic hydroperoxide resistance-related	EMQU_1453	1522616	1523026	+	39.4161	689.657	1724.13	381.6	2.49998	0.553318
	hypothetical protein	InterPro: IPR000835: Transcription regulator HTH, MarR-type; IPR011991: Winged helix-turn-helix transcription repressor DNA-binding	EMQU_1454	1523082	1523522	+	32.6531	599.745	781.708	494.756	1.3034	0.824943
	choloylglycine hydrolase	KO: K01442: choloylglycine hydrolase [EC:3.5.1.24]; InterPro: IPR003199: Choloylglycine hydrolase	EMQU_1455	1523639	1524613	+	35.2821	53.8549	52.5581	4.05954	0.975919	0.0753791
fms22	LPXTG family cell surface protein Fms22	InterPro: IPR019931: LPXTG-motif cell wall anchor	EMQU_1456	1524685	1526073	-	42.1166	66.8556	9.68902	16.385	0.144925	0.245081
	transcriptional regulator	InterPro: IPR007737: M trans-acting positive regulator	EMQU_1457	1526202	1527734	+	33.6595	33.935	11.8177	43.2468	0.348246	1.2744
	hypothetical protein	InterPro: IPR014580: Uncharacterised conserved protein UCP033199; IPR023204: SP1917 domain	EMQU_1458	1527876	1528226	+	34.7578	96.9611	5.89877	21.1434	0.0608365	0.218061
	hypothetical protein		EMQU_1459	1528296	1528823	+	33.3333	366.484	83.3286	238.008	0.227373	0.649434
	CPA2 family monovalent cation:proton (H+) antiporter-2	InterPro: IPR004771: K+/H+ exchanger; IPR006153: Cation/H+ exchanger	EMQU_1460	1528998	1530149	+	39.4097	79.3436	40.8882	64.8508	0.515331	0.817342
	hypothetical protein		EMQU_1461	1530218	1530376	-	36.478	119.254	0	28.005	0	0.234835
pbp5	penicillin binding protein 2 prime	InterPro: IPR001460: Penicillin-binding protein, transpeptidase; IPR005311: Penicillin-binding protein, dimerisation domain; IPR007887: NTF2-like N-terminal transpeptidase; IPR012338: Beta-lactamase/transpeptidase-like	EMQU_1462	1530605	1532638	-	40.5113	121.428	103.574	81.2431	0.852969	0.669063
	cell envelope-associated transcriptional attenuator	InterPro: IPR004474: Cell envelope-related transcriptional attenuator	EMQU_1463	1532814	1533695	-	38.322	39.689	76.2928	39.2663	1.92226	0.98935
	flavin reductase domain protein	InterPro: IPR002563: Flavin reductase-like, FMN-binding; IPR009002: FMN-binding split barrel-related; IPR012349: FMN-binding split barrel	EMQU_1464	1534345	1534959	-	40.4878	105.144	0	24.9389	0	0.237189
	cellulose 1,4-beta-cellobiosidase	InterPro: IPR003610: Carbohydrate-binding module family 5/12; IPR003961: Fibronectin, type III; IPR004302: Chitin-binding, domain 3; IPR013783: Immunoglobulin-like fold; IPR014756: Immunoglobulin E-set	EMQU_1465	1535109	1536056	-	40.0844	5.12859	0	12.0036	0	2.34052
	hypothetical protein		EMQU_1466	1536265	1536477	+	37.5587	34.2388	0	20.9052	0	0.61057
	ankyrin repeat-containing protein	KO: K06867; InterPro: IPR002110: Ankyrin repeat; IPR020683: Ankyrin repeat-containing domain	EMQU_1467	1536890	1537657	+	41.9271	56.9754	132.1	26.4127	2.31855	0.463581
	2',3'-cyclic-nucleotide 2'-phosphodiesterase	KO: K01119: 2',3'-cyclic-nucleotide 2'-phosphodiesterase [EC:3.1.4.16]; InterPro: IPR004843: Metallophosphoesterase domain; IPR006146: 5'-Nucleotidase, conserved site; IPR006179: 5'-Nucleotidase/apyrase; IPR008334: 5'-Nucleotidase, C-terminal	EMQU_1468	1537732	1539285	-	41.5058	40.3594	8.66026	63.9935	0.214578	1.58559
	ABC transporter substrate-binding protein	KO: K02027; InterPro: IPR006059: Bacterial extracellular solute-binding, family 1	EMQU_1469	1539308	1540591	-	40.4984	58.3126	47.5692	18.8809	0.815762	0.323787
	hypothetical protein	InterPro: IPR001279: Beta-lactamase-like; IPR011108: RNA-metabolising metallo-beta-lactamase	EMQU_1470	1540609	1541889	-	39.3443	54.2742	18.1833	13.1317	0.335026	0.241951
	ABC transporter permease	KO: K02026; InterPro: IPR000515: Binding-protein-dependent transport systems inner membrane component	EMQU_1471	1541873	1542691	-	36.0195	15.4346	0	42.2868	0	2.73974
	ABC transporter permease	KO: K02025; InterPro: IPR000515: Binding-protein-dependent transport systems inner membrane component	EMQU_1472	1542688	1543578	-	36.9248	73.1196	9.29504	16.1032	0.127121	0.220231
	ABC superfamily ATP binding cassette transporter, ABC protein	KO: K02023; InterPro: IPR003439: ABC transporter-like; IPR003593: ATPase, AAA+ type, core; IPR008995: Molybdate/tungstate binding; IPR013611: Transport-associated OB, type 2	EMQU_1473	1543575	1544645	-	38.0952	50.8434	20.2987	23.5598	0.39924	0.463379
glsB1	general stress protein GlsB1	InterPro: IPR007341: Transglycosylase-associated protein	EMQU_1474	1545199	1545441	-	40.3292	3221.26	9815.56	4110.75	3.04712	1.27613
	gls24 protein	InterPro: IPR005531: Alkaline shock protein Asp23	EMQU_1475	1545476	1546030	-	34.5946	2512.42	9391.72	4637.33	3.73812	1.84576
	hypothetical protein	InterPro: IPR018730: Protein of unknown function DUF2273	EMQU_1476	1546043	1546231	-	30.1587	2140.27	6315.48	2541.84	2.95079	1.18763
	hypothetical protein		EMQU_1477	1546244	1546810	-	34.2152	2507.27	6724.46	3692.78	2.68199	1.47283
	hypothetical protein		EMQU_1478	1547270	1547443	+	28.1609	106.18	2.97481	0	0.0280168	0
	hypothetical protein		EMQU_1479	1547505	1547669	-	34.5455	123.758	3.13707	11.9941	0.0253485	0.0969159
	accessory gene regulator protein	InterPro: IPR006741: Accessory gene regulator B	EMQU_1480	1547672	1548238	-	37.037	47.1613	20.9968	15.7065	0.445213	0.333038
	two component transcriptional regulator, LytTR family protein	KO: K07707: two-component system, AgrA family, response regulator AgrA; InterPro: IPR001789: Signal transduction response regulator, receiver domain; IPR007492: LytTr, DNA-binding domain; IPR011006: CheY-like superfamily	EMQU_1481	1548341	1549093	-	34.2629	29.7009	0.687407	26.9389	0.0231443	0.907007
	histidine kinase of the competence regulon ComD	KO: K07706: two-component system, AgrA family, sensor histidine kinase AgrC [EC:2.7.13.-]; InterPro: IPR003594: ATPase-like, ATP-binding domain	EMQU_1482	1549096	1550379	-	33.2555	6.4371	1.61252	57.7986	0.250503	8.97898
	hypothetical protein	InterPro: IPR021396: Protein of unknown function DUF3036	EMQU_1483	1550966	1551439	+	35.443	3.07715	5.4601	9.3941	1.7744	3.05285
	putative transcriptional regulator	KO: K07727; InterPro: IPR001387: Helix-turn-helix type 3; IPR010982: Lambda repressor-like, DNA-binding	EMQU_1484	1551448	1551663	+	34.7222	40.5159	79.0804	9.16215	1.95184	0.226137
	hypothetical protein		EMQU_1485	1551737	1552168	-	29.8611	6.75265	0	0	0	0
	mga-like regulatory protein	InterPro: IPR007737: M trans-acting positive regulator; IPR013199: Helix-turn-helix Mga, DNA-binding trans-acting positive regulator; IPR018356: Transcription regulator, HTH DeoR-type, conserved site	EMQU_1486	1552165	1553172	-	31.746	11.0936	23.1079	68.2253	2.08299	6.14995
	hypothetical protein	InterPro: IPR001899: Surface protein from Gram-positive cocci; IPR019931: LPXTG-motif cell wall anchor	EMQU_1487	1553325	1553669	-	42.3188	104.284	0	28.6815	0	0.275032
	wall-associated protein		EMQU_1488	1553904	1554320	-	40.2878	11.6592	45.9277	1.18646	3.93916	0.101762
	hypothetical protein		EMQU_1489	1554286	1554762	-	38.3648	68.2909	41.2358	8.29779	0.603825	0.121507
	hypothetical protein		EMQU_1490	1554759	1554956	-	36.3636	56.4767	2.61423	2.49877	0.0462887	0.0442442
glsB	general stress protein GlsB	InterPro: IPR007341: Transglycosylase-associated protein	EMQU_1491	1555432	1555674	-	41.5638	652.256	2962.99	539.549	4.54268	0.827204
gls33	general stress protein Gls33	InterPro: IPR005531: Alkaline shock protein Asp23	EMQU_1492	1555762	1556532	-	38.7808	745.997	4195.99	737.321	5.62468	0.98837
	hypothetical protein	InterPro: IPR018730: Protein of unknown function DUF2273	EMQU_1493	1556544	1556732	-	36.5079	848.904	5378.84	929.303	6.33622	1.09471
	hypothetical protein		EMQU_1494	1556744	1557307	-	36.5248	783.594	3821.56	645.639	4.87696	0.823945
fad	short chain dehydrogenase/reductase family oxidoreductase	KO: K00540; InterPro: IPR002198: Short-chain dehydrogenase/reductase SDR; IPR002347: Glucose/ribitol dehydrogenase; IPR016040: NAD(P)-binding domain; IPR020904: Short-chain dehydrogenase/reductase, conserved site	EMQU_1495	1557338	1558231	-	42.2819	1076.25	4326.79	717.783	4.02024	0.666928
	mg+2 and co2 transporter	InterPro: IPR002523: Mg2+ transporter protein, CorA-like/Zinc transport protein ZntB	EMQU_1496	1558296	1559237	-	37.8981	925.414	2252.35	478.999	2.43388	0.517606
	hypothetical protein	InterPro: IPR000361: FeS cluster biogenesis	EMQU_1497	1559264	1559614	-	34.7578	802.007	1784.38	776.668	2.22489	0.968406
	general stress protein A	InterPro: IPR002495: Glycosyl transferase, family 8	EMQU_1498	1559659	1560561	-	36.6556	1055.3	1517.31	690.357	1.43781	0.654183
	general stress protein A	InterPro: IPR002495: Glycosyl transferase, family 8	EMQU_1499	1560554	1561411	-	36.2471	734.386	643.704	140.123	0.87652	0.190803
	HAD superfamily hydrolase	KO: K07024; InterPro: IPR000150: Cof protein; IPR006379: HAD-superfamily hydrolase, subfamily IIB; IPR013200: HAD superfamily hydrolase-like, type 3; IPR023214: HAD-like domain	EMQU_1500	1561737	1562549	+	37.5154	210.503	166.809	15.8224	0.79243	0.0751649
	isochorismatase	InterPro: IPR000868: Isochorismatase-like	EMQU_1501	1562563	1563054	+	38.0081	94.8664	332.453	42.2353	3.50444	0.445208
	hypothetical protein		EMQU_1502	1563293	1563553	+	29.8851	83.8259	21.8153	3.79123	0.260245	0.0452274
	transcriptional regulator	InterPro: IPR001387: Helix-turn-helix type 3; IPR010982: Lambda repressor-like, DNA-binding	EMQU_1503	1563591	1563824	+	35.4701	112.198	42.0288	131.089	0.374595	1.16838
	hypothetical protein	InterPro: IPR004260: Pyrimidine dimer DNA glycosylase; IPR012650: Conserved hypothetical protein CHP02328	EMQU_1504	1563863	1564225	+	39.3939	129.919	325.115	31.3482	2.50245	0.241291
cspA2	cold-shock protein	KO: K03704; InterPro: IPR002059: Cold-shock protein, DNA-binding; IPR011129: Cold shock protein; IPR012156: Cold shock, CspA; IPR012340: Nucleic acid-binding, OB-fold; IPR016027: Nucleic acid-binding, OB-fold-like; IPR019844: Cold-shock conserved site	EMQU_1505	1564349	1564549	-	39.3035	154.807	301.3	265.839	1.94629	1.71723
	flavodoxin protein	InterPro: IPR005025: NADPH-dependent FMN reductase	EMQU_1506	1564734	1565210	-	40.0419	32.6166	28.2139	50.824	0.865019	1.55823
	hypothetical protein		EMQU_1507	1565630	1566343	+	43.8375	97.3743	33.3479	20.0951	0.342471	0.20637
	hypothetical protein		EMQU_1508	1566615	1566764	+	36.6667	294.956	189.793	0	0.643463	0
	mannosyl-glycoprotein endo-beta-N-acetylglucosaminidase	KO: K01227: mannosyl-glycoprotein endo-beta-N-acetylglucosaminidase [EC:3.2.1.96]; InterPro: IPR000421: Coagulation factor 5/8 C-terminal type domain; IPR000601: PKD domain; IPR005201: Glycoside hydrolase, family 85; IPR008979: Galactose-binding domain-like; IPR022409: PKD/Chitinase domain	EMQU_1509	1567514	1570357	-	42.3347	190.1	34.3986	205.278	0.18095	1.07985
	MerR family transcriptional regulator	InterPro: IPR000551: Transcription regulator HTH, MerR; IPR009061: DNA binding domain, putative	EMQU_1510	1570661	1571467	-	35.4399	50.0047	5.13128	1.22616	0.102616	0.0245209
	cobW/P47K family protein	InterPro: IPR010739: Protein of unknown function DUF1312; IPR024045: NusG, domain 2	EMQU_1511	1571819	1572226	-	37.7451	163.255	100.225	65.4824	0.613916	0.401105
	hypothetical protein		EMQU_1512	1572263	1572640	-	36.2434	235.378	273.872	7.85327	1.16354	0.0333645
rpmF2	50S ribosomal protein L32	KO: K02911: large subunit ribosomal protein L32; InterPro: IPR002677: Ribosomal protein L32p; IPR011332: Ribosomal protein, zinc-binding domain	EMQU_1513	1572671	1572838	-	39.881	81.0317	120.161	47.1196	1.48289	0.581496
rpsN1	30S ribosomal protein S14	KO: K02954: small subunit ribosomal protein S14; InterPro: IPR001209: Ribosomal protein S14; IPR023036: Ribosomal protein S14, bacterial/plastid	EMQU_1514	1572856	1573125	-	36.2963	99.0388	124.612	27.4864	1.25821	0.277532
	hypothetical protein		EMQU_1515	1573555	1573737	-	31.1475	29.2246	0	0	0	0
	mannosyl-glycoprotein endo-beta-N-acetylglucosaminidase		EMQU_1516	1573980	1575359	-	41.6667	280.44	436.224	202.563	1.5555	0.722304
	ABC transporter ATP-binding protein	KO: K02003; InterPro: IPR003439: ABC transporter-like; IPR003593: ATPase, AAA+ type, core; IPR017871: ABC transporter, conserved site	EMQU_1517	1575585	1576292	-	36.2994	52.1899	40.2104	22.3618	0.770462	0.42847
	hypothetical protein LSEI_1883	InterPro: IPR003838: Permease FtsX-like	EMQU_1518	1576486	1577862	-	32.244	56.1396	14.2843	23.3545	0.254442	0.416007
	GTP-binding protein LepA	KO: K03596: GTP-binding protein LepA; InterPro: IPR000640: Translation elongation factor EFG/EF2, C-terminal; IPR000795: Protein synthesis factor, GTP-binding; IPR004161: Translation elongation factor EFTu/EF1A, domain 2; IPR005225: Small GTP-binding protein domain; IPR006297: Elongation factor 4; IPR009000: Translation elongation/initiation factor/Ribosomal, beta-barrel; IPR009022: Elongation fa…	EMQU_1519	1578249	1580084	-	42.5381	288.378	113.616	92.1604	0.393985	0.319582
	GNAT family acetyltransferase	InterPro: IPR000182: GCN5-related N-acetyltransferase (GNAT) domain; IPR016181: Acyl-CoA N-acyltransferase	EMQU_1520	1580232	1581449	+	40.8867	150.488	95.194	78.8035	0.632571	0.523655
	hypothetical protein	InterPro: IPR007710: Nucleoside 2-deoxyribosyltransferase	EMQU_1521	1581470	1581964	+	39.798	97.2381	82.6096	17.9911	0.84956	0.185021
	hypothetical protein		EMQU_1522	1581957	1582625	+	39.3124	143.168	69.6346	24.405	0.486383	0.170464
	glucose uptake protein	InterPro: IPR010651: Sugar transport	EMQU_1523	1582708	1583562	-	40.9357	56.8644	86.5723	46.8716	1.52243	0.82427
	alpha-mannosidase	InterPro: IPR000602: Glycoside hydrolase, family 38, core; IPR011013: Glycoside hydrolase-type carbohydrate-binding; IPR011330: Glycoside hydrolase/deacetylase, beta/alpha-barrel; IPR015341: Glycoside hydrolase, family 38, central domain	EMQU_1524	1583688	1586270	-	39.7987	70.3969	6.613	38.1171	0.0939387	0.541459
manP_1	PTS system fructose/mannitol (fru) transporter subunit IIABC	KO: K02770: PTS system, fructose-specific IIC component; InterPro: IPR003352: Phosphotransferase system, EIIC; IPR006327: Phosphotransferase system, fructose IIC component; IPR013014: Phosphotransferase system, EIIC component, type 2	EMQU_1525	1586273	1587382	-	43.0631	113.006	63.8861	68.1961	0.565332	0.603471
	PTS family fructose porter component IIBC	KO: K02769: PTS system, fructose-specific IIB component [EC:2.7.1.69]; InterPro: IPR003353: Phosphotransferase system, fructose-specific IIB subunit; IPR003501: Phosphotransferase system, EIIB component, type 2/3; IPR013011: Phosphotransferase system, EIIB component, type 2	EMQU_1526	1587410	1587724	-	40	78.7166	3.28646	188.478	0.0417505	2.39439
manP_2	PTS system fructose/mannitol (fru) transporter subunit IIABC	KO: K02768: PTS system, fructose-specific IIA component [EC:2.7.1.69]; InterPro: IPR002178: Phosphotransferase system, phosphoenolpyruvate-dependent sugar EIIA 2; IPR004715: Phosphotransferase system, IIA component fructose subfamily; IPR016152: Phosphotransferase/anion transporter	EMQU_1527	1587748	1588197	-	36.8889	31.3323	1.15026	73.6636	0.0367117	2.35105
	PRD domain/PTS system IIA domain transcriptional antiterminator, BglG protein	InterPro: IPR002178: Phosphotransferase system, phosphoenolpyruvate-dependent sugar EIIA 2; IPR003501: Phosphotransferase system, EIIB component, type 2/3; IPR011608: PRD; IPR013011: Phosphotransferase system, EIIB component, type 2; IPR016152: Phosphotransferase/anion transporter	EMQU_1528	1588199	1590109	-	35.5311	26.7138	5.6881	41.1649	0.212928	1.54096
	ATP-dependent Clp protease, ATP-binding proteinClpB	KO: K03695; InterPro: IPR001270: Chaperonin ClpA/B; IPR003593: ATPase, AAA+ type, core; IPR003959: ATPase, AAA-type, core; IPR004176: Clp, N-terminal; IPR013093: ATPase, AAA-2; IPR017730: Chaperonin ClpB; IPR018368: Chaperonin ClpA/B, conserved site; IPR019489: Clp ATPase, C-terminal; IPR023150: Double Clp-N motif	EMQU_1529	1590386	1592998	-	40.4133	566.943	496.818	461.999	0.876309	0.814895
	hypothetical protein	InterPro: IPR022787: Selenoprotein B, glycine/betaine/sarcosine/D-proline reductase	EMQU_1530	1593376	1593672	-	38.0471	198.078	266.651	11.6609	1.3462	0.0588704
	conserved hypothetical protein		EMQU_1531	1593701	1593871	-	40.9357	48.3347	593.292	81.0127	12.2747	1.67608
	PTS system cellobiose-specific transporter subunit IIC	KO: K02761: PTS system, cellobiose-specific IIC component; InterPro: IPR003352: Phosphotransferase system, EIIC; IPR004501: Phosphotransferase system, lactose/cellobiose IIC component; IPR004796: Phosphotransferase system, cellobiose-specific IIC component	EMQU_1532	1593889	1595241	-	38.5809	104.209	403.229	131.642	3.86941	1.26325
	PTS system cellobiose-specific transporter subunit IIB	KO: K02760: PTS system, cellobiose-specific IIB component [EC:2.7.1.69]; InterPro: IPR003501: Phosphotransferase system, EIIB component, type 2/3; IPR013012: Phosphotransferase system, EIIB component, type 3	EMQU_1533	1595318	1595653	-	38.6905	102.737	321.97	326.892	3.13394	3.18185
	isoaspartyl aminopeptidase	KO: K01424: L-asparaginase [EC:3.5.1.1]; InterPro: IPR000246: Peptidase T2, asparaginase 2	EMQU_1534	1595701	1596648	-	43.6709	151.293	196.564	235.896	1.29922	1.5592
	dipeptidase	InterPro: IPR001261: ArgE/DapE/ACY1/CPG2/YscS, conserved site; IPR002933: Peptidase M20; IPR010964: Peptidase M20A, peptidase V-related; IPR011650: Peptidase M20, dimerisation	EMQU_1535	1596817	1598118	-	42.8571	145.26	103.762	56.2395	0.714321	0.387165
	gntR family transcriptional regulator	KO: K03710; InterPro: IPR000524: Transcription regulator HTH, GntR; IPR011663: UbiC transcription regulator-associated; IPR011991: Winged helix-turn-helix transcription repressor DNA-binding	EMQU_1536	1598129	1598857	-	38.6831	116.045	48.2826	42.7567	0.416066	0.368448
	hypothetical protein		EMQU_1537	1599086	1599271	-	37.0968	75.8039	0	21.2798	0	0.280722
	hypothetical protein	KO: K07027; InterPro: IPR022791: Lysylphosphatidylglycerol synthetase/UPF0104	EMQU_1538	1599303	1600355	-	37.037	150.059	49.1564	88.8023	0.327581	0.591784
	membrane protein	InterPro: IPR010718: Protein of unknown function DUF1294	EMQU_1539	1600366	1600638	-	35.8974	194.12	17.0643	108.738	0.087906	0.560156
	diacylglycerol kinase catalytic subunit	InterPro: IPR001206: Diacylglycerol kinase, catalytic domain; IPR005218: Diacylglycerol/lipid kinase; IPR017438: ATP-NAD kinase, PpnK-type, alpha/beta	EMQU_1540	1600652	1601554	-	39.5349	110.375	96.3009	164.371	0.872485	1.4892
pepT	M20 family tripeptide aminopeptidase	KO: K01258; InterPro: IPR001261: ArgE/DapE/ACY1/CPG2/YscS, conserved site; IPR002933: Peptidase M20; IPR010161: Peptidase M20B, tripeptide aminopeptidase; IPR011650: Peptidase M20, dimerisation	EMQU_1541	1601755	1602987	-	39.4972	296.919	175.478	316.997	0.590995	1.06762
	hypothetical protein	InterPro: IPR002678: NGG1p interacting factor 3, NIF3; IPR017221: Uncharacterised protein family UPF0135, NIF3	EMQU_1542	1603003	1604127	-	42.1333	417.043	182.661	382.171	0.437991	0.916383
	S-adenosyl-L-methionine-dependent methyltransferase	KO: K06967; InterPro: IPR006901: Protein of unknown function DUF633	EMQU_1543	1604129	1604821	-	41.9913	322.724	139.675	571.861	0.432799	1.77198
	lipoprotein		EMQU_1544	1605044	1605475	-	43.287	1082.67	559.554	734.117	0.516826	0.678059
dnaI	primosomal protein DnaI	KO: K11144; InterPro: IPR002611: IstB-like ATP-binding protein; IPR009928: Primosomal DnaI, N-terminal	EMQU_1545	1605659	1606585	-	42.3948	1007	462.896	705.574	0.45968	0.700672
dnaB2	replicative DNA helicase DnaB	KO: K03346; InterPro: IPR006343: Replication protein, DnaD/DnaB domain	EMQU_1546	1606585	1607967	-	40.3471	763.913	799.818	1117.23	1.047	1.4625
nrdR	nrdR family transcriptional regulator	KO: K07738; InterPro: IPR003796: Ribonucleotide reductase regulator NrdR-like; IPR005144: ATP-cone	EMQU_1547	1607990	1608475	-	38.6831	839.329	500.576	579.251	0.596401	0.690136
erpQ	erpQ protein		EMQU_1548	1608935	1609267	-	39.3393	858.499	1313.47	965.74	1.52997	1.12492
	dephospho-CoA kinase	KO: K00859: dephospho-CoA kinase [EC:2.7.1.24]; InterPro: IPR001977: Dephospho-CoA kinase	EMQU_1549	1609325	1609954	-	42.5397	405.159	156.928	208.112	0.387326	0.513654
	formamidopyrimidine-DNA glycosylase	KO: K10563: formamidopyrimidine-DNA glycosylase [EC:3.2.2.23 4.2.99.18]; InterPro: IPR000191: DNA glycosylase/AP lyase; IPR000214: Zinc finger, DNA glycosylase/AP lyase-type; IPR010663: Zinc finger, DNA glycosylase/AP lyase/isoleucyl tRNA synthetase; IPR010979: Ribosomal protein S13-like, H2TH; IPR012319: DNA glycosylase/AP lyase, catalytic domain; IPR015886: DNA glycosylase/AP lyase, H2TH DNA-bi…	EMQU_1550	1609918	1610754	-	40.2628	373.501	243.039	394.859	0.650705	1.05718
	DNA polymerase I	KO: K02335: DNA polymerase I [EC:2.7.7.7]; InterPro: IPR001098: DNA-directed DNA polymerase, family A, palm domain; IPR002298: DNA polymerase A; IPR002421: 5'-3' exonuclease, N-terminal; IPR002562: 3'-5' exonuclease domain; IPR008918: Helix-hairpin-helix motif, class 2; IPR012337: Ribonuclease H-like domain; IPR018320: DNA polymerase 1; IPR019760: DNA-directed DNA polymerase, family A, conserved …	EMQU_1551	1611156	1613801	-	39.8715	451.463	568.088	447.823	1.25833	0.991939
	hypothetical protein	KO: K06890; InterPro: IPR006214: Inhibitor of apoptosis-promoting Bax1-related	EMQU_1552	1614102	1614782	-	36.7107	546.161	880.938	294.965	1.61296	0.540069
	dehydratase	InterPro: IPR002539: MaoC-like dehydratase	EMQU_1553	1614784	1615257	-	35.443	444.136	209.668	441.523	0.47208	0.994116
murC	UDP-N-acetylmuramate--L-alanine ligase	KO: K01924: UDP-N-acetylmuramate--alanine ligase [EC:6.3.2.8]; InterPro: IPR000713: Mur ligase, N-terminal; IPR004101: Mur ligase, C-terminal; IPR005758: UDP-N-acetylmuramate-alanine ligase; IPR013221: Mur ligase, central; IPR016040: NAD(P)-binding domain	EMQU_1554	1615596	1616930	-	39.4757	466.16	256.288	125.264	0.549786	0.268715
	hypothetical protein	InterPro: IPR003848: Domain of unknown function DUF218; IPR014729: Rossmann-like alpha/beta/alpha sandwich fold	EMQU_1555	1617068	1617826	-	40.0527	182.562	128.211	142.104	0.702288	0.778388
	sprT family protein	KO: K03095; InterPro: IPR006640: Domain of unknown function SprT-like; IPR023524: Uncharacterised protein family SprT-like	EMQU_1556	1617848	1618315	-	40.5983	161.025	33.1806	349.923	0.206059	2.17311
tex	S1 domain RNA-binding protein	KO: K06959; InterPro: IPR003029: Ribosomal protein S1, RNA-binding domain; IPR006641: YqgF/RNase H-like domain; IPR010994: RuvA domain 2-like; IPR012340: Nucleic acid-binding, OB-fold; IPR016027: Nucleic acid-binding, OB-fold-like; IPR018974: Tex-like protein, N-terminal; IPR022967: RNA-binding domain, S1; IPR023097: Tex RuvX-like domain; IPR023319: Tex-like protein, HTH domain; IPR023323: Tex-li…	EMQU_1557	1618312	1620492	-	41.1738	122.161	60.2819	171.724	0.493464	1.40572
pphA	phosphoprotein phosphatase	KO: K07313; InterPro: IPR004843: Metallophosphoesterase domain	EMQU_1558	1620792	1621529	-	38.7534	95.5252	69.4365	104.583	0.726891	1.09482
	putative rhodanese-related sulfurtransferase	KO: K07146; InterPro: IPR001763: Rhodanese-like; IPR020936: Uncharacterised protein family UPF0176; IPR022111: Protein of unknown function DUF3650	EMQU_1559	1621721	1622659	-	41.64	152.226	120.722	57.4317	0.793047	0.37728
gloA	lactoylglutathione lyase		EMQU_1560	1622854	1623225	-	34.6774	104.557	8.34867	50.5396	0.0798479	0.483368
	hypothetical protein LmonocytFSL_02658		EMQU_1561	1623665	1624051	-	27.3902	32.664	0	1.27844	0	0.0391391
	hypothetical protein		EMQU_1562	1624434	1624826	-	26.2087	32.1653	44.7811	0	1.39222	0
	hypothetical protein		EMQU_1563	1625153	1625482	-	30	32.4127	153.717	26.9867	4.74248	0.832596
	conserved hypothetical protein		EMQU_1564	1625575	1625961	-	30.2326	48.9959	0	15.3413	0	0.313113
	conserved hypothetical protein	InterPro: IPR018958: Cell wall assembly/cell proliferation coordinating protein, KNR4-like	EMQU_1565	1626113	1626583	-	33.3333	102.193	3.29693	147.061	0.0322618	1.43905
	conserved hypothetical protein	InterPro: IPR006829: Transposase, Gram-positive bacteria	EMQU_1566	1626597	1628087	-	40.5097	63.2602	1.38864	49.1106	0.0219513	0.776327
	hypothetical protein		EMQU_1567	1628084	1628431	-	36.2069	13.971	0	1.42171	0	0.101762
	hypothetical protein		EMQU_1568	1628431	1628712	-	42.9078	22.413	0	100.004	0	4.46186
	sodium/dicarboxylate symporter family protein	KO: K06956; InterPro: IPR001991: Sodium: dicarboxylate symporter	EMQU_1569	1628929	1630320	-	42.8879	849.786	494.191	400.567	0.581548	0.471375
	hypothetical protein	InterPro: IPR003708: Bacterial protein export chaperone SecB; IPR009530: Protein of unknown function DUF1149	EMQU_1570	1630529	1630933	-	36.2963	42.0165	46.0104	79.4053	1.09506	1.88986
	phosphatase/HAD-superfamily hydrolase	InterPro: IPR005834: Haloacid dehalogenase-like hydrolase; IPR006402: HAD-superfamily hydrolase, subfamily IA, variant 3; IPR006439: HAD-superfamily hydrolase, subfamily IA, variant 1; IPR023214: HAD-like domain	EMQU_1571	1630986	1631609	-	37.9808	69.3445	107.007	32.508	1.54313	0.46879
	hypothetical protein		EMQU_1572	1631661	1632110	-	37.1111	99.3989	16.1037	162.72	0.16201	1.63704
	transcriptional regulator		EMQU_1573	1632150	1632821	-	36.1607	261.906	112.459	178.171	0.429385	0.680286
	hypothetical protein		EMQU_1574	1633031	1633318	-	37.1528	54.0212	17.9728	24.0506	0.3327	0.445208
	hypothetical protein		EMQU_1575	1633329	1633493	-	37.5758	32.4127	34.5078	20.9896	1.06464	0.647575
	nitrogen regulatory protein P-II	InterPro: IPR002187: Nitrogen regulatory protein PII; IPR011322: Nitrogen regulatory PII-like, alpha/beta	EMQU_1576	1634539	1634913	-	40.5333	101.128	8.28188	108.187	0.0818953	1.0698
	hypothetical protein	InterPro: IPR011435: Protein of unknown function DUF1538	EMQU_1577	1634910	1635683	-	38.2429	190.959	103.657	248.017	0.542826	1.2988
	hypothetical protein	InterPro: IPR011435: Protein of unknown function DUF1538	EMQU_1578	1635680	1636363	-	39.4737	175.569	48.432	141.772	0.275858	0.807502
	ISL3 family transposase	InterPro: IPR002560: Transposase, IS204/IS1001/IS1096/IS1165	EMQU_1579	1636717	1638012	+	37.4228	0	0	0	#DIV/0!	#DIV/0!
lacG2	lactose ABC superfamily ATP binding cassette transporter, membrane protein	KO: K10190: lactose/L-arabinose transport system permease protein; InterPro: IPR000515: Binding-protein-dependent transport systems inner membrane component	EMQU_1580	1638243	1639121	-	37.7702	44.2494	0	29.2688	0	0.661451
lacF2	lactose ABC superfamily ATP binding cassette transporter, membrane protein	KO: K10189: lactose/L-arabinose transport system permease protein; InterPro: IPR000515: Binding-protein-dependent transport systems inner membrane component	EMQU_1581	1639118	1639987	-	35.2874	63.7077	59.4962	76.2038	0.933894	1.19615
	lactose ABC superfamily ATP binding cassette transporter, binding protein	KO: K10188: lactose/L-arabinose transport system substrate-binding protein	EMQU_1582	1640343	1641632	-	41.0078	73.4939	6.42006	149.577	0.087355	2.03523
	two-component response regulator	InterPro: IPR001789: Signal transduction response regulator, receiver domain; IPR009057: Homeodomain-like; IPR011006: CheY-like superfamily; IPR012287: Homeodomain-related; IPR018060: Helix-turn-helix, AraC type, DNA binding; IPR018062: Helix-turn-helix, AraC type, subdomain 2; IPR020449: Transcription regulator HTH, AraC- type	EMQU_1583	1641858	1643357	+	37	93.0244	69.7058	56.0723	0.749328	0.60277
	sensor histidine kinase	KO: K02478; InterPro: IPR003594: ATPase-like, ATP-binding domain; IPR010559: Signal transduction histidine kinase, internal region	EMQU_1584	1643354	1645081	+	38.3681	84.4081	90.7628	155.756	1.07529	1.84528
lacZ	beta-galactosidase small subunit	KO: K01190: beta-galactosidase [EC:3.2.1.23]; InterPro: IPR004199: Beta galactosidase small chain/ domain 5; IPR011013: Glycoside hydrolase-type carbohydrate-binding; IPR014718: Glycoside hydrolase-type carbohydrate-binding, subgroup	EMQU_1585	1645227	1646180	-	43.501	123.841	15.7347	57.5659	0.127056	0.464838
	glycoside hydrolase	KO: K01190: beta-galactosidase [EC:3.2.1.23]; InterPro: IPR006101: Glycoside hydrolase, family 2; IPR006102: Glycoside hydrolase, family 2, immunoglobulin-like beta-sandwich; IPR006103: Glycoside hydrolase, family 2, TIM barrel; IPR006104: Glycoside hydrolase, family 2, N-terminal; IPR008979: Galactose-binding domain-like; IPR013781: Glycoside hydrolase, subgroup, catalytic domain; IPR013812: Gly…	EMQU_1586	1646161	1648038	-	41.3738	52.2952	20.396	64.8083	0.390016	1.23928
	alpha-galactosidase	KO: K07407: alpha-galactosidase [EC:3.2.1.22]; InterPro: IPR000111: Glycoside hydrolase, clan GH-D; IPR002252: Glycoside hydrolase, family 36; IPR013785: Aldolase-type TIM barrel; IPR017853: Glycoside hydrolase, superfamily	EMQU_1587	1648022	1650256	-	41.1186	80.923	20.8437	100.058	0.257574	1.23646
	lacI family transcriptional regulator	InterPro: IPR000843: Transcription regulator HTH, LacI; IPR001761: Periplasmic binding protein/LacI transcriptional regulator; IPR010982: Lambda repressor-like, DNA-binding	EMQU_1588	1650370	1651398	+	43.829	57.6436	45.7757	77.4108	0.794116	1.34292
	5- methyltetrahydropteroyltriglutamate/homocysteine S-methyltransferase	InterPro: IPR002629: Methionine synthase, vitamin-B12 independent	EMQU_1589	1651824	1652954	-	42.2635	75.6583	18.3065	20.5601	0.241963	0.27175
	merR family transcriptional regulator	InterPro: IPR000551: Transcription regulator HTH, MerR; IPR009061: DNA binding domain, putative	EMQU_1590	1653314	1654078	-	35.817	38.1326	12.1792	2.58696	0.319392	0.0678412
	ABC transporter ATP-binding protein/permease	KO: K06147; InterPro: IPR001140: ABC transporter, transmembrane domain; IPR003439: ABC transporter-like; IPR003593: ATPase, AAA+ type, core; IPR011527: ABC transporter, transmembrane domain, type 1; IPR017871: ABC transporter, conserved site; IPR017940: ABC transporter, integral membrane type 1	EMQU_1591	1654176	1655924	+	38.9937	89.7882	10.3583	26.5907	0.115363	0.296149
	ABC superfamily ATP binding cassette transporter, membrane protein	KO: K06147; InterPro: IPR001140: ABC transporter, transmembrane domain; IPR003439: ABC transporter-like; IPR003593: ATPase, AAA+ type, core; IPR011527: ABC transporter, transmembrane domain, type 1; IPR017871: ABC transporter, conserved site; IPR017940: ABC transporter, integral membrane type 1	EMQU_1592	1655911	1657698	+	38.9262	31.2706	6.65839	115.111	0.212928	3.68112
	cell wall anchor domain-containing protein	InterPro: IPR001899: Surface protein from Gram-positive cocci; IPR005046: Protein of unknown function DUF285, lipoprotein predicted; IPR011080: Bacterial Ig-like; IPR011889: Bacterial surface protein 26-residue repeat; IPR019931: LPXTG-motif cell wall anchor	EMQU_1593	1657764	1660202	-	41.4514	44.2535	10.399	29.0078	0.234988	0.655492
	hypothetical protein		EMQU_1594	1660278	1660778	-	43.1138	60.1673	2.06634	26.6635	0.0343432	0.443156
	hypothetical protein	InterPro: IPR007737: M trans-acting positive regulator; IPR011991: Winged helix-turn-helix transcription repressor DNA-binding; IPR013199: Helix-turn-helix Mga, DNA-binding trans-acting positive regulator	EMQU_1595	1660968	1662455	+	37.4328	38.8822	1.39144	8.97742	0.0357862	0.230888
	hypothetical protein		EMQU_1596	1662608	1662739	-	33.3333	14.733	7.84269	0	0.53232	0
	hypothetical protein	InterPro: IPR021462: Protein of unknown function DUF3114	EMQU_1597	1662756	1663112	-	35.8543	136.188	13.0492	52.6631	0.0958175	0.386695
	hypothetical protein		EMQU_1598	1663130	1663279	-	37.3333	81.0317	0	49.4756	0	0.61057
	putative small protein		EMQU_1599	1663516	1663644	-	31.0078	15.0757	0	0	0	0
	acetyltransferase	InterPro: IPR000182: GCN5-related N-acetyltransferase (GNAT) domain; IPR016181: Acyl-CoA N-acyltransferase	EMQU_1600	1664781	1665236	-	37.2807	76.7669	64.7022	8.67993	0.842839	0.113069
	23S rRNA (uracil-5-)-methyltransferase	KO: K03215; InterPro: IPR001566: 23S rRNA methyltransferase/RumA; IPR002792: Deoxyribonuclease/rho motif-related TRAM; ; IPR016027: Nucleic acid-binding, OB-fold-like	EMQU_1601	1665622	1666986	-	38.1685	174.174	170.643	241.76	0.979729	1.38804
dgkA	diacylglycerol kinase	KO: K07029; InterPro: IPR001206: Diacylglycerol kinase, catalytic domain; IPR005218: Diacylglycerol/lipid kinase	EMQU_1602	1667150	1668196	-	42.0248	1078.26	810.291	805.691	0.751483	0.747217
gatB	aspartyl/glutamyl-tRNA amidotransferase subunitB	KO: K02434: aspartyl-tRNA(Asn)/glutamyl-tRNA (Gln) amidotransferase subunit B [EC:6.3.5.6 6.3.5.7]; InterPro: IPR003789: Aspartyl/glutamyl-tRNA amidotransferase subunit B-related; IPR004413: Glutamyl-tRNA(Gln) amidotransferase, B subunit; IPR006075: Aspartyl/Glutamyl-tRNA(Gln) amidotransferase, subunit B/E, catalytic; IPR017958: Glutamyl-tRNA(Gln) amidotransferase, subunit B, conserved site; IPR0…	EMQU_1603	1668206	1669636	-	40.1118	1011.45	791.076	908.954	0.782118	0.898662
gatA	aspartyl/glutamyl-tRNA amidotransferase subunitA	KO: K02433: aspartyl-tRNA(Asn)/glutamyl-tRNA (Gln) amidotransferase subunit A [EC:6.3.5.6 6.3.5.7]; InterPro: IPR000120: Amidase; IPR004412: Glutamyl-tRNA(Gln) amidotransferase A subunit; IPR020556: Amidase, conserved site; IPR023631: Amidase signature domain	EMQU_1604	1669633	1671105	-	42.2946	895.475	841.26	911.923	0.939457	1.01837
gatC	aspartyl/glutamyl-tRNA amidotransferase subunitC	KO: K02435: aspartyl-tRNA(Asn)/glutamyl-tRNA (Gln) amidotransferase subunit C [EC:6.3.5.6 6.3.5.7]; InterPro: IPR003837: Glu-tRNAGln amidotransferase, C subunit	EMQU_1605	1671105	1671410	-	41.5033	656.198	566.673	496.373	0.863569	0.756437
ligA	DNA ligase	KO: K01972: DNA ligase (NAD+) [EC:6.5.1.2]; InterPro: IPR001357: BRCT; IPR001679: NAD-dependent DNA ligase; IPR004149: Zinc-finger, NAD-dependent DNA ligase C4-type; IPR004150: NAD-dependent DNA ligase, OB-fold; IPR010994: RuvA domain 2-like; IPR012340: Nucleic acid-binding, OB-fold; IPR013839: NAD-dependent DNA ligase, adenylation; IPR013840: NAD-dependent DNA ligase, N-terminal; IPR016027: Nucl…	EMQU_1606	1671504	1673546	-	42.3397	558.06	700.544	446.806	1.25532	0.800641
	ATP-dependent DNA helicase	KO: K03657: DNA helicase II / ATP-dependent DNA helicase PcrA [EC:3.6.4.12]; InterPro: IPR000212: DNA helicase, UvrD/REP type; IPR005751: DNA helicase, ATP-dependent, PcrA type; IPR013986: DNA helicase, DEXX box type; IPR014016: Helicase, superfamily 1, UvrD-related; IPR014017: DNA helicase, UvrD-like, C-terminal	EMQU_1607	1673567	1675810	-	40.7754	388.259	533.764	500.268	1.37476	1.28849
fruAB	PTS system fructose/mannitol (fru) transporter subunit IIABC	KO: K02770: PTS system, fructose-specific IIC component; InterPro: IPR002178: Phosphotransferase system, phosphoenolpyruvate-dependent sugar EIIA 2; IPR003352: Phosphotransferase system, EIIC; IPR003353: Phosphotransferase system, fructose-specific IIB subunit; IPR003501: Phosphotransferase system, EIIB component, type 2/3; IPR004715: Phosphotransferase system, IIA component fructose subfamily; I…	EMQU_1608	1676410	1678341	-	41.5631	261.969	407.503	237.647	1.55554	0.907155
fruK	1-phosphofructokinase	KO: K00882: 1-phosphofructokinase [EC:2.7.1.56]; InterPro: IPR002173: Carbohydrate/puine kinase, PfkB, conserved site; IPR011611: Carbohydrate/purine kinase; IPR017583: Tagatose/fructose phosphokinase; IPR022463: 1-phosphofructokinase	EMQU_1609	1678360	1679274	-	39.6721	239.11	142.557	112.469	0.596198	0.470365
	deoR family transcriptional regulator	KO: K03436; InterPro: IPR001034: Transcription regulator HTH, DeoR N-terminal; IPR011991: Winged helix-turn-helix transcription repressor DNA-binding; IPR014036: Transcription regulator HTH, DeoR; IPR018356: Transcription regulator, HTH DeoR-type, conserved site	EMQU_1610	1679271	1680029	-	39.5257	137.722	94.1122	48.8889	0.68335	0.354983
	hypothetical protein		EMQU_1611	1680278	1681603	-	37.8582	122.098	86.6599	34.7001	0.709759	0.284199
	hypothetical protein		EMQU_1612	1681730	1681879	+	34.6667	129.651	34.5078	3.29837	0.26616	0.0254404
engB	GTP-binding protein YsxC	KO: K03978; InterPro: IPR005225: Small GTP-binding protein domain; IPR006073: GTP binding domain; IPR019987: GTP-binding protein, ribosome biogenesis, YsxC	EMQU_1613	1681947	1682633	-	40.7569	283.08	224.527	115.947	0.793156	0.409591
clpX	S14 family endopeptidase ClpX	KO: K03544: ATP-dependent Clp protease ATP-binding subunit ClpX; InterPro: IPR003593: ATPase, AAA+ type, core; IPR004487: Clp protease, ATP-binding subunit ClpX; IPR010603: Zinc finger, ClpX C4-type; IPR013093: ATPase, AAA-2; IPR019489: Clp ATPase, C-terminal	EMQU_1614	1682650	1683897	-	39.2628	1104.45	613.426	614.48	0.555415	0.556369
tig	cell division trigger factor	KO: K03545; InterPro: IPR001179: Peptidyl-prolyl cis-trans isomerase, FKBP-type, domain; IPR005215: Trigger factor; IPR008880: Trigger factor, C-terminal, bacterial; IPR008881: Trigger factor, ribosome-binding, bacterial	EMQU_1615	1684085	1685371	-	38.2284	1984.43	912.165	1310.12	0.459661	0.660202
	hypothetical protein		EMQU_1616	1685523	1686458	-	38.141	524.629	514.852	989.512	0.981365	1.88612
	hypothetical protein	InterPro: IPR010432: RDD	EMQU_1617	1686547	1687053	-	36.0947	413.31	344.057	456.698	0.832444	1.10498
	putative integral inner membrane protein		EMQU_1618	1686945	1687409	-	38.4946	562.517	263.818	384.101	0.468995	0.682825
sppA	S49 family peptidase	KO: K04773; InterPro: IPR002142: Peptidase S49; IPR004635: Peptidase S49, SppA; IPR023562: Peptidase S14/S49	EMQU_1619	1687412	1688437	-	42.1053	487.612	199.278	700.663	0.408681	1.43693
	hypothetical protein		EMQU_1620	1688449	1688739	-	39.8625	389.287	144.079	334.938	0.370111	0.860389
glmS	glutamine--fructose-6-phosphate transaminase	KO: K00820: glucosamine--fructose-6-phosphate aminotransferase (isomerizing) [EC:2.6.1.16]; InterPro: IPR000583: Glutamine amidotransferase, class-II; IPR001347: Sugar isomerase (SIS); IPR005855: Glucosamine-fructose-6-phosphate aminotransferase, isomerising; IPR017932: Glutamine amidotransferase, type II	EMQU_1621	1689131	1690939	+	41.5699	301.282	2502.25	723.126	8.30532	2.40016
	predicted protein	KO: K09686: antibiotic transport system permease protein; InterPro: IPR000412: ABC-2; IPR013525: ABC-2 type transporter	EMQU_1622	1691037	1691795	-	38.4717	42.2774	3.40986	112.77	0.0806545	2.66739
sagG	putative ABC transporter, ATP-binding protein SagG	KO: K09687: antibiotic transport system ATP-binding protein; InterPro: IPR003439: ABC transporter-like	EMQU_1623	1691796	1692497	-	37.8917	44.3251	8.11081	32.4199	0.182985	0.731412
	hypothetical protein		EMQU_1624	1692529	1692822	+	29.932	29.7668	14.0848	58.8995	0.473173	1.9787
	predicted protein	InterPro: IPR001387: Helix-turn-helix type 3; IPR010057: Transcription activator MutR, C-terminal; IPR010982: Lambda repressor-like, DNA-binding	EMQU_1625	1692819	1693778	+	32.0833	23.2966	0.539185	59.783	0.0231443	2.56617
glmM	phosphoglucosamine mutase	KO: K03431: phosphoglucosamine mutase [EC:5.4.2.10]; InterPro: IPR005841: Alpha-D-phosphohexomutase superfamily; IPR005843: Alpha-D-phosphohexomutase, C-terminal; IPR005844: Alpha-D-phosphohexomutase, alpha/beta/alpha domain I; IPR005845: Alpha-D-phosphohexomutase, alpha/beta/alpha domain II; IPR005846: Alpha-D-phosphohexomutase, alpha/beta/alpha domain III; IPR006352: Phosphoglucosamine mutase; …	EMQU_1626	1693852	1695207	-	42.7729	1027.96	580.602	606.404	0.564812	0.589913
	hypothetical protein	InterPro: IPR012505: YbbR-like	EMQU_1627	1695231	1696406	-	43.3673	1096.41	788.75	591.94	0.719394	0.53989
	hypothetical protein	InterPro: IPR003390: DNA integrity scanning protein, DisA, N-terminal; IPR014046: Conserved hypothetical protein CHP00159	EMQU_1628	1696403	1697287	-	40.339	622.434	682.553	673.651	1.09659	1.08228
nifJ	pyruvate synthase	KO: K03737: putative pyruvate-flavodoxin oxidoreductase [EC:1.2.7.-]; InterPro: IPR001450: 4Fe-4S binding domain; IPR002869: Pyruvate-flavodoxin oxidoreductase, central domain; IPR002880: Pyruvate flavodoxin/ferredoxin oxidoreductase, N-terminal; IPR009014: Transketolase, C-terminal/Pyruvate-ferredoxin oxidoreductase, domain II; IPR011766: Thiamine pyrophosphate enzyme, C-terminal TPP-binding; IP…	EMQU_1629	1697458	1701135	-	42.6047	262.791	288.785	209.847	1.09891	0.798533
dsbG	thioredoxin superfamily protein	InterPro: IPR012336: Thioredoxin-like fold	EMQU_1630	1701426	1701941	+	36.2403	641.658	724.263	569.545	1.12874	0.887613
	hypothetical protein		EMQU_1631	1702313	1703293	-	37.2069	59.4728	5.80407	22.1909	0.0975919	0.373126
	hypothetical protein		EMQU_1632	1703893	1704198	-	37.2549	58.7877	77.8118	0	1.32361	0
	hypothetical protein		EMQU_1633	1704214	1704678	-	36.7742	38.6861	0	0	0	0
	hypothetical protein	InterPro: IPR011991: Winged helix-turn-helix transcription repressor DNA-binding	EMQU_1634	1704832	1705116	-	36.1404	8.52966	45.405	8.67993	5.3232	1.01762
	hypothetical protein		EMQU_1635	1705154	1705342	-	33.3333	41.159	0	0	0	0
	hypothetical protein		EMQU_1636	1705339	1705572	-	36.7521	24.9328	0	19.0291	0	0.763213
whiA	hypothetical protein	KO: K09762; InterPro: IPR003802: Sporulation regulator WhiA; IPR018478: Sporulation regulator WhiA, N-terminal; IPR023054: Sporulation regulator WhiA, C-terminal	EMQU_1637	1705775	1706710	-	39.9573	214.007	163.691	303.937	0.764886	1.42022
	hypothetical protein	InterPro: IPR002882: LPPG: FO 2-phospho-L-lactate transferase CofD/UPF0052; IPR010119: Uncharacterised protein family UPF0052	EMQU_1638	1706747	1707742	-	42.2691	245.048	136.68	124.186	0.557769	0.506782
	glmZ(sRNA)-inactivating NTPase	KO: K06958; InterPro: IPR005337: ATPase, P-loop-containing	EMQU_1639	1707739	1708623	-	38.6441	143.385	75.4493	179.454	0.526201	1.25155
racX	aspartate racemase	KO: K01779: aspartate racemase [EC:5.1.1.13]; InterPro: IPR001920: Asp/Glu racemase; IPR004380: Aspartate racemase; IPR015942: Asp/Glu/hydantoin racemase; IPR018187: Asp/Glu racemase, active site	EMQU_1640	1708999	1709703	-	39.0071	243.44	208.515	355.803	0.856537	1.46156
carB2	ATP-grasp superfamily protein	InterPro: IPR011761: ATP-grasp fold; IPR013815: ATP-grasp fold, subdomain 1; IPR013816: ATP-grasp fold, subdomain 2	EMQU_1641	1709707	1710969	-	37.6089	199.788	303.275	135.147	1.51798	0.676451
	excinuclease ABC subunit A	KO: K03701: excinuclease ABC subunit A; InterPro: IPR003439: ABC transporter-like; IPR003593: ATPase, AAA+ type, core; IPR004602: Excinuclease ABC, A subunit; IPR013815: ATP-grasp fold, subdomain 1; IPR017871: ABC transporter, conserved site	EMQU_1642	1711235	1714054	-	42.6596	343.954	699.518	358.435	2.03375	1.0421
	excinuclease ABC subunit B	KO: K03702: excinuclease ABC subunit B; InterPro: IPR001650: Helicase, C-terminal; IPR001943: UvrB/UvrC protein; IPR004807: UvrABC system, B subunit; IPR006935: Helicase/UvrB domain; IPR009055: UvrB, C-terminal UvrC-binding; IPR014001: DEAD-like helicase; IPR024759: UvrB, YAD/RRR-motif-containing domain	EMQU_1643	1714064	1716058	-	42.1554	302.681	431.996	236.59	1.42723	0.781648
	amino acid ABC transporter amino acid-binding/permease protein	KO: K02029; InterPro: IPR000515: Binding-protein-dependent transport systems inner membrane component; IPR001638: Extracellular solute-binding protein, family 3; IPR010065: Amino acid ABC transporter, permease protein, 3-TM domain, His/Glu/Gln/Arg/opine family	EMQU_1644	1716353	1717846	+	41.1647	346.582	249.108	259.3	0.718756	0.748164
	amino acid ABC transporter ATP-binding protein	KO: K02028; InterPro: IPR003439: ABC transporter-like; IPR003593: ATPase, AAA+ type, core; IPR017871: ABC transporter, conserved site	EMQU_1645	1717848	1718585	+	38.7534	289.211	232.156	262.127	0.802723	0.906352
galA	arabinogalactan endo-1,4-beta-galactosidase	KO: K01224; InterPro: IPR011683: Glycosyl hydrolase 53; IPR013781: Glycoside hydrolase, subgroup, catalytic domain; IPR017853: Glycoside hydrolase, superfamily	EMQU_1646	1718646	1720277	-	42.7083	127.208	86.9039	182.199	0.683164	1.43229
lacE	PTS family lactose-N,N'-diacetylchitobiose-beta-glucoside (lac) porter component IIBC	KO: K02788: PTS system, lactose-specific IIC component; InterPro: IPR003352: Phosphotransferase system, EIIC; IPR003501: Phosphotransferase system, EIIB component, type 2/3; IPR004501: Phosphotransferase system, lactose/cellobiose IIC component; IPR013012: Phosphotransferase system, EIIB component, type 3; IPR014350: Phosphotransferase system, EIIB component, type 3, subgroup	EMQU_1647	1720298	1721980	-	40.8794	121.62	95.3425	101.421	0.783938	0.833914
	PTS system, lactose/cellobiose-specific IIA component	KO: K02786: PTS system, lactose-specific IIA component [EC:2.7.1.69]; InterPro: IPR003188: Phosphotransferase system, lactose/cellobiose-specific IIA subunit	EMQU_1648	1721999	1722310	-	34.2949	63.8904	51.4299	98.3169	0.804971	1.53884
lacG	6-phospho-beta-galactosidase	KO: K01220: 6-phospho-beta-galactosidase [EC:3.2.1.85]; InterPro: IPR001360: Glycoside hydrolase, family 1; IPR005928: 6-phospho-beta-galactosidase; IPR013781: Glycoside hydrolase, subgroup, catalytic domain; IPR017853: Glycoside hydrolase, superfamily; IPR018120: Glycoside hydrolase, family 1, active site	EMQU_1649	1722327	1723727	-	39.4004	66.977	117.489	198.467	1.75417	2.96322
lacR	lactose PTS family porter repressor	KO: K02530; InterPro: IPR001034: Transcription regulator HTH, DeoR N-terminal; IPR011991: Winged helix-turn-helix transcription repressor DNA-binding; IPR014036: Transcription regulator HTH, DeoR; IPR018356: Transcription regulator, HTH DeoR-type, conserved site	EMQU_1650	1723954	1724730	+	37.9665	132.654	37.9719	31.8376	0.286247	0.240004
	haloacid dehalogenase (HAD) superfamily hydrolase	InterPro: IPR005833: Haloacid dehalogenase/epoxide hydrolase; IPR005834: Haloacid dehalogenase-like hydrolase; IPR006402: HAD-superfamily hydrolase, subfamily IA, variant 3; IPR023214: HAD-like domain	EMQU_1651	1724741	1725439	+	37.196	68.164	145.14	520.945	2.12928	7.64251
dnaJ	chaperone DnaJ	KO: K03686; InterPro: IPR001305: Heat shock protein DnaJ, cysteine-rich domain; IPR001623: Heat shock protein DnaJ, N-terminal; IPR002939: Chaperone DnaJ, C-terminal; IPR003095: Heat shock protein DnaJ; IPR008971: HSP40/DnaJ peptide-binding; IPR012724: Chaperone DnaJ; IPR018253: Heat shock protein DnaJ, conserved site	EMQU_1652	1725468	1726634	-	44.5587	549.933	560.198	245.894	1.01867	0.447135
dnaK	chaperone DnaK	KO: K04043: molecular chaperone DnaK; InterPro: IPR001023: Heat shock protein Hsp70; IPR012725: Chaperone DnaK; IPR013126: Heat shock protein 70; IPR018181: Heat shock protein 70, conserved site	EMQU_1653	1726989	1728818	-	39.7814	1943.43	2134.96	833.515	1.09855	0.428888
grpE	co-chaperone GrpE	KO: K03687; InterPro: IPR000740: GrpE nucleotide exchange factor; IPR009012: GrpE nucleotide exchange factor, head; IPR013805: GrpE nucleotide exchange factor, coiled-coil	EMQU_1654	1728874	1729422	-	39.3443	1338.13	665.643	489.349	0.497442	0.365696
hrcA	heat-inducible transcription repressor	KO: K03705; InterPro: IPR002571: Winged helix-turn-helix transcription repressor, HrcA; IPR005104: Winged helix-turn-helix transcription repressor, HrcA DNA-binding domain; IPR011991: Winged helix-turn-helix transcription repressor DNA-binding; IPR021153: Winged helix-turn-helix transcription repressor, HrcA, C-terminal	EMQU_1655	1729502	1730545	-	40.7088	759.091	373.339	275.812	0.491824	0.363346
hemN	coproporphyrinogen dehydrogenase	KO: K02495: oxygen-independent coproporphyrinogen III oxidase [EC:1.3.99.22]; InterPro: IPR004559: Coproporphyrinogen III oxidase, oxygen-independent related; IPR006638: Elongator protein 3/MiaB/NifB; IPR007197: Radical SAM; IPR010723: HemN, C-terminal; IPR023404: Radical SAM, alpha/beta horseshoe	EMQU_1656	1730778	1731959	-	40.0169	109.002	63.9358	61.112	0.586556	0.56065
	COG2801: Transposase and inactivated derivatives		EMQU_1657	1732315	1732443	-	32.5581	15.0757	0	0	0	0
	hypothetical protein		EMQU_1658	1732770	1733000	-	30.7359	21.0472	38.0931	0	1.80989	0
	hypothetical protein		EMQU_1659	1733099	1733266	+	30.9524	167.851	203.35	53.0096	1.21149	0.315812
[truncated: 1,322 more rows]

## Sheet: Table S3
Table S3 RNA-seq data of all chromosomal genes under high sugar conditions
[truncated: 2,982 more rows]

[truncated: 1 more sheets: Table S4]
